# Supplementary material for: Integrated Proteomic Analysis of Human Cancer Cells and Plasma from Tumor Bearing Mice for Ovarian Cancer Biomarker Discovery
Source: PLOS journal article supplement (doi:10.1371/journal.pone.0007916), 2009-11-19

Figure S1A

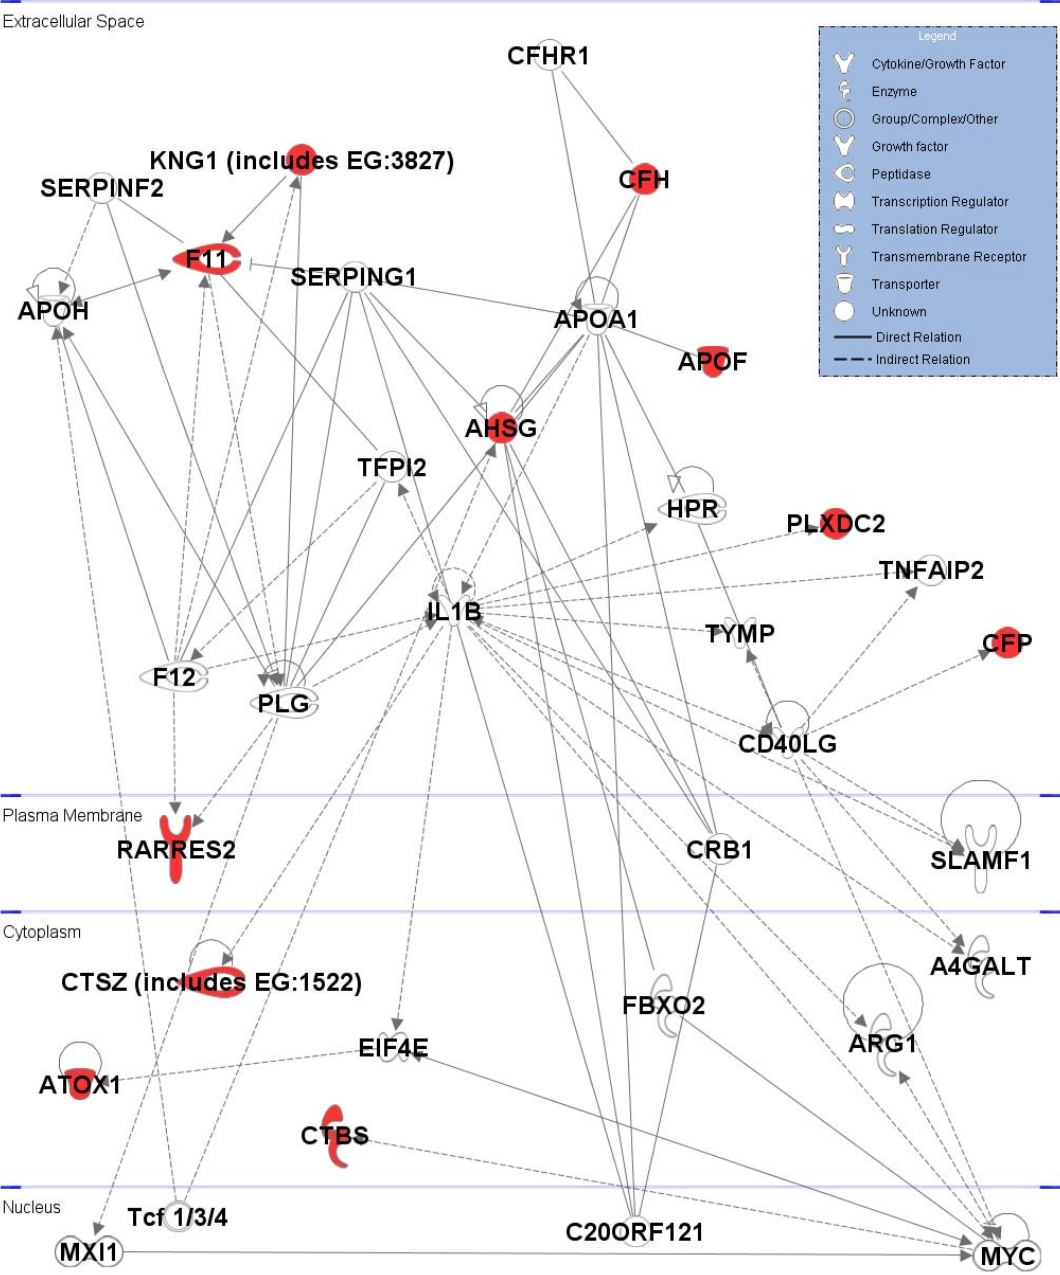

Figure S1B

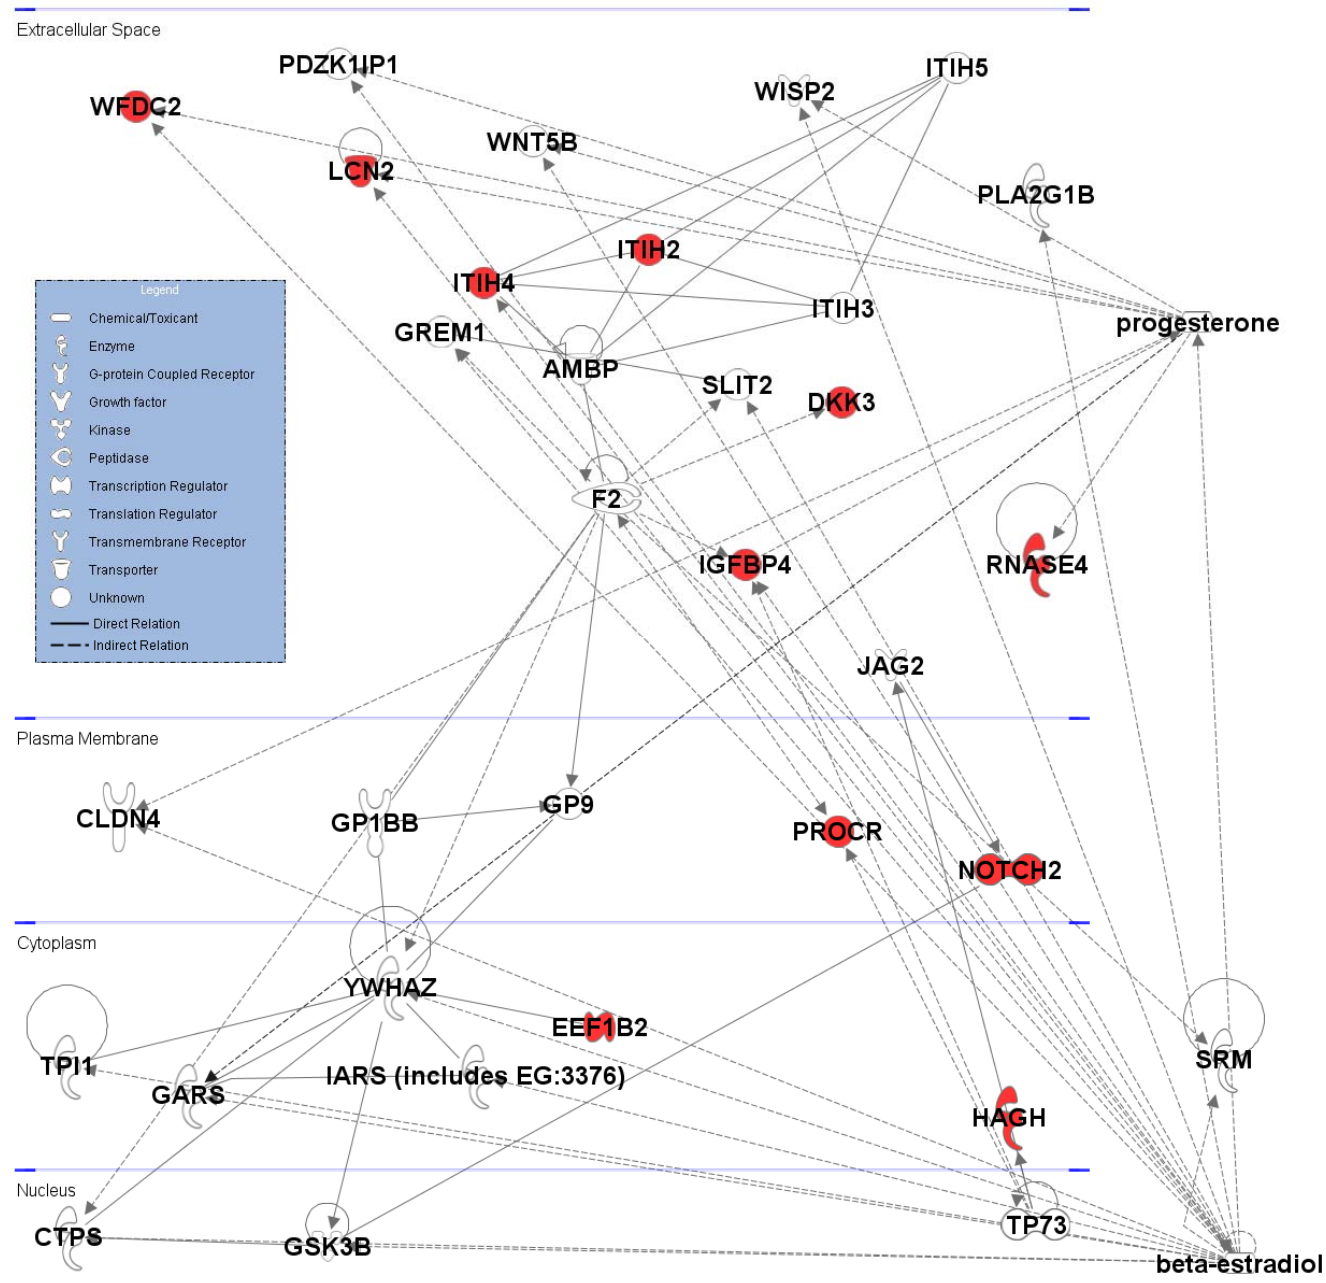

Supplement: S1 (10.1371/journal.pone.0007916.s001) [file journal.pone.0007916.s001]
