# Supplementary material for: Integrated Proteomic Analysis of Human Cancer Cells and Plasma from Tumor Bearing Mice for Ovarian Cancer Biomarker Discovery
Source: PLOS journal article supplement (doi:10.1371/journal.pone.0007916), 2009-11-19

Figure S2A

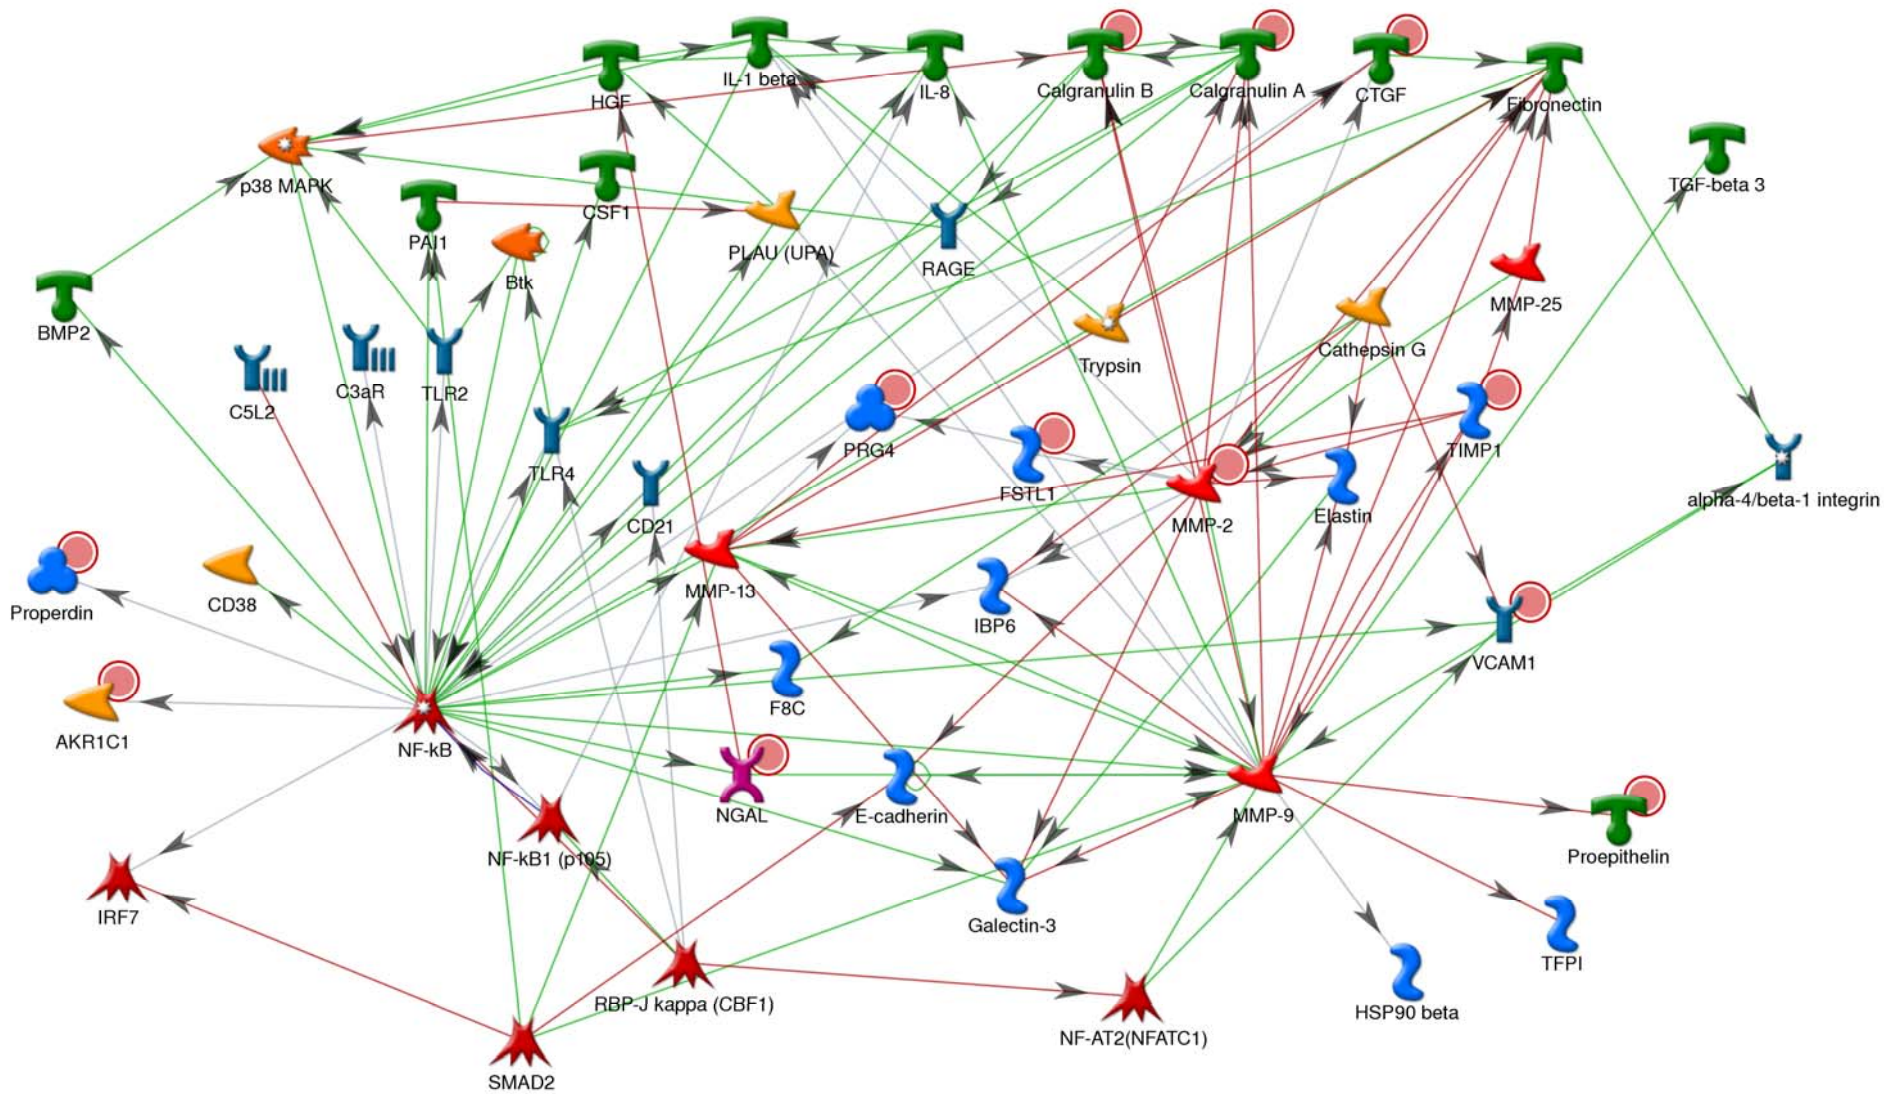

Figure S2B

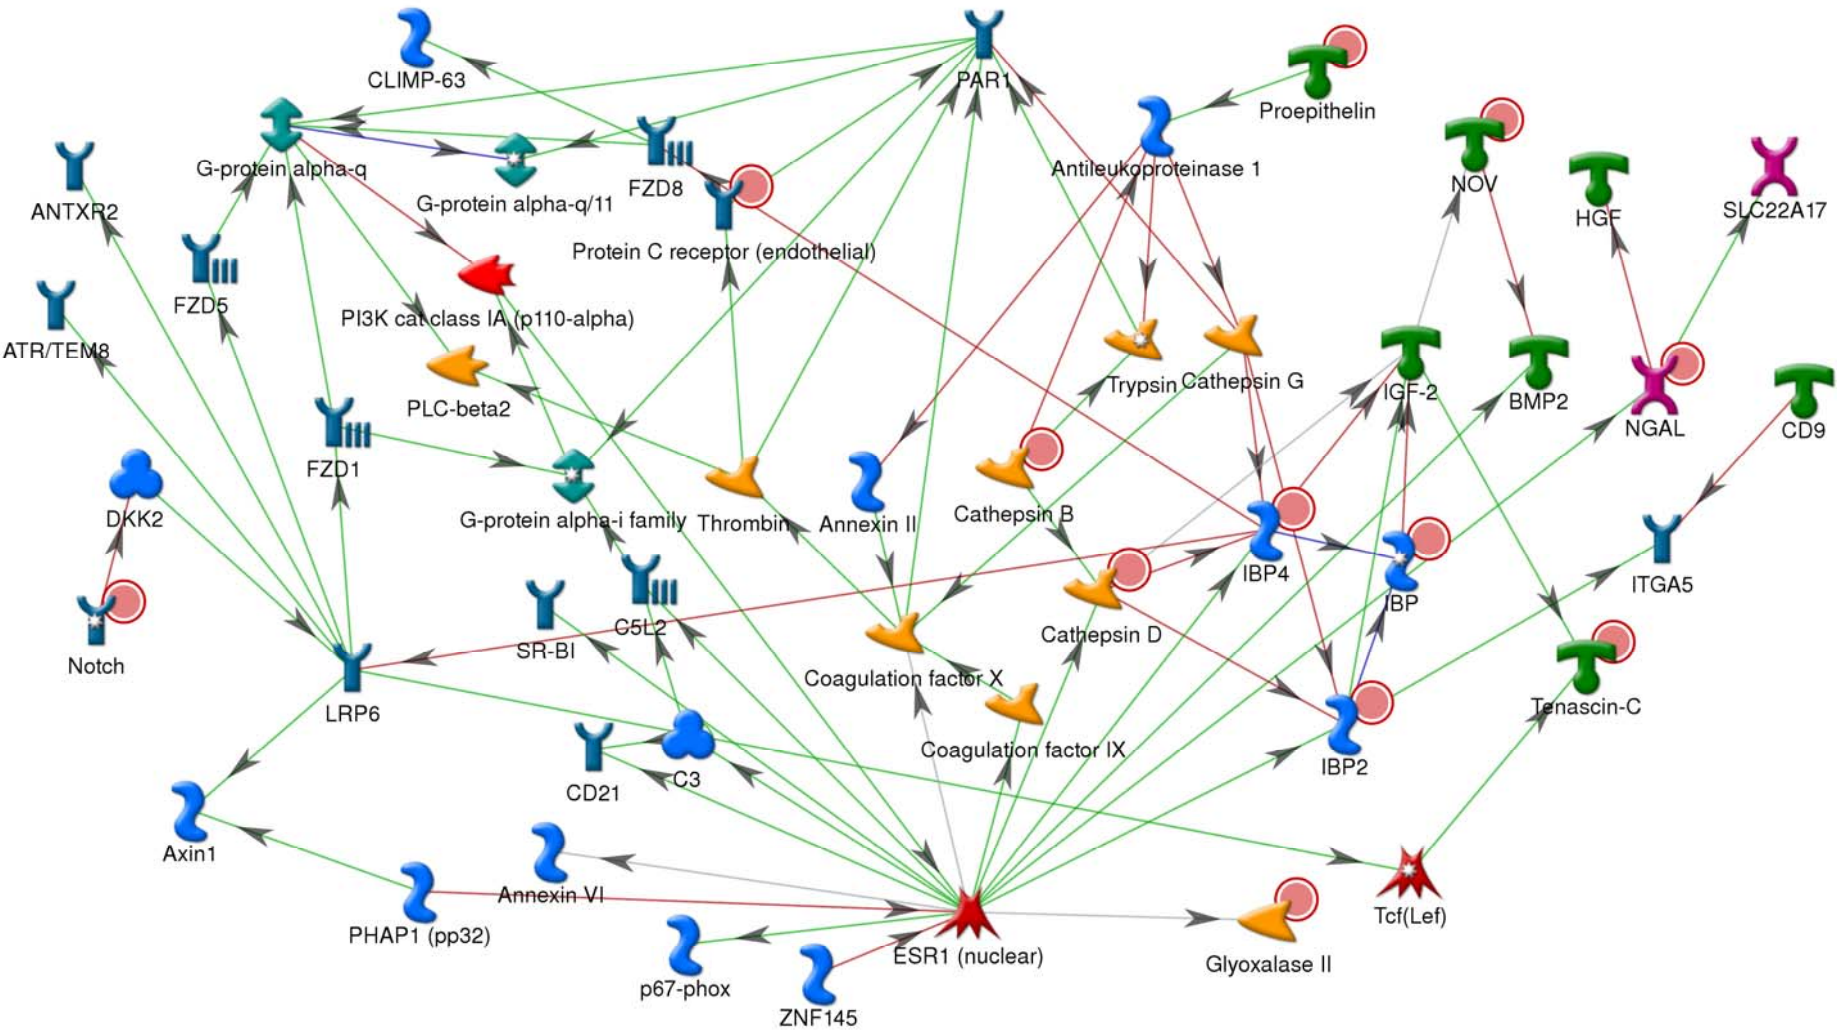



Figure S2C

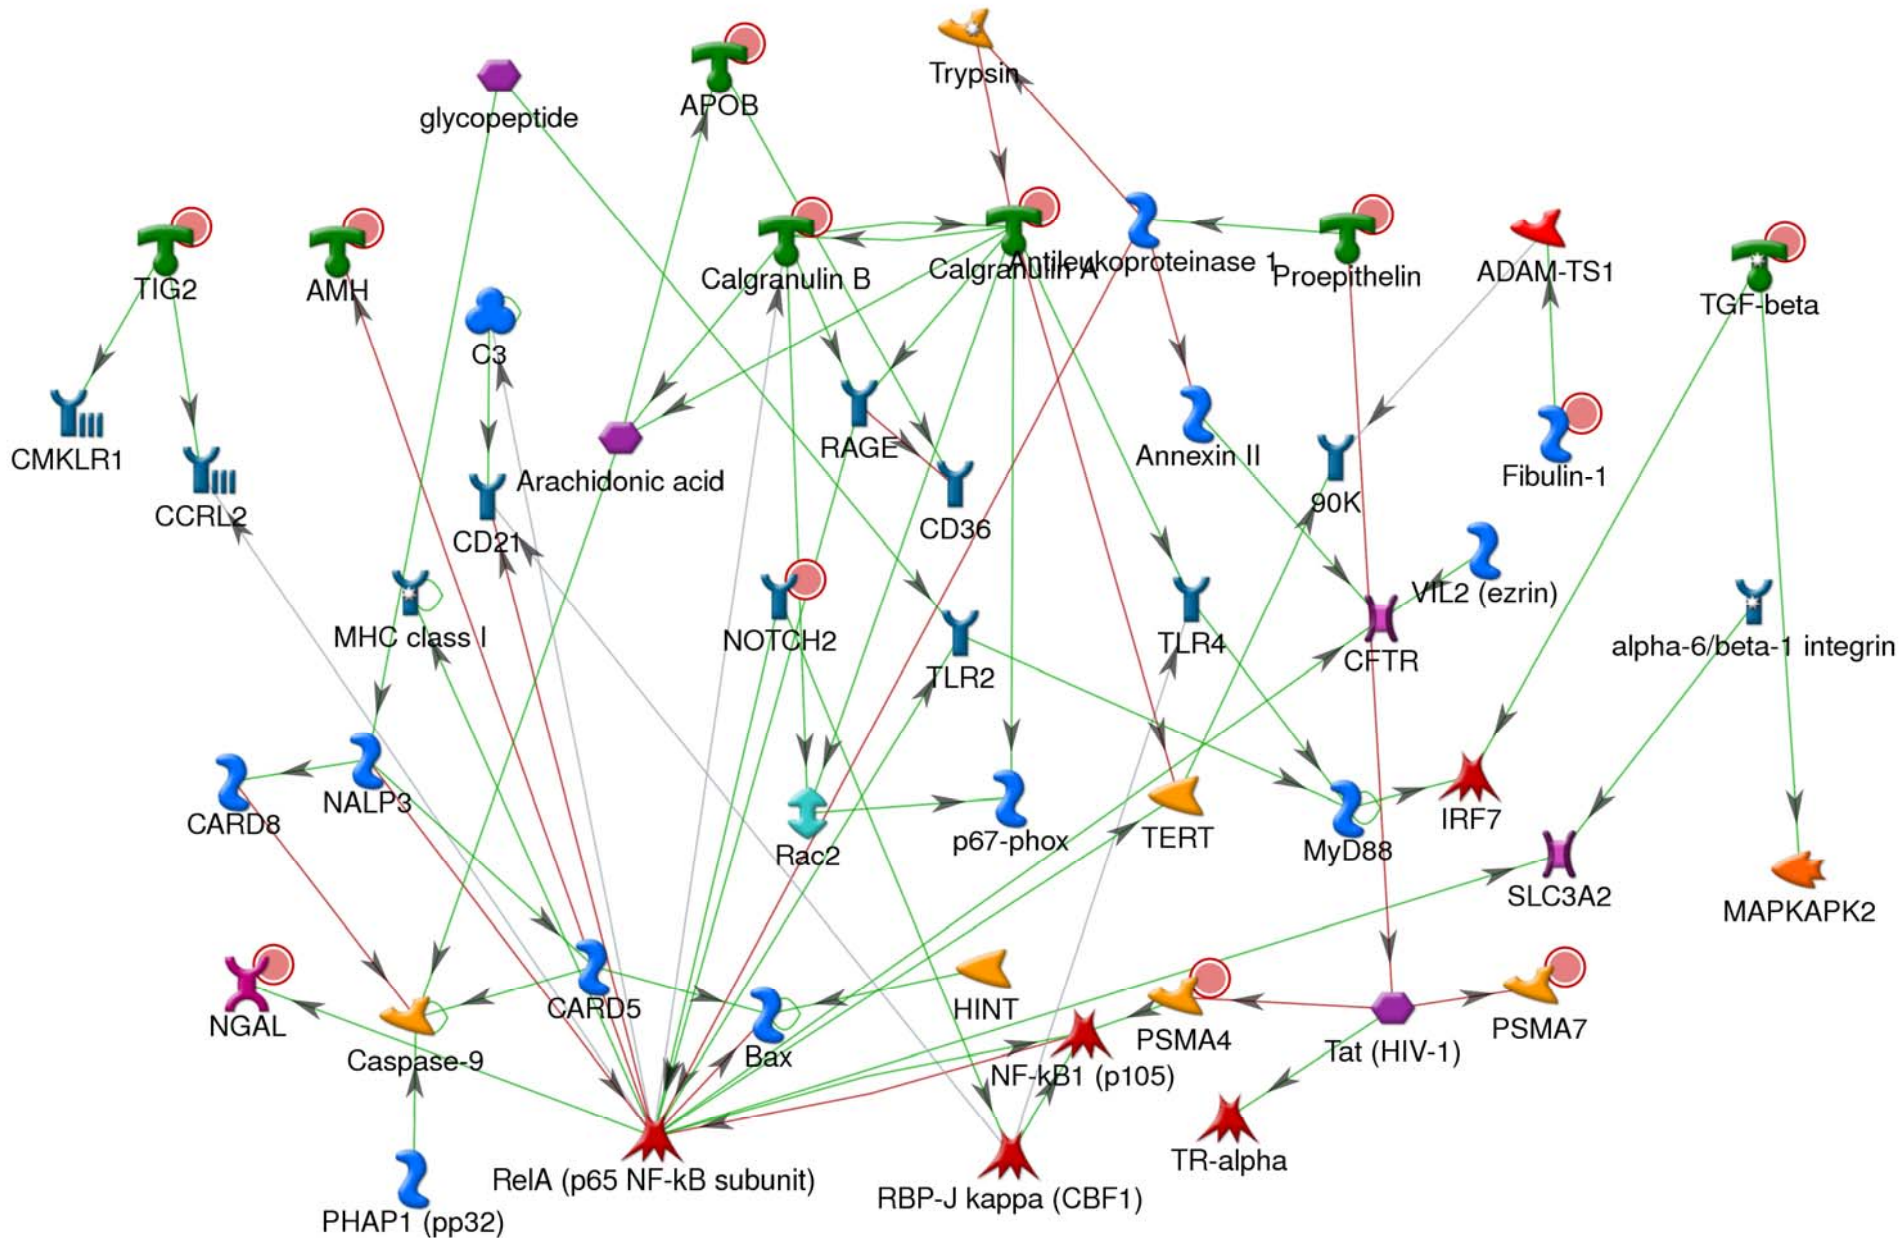

Figure S2D

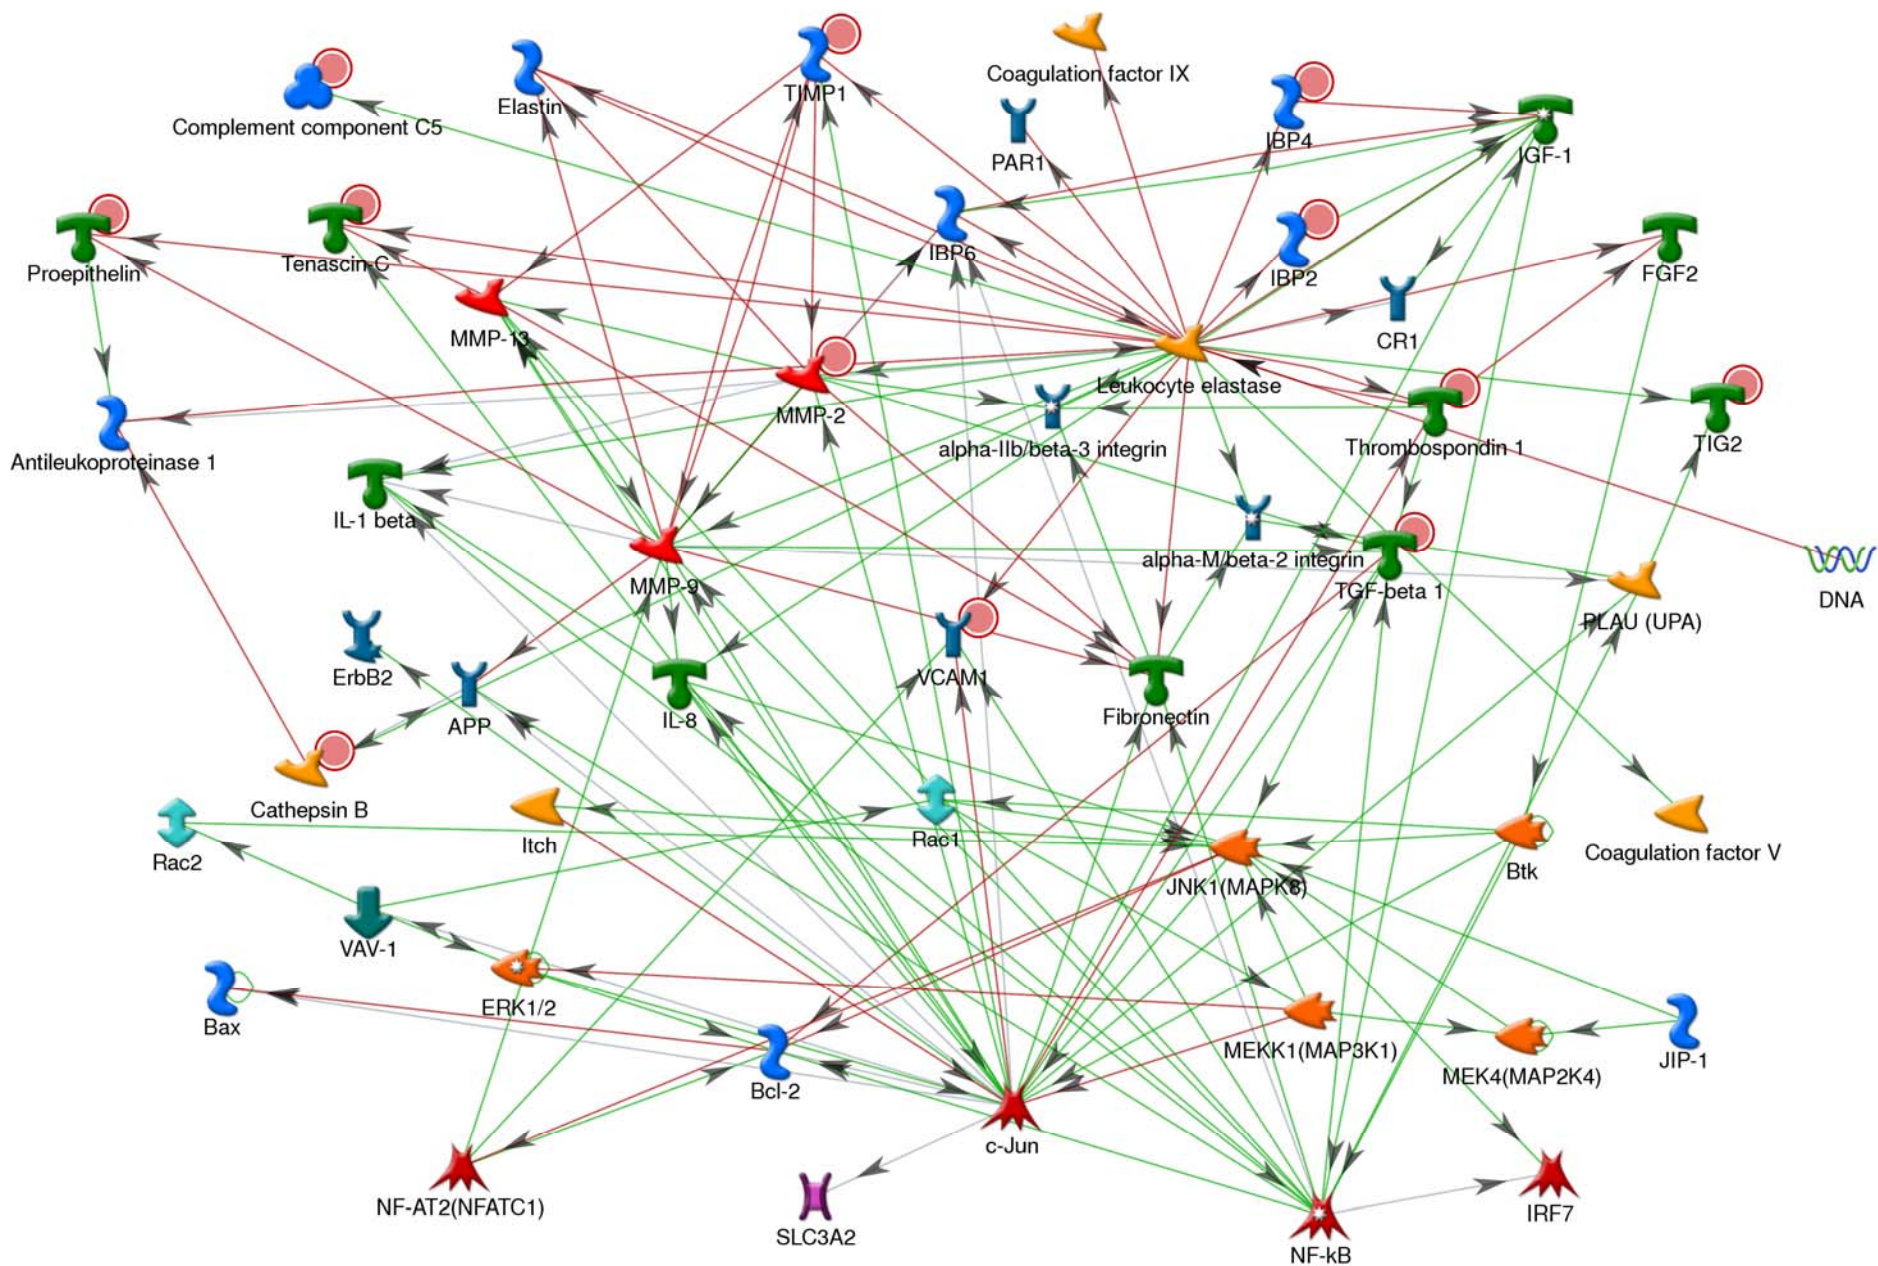



Figure S2E

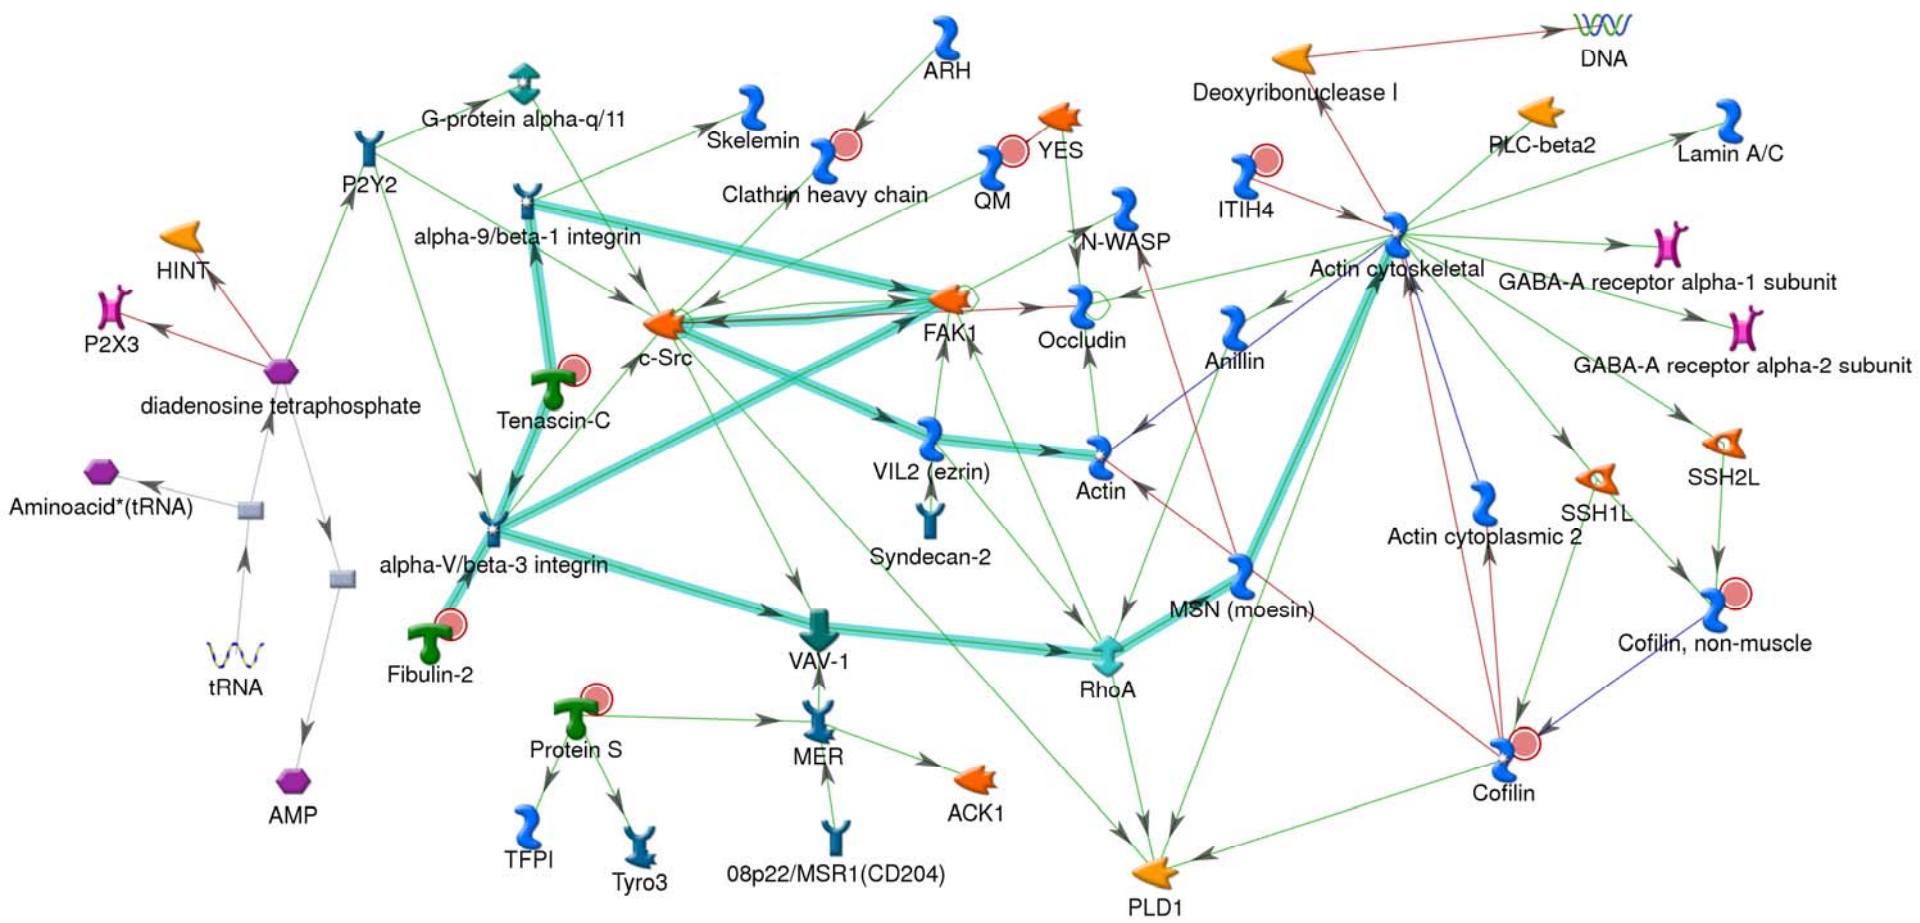

Supplement: S2 (10.1371/journal.pone.0007916.s002) [file journal.pone.0007916.s002]
