# Supplementary material for: Integrated Proteomic Analysis of Human Cancer Cells and Plasma from Tumor Bearing Mice for Ovarian Cancer Biomarker Discovery
Source: PLOS journal article supplement (doi:10.1371/journal.pone.0007916), 2009-11-19

Figure S4A

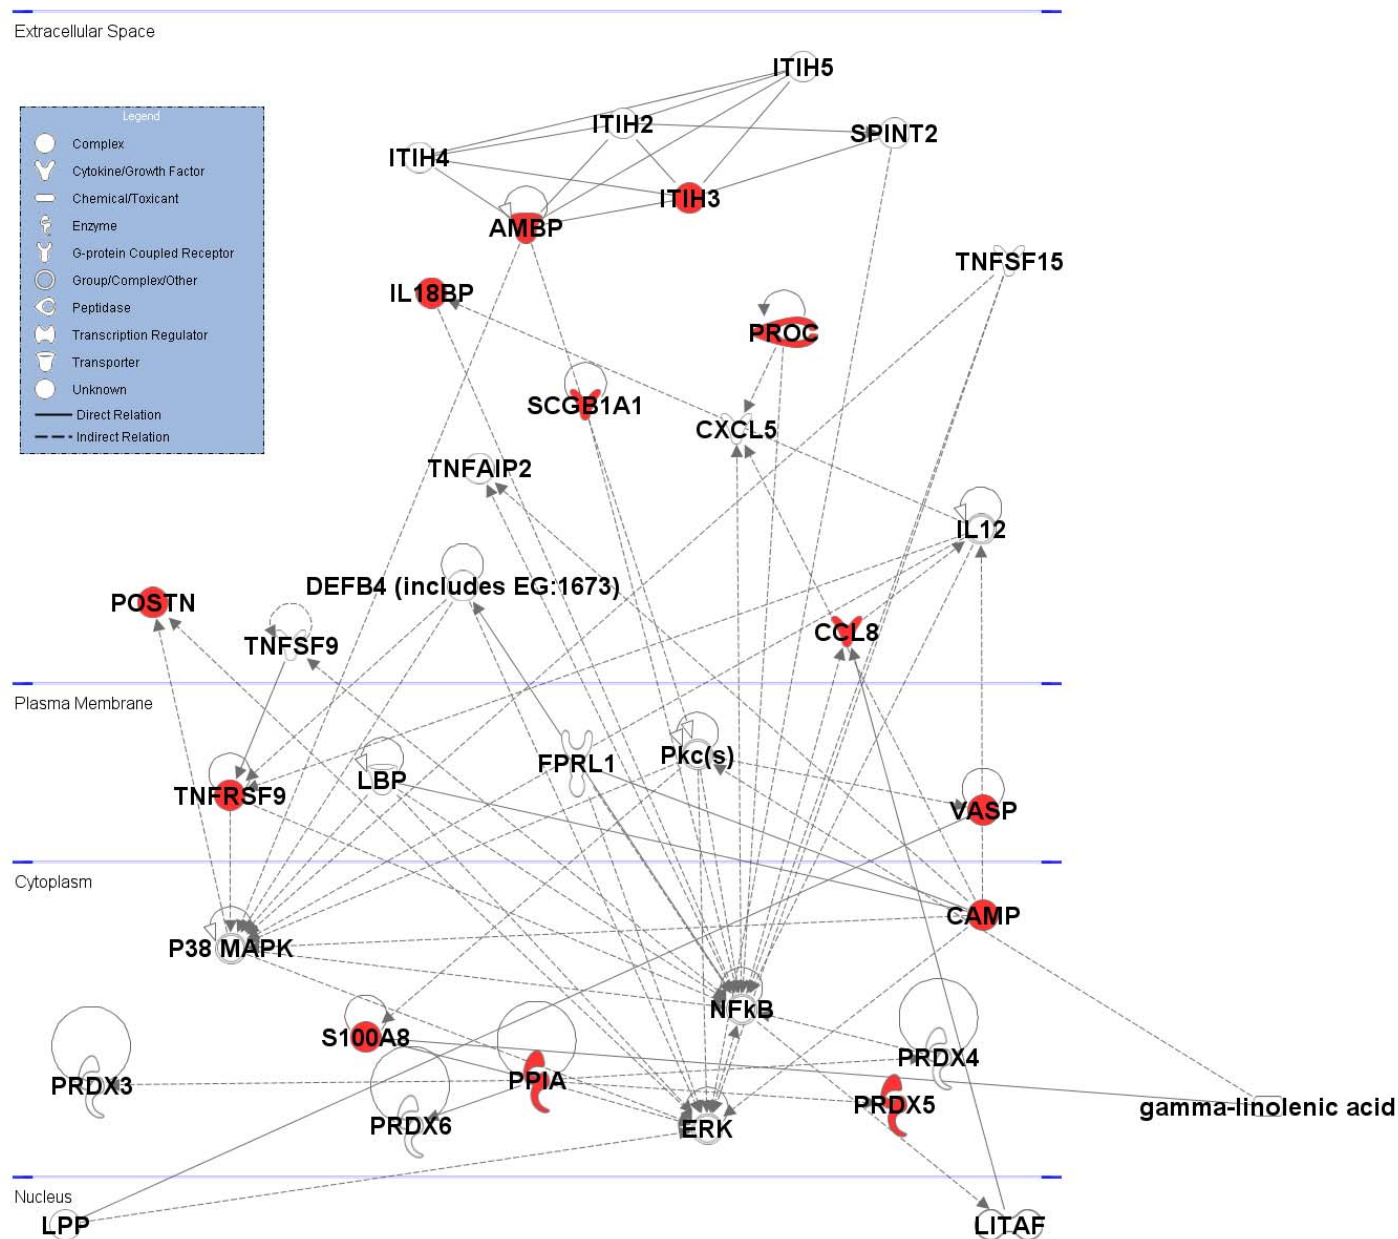

Figure S4B

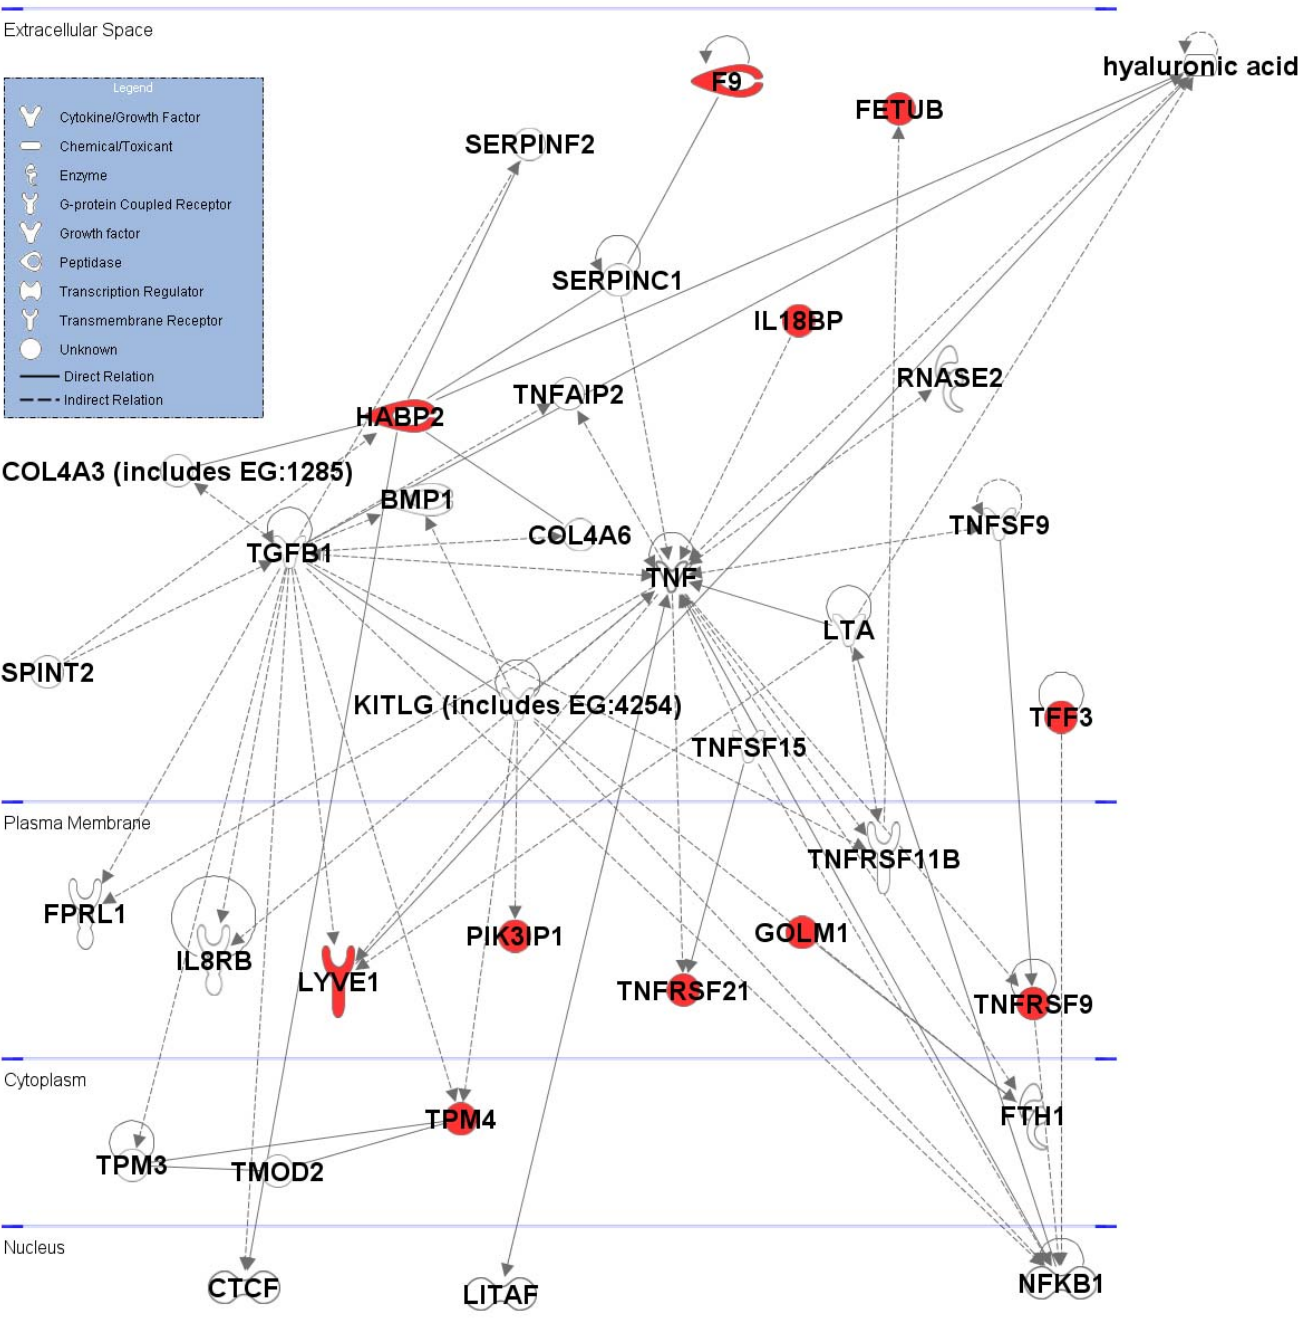

Figure S4C

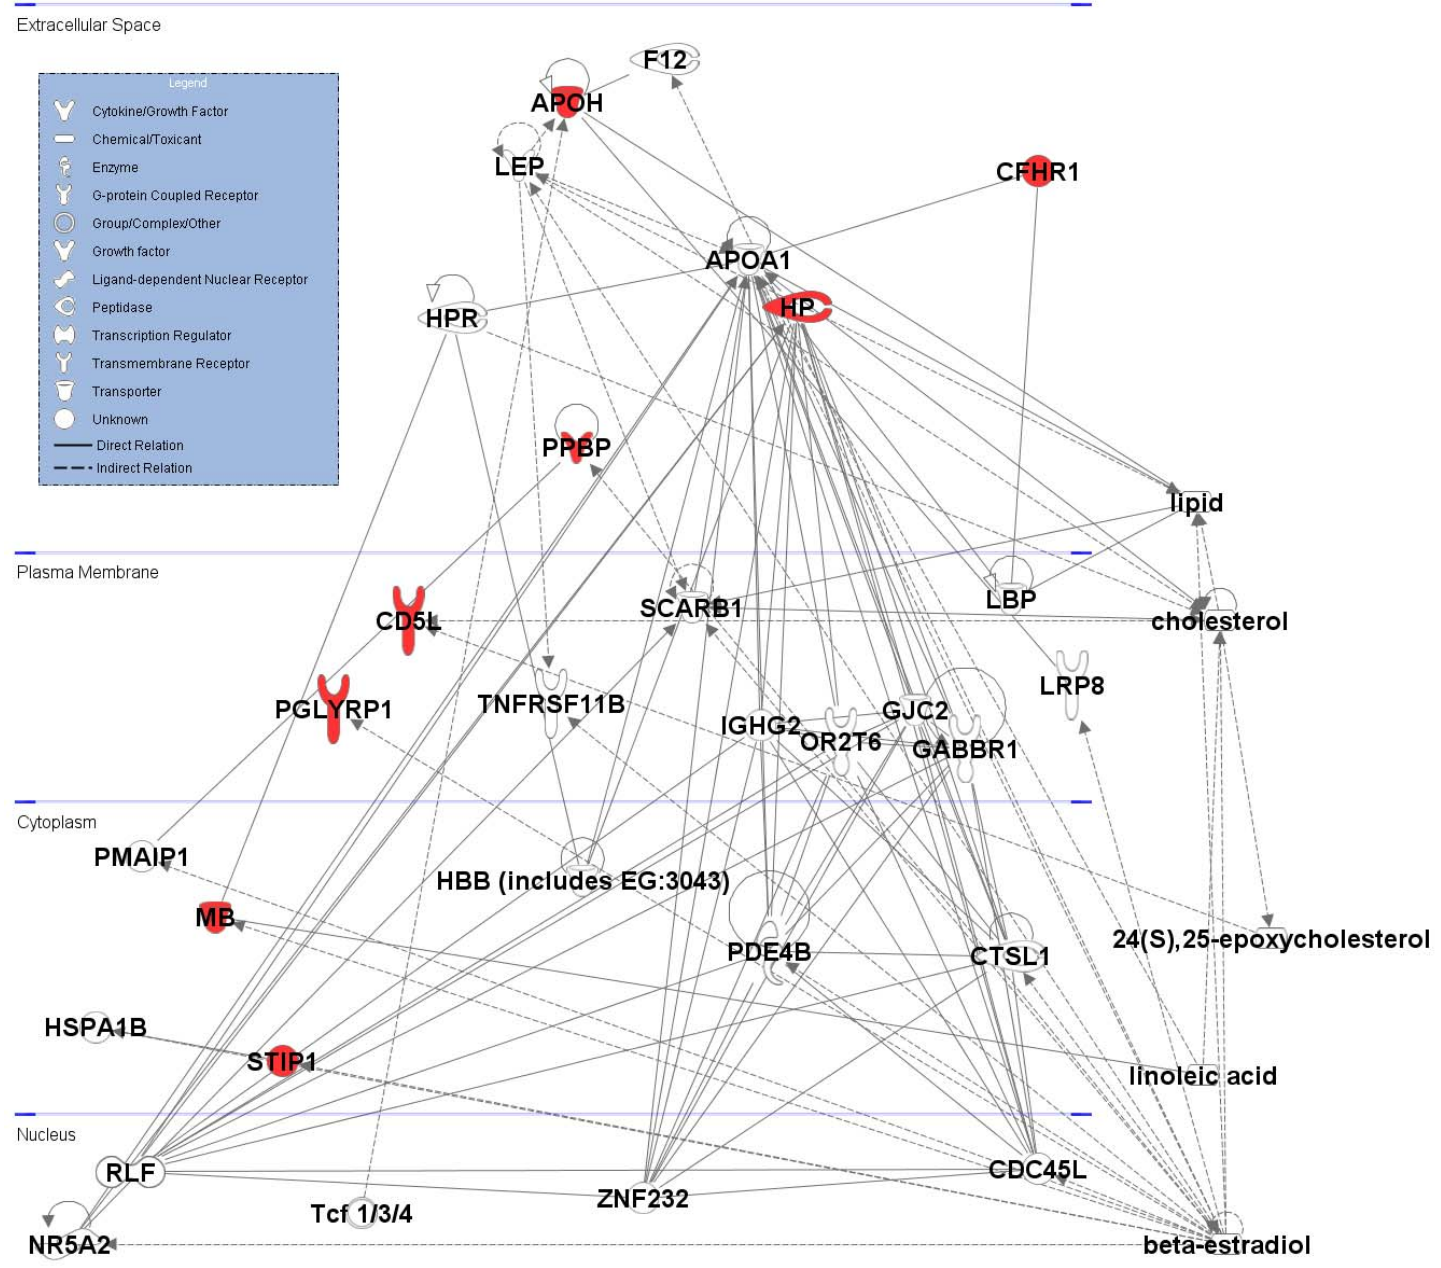

Supplement: S4 (10.1371/journal.pone.0007916.s004) [file journal.pone.0007916.s004]
