# Supplementary material for: Integrated Proteomic Analysis of Human Cancer Cells and Plasma from Tumor Bearing Mice for Ovarian Cancer Biomarker Discovery
Source: PLoS One. 2009 Nov 19;4(11):e7916. doi: 10.1371/journal.pone.0007916 (PMC2775948; doi:10.1371/journal.pone.0007916)
Supplement: Table S1 — Summary of all proteins identified in mouse plasma. (0.46 MB XLS) [file pone.0007916.s006.xls]

## Sheet: Sheet1
Table S1.						OVCAR3		CaOV3		ES2		ASCITES
ipi	gene	human ortholog	description	Protein Prophet Probability	Peptides Identified	Secreted / Total Extract	Surface / Total Extract	Secreted / Total Extract	Surface / Total Extract	Secreted / Total Extract	Surface / Total Extract	Secreted / Total Extract	Surface / Total Extract	liver
IPI00648294	0610025P10Rik	KIAA1787	novel protein.	1	CADDTMHILVDGEDMGPAAAGIAK+ESVCWGPPPAASPLKSCEYHALCSR+LGLTTLAPEDMGPGAGSGPGLPPSLPELR+LVSLSACGR+MAAGSGGSGGSGAGPGPGPGPGGGGGPGSSGPGLGSGGGLGGGGELHPR+VAGYAHGLVFSTK
IPI00225007	1100001G20Rik		wdnm1-like protein.	1	GDWDCGPEEQCVSIGCSHICTTN
IPI00624581	1110012J17Rik	KIAA0802	isoform 1 of uncharacterized protein kiaa0802.	1	APTPAAPRSPSLAGK+DHVPSTPTSPFGDSMESSTELR+EEGGESTPVR+GPAASVPLQEELKSAR+GRSPSPLGVGSETFR+LLADSHSLVMDLR+METLNGPAGGGAPDTKPQPAGQHHR+QDLSAPPGYTLTENVAR+QVVENQQLFRALKALLEDFR+SLYGDVDSPLPTGEAGGPPSTR
IPI00471080	1300017J02Rik		riken cdna 1300017j02 gene.	1	ADRDQYELLCMDNTR+CDQWSAVSGGALACATEETPEDCIAATMK+CLQDGTADVSFVK+CVNAPLEGYYVVAVVK+CVNAPLEGYYVVAVVKK+DKSSPFQLFGSPHGEDLLFTDAAHGLLR+DLLFSDDTECLSNLQNK+DQYELLCMDNTR+EDSIQELLR+EPYFGSWGALK+ETAAATFFSSSCVPCADGK+FDAFFSR+GEADAMSLDGGFAYVAGHCGLVPVLAENYLSTHSSGR+GLEDSQR+GLKHEDFELLCLDGTR+GTGFQLNQLR+HEDFELLCLDGTR+HLTVFEAMPTK+HPTVLQNTDGK+HPTVLQNTDGKNPEPWAK+ILFNQQELFGR+KGTGFQLNQLR+KMDISLYLGYEFLSAFR+KMSHPECIR+KPVTEAQSCHL…									YES
IPI00119016	1600029D21Rik	C11orf34	adult female placenta cdna, riken full-length enriched library,clone:1600029d21 product:hypothetical threonine-richregion/immunoglobulin and major histocompatibility complex domain/typei antifreeze protein containing protein, full insert sequence.	0.91	EDDSPVGTWSGTYEK
IPI00380195	1700012G19Rik	LOC283871	riken cdna 1700012g19 gene.	1	AVVVGFDPHFSYMK+FIFDCVSQEYGINPER+LGFGGPVGPEAGLEVFGTAYCSALYLR+MVPDFYVDSIADLLPALQG+TILTLTGVSSLEDVK
IPI00807805	1700120B06Rik	FAM92B	hypothetical protein loc436062.	0.94	EGEQGTSPPLVVMLVER
IPI00131673	1810009J06Rik		10 day old male pancreas cdna, riken full-length enriched library,clone:1810009j06 product:trypsin iv (ec 3.4.21.4) (pretrypsinogen iv)homolog.	0.98	IITFFTFLGAAVALPANSDDK+LGEHNIDVLEGGEQFIDAEK
IPI00169543	1810010M01Rik	LOC653808	zymogen granule membrane protein 16 precursor.	0.91	YGTVWSDYVGGTQGDLEEIFLHPGESVIQVSGK
IPI00654058	1810014F10Rik	C10orf125	isoform 5 of protein fucu homolog.	0.95	VLSPELLFALAR
IPI00121406	1810023F06Rik	FAM14A	putative isg12(b2) protein.	0.97	EQEPGLQDLQQEPK+QQETQETQETQELQK
IPI00228647	1810073N04Rik	MGC15523	adult male olfactory brain cdna, riken full-length enriched library,clone:6430510i23 product:hypothetical permeases for amino acids andrelated compounds, family ii containing protein, full insert sequence.	1	AEMLDHAVLLQVIQEQQVQQK+AGGALWKPVESAAESDAGGK+AGLPVQRPEAAEQR+DLADLPAGGSETEPQGAPIDLR+EAEQQGGDQAGSK+ELVPGDLEAVHK+GPVDVPGGEAPK+GQEEEAEHAGETLGDDPSQPLQPVLGAPR+GRPAPSQDMGQHLPGEVK+LLAVIEEQHK+LSVQDPVVVVAEDSQEK+QCGIVLGALLLVFCSWMTHQSCMFLVKSASLSKR+QEAAQLDRPGQGIAVPMGEAHR+QEGEEDKPKPADVQPEPGVAVLR+VPEANGQPPVQPR+VVVDEGQDQEGPEEK
IPI00454053	2010300C02Rik	C2orf55	hypothetical protein loc72097.	0.86	EAAEGLGEDGAGK+EPGPAVQDKAVVPPARPRPTQAATSGGPERTALGR+KTMGGDPQNSGDVGAGQAGPGK+MGPPPPGGLPIKR
IPI00131674	2210010C04Rik		trypsinogen 7.	1	IVGGYTCQR+VCKYVNWIQQTIAAN+YVNWIQQTIAAN
IPI00224184	2310020A21Rik	PSAPL1	hypothetical protein loc76943.	1	ECAKGSEVWCQDLQAAAKCR+FVAEYEPVLIESLK+SLPCSVCQDVAAAAGNGVNPGATESDILTSVMK+TPLLGTDQCVMGPSFWCK
IPI00467933	2310021P13Rik	KIAA0913	cdna, riken full-length enriched library, clone:m5c1031a15product:hypothetical atp/gtp-binding site motif a homolog.	0.93	AEGGTGEEHDLFAGLKPLEQESR+CQQAYMQYIHHR+DDLPSTDDSGSGLHKTK+DGLVIPLVELSAK+EGATSCSGSGMR+KQSAGPNSPTGGGGGGGSGGTR+KQSAGPNSPTGGGGGGGSGGTRTR+QSAGPNSPTGGGGGGGSGGTR+QSAGPNSPTGGGGGGGSGGTRTR+RASASGGAR+TSASHSSASGHTGR+VLGGTGSGGK
IPI00406503	2310033E01Rik		adult male tongue cdna, riken full-length enriched library,clone:2310043g11 product:x-ray repair complementing defective repairin chinese hamster cells 1, full insert sequence.	0.86	AGAEVPSAFYLYFLR+KSVNTFK
IPI00458515	2310040C09Rik	FAM83G	hypothetical protein loc69640.	0.8	ASVYMQPPIDGQPHIKEVVR+EPEPEPIVLPSVVPLVPTGTMAKK+HSEQMANGPGHPPRR+MLPDPGSPRPTR+MLPDPGSPRPTRNTR+NVISVLSGQVVEMFDR+QFQELYLMSQSVSLKDIPMEK+QLSAPHVTRGTFGGPLSSPLWAQGRSR
IPI00660087	2410089E03Rik	FLJ13231	2410089e03rik protein.	1	ADSESSKNPQATAASSGHEPLK+EGRLEFASMFDTVHAKDASK+ENWPWDSSLK+ERNPFCPTSSPFYMTSRQIR+ESDVDADCPAAVAAQEGTECWNR+GSLPSLGSFPESLLNYCK+LAHSVSGQGDAAPHFVGVSMDAAGITQGKQR+LPSGIAEKPLSPSPPHMAGHK+LPYLIISDGYMVTTLR+RAGLFGLK+SFAPASFPPAPAADSGLQLLFTPAAIQK+VVQCMAR
IPI00469517	2610016E04Rik		novel member of the major urinary protein (mup) gene family.	1	AGEYSVTYDGFNTFTIPK+DEECSELSMVADK+DEECSELSMVADKTEK+DGETFQLMGLYGR+DGETFQLMGLYGREPDLSSDIK+ENIIDLSNANR+EPDLSSDIK+EPDLSSDIKER+FAQLCEEHGILR+FHTVRDEECSELSMVADK+FHTVRDEECSELSMVADKTEK+INGEWHTIILASDK+INGEWHTIILASDKR+LFLEQIHVLEK+TDYDNFLMAHLINEK+TDYDNFLMAHLINEKDGETFQLMGLYGR									YES
IPI00109044	2900073G15Rik	MRCL3	myosin light chain, regulatory b-like.	1	EAFNMIDQNR+FTDEEVDELYR
IPI00229696	3110003A17Rik	C6orf115	similar to protein c6orf115.	0.96	CANLFEALVGTLK
IPI00283616	3110045G13Rik	PEAR1	platelet endothelial aggregation receptor 1.	1	CHLPCPEGFWGANCSNTCTCK+ESGYVEMKGPPSVSPPR+FGQDCAETCDCAPGAR+FTGQCHCAPGYIGDR
IPI00755357	3300001M20Rik	CGI-09	isoform 2 of trna.	0.89	MIVMETCSGLVLGAMMER+QWFYLDNAIGHSYGSAFDVSSGGSLQLR+TEMHGICLLTLR+VTFEKQWFYLDNAIGHSYGSAFDVSSGGSLQLR+YEAIVTILKPSTRILSIMYYAREPGK
IPI00110256	4121402D02Rik	LOC339287	riken cdna 4121402d02 gene.	0.93	AAALGGPEDESGAAEAHFLPR+EEPCGSISETVCK+EPGPPLASSQGGSPSPSPAGCGGGK+QAGIGGEPVAAGAGCSPRPK+SPLGGGGGSGASSQAACLK
IPI00652867	4632412N22Rik		hypothetical protein loc320159.	0.9	EFQARMEGVGKLLEYCK+ELVSQGLGTR+GSGALSEPAGMSSPR+MAPDIQMTGTTCPQQLD+MHKSLGGLVIPPIPK+MSGNGVLPGRGGNVR+QDLQDPGASAQEVQISR+RLSEGMAASSQASLDPVGGPR+VPAPVAVYCGSVPR
IPI00229031	4632417D23Rik		7 days neonate cerebellum cdna, riken full-length enriched library,clone:a730017h24 product:hypothetical serine-rich region profilecontaining protein, full insert sequence.	1	AMPLTEAVFR+ELPEEGTVHTQVAGTWVSR+GVSAALESLPESPSSSR+HRVLGCVWSFDLPK+ITPSQTESGTSLGFLER+LGITSMSVR+QASHPALEPGEPTVLSQK+RITPSQTESGTSLGFLER+RNSSGQEHSGPPFSWSQSHPPPSDHPSSSGSIK+SMLITDTYTNGVPR+SYAESSSSSSSTSSSESLDSSAPLR+TSTDAAESSALHPEAGGAGGLTQSSHAAQQPR+WPPPSLLLLLLLPLLLLPPAAPGAR
IPI00226497	4632419I22Rik		4632419i22rik protein.	1	DPWGGCSNQR+IETPYNPLGPNK+LAIGAPPGWDLEGYSDIQR+SWGCETSGEVYWKPSSSWDYIK+VTFTEPGKR+VTTPSTWWPDLFPDICK
IPI00224073	4732466D17Rik	FLJ32569	adult male kidney cdna, riken full-length enriched library,clone:f530005p20 product:hypothetical peptidase family m20/m25/m40containing protein, full insert sequence.	1	AFPTVFHSSLVQHEVVAK+GVQLAFLVDEGSFILEGFIPNLEKPVAMISVTEK+NGFIYGR+SFEPLPISPSDDQAMGYQLLQETIR+VSVQNYQNQVK
IPI00664640	4921511H13Rik		similar to nucleolar preribosomal-associated protein 1.	1	ACLDLMTAMVTQGPEAARDVCSSLDLNK+AMVRDLVHNFLMDLCCSR+ASEFVQEASTLQASMGK+ASEGPSSAASPAGTVK+DKHCYELCSR+DVCSSLDLNK+FLDSNALGLTVAALSSYDPQMR+FTVNKVALSTK+FVETQLLSNVISLLHTLWVTNLGNK+HPTLETWFLALEQKALPPHTLSPILVK+KASEGPSSAASPAGTVKR+LLYNHMK+LSELLHAVKEVDPGDWQQFVKTGLK+RAPAAFLVSLYVK+SKTLSSAHAAVSLVASWVLR+SVGPALLQSLLGLLK
IPI00620955	4930401A09Rik	FLJ25439	adult male testis cdna, riken full-length enriched library,clone:4930401a09 product:hypothetical tpr repeat containing protein,full insert sequence.	0.88	CLMIQSLVYGSEHIK+INQFINSK+NHKQAIQYLQQAYSICVSSFSEVSPQTAEASALLAK
IPI00458005	4930422G04Rik	LOC91431	prematurely terminated mrna decay factor-like isoform 2.	1	CLEVKPGDDLESER+EALPADGTLLSEFCDRTCVGFNSGPHGDVK+EDKLCFPVSSETK+ENSFVNVAEATFTLK+EPSGSSMLNLCEESGLSFDLGLEGQGGTPGGVSLLPK+FIPPAITSIKTK+HSDSLLASEPMR+ISDDIADMGSK+KQAFSLTLNQTCK+LIQSLMASGVESCMIGVITLYK+VLVSSSTNVAVDR+VWQDGVLKITHLGNK+YLITVEEAK
IPI00270806	4930590J08Rik	C3orf20	uncharacterized protein c3orf20 homolog.	0.85	CIVKAPLVSDLELERFLSAPR+EMAFDCLTGTVGK+EMAFDCLTGTVGKSCLSTAQLGK+MKAMVESASAGANPLDITKR+QPPPAPPPTLMPAATSGGK
IPI00752256	4932413O14Rik	FLJ25770	similar to citron.	0.86	CVXNFSTLWMXK+ELDTEISFLK+FTLPLTPEIIDFEEASGKK+NEDLLPSGITSK+QLVLANSELTEAR+QPASCLITLXKPTHR+SILVDFEEASGK
IPI00410795	4933425K02Rik	NHEDC1	adult male testis cdna, riken full-length enriched library,clone:4921513j18 product:hypothetical glutamic acid-rich region/na+/h+exchanger containing protein, full insert sequence.	0.96	AVMTVAFLAILITAPNGALLIGILGPK+DDGFQSSVTVEMSK+MSEHDVESNK+TIGMCLATLGLALSVR
IPI00136222	5430402E10Rik		6 days neonate head cdna, riken full-length enriched library,clone:5430402e10 product:similar to odorant-binding protein 1f.	1	AYFEHMECNDDCGTLK+ENIQHLAPTDTCNQ+NYFEVVMK+TLYIAADKVEK
IPI00221920	5730507A09Rik	KIAA0574	8 days embryo whole body cdna, riken full-length enriched library,clone:5730507a09 product:weakly similar to hypothetical proteinkiaa0574.	0.87	ERPHSLVESKAYADTR+HVVGTIRSMATSEEPRVEEAIFGAGVLDQL+SMATSEEPR
IPI00648961	5730593N15Rik		novel protein.	0.8	DQFTGQEMNVAQFLMHMGFDVQTVAQQQGMEPSK+LLGMLSNGN+VLLLAGSSAGGTGVLLNVDR
IPI00330037	5830457O10Rik	CTF8	adult male thymus cdna, riken full-length enriched library,clone:5830457o10 product:hypothetical protein, full insert sequence.	0.99	ACGLGPGLGPNPR+AGGLLGTGSGLNLR+AGVLSSGTGPPNPRPVGLGPGPSPNLR+ASGPLGPNPANFPRATGLQGPSPAAFPR+GLGLPGPNPSPMSR+LGGLPGPGPMANPR+LGGLPGPGPMANPRAGGLLGASPDPR+SAGPLGPGQVAFPR+SGMFPGPGLGPNPR
IPI00469618	6230416J20Rik	FAM29A	riken cdna 6230416j20 gene.	0.94	EISAECGSSFPQVVGSLLMSPGGPK+EPPTEDVSDLVNKK+LEEQICR+LVDEVAR+QHLWMYLQALGLDPSSSITFGGK+RSEPFQKEQAR+TTVPCSLGEFLPSLK+YQENVNLSVK
IPI00341975	6430598A04Rik	FLJ37538	riken cdna 6430598a04 gene.	1	EAAPTGPVGPGAVPGPGVR+LSMAGPGAETPPSK+RPASALPSRR+SGGGLAGPPLGSGGPTPPAAADSDSEDSEAIYEEMK+SSPHSGAMGSAAGVLHHR+STMAPRSLSCHSVGSMDSVGGGPGGGLTEDSSTR
IPI00340836	9530068E07Rik	C5orf15	keratinocytes-associated transmembrane protein 2 precursor.	0.94	DEEPEDINIAISK+MAASALGRMCGAAR
IPI00137320	9530077C05Rik	KIAA0895	riken cdna 9530077c05 gene.	0.85	KLCILTAIKPINLEK+KPSKSPSSSHSKDPSR+QSINIMELTLQK
IPI00464307	9830001H06Rik	C20orf117	hypothetical protein loc320706.	1	AAPGGAGALASAGLGVR+ACTGESWTQNTPNECIK+ADVALGSSGK+DHGGGGGPEAR+DSPVLRNINDGLSSLFSVVEHSGSTESVWK+EGVSEAELGGTGLK+ELYLLMEEEEMNAQHSDNK+KADVALGSSGK+MDAGSGPLR+RGTGPGSATACGTASSARPDK+SENDYLKDEIEELR+SLYGDLDAALSAEELADAPHSRETELKVHLK+TGQPPQPAQSGQQPPRPPASPDEPSVAASSVGSSR+VSKDISMRLHK
IPI00129965	A1bg	A1BG	alpha-1-b glycoprotein.	1	CGVEPPVDIHLPALNK+CTAPVSGLR+DAILYYVNLK+DAILYYVNLKELDNPGPFTCR+DLEPGSTVQLR+EGFKTPFAVASTR+ELDNPGPFTCR+EPLPRPLAHADPVDWITPGGLPVYVMCQVAMR+FSLGAITSNNSGIYR+GVTYLLR+IHGFSPTR+LETQVLSYR+LLFVGPQHAGNYSCR+MYASQAPPTLCLMGNYLMIYPQK+MYASQAPPTLCLMGNYLMIYPQKTYETLACK+NAAEFQLR+QEGVDGVQKPDVQHK+STVHLGQEAIFR+TPFAVASTR+TYETLACK+TYETLACKAPR+VFELIQNGWFLSQVR+VSMELVR+WTMLSNAVEVTGK+YMHVWSEDSKPVELMWSDETLQAPVLTAEPSSR+YTALPPFTFESG…						18.6714
IPI00454052	A2m	A2M	alpha-2-macroglobulin-p precursor.	1	DLKPAIVK+EDLTAAMLIVK+FSINTDDIMGTSLTVRAK+MVSGFIPLKPTVK+NALFCLDTAWK+VDLVFHPNIGLPATR+VVSLDENFHPLNELIPLLYIQDSK+YGAATFTR+YSAPCSAGYGNA	33.279	176.257	35.8344	115.86		160.042	0.800466	1.11114
IPI00468916	A630054L15Rik	FAM116A	2 days pregnant adult female oviduct cdna, riken full-length enrichedlibrary, clone:e230027k01 product:hypothetical protein, full insertsequence.	0.85	EAAALAAAGVALEDEEEDDGR+EAAALAAAGVALEDEEEDDGRR+SPNFDGWFK+THIDAIILALPDDLQGILLK+TLHLPIMGLVMK
IPI00112419	AB182283	KIAA0363	nascent polypeptide-associated complex subunit alpha-like proteinkiaa0363.	0.98	DIELVMAQANVTR+DNHSDIVNAIMELTM+FLDPDPAPSTLDR+GAVAVLATPSALTDR+SPGQGNGPKSATSQGAVETCR+VTPGILNLSPDNSAGDLLTTSQNR
IPI00624357	Abca12	ABCA12	hypothetical protein loc74591 isoform 3.	1	CCGSPFYLK+FQCIGSLQHIK+FSVGLDAVELLK+GLIAQVILPIVFVATAMGLGTLR+HKRVGTLSGGMK+KIIAVNNISLGIPAGECFGLLGVNGAGK+LEGFGLLLK+MMELFIK+SPNLDTNAICDTVAVTAMIQSHLPEAYLK
IPI00420146	Abca14		atp-binding cassette transporter sub-family a member 14.	0.86	EDYNLEDYSISQITLEQVFLTFANPDNPR+LCSSLGYINTIPSCK+MDSLQMK+MLTSFGLLQQSNTMSK+NITEMVK+NLETMLKAKK+NLILNSMLLLPIYNFGMSIYK+VVILDEPTSGMDPVSRR
IPI00132595	Abca4	ABCA4	retinal-specific atp-binding cassette transporter.	0.83	DRDPEEYGITVISQPLNLTK+EKLTMLPECPEGAGGLPPPQR+ELPGLVPGVCVK+IAIISQGR+LSTAIALTGCPPLLLLDEPTTGMDPQARR+NCFGTGFYLTLVR+QSLGMCPQHNILFHHLTVAEHILFYAQLKGR+VTEDAGAGSMFVGGAQQKR
IPI00554955	Abcc8	ABCC8	15 days embryo head cdna, riken full-length enriched library,clone:d930031b21 product:sulfonylurea receptor-1 homolog.	0.91	EVKPPEDLQDLGVR+FCLTGLLVILYGMLLLVEINVIR+FLQPFVNLLSK+LCAAFDAQARKDTQSQQGAR							3.47837
IPI00225355	Abi3bp		target of nesh-sh3 variant 1.	0.93	AGIVSSSRVTSPPLK+QEPVQFGEIGGHTQINYVQWYECGTTIPGK+QTTSMPPK+TGQQLTSEQLPTK	4.2279				8.42537		25.7837
IPI00134135	Acp1	ACP1	isoform 1 of low molecular weight phosphotyrosine protein phosphatase.	1	EDFATFDYILCMDESNLR+IELLGSYDPQK+QLIIEDPYYGNDSDFEVVYQQCLR+SPIAEAVFR+SVLFVCLGNICR	0.464509	1.27249		0.611862	1.44098		1.68702
IPI00473320	Actb	ACTB	bone marrow macrophage cdna, riken full-length enriched library,clone:i830072c08 product:actin, beta, cytoplasmic, full insertsequence.	1	AVFPSIVGRPR+CPEALFQPSFLGMESCGIHETTFNSIMK+DLTDYLMK+DLYANTVLSGGTTMYPGIADR+DSYVGDEAQSK+EITALAPSTMK+GYSFTTTAER+IWHHTFYNELR+LCYVALDFEQEMATAASSSSLEK+MTISLRWSSTTAPACAKPASR+QEYDESGPSIVHR+SYELPDGQVITIGNER+TTGIVMDSGDGVTHTVPIYEGYALPHAILR+VAPEEHPVLLTEAPLNPK+WSSTTAPACAKPASR	1.16793	1.28582	0.814974	0.623158	0.838694	0.84453	1.05215	0.552333
IPI00828613	Acvr1c	ACVR1C	activin a receptor type ic.	0.91	CSVGGVVEEYQLPYYDMVPSDPSIEEMRK+DLIYDATASGSGSGLPLLVQRTIARTIVLQEIVGK+KTISQLCVK+RCSVGGVVEEYQLPYYDMVPSDPSIEEMR
IPI00420440	Acyp1	ACYP1	acylphosphatase-1.	0.96	VIANLDYSDFQIVK
IPI00126140	Adam12	ADAM12	adam 12 precursor.	0.99	DLILSLER+GLIMFENKTYSLEPMK
IPI00123329	Adam15	ADAM15	isoform 4 of adam 15 precursor.	0.97	VVQDSPPMSLADVLQTGLPEALR	17.1395		5.97634		15.8507
IPI00128186	Adamdec1	ADAMDEC1	adam dec1 precursor.	1	HLLGPDYTETSYSPR+HSQDVKPCYYEGHIQNAR+IHNHAQLLSGASFRHGR+VGMAAGNSFCTTSSVSVIEAKK+VLNLLNMIYK+YAPEVQYQIILNGEEIVFHLK+YQIKPLQSTDEGEHAVLPYSWK							5.95675
IPI00130099	Adamts1	ADAMTS1	adamts-1 precursor.	1	GAFYLQGEEFFIQPAPGVATER+GPEVTSNAALTLR+GSLSAHMLLLLLASITMLLCAR+LQPDSGFLAPGFTLQTVGR+QDLCGSHTCDTLGMADVGTVCDPSR+RGSGGAKCGVMDDETLPTSDSRPESQNTR	78.4696				26.0513	7.32038
IPI00416064	Adamts13	ADAMTS13	adamts-13 precursor.	0.96	CSAGEQLLLWGR+GILTGAIFILGCWGLSDFQK+HMCWAVGESFIVSR+MPVQEELCGLASKPPSR+QQAAWVWTAKR+QYLEPTGTIHMR+VLPGGGVLLR+WEVSDPGPCMSSACEAGLDSR+WHISAWTECSVSCGDGIQR
IPI00331280	Adamts2	ADAMTS2	adamts-2 precursor.	1	AALDQTSGLPGGAAQDPGGR+ASSVALSNCDGLAGLIR+CGVCGGDNTHCK+ELCPGRWRAGSWSQCSVTCGNGTQERPVLCR+KVGCDGVIGSRK+LGSIMAPLVQAAFHR+MEEEEFFIEPLEK+QEDKCGVCGGDNTHCKVVK+RAALDQTSGLPGGAAQDPGGR+YLLTLMNIVNEIYHDESLGAHINVVLVR
IPI00672899	Adamts3	ADAMTS3	a disintegrin-like and metalloprotease (reprolysin type) withthrombospondin type 1 motif, 3.	0.9	CGDETAMGSVMAPLVQAAFHR+EIGSNKVEDKCGVCGGDNSHCR+QDFGPAGMQGYAPVTGMCHPVR
IPI00279302	Adamtsl4	ADAMTSL4	adamts-like protein 4 precursor.	1	ACSQEPCPPEQPDPR+DSSPLWSIFAPSIPAPNCSGESEQMR+HGPHMQPPEPRSHSAETPR+LVSGNLTDR+MPPSPGSWSSPQGAER+QECASGPPPPPSR+SCQGGMQTR+SRPPDMR+WASCSQPCGVGVQR			5.97634
IPI00311383	Adipoq	ADIPOQ	adiponectin precursor.	1	AVLFTYDQYQEK+DKAVLFTYDQYQEK+GEKGDAGLLGPKGETGDVGMTGAEGPR+GETGDVGMTGAEGPR+IFYNQQNHYDGSTGK+SAFSVGLETR+VTVPNVPIR
IPI00320687	Adrbk1	ADRBK1	beta-adrenergic receptor kinase 1.	0.88	GVAYDSSADWFSLGCMLFK+QFVLQCDSDPELVQWKKELR
IPI00130654	Afm	AFM	isoform 1 of afamin precursor.	1	AAPITQYLK+AAPQLPMEELVSLSK+ADTTYELPSVSALVSALHTDWCQPR+ANVGFLPPFPTLDPEEK+CWADNTLPECSK+DDRPEGLSLR+DLTTLLEDVSSMYEGCCEGDVVHCIR+DSDPDKFFAEFIYEYSR+EACIINANKDDRPEGLSLR+EECSEVQEPESCFSPESSK+FFAEFIYEYSR+FLVNLVK+FTAAREECSEVQEPESCFSPESSK+FTESENVCQER+FTESENVCQERDSDPDKFFAEFIYEYSR+HPDLSTPELLR+IGFKDLTTLLEDVSSMYEGCCEGDVVHCIR+KANVGFLPPFPTLDPEEK+LCFFYNK+QFQELGKDTLQR+RHPDLSTPELLR+RLCFFYNK+RLCFFYNKK+SLAMVQQECK+SQSQVVNH…
IPI00113163	Afp	AFP	alpha-fetoprotein precursor.	0.91	NPFMYAPAILSLAAQYDK+NVLSIATITFTQFVPEATEEEVNK+YGLSGCCSQSGVER
IPI00131231	Aga	AGA	n.	1	EQCDGTVGFGGSPDEGGETTLDAMIMDGTAMDVGAVGGLR+FAESMGFTNEDLSTK+FLPSYQAVEYMR+VGDSPIPGAGAYADDTAGAAAATGDGDTLLR	4.96685		5.97634		8.42537		1.98558
IPI00122231	Ager	AGER	advanced glycosylation end product-specific receptor precursor.	0.92	RPLNTAPIQLR+VYQIPGKPEIVDPASELTASVPNK
IPI00654069	Agt	AGT	angiotensinogen.	1	AAQVAMIANFVGFR+ATLLLIQPHCTSDLDR+ATLLLIQPHCTSDLDRVEALIFR+GSYNLQDLLAEDK+GSYNLQDLLAEDKLPTLLGAEANLNNIGDTNPR+HSFVQSLALFTPALFPR+LKHSFVQSLALFTPALFPR+LTLPQLEIR+MNLPLEGVSTDSTLLFNTYVHFQGTMR+NDLLTWIENPPPR+SLDLSTDPVLATEK+STCAQLENPSVETLPESTFEPVPIQAK+TLHDQLVLAAEK+TLHDQLVLAAEKLEDEDR+VEALIFR+VGEVLNSILLELK+VNNPQSVV		6.65346		35.7252		38.8672	2.97837	6.97034
IPI00162781	Ahcyl1	AHCYL1	putative adenosylhomocysteinase 2.	0.87	MSMPDAMPLPGVGEELK+QVVVCGYGEVGK+RTTDVMFGGK+RVVLLAEGR
IPI00553798	Ahnak	AHNAK	ahnak nucleoprotein isoform 1.	1	GDVDVSIPNIEGDLK+GPGVDLPSVDLSMPK+GPKVKGEYDVTMPK+LDIDTPDIDIHGPEGK+LKGPQITGPSLEGDLGLK+LPSGSGPASPTTGSAVDIR+MPDLHLKAPKISMPEIDLNLK+MPDMHFKAPKISMPDVDLNMK+MPEVNIKAPK+MPSLEVSVPK+MSGIDATTALSVGAPDVTLK+VDLETPSLDVHMESPDINIEGPDVK+VSMPDVELNLKGPK	1.73895	1.53836					0.583619	0.0146253
IPI00128249	Ahsg	AHSG	alpha-2-hs-glycoprotein precursor.	1	ANLMHNLGGEEVSVACK+AQNVPLPVSTLVEFVIAATDCTAK+CNLLAEK+CNLLAEKQHGFCK+ELACDDPEAEQVALLAVDYLNNHLLQGFK+EVTDPAKCNLLAEK+HAFSPVASVESASGETLHSPK+LFQTQPQPANANAVGPVPTANAALPADPPASVVVGPVVVPR+QLTEHAVEGDCDFHILK+QVLNQIDK+QVLNQIDKVK+RPFGVVYEMEVDTLETTCHALDPTPLANCSVR+TYHDLR+TYHDLRHAFSPVASVESASGETLHSPK+VGQPGAAGPVSPMCPGR+VGQPGAAGPVSPMCPGRIR+VMHTQCHSTPDSAEDVRK	101.065		15.929		38.1269	43.9162	0.595675		YES
IPI00405543	AI182371		novel anaphylotoxin-like domain containing protein.	1	AFTLCCNMAHQILENSTFK+FQNTAILTIQAK+IGPICVK+INEQASTYK+ISIMPTIDLQPEVEK+QEAHGMCLHQPTECLR+QKINEQASTYK+QLSEGQNSFSNSYLEVVSK+SVYTPQQPVK+TGTTYFEVK+VYSVNDDLEPATR+YNIHETCVQR+YSFSTVNLSPENK
IPI00625146	AI450948	AHNAK2	adult male spinal cord cdna, riken full-length enriched library,clone:a330043p19 product:hypothetical pdz/dhr/glgf domain/pdz domainprofile containing protein, full insert sequence (fragment).	0.99	EGDQLLSATIFFDHMK+ETRDMSPTSTDTEVHR+FGMTSGQSPDTSEQK+TDVESGASGYSVTGGGDQGIFVK
IPI00338844	AI851790	FAM19A2	tafa2 protein.	0.84	AAPSCVDASIVEQK
IPI00114254	AK129128	KIAA0372	hypothetical protein loc218343.	0.81	AAFLSPDDPAVWAGLMAACHADDK+AVDYVEQALGYFTR+EPTAESLQALCALGLAMR+LLCSIGDYDR+SGPGLIGLGIIALQDK+SGPGLIGLGIIALQDKK+YSEAIAQYQLIIK
IPI00135233	Akap10	AKAP10	isoform 1 of a kinase anchor protein 10, mitochondrial precursor.	0.94	GDEFLGGNVSLAAHGSVCLPEESHSGGSDGSTAQSSVK+KQPSHMEAAHFGDLGR+RLGDSSSAPLLVTQSEGTDLSSR
IPI00119149	Akap4	AKAP4	isoform 1 of a-kinase anchor protein 4 precursor.	0.96	AEMKGKDK+EIVSDLIDSCMK+GLMVYANQVASDMMVSVMK+GNGEDCR+QLDEAVGNMAR+QLDEAVGNMARK+RLVSALLGEKK+RPEEQCQDNAELDFISGMK+SEGELNLETLEEKEIIVIK
IPI00663880	Akap6	AKAP6	a-kinase anchoring protein alpha.	0.94	ANPSDTLDIEALLNCSIK+DLLSPESGSLVR+EKPEIPEASANLASNVK+ESETLNVIDPGLMDLNGMSEDALEWDETDISNK+GETIQDIDDWELSEMNSDSEIYPTYHIK+IQDTMAGHSGSGPR+LMKDIQHQDNYEAIWERIEVGFVNK+LNVDSHCALK+MLTMSVTLSPLR+QDSDGLKSLSNDAPSVAR+RRGVASILR									YES
IPI00623749	Akap9	AKAP9	a kinase (prka) anchor protein (yotiao) 9.	1	CGELELLANPSGTENAAVCPVQMSSYQAGLVMGK+DGFGLSPGIEK+DGIITQLTANLQQAR+EAPIPEPPSVEVGGCSGLTER+EEGETSADLFPKKIK+EHYVAIQLLTKECETLK+EINFKMDQITQSLCNLNK+EKGTLEQEVQELQLKTEQLEK+ENTIQSEQAHTLCSQNK+ESVHMTVHELGSDNLQPEDAPAQDVTKPLEK+KEEDLQAQISFLQEK+KMESMQCETDNLITQQNQLILENSK+LGAIQSGSTTQFHFGMR+QQIDGLQNEMNRK+RLGAIQSGSTTQFHFGMRR+RRLGAIQSGSTTQFHFGMR+SGFAGPVIDPENEELMLNISSRLQAAVEK+VDLAGNPDCSGPERK+VSSSGNQTLQILLR+WQQVTSTSSININR				3.67117
IPI00134743	Akp2	ALPL	alkaline phosphatase, tissue-nonspecific isozyme precursor.	0.87	LDGLDLISIWK+QALHEAVEMDQAIGK
IPI00466128	Akr1a4	AKR1A1	alcohol dehydrogenase.	0.98	ILQNIQVFDFTFSPEEMK+VICIPKSINPSR+YIVPMITVDGK
IPI00131695	Alb1	ALB	serum albumin precursor.	1	AADKDTCFSTEGPNLVTR+APQVSTPTLVEAAR+DDNPSLPPFERPEAEAMCTSFK+DVFLGTFLYEYSR+ENPTTFMGHYLHEVARR+ENYGELADCCTK+GLVLIAFSQYLQK+GLVLIAFSQYLQKCSYDEHAK+LGEYGFQNAILVR+LPCVEDYLSAILNR+LQTCCDKPLLK+LQTCCDKPLLKK+LSQTFPNADFAEITK+LVQEVTDFAK+RHPDYSVSLLLR+RPCFSALTVDETYVPK+TCVADESAANCDK+TVMDDFAQFLDTCCK+YMCENQATISSK+YNDLGEQHFK
IPI00221402	Aldoa	ALDOA	fructose-bisphosphate aldolase a.	1	ADDGRPFPQVIK+ALANSLACQGKYTPSGQSGAAASESLFISNHAY+CPLLKPWALTFSYGR+FSNEEIAMATVTALR+GILAADESTGSIAK+GVVPLAGTNGETTTQGLDGLSER+IGEHTPSALAIMENANVLAR+MPHPYPALTPEQK+QLLLTADDRVNPCIGGVILFHETLYQK+TVPPAVTGVTFLSGGQSEEEASINLNAINK+VDKGVVPLAGTNGETTTQGLDGLSER+VNPCIGGVILFHETLYQK+YASICQQNGIVPIVEPEILPDGDHDLKR+YTPSGQSGAAASESLFISNHAY	0.143213	0.325831	0.731141	0.217631	0.614102	0.115824	0.985877	0.47975	YES
IPI00127206	Aldob	ALDOB	fructose-bisphosphate aldolase b.	1	ALQASALAAWGGK+AMANCQAAQGQYVHTGSSGAAATQSLFTASYTY+ETTIQGLDGLSER+FPALTPEQK+IADQCPSSLAIQENANALAR+KYTPEQVAMATVTALHR+LDQGGAPLAGTNK+TVPAAVPGICFLSGGMSEEDATLNLNAINR+YTPEQVAMATVTALHR									YES
IPI00170205	Alms1	ALMS1	isoform 1 of alstrom syndrome protein 1 homolog.	0.95	EEEWLSESEDGYGSTDSLAAHVK+EGPSAYQEDLPDLTEEPLQILGVSEEVSSSSYQRK+EIQTLLMEAENMALKR+IIIESHEK+ISGSTEQTNVTTGSSSSYSVGEK+KTGAQIVSSSR+KVQTPGAPAGPSSSHFHK+QFTTAITFSSHEHSECISDSSGCK+TVTPTMSSSFLQK+VEGTEVPDLPSQEGGLPAQSQCPGKKPK+VPRISGSTEQTNVTTGSSSSYSVGEK+VQTPGAPAGPSSSHFHK+YPSPSCPEIASR						3.52448
IPI00125442	Alpk3	ALPK3	myocyte induction differentiation originator.	1	AESQEVADTGGLTSSSTLVPTMEVAGLSPRTSRR+DQDFPSSAPTLQLGPGSPTQSHPPEAMATSSEGACAK+EASGEADTLLRK+EVQAGQQALAAAQCSR+NLVTQRRVDMQVGQMQAGER+QWGCAGAPAAASSSEALQK+SSEQVYFSLKDMFMETTR								2.43785
IPI00127352	Ambp	AMBP	ambp protein precursor.	1	AFIKLWAFDAAQGK+CIQFHYGGCK+DCLQTCR+DSLLQEFK+ECKEYCGVPGDGYEELIRS+EDSCQLNYSEGPCLGMQER+EYCGVPGDGYEELIR+EYCGVPGDGYEELIRS+GVCEEITGAYQK+KEDSCQLNYSEGPCLGMQER+LWAFDAAQGK+TIAACNLPIVQGPCR+TIAACNLPIVQGPCRAFIK+WYNLAVGSTCPWLSR+YYYNGASMACETFQYGGCLGNGNNFISEK
IPI00720057	Amh	AMH	anti-mullerian hormone.	0.95	LLISLSEER+LPCCVPTAYAGK+YLVLTVDFPAGAWSGSGLILTLQPSR
IPI00315893	Amy1	AMY1A	alpha-amylase 1 precursor.	1	ALVFVDNHDNQR+IYVDAVINHMCGVGAQAGQSSTCGSYFNPNNR+TASGGIENYQDAAQVR+VADYMNHLIDIGVAGFR+VMSSYYWPR
IPI00125082	Ang1	ANG	angiogenin-1 precursor.	1	DVNTFIHGNK+HVVIACENGLPVHFDESFFSL+SPFQVTTCK
IPI00128206	Angptl3	ANGPTL3	angiopoietin-related protein 3 precursor.	1	ALEEQLTNLILSPAGAQEHPEVTSLK+FAMLDDVK+IYAIVQQSNYILR+KTGIQEPSENSLSSK+LDGEFWLGLEK+LNIFDQSFYDLSLR+QLSQQHMQIK+SFVEQQDNSIR+TGIQEPSENSLSSK
IPI00162831	Angptl6	ANGPTL6	angiopoietin-related protein 6 precursor.	1	AEPDLGAEPAAALGLLAER+AEPDLGAEPAAALGLLAERALDAEAEARR+LRLGQYHGDAGDSLSWHNDKPFSTVDR+QQGPPSSLLPTGHLAVPTRPVGPWR+SSEATQDSELATLR
IPI00753867	Ankrd35	ANKRD35	similar to ankyrin repeat domain 35.	0.8	AGEVQHSLSGNDSIAGHCGGGTSPQR+AHAAAFSSLEEQIR+ALATINPTLVPKR+GALSRPVLEGALGTPRAEAAAAAWEK+GLPQGYSIPASGRPGGR+GPGGXGGGAGAPGWR+GVSFETEQXQLAGGIGR+KALGTRGEPLGAPGK+XAAQATGLPDXRPPR
IPI00346041	Anks1	ANKS1A	isoform 2 of ankyrin repeat and sam domain-containing protein 1a.	1	CQDLISQTSSPLSQNDSCTGRSADLLLPSADTSR+GLTALDTVR+NDALTNVADSK+NGHKAVVQVLLDAGMDSNYQTEMGSALHEAALFGK+RLSSGFGGGGGGSGSGGGSGGGGLGSSSHPLSSLLSMWR+RVGLPAGLTALASR+SESLSNCSIGK+TDVVQILLAAGIDVNIKDNR+TLEQSVGEWLESIGLQQYESK+TMAASAASMIETK
IPI00117811	Ap3d1	AP3D1	ap-3 complex subunit delta-1.	1	KNLMEIVK+QELKQDNIAVKANAVCK+RVGYLAASQCFHEGTDVIMLTTNQIRK+VGYLAASQCFHEGTDVIMLTTNQIRK				3.67117		1.36224		2.43785
IPI00127754	Apbh		lacrimal androgen-binding protein eta.	0.84	LTGALVILGATLLLLTSGGDCGICPAIK+YKDDPETLENTEK
IPI00130238	Apc2	APC2	adenomatosis polyposis coli 2.	0.98	AAHTSLSNDSLNSGSTSDGYCTR+CQGNSLAVIESGGGILR+CSSVSSLGSFESR+EAGGEAAVAAK+EVGSMTALMECVLR+LVAQDGPMSLSR+MRANAALHNIVFSQPDQGLARK+QDSSPSPR+RGCMEAIVAQLGSESEELHQVVSSILR+RGSDGEARPLPR+RYAGMTLTNLTFGDVANK+SPLATPTGGPLPGPGGSLVPK+TLLAMSSSPESCVAMRR+TPSSSSSQTSPASQPLPRR+VLHVLEQIR+VPPFNYVPSPMAAATMASDSAVEK+YQAAAMAVSPGTCVPSLYVRK
IPI00309214	Apcs	APCS	serum amyloid p-component precursor.	1	APPSIVLGQEQDNYGGGFQR+DNELLIYK+DSPVNPNILNWQALNYEINGYVVIRPR+GMEEYLSPVHLCTTWESSSGIVEFWVNGKPWVK+GRDNELLIYK+GRDNELLIYKEK+KVFVFPR+SQSLFSYSVK+VGEYSLYIGQSK		46.2277				26.2448	4.21756	3.37571
IPI00129249	Aplp1	APLP1	adult male brain cdna, riken full-length enriched library,clone:3632445g23 product:amyloid beta (a4)-like protein 1, full insertsequence.	1	EALSGLLIMGAGGGSLIVLSLLLLR+EALSGLLIMGAGGGSLIVLSLLLLRK+GSTDQESSSSGR+HYQHVAAVDPEK+KKPYGTISHGVVEVDPMLTLEEQQLR+KPYGTISHGVVEVDPMLTLEEQQLR+QALNEHFQSILQTLEEQVSGER			5.97634
IPI00121209	Apoa1	APOA1	apolipoprotein a-i precursor.	1	ARPALEDLR+ARPALEDLRHSLMPMLETLK+ASETLTAQ+DFANVYVDAVK+DFANVYVDAVKDSGR+DFWDNLEK+DFWDNLEKETDWVR+DFWDNLEKETDWVRQEMNK+DLEEVKQK+DLEEVKQKVQPYLDEFQK+EDVELYR+ETDWVR+ETDWVRQEMNK+ETDWVRQEMNKDLEEVK+HSLMPMLETLK+HSLMPMLETLKTK+KWKEDVELYR+LAELKSNPTLNEYHTR+LQELQGR+LQELQGRLSPVAEEFR+LSPVAEEFR+LSPVAEEFRDR+QEMNKDLEEVK+QEMNKDLEEVKQK+QKLQELQGR+QKVAPLGAELQESAR+QKVQPYLDEFQK+QKVQPYLDEFQKK+SNPTLNEYHTR+THVDSLR+THVDSLRTQLAPHS…	10.6837	12.3069		3.0045		21.204	3.0199	6.88804	YES
IPI00111315	Apoa2	APOA2	apolipoprotein a-ii precursor.	1	AYFEKTHEQLTPLVR+QADGPDMQSLFTQYFQSMTEYGK+QADGPDMQSLFTQYFQSMTEYGKDLVEK+QADGPDMQSLFTQYFQSMTEYGKDLVEKAK+RQADGPDMQSLFTQYFQSMTEYGK+SAGTSLVNFFSSLMNLEEKPAPAAK+THEQLTPLVR+TSEIQSQVK+TSEIQSQVKAYFEK+TSEIQSQVKAYFEKTHEQLTPLVR				3.89489		3.52448		1.2919	YES
IPI00377351	Apoa4	APOA4	apolipoprotein a-iv precursor.	1	AAVLTLALVAITGTR+AEVTSDQVANVVWDYFTQLSNNAK+ALVQQLEQFR+ALVQQLEQFRQQLGPNSGEVESHLSFLEK+ANELKATIDQNLEDLRR+ATIDQNLEDLR+ATIDQNLEDLRR+EAVEQFQK+EAVEQFQKTDVTQQLSTLFQDK+EKVNSFMSTLEK+ENVDNLHTSMMPLATNLK+ENVDNLHTSMMPLATNLKDK+ENVDNLHTSMMPLATNLKDKFNR+GNTEGLQK+GSPDQPQALPLPEQAQEQAQEQAQEQVQPKPLES+KGSPDQPQALPLPEQAQEQAQEQAQEQVQPKPLES+KNAEELQTK+LGDASTYADGVHNK+LNHQMEGLAFQMK+LNHQMEGLAFQMKK+LQEHLKPYAVDLQDQINTQTQEMK+LQLTPY…	10.6837
IPI00775913	Apoa4	APOA4	apolipoprotein a-iv.	1	AAVLTLALVAITGTR+AEVTSDQVANVVWDYFTQLSNNAK+ALVQQLEQFR+ALVQQLEQFRQQLGPNSGEVESHLSFLEK+ANELKATIDQNLEDLRR+ATIDQNLEDLR+ATIDQNLEDLRR+EAVEQFQK+EAVEQFQKTDVTQQLSTLFQDK+EKVNSFMSTLEK+ENVDNLHTSMMPLATNLK+ENVDNLHTSMMPLATNLKDK+ENVDNLHTSMMPLATNLKDKFNR+GNTEGLQK+GSPDQPQALPLPEQAQEQAQEQAQEQVQPKPLES+KGSPDQPQALPLPEQAQEQAQEQAQEQVQPKPLES+KNAEELQTK+LGDASTYADGVHNK+LNHQMEGLAFQMK+LNHQMEGLAFQMKK+LQEHLKPYAVDLQDQINTQTQEMK+LQLTPY…	10.6837
IPI00331221	Apoa5	APOA5	apolipoprotein a-v precursor.	1	HQQVGWNLEGLR+MAAVITWALALLAVFASTQAR+NLDQLRDELSAFIR+QQLKPYTAELMEQVGLSVQELQEQLR+SLWDYFSQNSWSK+VVGEDTKAQLLGGVDEALNLLQDMQSR
IPI00350772	Apob	APOB	apolipoprotein.	0.87	ALQEGNFQTPVFIVPLTDLR+DGLSTSATTNLK+DVTTGQLSGESNMR+EVQVPTFTIPK+EVYGFNPEGK+GFEPTLEALFGK+GLPYPQTLQDHLNSLSELNLLK+GLVHPLSTLISSSQTCQYTLDPK+GMISLLEAMR+GTVPTEMSTER+HVSEAVCDEQHLFLPFSYK+IDFLNNYALFLSPR+INIDIPLPLGGK+ITDNDVLIAIDSAK+KGTVPTEMSTER+KHVSEAVCDEQHLFLPFSYK+KYVYNYEAESSSGVQGTADSR+LAAYLLLMK+LDHTHSLNIAGLSLDFFSK+LLLSGAQTLQGIPQMVVQAIR+LNDFSGVKI+LQEIFNTAK+LVLPPLELPVFHGPGNLFK+MLHEYANGLLDHR+NFVASHIANILNSEELYVQ…	4.2279	6.65346		94.4909		245.875	16.6366	20.2823	YES
IPI00666034	Apob	APOB	14 days pregnant adult female placenta cdna, riken full-lengthenriched library, clone:m5c1068h14 product:apolipoprotein b homolog.	1	ALQEGNFQTPVFIVPLTDLR+DGLSTSATTNLK+DVTTGQLSGESNMR+EEYFDPSMVGWTVK+EEYFDPSMVGWTVKYYEIEENMVELIK+EVQVPTFTIPK+EVYGFNPEGK+FTTILSSLQGFLER+GFEPTLEALFGK+GLVHPLSTLISSSQTCQYTLDPK+GMISLLEAMR+GTVPTEMSTER+HVSEAVCDEQHLFLPFSYK+IDFLNNYALFLSPR+INIDIPLPLGGK+ITDNDVLIAIDSAK+KGTVPTEMSTER+KHVSEAVCDEQHLFLPFSYK+KYVYNYEAESSSGVQGTADSR+LAAYLLLMK+LDHTHSLNIAGLSLDFFSK+LIVDHLNSLSELNLLK+LLLSGAQTLQGIPQMVVQAIR+LQEIFNTAK+LVLPPLELPVF…	4.2279	6.65346		94.4909		245.875	16.6366	20.2823	YES
IPI00119676	Apoc1	APOC1	apolipoprotein c-i precursor.	1	AWFSEAFGK+EFGNTLEDK+LKEFGNTLEDK+QKEILTK+TRAWFSEAFGK
IPI00136266	Apoc2	APOC2	apolipoprotein c-ii precursor.	1	SSAAMSTYAGIFTDQLLTLLR+TYPISMDEK
IPI00114099	Apoc3	APOC3	apolipoprotein c-iii precursor.	1	AEEVEGSLLLGSVQGYMEQASK+FTDKFTGFWDSNPEDQPTPAIES+FTGFWDSNPEDQPTPAIES+GWMDNHFR+TVQDALSSVQESDIAVVAR	4.2279					8.57344		6.08475
IPI00118994	Apoc4	APOC4	apolipoprotein c-iv precursor.	1	DRWQWFWGPGAVQGFMQTYYEDHLK+TQAWLQSSR+VLEMVEPLVTR+WQWFWGPGAVQGFMQTYYEDHLK						13.6224
IPI00314309	Apod	APOD	apolipoprotein d precursor.	1	CPSPPVQENFDVK+CPSPPVQENFDVKK+DILTSNGIDIEK+ELSPDGTMNQVK+GNCIQANYSLMENGNIEVLNK+MTTTDQANCPDFL+MVTMLMFLATLAGLFTTAK+NPYLPPETITYLK+WYEIEKIPASFEK								3.84463
IPI00323571	Apoe	APOE	apolipoprotein e precursor.	1	AYKKELEEQLGPVAEETR+DRLEEVREHMEEVR+EHMEEVR+ELEEQLGPVAEETR+ERLGPLVEQGR+FWDYLR+GRLEEVGNQAR+GWFEPIVEDMHR+IQASVATNPIITPVAQENQ+KELEEQLGPVAEETR+LEEVGNQAR+LEEVREHMEEVR+LGADMEDLR+LGADMEDLRNR+LGPLVEQGR+LGQYRNEVHTMLGQSTEEIR+LGQYRNEVHTMLGQSTEEIRAR+LKGWFEPIVEDMHR+LQAEIFQAR+MEEQTQQIR+NEVHTMLGQSTEEIR+NEVHTMLGQSTEEIRAR+QWANLMEK+SKMEEQTQQIR+TANLGAGAAQPLR+TANLGAGAAQPLRDR+WVQTLSDQVQEELQSSQVTQELTALMEDTMTEVK	4.11821	4.32343	13.0535			230.728	6.14809	6.81413	YES
IPI00126202	Apof	APOF	apolipoprotein f.	1	DGAIDLGYDLLMAMVGASGGPAGAVITAALKPAMK+EVSVDALSSALQLLAWEQPGPK+LGGVEATQALIHHLQELQK+LIQYYYDEK+NALEAAGCQAEVWALQLQLYR+SGHTDREVSVDALSSALQLLAWEQPGPK+SLPGFTYMPPVSK						8.57344
IPI00322463	Apoh	APOH	beta-2-glycoprotein 1 precursor.	1	ATFGCHETYK+ATFGCHETYKLDGPEEAECTK+ATVLYQGMR+CPFPPRPENGYVNYPAKPVLLYK+CSYTVEAHCR+CSYTVEAHCRDGTIEIPSCFK+CTEEGKWSPDIPACAR+DGTIEIPSCFK+DGTIEIPSCFKEHSSLAFWK+DGTIEIPSCFKEHSSLAFWKTDASELTPC+DKATFGCHETYK+DKATFGCHETYKLDGPEEAECTK+DYRPSAGNNSLYQDTVVFK+EHSSLAFWK+ESCKLPVK+FTCPLTGMWPINTLR+ICPKPDDLPFATVVPLK+IHFYCK+IQEQFKNGMMHGDK+IQEQFKNGMMHGDKIHFYCK+ITCPPPPVPK+KATVLYQGMR+KCSYTVEAHCR+LDGPEEAECTK+LDGPEEAECTKTGTWSFLPT…							0.64197		YES
IPI00650075	Apoh	APOH	apolipoprotein h.	0.85	ICPKPDDLPFAT							0.64197		YES
IPI00130382	Apom	APOM	apolipoprotein m.	1	AFLVTPR+CVEEFQSLTSCLDFK+FLLYNR+TDLFSSSCPGGIMLK						6.04896
IPI00121240	Apon		apolipoprotein n.	1	HLVPSPGDMR+LMSSPELK+LPPIDLVR+MIQAALLLGCILLSPVTAFPWK+SVTLPEACTYEPGWVLYDMAQVLLETANK+VYLVAQLAVVLK+VYLVAQLAVVLKR
IPI00117914	Arg1	ARG1	adult male liver tumor cdna, riken full-length enriched library,clone:c730019n20 product:arginase 1, liver, full insert sequence.	1	DHGDLAFVDVPNDSSFQIVK+TGLLSGLDIMEVNPTLGK+VMEETFSYLLGR									YES
IPI00322312	Arhgdia	ARHGDIA	rho gdp-dissociation inhibitor 1.	1	AEEYEFLTPMEEAPK+SIQEIQELDKDDESLRK+VAVSADPNVPNVIVTR	0.674954	0.375222	2.02387		1.08458	0.324343	1.76638
IPI00420572	Arid1b	ARID1B	at rich interactive domain 1b.	1	EIGGLAQVNK+ELATNLNVGTSSSAASSLK+ELATNLNVGTSSSAASSLKK+EMSMALLSNLAQGDTLAAR+HMDGMYGPPAKR+LVLETLCK+NSMTPNAPYQQGMGMPDMMGR+QGPGGPAQAPPYPGMNRTDDMMVPEQR+QPYMSSSASMQPITRPPQSSYQTPPSLPNHISR+RPIQGQYPYPYNR+SSPALAAPDASVDPK
IPI00124829	Arpc3	ARPC3	actin-related protein 2/3 complex subunit 3.	0.97	LIGNMALLPLR	0.264244	1.12252		1.26847
IPI00553465	Ash1l	ASH1L	probable histone-lysine n-methyltransferase ash1l.	0.99	AGQFIIEYLGEVVSEQEFR+EDGSTDAQQQFSVK+EHRSEQPQVSMDSGSSRSVLESLK+EKLEYTPGEHEYGLFPAPIHVGK+ETNFSEGNLK+ISSSLGKKPSLTSDSGIHAITPSVVNFTSLFSNKPFLK+KIVASSAMGLVNK+KPEESSQEAQLASTPEER+KPGVGSIAGIIHK+KPMFNAAVGLINKDSVK+LAAAEENLEVARAARLAQIFK+LGTGTTVGLVSK+LSSSMCVTSDLLSDIYKPK+LTDSPGLFPVQDTALNRPHR+QARKMCNYDK+QSVCSMSDLEMEPDKK		20.2871		33.054		6.8112	3.47837
IPI00281565	Asxl1	ASXL1	putative polycomb group protein asxl1.	0.98	EDQGPTIPSESSSGR+EGHSLSQGSDPGAAPGQCLGDHTTSK+EMRSGTSPLACLNAMLHSNSR+ESILAQSYGASAGLVR+ESILAQSYGASAGLVRAMASK+ETATTAIGGGGGPGGGGSGAIDEGGGR+GARGYHCNRETATTAIGGGGGPGGGGSGAIDEGGGR+GYHCNRETATTAIGGGGGPGGGGSGAIDEGGGR+TGGVAASQSWVSR
IPI00331397	Asxl2	ASXL2	adult female vagina cdna, riken full-length enriched library,clone:9930017f14 product:hypothetical glycine-rich region/serine-richregion/alanine-rich region containing protein, full insert sequence.	1	AAAAAAAAAAAAASVGGTIPGPGPGGGQSPREGGERK+EIRQSVGTSPLACLNAMLHTNSR+HPHHGEASSTNDCLASK+KALKQALK+KIAGGGSAGSDPVSTNGK+LSHPPSPPSGCPSPTIPASK+QVGPDGLMK+RTHSVNPDDR+RTSKPAMAGHYLLNISTYGR+TTAPAPLDMTSSPVTTASLEK+TVKAASDSVPAKPGQMK+VPPLKIPVSRISPMLFSTSQVSPR
IPI00278602	Atf6	ATF6	activating transcription factor 6.	0.98	AEPQPLSPASSSCSISSPR+DTSDGDNQK+KEYMLGLEAR+RGDTFYVVSFR+TQTNASVPAK
IPI00330303	Atic	ATIC	bifunctional purine biosynthesis protein purh.	1	LSGVSVSSDAFFPFR+WEALFEEVPELLTEAEKK	0.914364	0.696215	0.132808	0.2003	0.409353	0.282611	1.91312		YES
IPI00117379	Atox1	ATOX1	copper transport protein atox1.	1	LGGVEFNIDLPNKK+VCIDSEHSSDTLLATLNK	3.3529		1.82545		3.03682		1.73919		YES
IPI00130280	Atp5a1	ATP5A1	atp synthase subunit alpha, mitochondrial precursor.	1	AVDSLVPIGRGQR+ILGADTSVDLEETGR+ISEQSDAK+YTIVVSATASDAAPLQYLAPYSGCSMGEYFR	1.25589	1.28026	0.277624	0.897192	0.0794847	0.557199	0.714261	0.664651	YES
IPI00128989	Atp6ap1	ATP6AP1	vacuolar atp synthase subunit s1 precursor.	1	EVLTGNDEVIGQVLSTLK+LSIEDFTAYGGVFGNK			10.286	3.0045	38.1269		1.15946	3.68833
IPI00830169	Atp7a	ATP7A	atpase, cu++ transporting, alpha polypeptide.	0.85	CYIQVSGMTCASCVANIER+EEGIYSVLVALMAGK+KELDTETLGTCTDFQVVPGCGISCK+QIEAVGFPAFIKK+SMGLEVVLMTGDNSK+SPSEISVHVGIDDTSR+TKGVTGVKISPQQR
IPI00471005	Atp9b	ATP9B	atp9b protein.	0.94	AAYYSSAGPGPGADR+ALFLALVVLSVVMVTLQGFAGPWYR+EMELLCLTGVEDQLQADVRPTLEMLR+GEAHLELNAFRR+HDCALVISGDSLEVCLR+QASLAADFSITQFR+RAAYYSSAGPGPGADRR+TCAIGDGGNDVSMIQAADCGIGIEGK
IPI00322707	Atrx	ATRX	transcriptional regulator atrx.	0.95	ANLSSDEDGSSDDEPDGGGKK+EHIVGYHEHDSLLDHK+EVKSASSSSDAEGSSEDNKK+GEDGLHGIVSCTACGQQVNHFQK+GMYQSVAGGMQPPPLQR+KDSSSSGSGSDNDVEVIK+KEEDSSEDEK+LTLSDGESGEEKPTKPK+QAADNSEMTSAMKLCQLKSFK+QPVIGDQNSDSDEMLAVLK+QSEESPADDGELRR+RDTPMLPK+RQTESNPAMSNSDEESNGTMK+TTQEGSSADDTGDTEGR
IPI00118471	Avp	AVP	vasopressin-neurophysin 2-copeptin precursor.	1	AISDMELR+CAAVGICCSDESCVAEPECHDGFFR+CFGPSICCADELGCFVGTAEALR+CQEENYLPSPCQSGQKPCGSGGR+EPSNATQLDGPAR+QCLPCGPGGK
IPI00137987	Azgp1	AZGP1	zinc-alpha-2-glycoprotein precursor.	1	AEPVGPWSQVEGMEDWEK+AEPVGPWSQVEGMEDWEKESQLQR+AKAYLEEECPEMLKR+AREEIFLVTLK+AREEIFLVTLKDIMDYYK+AYLEEECPEMLK+AYLEEECPEMLKR+CLAYGFYPQR+DENNVVAQPQ+DIMDYYK+EEIFLVTLK+EIPAWIPLDPAAANTK+FQATAFLNDQAFFHYNSNSGK+GFSQSLSVQWDR+IDPPTVTITSR+ISLHWNK+KVKDENNVVAQPQ+LAFEPER+SHLDRIDPPTVTITSR+VKDENNVVAQPQ+YAYDGEDFIEFNK+YAYDGEDFIEFNKEIPAWIPLDPAAANTK								1.77119
IPI00409923	B230339M05Rik	KIAA1219	novel protein.	0.95	DYALNTDSAAGLLIR+EPNPASMR+EVPVIFIHPLNTGLFR+LFVPEPRPVPK+QDMSISLAALELLSGLAK+QLEPEFYTALFQEVGLK+QTVINICR
IPI00109966	B2m	B2M	beta-2-microglobulin precursor.	1	DWSFYILAHTEFTPTETDTYACR+HDSMAEPK+HPPENGKPNILNCYVTQFHPPHIEIQMLK+TPQIQVYSR+TVYWDR+TVYWDRDM+VEMSDMSFSK+VEMSDMSFSKDWSFYILAHTEFTPTETDTYACR+VKHDSMAEPK	15.4159	0.554455	12.4793	1.16857	62.2114	10.4313	5.27296		YES
IPI00331286	B2m	B2M	beta-2-microglobulin.	1	DWSFYILAHTEFTPTETDTYACR+HASMAEPK+HPPENGKPNILNCYVTQFHPPHIEIQMLK+TPQIQVYSR+TVYWDR+TVYWDRDM+VEMSDMSFSK+VEMSDMSFSKDWSFYILAHTEFTPTETDTYACR	15.4159	0.554455	12.4793	1.16857	62.2114	10.4313	5.27296		YES
IPI00131464	B4galt1	B4GALT1	isoform long of beta-1,4-galactosyltransferase 1.	1	FDGLNSLTYK+FGFSLPYVQYFGGVSALSK+GMSISRPNAVVGR+QQLDYGIYVINQAGDTMFNR+VAIIIPFR+YWLYYLHPILQR	49.4185		95.5504	17.027	8.42537		0.695675
IPI00396779	Bahcc1	BAHCC1	kiaa1447.	1	APVHPLPMGLALR+AVAAAAAAAGGK+EAPAGPPVGQK+ELLLQDNK+EPGLVLHPGSGVAVLGPSPSSVVK+GLEYLSSGPEAPFPGLPK+HLDAAMATDHGAPYGVSYAHLK+HMELEEAAQEKTPKSTHKPVALTPMAK+KAANEGHPPSEAPTPSLSPK+KSCGQAELPSSVAHKVAQLKPK+KSVELASLGYSGHHMPPWGVQTGHDTSMAIIEER
IPI00319528	Bai2	BAI2	isoform 1 of brain-specific angiogenesis inhibitor 2 precursor.	0.99	CQMGVCRADESEDSPDSCKNGQLQILSDFEK+EVNTCNPSTITGTLSR+FLCLGWGLPALVVAVSVGFTR+GRGPGTVPPGPGHAHQR+RTLSLQPGGGGTAGEEAPR+TMPRTVPGSTMK+WGPWNAWSLCSK+YLYLSLR
IPI00119959	Banf1	BANF1	barrier-to-autointegration factor.	0.93	AYVVLGQFLVLK+DFVAEPMGEKPVGSLAGIGDVLSK	0.298232	1.39683	0.229859	0.757622					YES
IPI00129519	Basp1	BASP1	brain acid soluble protein 1.	1	AEPEKSEGAAEEQPEPAPAPEQEAAAPGPAAGGEAPK+AGEASAESTGAADGAAPEEGEAK+APAPAAPAAAEPQAEAPAAAASSEQSVAVK+APAPAAPAAAEPQAEAPAAAASSEQSVAVKE+ESEPQAAADATEVK+ESEPQAAADATEVKESTEEKPK+ETPAASEAPSSAAK+KAEGAGTEEEGTPK+SEGAAEEQPEPAPAPEQEAAAPGPAAGGEAPK	0.084558		0.456361		0.398692	0.127298	0.248455	0.37954
IPI00653023	BC006779	PRIC285	novel protein.	1	ALATPLDDMASSPIQVR+CVPGSLQGR+EYFHDYVSSGHPEATPLR+FYYPLGIVLEVLPK+GPETEQKSMAQGPQR+LNQSQDRAVR+MASVGCSLRSASTSATNGPSLAGLCAK+QAPNPYAAEIR+QFTVIQGPPGTGK+QILIDEAGMATEPETLIPLVCFSK+QLSYEEAEELIKR+QLTLDRTVDPK+QVYFLIHHMTMEK+SASTSATNGPSLAGLCAK+SELNTAAGHR+VLICTHTNSAADIYIR
IPI00462363	BC026782		bc026782 protein.	1	CDNGFSPPSGYSWDYLR+CINGTINYPTCV+CTAQGWEPEVPCVR+CTLKPCEFPQFK+CTPTGWIPVPR+CVFHYVENGDSAYWEK+IYAHSGEDIEFECK+IYAHSGEDIEFECKR+IYVQGQSLK+KCVFHYVENGDSAYWEK+LDYECLVGFENEYK+LNDKLDYECLVGFENEYK+LYYEESLRPNFPVSIGNK+QGYVTNTGEISGSITCLQNGWSPQPSCIK+SCDMPVFENSITK+SDDEIRYECNYGFYPVTGSTVSK+TCGPPPPIDNGDITSLSLPEYEPLSSVDYQCQK+TCSPPYILNGIYTPHR+TKCINGTINYPTCV+VQCYNGYSLQNGQDIMTCTENGWSPPPK+WSEPPTCLHACVIPENIMEAHNIILK+YECNYGFYP…
IPI00606850	BC026782		putative complement factor h-related protein b precursor.	1	CDNGFSPPSGYSWDYLR+CINGTINYPTCV+CTAQGWEPEVPCVR+CTLKPCEFPQFK+CTPTGWIPVPR+CVFHYVENGDSTYWEK+IYAHSGEDIEFECK+IYAHSGEDIEFECKR+IYVQGQSLK+KCVFHYVENGDSTYWEK+LYYEESLRPNFPVSIGNK+SDDEIRYECNYGFYPVTGSTVSK+TCGPPPPIDNGDITSLSLPEYEPLSSVDYQCQK+TCSPPYILNGIYTPHR+TKCINGTINYPTCV+VQCYNGYSLQNGQDTMTCTENGWSPPPK+YECNYGFYPVTGSTVSK
IPI00321367	BC027061	FLJ22028	bone marrow stroma cell crl-2028 sr-4987 cdna, riken full-lengthenriched library, clone:g430133n01 product:hypothetical fad-dependentpyridine nucleotide-disulphide oxidoreductase/pyridine nucleotide-disulphide oxidoreductase, class i containing protein, full insertsequence.	0.85	YNAQGLGADHELMLR
IPI00760103	BC030046	KIAA1305	hypothetical protein loc277154.	0.94	AFPKHDTPLSLDVEQ+CVGDNPVVLR+EDIIEWLGHFGISGTCPNPEILICLAR+ESASLVTIKESPGTLQEIGALNRASENSK+ETALKHSPRPEIPSK+IISLSVVPGGCGIK+LQVQRIFR+SCLFCIPR+VKVTAFQSRPDTPYFWLQLEGPRENTGK+VQSETIATAGSEVPK+VSPGLLQVGQSSTSVGDK+WMGPFYIGDRLSLSLYR
IPI00321022	BC034076	LOC727754	novel protein similar to human hemicentin.	1	AAVWDAGHYTCEAINQAGR+AGEEVTLDCEAQGSPTPLLTWTK+ALLEVDR+DECSGGPSPCSHTCR+DGIPLHPGSPR+DGMALMGEGAQGSVHFAAVK+DGMALMGEGAQGSVHFAAVKTSDAGLYR+DVELVVQVPPR+ILQLPLVQAEDAGRYSCK+IMHASPEDAGNYFCIAQNSVGSAMAK+IQESHSGLYSCQAENQAGSAQR+KDGIPLHPGSPR+TTLLPCQTHGVPTPLVSWRK+VLQTDEGLNVLLNIPDSAK+YSCVATNVAGSQHR+YTCTARNSAGVARK
IPI00169499	BC034090	KIAA1614	hypothetical protein isoform 1.	0.89	AEAELPCGLQAWSHLPQLDDGVVGGEGR+CPAEERAASDLRVLR+KLFSALGHTPQPR+LFSALGHTPQPR+LLLQEILK+QVLSTVLHAVDQGPLR+RSSITSALGLK+VSSPQQR
IPI00137512	Bcar3	BCAR3	isoform 1 of breast cancer anti-estrogen resistance protein 3.	0.81	ELEEELLLSSEDLRSHAWYHGRIPR+HNTMAIGIAVDILGCTGTLENR+RLSLTTGSSIQAR+YGTSPGRGREGSLAEGRPDVVK
IPI00131168	Bche	BCHE	cholinesterase precursor.	1	AILESGSSNAPWAVK+DEGTAFLVYGAPGFSK+FAELENNAFFYFFEHR+FVLPSDSILSINFGPTVDGDFLTDMPHTLLQLGK+VLEMTGDIDETEQEWK+WSNYMMDWQNQFNDYTSK+YGHPNGTQGNSTMWPVFTSTEQK					8.42537
IPI00267661	Bcl9	BCL9	b-cell lymphoma 9 protein.	0.96	AVTPVSQGSNSSSADPK+ELEFGMVPGGMK+ELEFGMVPGGMKGEVNLNVNMGSSSQMIPQK+EPIGPDQR+FSNQGKPGGSASQSQPSPCDSKSGGHTPK+GMAADVGMGGFSQGPGNPGNMMF+GVVRGPPPPYQMAPGEGWAPGAEPFPDGINISHSLPPR+LPGFAGMINSEMEGPNVPNPASRPGLSGVSWPDDVPK+LRPGSSEMLPAQQK+QLALPPGMSMEGIRPGMEMNR+SPQTPSQLAGMLAGPAAAASIK+SPSLPAPSPGWTSSPKPPLQSPGIPPNHK+TDVGAPFGPQGHR+TVASSDDDSPPAR
IPI00134095	Birc6	BIRC6	baculoviral iap repeat-containing 6.	1	ACFGGLFANLIRPGDAK+CQYISAVDKVIFVDDYAVGCRK+EDILCGPVWLASGLDLSGHAGMLTLTSPK+ETFTSWPHVGYR+GTPSGTQSSR+IVTLEEEPVK+LVKGMAGGKYR+MAAAAAEASGPSCSSAAAAAGAGAAGVSEWLVLR+MNPLGSGLALAISHASHFLQPPPHQSIIIER+NANDANSAAR+NVVSGGYLVLYK+RAMASTPPRPPSRR+SMVSTIMKFLDSGPNKAVDSTLK+VAIGASRK	4.2279						5.95675		YES
IPI00113996	Blvrb	BLVRB	flavin reductase.	1	CLTTNEYDGHTTYPSHQYD+HDLGHFMLR+IAIFGATGR+LPSEGPQPAHVVVGDVR+NIVTAMKAHGVDKVVACTSAFLLWDPTK+QAADVDKTVAGQEAVIVLLGTGNDLSPTTVMSEGTR+TGLTTLAQAVQAGYEVTVLVR+TVAGQEAVIVLLGTGNDLSPTTVMSEGTR+VVACTSAFLLWDPTK+VVACTSAFLLWDPTKVPPR+YVAVMPPHIGDQPLTGAYTVTLDGR							0.386486		YES
IPI00469541	Bmp1	BMP1	bone morphogenetic protein 1.	1	AAAFLGDIALDEEDLR+AFQVQQAAVLR+CEAACGGFLTK+CSCDPGYELAPDK+CSCDPGYELAPDKR+RGGGPQAISIGK+TRLSKGDIAQAR	10.6837		35.8344	11.6847	15.8507		3.47837
IPI00221694	Bola2	BOLA2	isoform 1 of bola-like protein 2.	0.92	LRQDLEAEHVEVEDTTLNR								3.87571
IPI00221663	Bpgm	BPGM	bisphosphoglycerate mutase.	0.92	AVGPHQFLGNQEAIQAAIK	0.603986
IPI00314969	Brca2	BRCA2	breast cancer type 2 susceptibility protein homolog.	1	DSFCPHNEQILQHNQSMSGLKK+EDSICPSSVDTGSWPTTLTDTSATVKNAGLISTLK+EKPVVSGSLFYTPK+EPTLLSFHTASGK+FERPSIQLTATKR+IITQGAELVGSPDACAPLEAPDSLR+KEGTGSITSEK+KISEPHIFDLK+LAAMEFAFPKEFANR+LACIDIVNTLPLANQK+MLGDSSGKR+NAGLISTLKNKK+NTSCFLPNINEMEFGGFCSALGTK+NTSCFLPNINEMEFGGFCSALGTKLSVSNEALRK+QVFSEMDGDAK+TLVLCISDIISPSTK
IPI00121655	Brwd1	BRWD1	isoform a of bromodomain and wd repeat domain-containing protein 1.	0.82	CHGSDHGPSSTGDPSTSGQK+ILSDSEDCEEK+KLLSVYK+LGVDQDGTANGLPSGEGTPRR+LMSDAEDSSSESPCSGR+LSALIWEVR+MHPEVDGEDVPGQMGSSGCGPDTSPK+NLYVIGRK+SGVLRGSNLGVTRTR+TAQVTPSLQASAEVGVK+VIPQLMCPPSQSTSSK+VTMIAWNQDDSTVVTAVNDHVLK+VVVPEAPPGMFR
IPI00134093	Bsn	BSN	isoform 1 of protein bassoon.	1	AAGPPTPGLGPVPGPGPGPGPGSVPRR+ADTQAQPQMQGRQAAPGPQQSQPPSSRQTPSGTASR+EKPLSGGDSEVGAPQPSR+EPELEMESLTGSPEDR+EQQDTAESSDDFGSQLR+GDAVGFQEASLAQYSATTAREISR+GGMYRPYVSGGVTAVPLTSLTR+GLPSSASDMSLQTEEQWEAGRSGIK+GYMTPTSPAGSER+HPTDLLSHPLPLRR+MCAALNSMDQYGGR+QAELDEEEKEIDAK+SATTVPSGLGAGEQTQEGLTGK+TGPGSGPGALAKTGGTASPK
IPI00321375	Btd	BTD	12 days embryo female mullerian duct includes surrounding region cdna,riken full-length enriched library, clone:6820408j04product:biotinidase, full insert sequence.	1	EAEYYVAAVYEHPSVLSPNPLELVSR+GHLIIAQVATNPQGLTGTGNTTSEMDPSHR+GLSSGLVTAALYGR+HIVYPTAWMNQLPLLAAIEIQK+HNLYFEAAFDTPANVDLITFDTPFAGK+QEALELMK+QPCLSSDPGCPQDGR+TSIYPFLDFMPSPK					23.2761	16.1469
IPI00153284	Bud13	BUD13	isoform 1 of bud13 homolog.	0.94	EEEEDGDLPVVAEFVDERPEEVK+IVDDDVGWAAISTAKPEK+KRPKPGGAGGKGMR+QSSDSDLSPPR+RYLSGTDAGLEGGPEAGR+RYLSGTDAGLEGGPEAGRK+VRHDTPDTSPPR+YLSGTDAGLEGGPEAGRK
IPI00224036	Butr1		adult male testis cdna, riken full-length enriched library,clone:4930556i21 product:butyrophilin-like protein butr-1 homolog.	1	AECTSAGWYPEPK+HYWEVEVGDR+SPQHGLWALEFYK+VTETYLLASLSR
IPI00380426	C130038G02Rik	KIAA0774	isoform 1 of uncharacterized protein kiaa0774.	1	AAPASSSNATTPR+AAPASSSNATTPRR+EPLHLQGFGK+ETASGQTAPDVGQAAPVR+ETASGQTAPDVGQAAPVRR+GSSLEEMTGVSAGVEGSQQATPTLSAAPAGEAGTRLTGK+HPEVCLGQGTGK+LGSGNSGSTK+MSAGVGRMAR+QLSEEHAVKRGALQAPQCVQGPSLSSWR+SRILIASQRSSASAIHPPGSLTTAASFYGSDPSDLK+TGDTNANQIMLEVSSSCDEAKSR
IPI00125310	C1qa	C1QA	complement c1q subcomponent subunit a precursor.	1	DQPRPAFSAIR+DSLSFSNTNNK+FICAVPGFYYFNFQVISK+GLFQVLAGGTVLQLR+METSQGWLVACVLTMILVWTVAEDVCR+QNPMTLGNVVIFDK+RGDEVWIEKDPAK						6.04896	1.15946	3.68833
IPI00311147	C1qb	C1QB	complement c1q subcomponent subunit b precursor.	1	GNLCVNLVR+GPVGPKGTPGPSGPRGPK+LEQEEVVHLQATDK+TINSPLRPNQVIR+VITNANENYEPR+VPGLYYFTYHASSR+VVTFCDYAQNTFQVTTGGVVLK						31.2938	4.67412	2.43362
IPI00124470	C1qc	C1QC	complement c1q subcomponent subunit c precursor.	1	FNSVVTNPQGHYNPSTGK+QTTQYPEANALVR+VASFCDHMFNSK							3.84256	3.00071
IPI00407502	C1r	C1R	complement c1r-a subcomponent precursor.	1	ALDEFTIIQDPQPQYQFR+CLPVCGKPVNPVTQK+DGQSCQAECSSELYTEPSGYVSSLEYPQPYPPDLR+DTSPFSQNMFCSGDPAVQQDACQGDSGGVFAVR+DYFIVTCK+FCGQLDSPLGNPPGSK+GFLAYYQAVDLDECASQPNSVEEGLQPR+GIYTCTAQGIWK+GQPARPGNFPWQAFTTTHGR+GVTTYEASIQYHCHEPYYK+LPVADSEACQR+LVFWQFDVEPSEGCFYDYVK+LYGEVTSPLYPKPYPSDLETTTVITVPMGYR+MLVFLGHTNVEQIKK+NCGQPQSLSNGDFR+QGYQLMEGNQALLSFTAVCQNDGTWHR+QRPPDLDTSSNAVDLLFFTDESGDSR+VLNYVDWIK+WILTAAHTIYPK
IPI00377725	C1s		complement component 1, s subcomponent.	1	ASGALINEYWVLTAAHVLEK+CIPACGVPTEPFQVHQR+EDFDVEPADSEGNCPDSLTFASK+EENPTVRPEDYVFTDNMICAGEK+FYVAGLVSWGK+IENFPWQVFFNHPR+ISDPLMYVGTMSVR+KVFVINLR+LQVVFTSDFSNEER+NYVDWILK+SPNSPIIEEFQFPYNK+TNFDNDIALVQLKDPVK+TQSNTLGIVFQTDLMGQK+VFIHPSWK+VFVINLR+VPVTSLETCK+VSPICLPGTSSEYNVSPGDMGLISGWGSTEK+VSPICLPGTSSEYNVSPGDMGLISGWGSTEKK+WVNDQLGIELPR			354.32	105.176		6.04896	50.5675	3.87571
IPI00120192	C2	C2	isoform long of complement c2 precursor (fragment).	1	ALQQIFEHMLDVSK+CLAPSSFENGIYFPR+CQSNGQWLTPR+CSSSNMVLTGSAER+FFQVGLVSWGLFDPCHGSSNK+KCQSNGQWLTPR+QGISEFYADDIALLK+QHLDGVLDFLPL+TGLNFDLGDK+YPSPAWR							20.827	2.43785
IPI00323624	C3	C3	isoform long of complement c3 precursor.	1	AAVFNHFISDGVK+AAVFNHFISDGVKK+ACEPGVDYVYK+ADIGCTPGSGK+ADIGCTPGSGKNYAGVFMDAGLAFK+ADIGCTPGSGKNYAGVFMDAGLAFKTSQGLQTEQR+AFIDCCNHITK+AFYEHAPK+AGEYIEASYMNLQRPYTVAIAGYALALMNK+ALTQDDGVAK+AVLFNYR+AVLFNYREQEELK+AVMVSFQSGYLFIQTDK+CAEENCFMQQSQEK+CCEDGMRDIPMR+DFDSVPPVVR+DHVLGLAR+DICEGQVNSLPGSINK+DILSSNNQHGILPLSWNIPELVNMGQWK+DLELLASGVDR+DLNMDVSFHLPSR+DNHLAPGQQTTLR+DSCIGTLVVK+DSITTWEILAVSLSDK+DSITTWEILAVSLSDKK+D…	54.9243	32.8401	43.0812	42.2377	82.6791	518.519	4.04742	2.34973	YES
IPI00759878	C3	C3	isoform short of complement c3 precursor (fragment).	1	ACEPGVDYVYK+AGEYIEASYMNLQRPYTVAIAGYALALMNK+CAEENCFMQQSQEK+DFDSVPPVVR+DICEGQVNSLPGSINK+DLELLASGVDR+DLNMDVSFHLPSR+DTWVEHWPEAEECQDQK+FYHPEKDDGMLSK+GTLSVVAVYHAK+ISHTEEDCLTFK+KYLMWGLSSDLWGEKPNTSYIIGK+LEEPYLGK+LLWENGNLLR+NTLIIYLEK+NTMFLEICTK+QCEELGAFTESMVVYGCPN+QNEAFSLTAK+SEETKQNEAFSLTAK+SGSDEVQAGQQR+SSATTFRLLWENGNLLR+VHQYFNVGLIQPGSVK+VYSYYNLEESCTR+YLGDVDATMSILDISMMTGFAPDTK+YLMWGLSSDLWGEKPNTSYIIGK+YYGG…	54.9243	32.8401	43.0812	42.2377	82.6791	518.519	4.04742	2.34973	YES
IPI00551206	C4a	C4A	sex-limited protein.	1	AACFQLKDFLMEFSSR+ASAGLLGAHAAAITAYALTLTK+CCQDGMTK+CSVFYAAPTK+CSVFYAAPTKSQLLATLCSGDVCQCAEGKCPR+DFLMEFSSR+DQFQAALDK+DQFQAALDKINIGVR+DSSTWLTAFVLK+EIFTSTSIFQDAFTIPDISEPGTWK+EPFLSCCK+EYLIMGMDGETSDNK+FAEDLRR+FALMDEQGK+FALMDEQGKR+FSLGSTISVK+FVSSAFSLDLSR+GDPQYLLDSNTWIEEMPSEQMCK+GHIFVQTDQPIYNPGQR+GLCVAKPTR+GLEEELK+GTGFLSIEPLDPR+ILSLAQEQVGNSPEK+ITPWKPYILMVPSNSDEIQLDIQAR+ITQVLHFR+KEIFTSTSIFQDAFTIPDISEPGTWK+K…	33.279	758.564	20.9054	473.797	67.8284			278.506
IPI00134808	C4bp	C4BPA	c4b-binding protein precursor.	1	GVAWSNPFPECVIVK+HSGTEDFYPYNHGISYTCDPGFR+IICSQPNILHGVIVSGYK+ITLVTYECDK+LTLEVELLQLQIQK+MALEIYK+TDFESHTTLK+TDFESHTTLKYECLPGYGR+TMQYVPNSHDVK+TVPVWSSSPPTCEK+YECLPGYGR
IPI00352394	C530008M07Rik	FAM83B	riken cdna c530008m07 gene.	0.9	EDIAVSASPGISSQAEESR+ENTENQQNDNLLKR+KRSSSSNSQGSIHK+LSERAGDASAPR+MCSSSDTLVSEGEENQKPK+MEASSMLSSLNDECR+SLLSLTPEKR
IPI00314270	C6	C6	complement component 6.	1	ALVHLPLEYNSAVYSR+ATDLQLSDVFLK+CIPSKLECNGENDCGDNSDER+DQQEEDCTVSIMENVGQPCINDDEEMK+ECNLQTCPINCVLGDYGTWSDCDPCTEK+FDPCQCAPCPNNGRPR+FFPIPIFHFSEK+FLYMEIHKEDTCTK+GEVLDNSFTGGICK+GTSGPEENVYSEWLESVK+IFDDFGTHYFTSGSLGGK+IYTPIPSVQLMGTGFHFLAGEPR+LYSVGEEVEISCLTGFTAVGFQYLR+QELQNSGLTEEEAQNCVQYETK+QELQNSGLTEEEAQNCVQYETKK+QVVVNDYYWK+SCNSGTQSR+SQQAAALAWEK+SVLRPSQFGGQPCTEPLVTFQPCVPSK+TKPVCTRIYTPIPSVQLMGTGFHFLAGEPR+TSC…						6.04896
IPI00407657	C8a	C8A	complement component 8, alpha polypeptide.	1	AALGYNILTQEEAQSVYDAK+ALDQYLMEFNACR+AVTPQAVSCQLSDWYK+CGPCFNNGEPILDGTNCR+CIGGGIGIGIK+DSTIEGVGISGEFCENSGDGDR+DSTIEGVGISGEFCENSGDGDRDIR+FGGTICSGDIWDEASCDSPTPCLR+FINDYGTHYITSGTMGGIYEYVMVLDK+FINDYGTHYITSGTMGGIYEYVMVLDKEK+HLVCNGDNDCLDGSDESDCEDVR+HTNLGPLETK+HTNLGPLETKR+ITGVEDIISR+KITGVEDIISR+LYYGEDEKYFR+MFVVAFFGLSLVAWHPGVTAQEK+NGKSHSAGVTVGVAPVK+NNIVLDEGMLQSLMELPEQFNYGMYAK+QAQCGQDFQCR+RALDQYLMEFNACR+RNNIV…
IPI00121274	C8b	C8B	isoform 1 of complement component c8 beta chain precursor.	1	AEPLYELVTATDFAYSSTVK+ALEEFQSEVSSCR+CECICPGGFQGTACEVTYR+CEGFVCAQTGR+ELPTPELMEAWGDAVK+EMEQYWAIDR+EVEDCVTNQPCR+GGSPCSGPASETLNC+GGTSEDITALAYK+IKAEPLYELVTATDFAYSSTVK+KPYNVESYTPQTK+LASGINLFTNTFEGPVLDHR+LLCNGDNDCGDQSDEANCR+LLCNGDNDCGDQSDEANCRR+RLLCNGDNDCGDQSDEANCR+SLPLEYSYGEYR+STMVEDLVVLVR+SVAEAPAPIDCELSTWSSWTACDPCQK+SVLEVAHYK+WSCWSDWSACSGGHK+YYAGGCSPHYILDTNFR		6.65346		14.3558		71.6855	30.7405	28.3192
IPI00122122	C8g	C8G	complement component c8 gamma chain precursor.	1	AEATTLHAAPQGAAMAVSTFR+EANLTEDQILFFPK+FAGTWLLVAVGSSCR+FLFQVSR+FLQEQGHR+GPVHMVVAETDYQSFAILYLEQGR+GPVHMVVAETDYQSFAILYLEQGRK+KLDGICWQVR+KPIGSTSPISTIQAQVNFSAQK+QLFENTGVPGR+SLPVNDSVLDVFER+YGFCETADQLHILNEVPR		6.65346		9.01351		54.0141	10.9135	11.065
IPI00230718	C9	C9	complement component 9.	1	AVEDYIDEFSTK+AVEDYIDEFSTKR+CYPCLNGGTIILLDGQCLCSCPMMFR+DRVAEESELGLTAGYGINILGMEPLR+EEQEQHYPIPIDCR+EKTSNFNADFALK+EKTSNFNADFALKFSATEVPEK+FSATEVPEK+FSYFMGK+GEYFGFLETYGTHYSTSGSLGGQYEIVYVLDK+HCLGFNMDLR+IPLQDDLK+IPLQDDLKDASVTASVNADGCIK+KPWNVVSLIYETK+LLCNGDNDCGDYSDENDCDDDPR+LSSYFSQSK+MLCKPPGLPRR+MSPIYNLIPLK+QGCEPTQECEEIQENCGNDFQCETGR+RCYPCLNGGTIILLDGQCLCSCPMMFR+RLLCNGDNDCGDYSDENDCDDDPR+SCVDVLGDR+SILAFGQFN…	4.2279					3.52448	2.23198
IPI00408646	Cacna1a	CACNA1A	voltage-dependent p/q-type calcium channel subunit alpha-1a.	0.97	EPPGGAHDPAPR+ESARDPDARR+EVAEVSPLSAANMSIAVK+FGDEMPGRYGAGGGGSGPAAGVVVGAAGGRGAGGSR+LATGEPASPHDSLGHSGLPPSPAK+MARFGDEMPGRYGAGGGGSGPAAGVVVGAAGGR+QGSSSVSGSPAPSTSGTSTPR+QGSSSVSGSPAPSTSGTSTPRR+SATGEAWHNIMLSCLSGKPCDK+TPNNPGNPSNPGPPK+YGAGGGGSGPAAGVVVGAAGGR+YTDVDTGLGTDLSMTTQSGDLPSKDR							3.47837
IPI00128362	Cacna1c	CACNA1C	voltage-dependent calcium channel splice variant 1.2-a.	0.88	EAVSAASEDDIFRR+FDCFIVCGGILETILVETK+LNSSFPSIHCSSWSEETTACSGSSSMARR+MHKTCYNQEGIIDVPAEEDPSPCALETGHGR		6.65346
IPI00331064	Cacna1e	CACNA1E	voltage-dependent r-type calcium channel subunit alpha-1e.	0.92	ACFMNNSGILEGFDPPHPCGVQGCPAGYECK+ETGKAMVPHSSMFIFSTTNPIR+EVSPMSAPNMPSIER+GGPGPGMMCGAVSDLLSDTEEDDK+MIDQGLILQDGSYFR+MLDLLVPMPK+RPRPIEGLALGLGLEK
IPI00123380	Cacna1g	CACNA1G	calcium channel, voltage-dependent, t type, alpha 1g subunit.	0.96	ADSGACGPDSCPYCAR+KCYLGDTWNR+KRLALVALGEHSELR+LALVALGEHSELR+MFDHVVLVIIFLNCITIAMERPK+RLALVALGEHSELR+SESEPDFFSPSVDGDGDRKK+SSPHSPWSAASSWTSR+SSSTGVGEALGSGSR+TSSSGSAEPGTAHHEMK+VLKLLKMAVGMR+VYPTVHTSPPPEMLK
IPI00467841	Calm3	CALM3	12 days pregnant adult female placenta cdna, riken full-lengthenriched library, clone:i530005b05 product:calmodulin 1, full insertsequence.	1	EADIDGDGQVNYEEFVQMMTAK+EAFSLFDKDGDGTITTK	0.32313		3.3546		0.706053	0.112018	0.47334	0.153441
IPI00123639	Calr	CALR	calreticulin precursor.	1	EQFLDGDAWTNR+GQTLVVQFTVK+IKDPDAAKPEDWDER+MLLSVPLLLGLLGLAAADPAIYFK+SGTIFDNFLITNDEAYAEEFGNETWGVTK	0.60081	0.125961	1.29963	0.246966	0.206091	0.251031	0.065879	0.0459023	YES
IPI00112584	Camk2d	CAMK2D	isoform 1 of calcium/calmodulin-dependent protein kinase type ii deltachain.	1	ESTESSNTTIEDEDVK+GAILTTMLATR+ICDPGLTAFEPEALGNLVEGMDFHR+LTQYMDGSGMPK+RCMKIPTGQEYAAK
IPI00122475	Camp	CAMP	adult inner ear cdna, riken full-length enriched library,clone:f930015n03 product:cathelicidin antimicrobial peptide, fullinsert sequence.	1	AVDDFNQQSLDTNLYR+LLDLDPEPQGDEDPDTPK+QCMGAVTLNPAADSFDISCNEPGAQPFR+QLPEQCAFK
IPI00620590	Capn3	CAPN3	mup48.	0.88	HTNLPTLILSYSCK						6.04896
IPI00110390	Capns2	CAPNS2	calpain small subunit 2.	0.86	GLGGALGGLLGGGGQAR+MFLAKAILEGADRGLGGALGGLLGGGGQAR
IPI00798521	Car1	CA1	carbonic anhydrase 1.	1	ADGLAILGVLMK+DSISLSPEQLAQLR+EIVNVGHSFHVIFDDSSNQSVLK+GLLSSAEGEPAVPVLSNHRPPQPLK+LTQFHFHWGNSNDHGSEHTVDGTR+LYPIANGNNQSPIDIK+TSEANHDSSLKPLSISYNPATAK+VLDALNSVK+YSGELHLVHWNSAK
IPI00121534	Car2	CA2	carbonic anhydrase 2.	1	AVQQPDGLAVLGIFLK+DFPIANGDR+EPITVSSEQMSHFR+KYAAELHLVHWNTK+LIQFHFHWGSSDGQGSEHTVNK+QSPVDIDTATAQHDPALQPLLISYDK+SIVNNGHSFNVEFDDSQDNAVLK+TLNFNEEGDAEEAMVDNWRPAQPLK+VLEALHSIK+YAAELHLVHWNTK
IPI00133349	Carhsp1	CARHSP1	calcium-regulated heat stable protein 1.	0.96	LQAVEVVITHLAPGTK	0.528487								YES
IPI00230641	Cast	CAST	isoform 2 of calpastatin.	1	CGEDEDTVPAEYR+FQDVPSAGGESVAGGGTVATALDK+GVVPEDAVETLAGSLGTR+KVEEEVINDQALQALSDSLGTR+LGEKEETVPPDYR+LGERDDTIPPEYR+LSAAISEVVSQTPAPSTHAAAPLPGTEQK+QPDPPSHVSQAEQVK+SLSESELIGELSADFDR	3.54213	0.361968	1.3082	0.486486	0.747586		0.932214		YES
IPI00312058	Cat	CAT	catalase.	1	ASQRPDVLTTGGGNPIGDK+EAETFPFNPFDLTK+FNSANEDNVTQVR+FSTVAGESGSADTVR+FSTVAGESGSADTVRDPR+FYTEDGNWDLVGNNTPIFFIR+GPLLVQDVVFTDEMAHFDR+IQALLDKYNAEKPK+LAQEDPDYGLR+LCENIAGHLK+LCENIAGHLKDAQLFIQKK+LGPNYLQIPVNCPYR+LVNADGEAVYCK+MSDSRDPASDQMK+NFTDVHPDYGAR+NPVNYFAEVEQMAFDPSNMPPGIEPSPDK+SALEHSVQCAVDVK	0.152159	2.44332		0.422823			0.272101	0.26417	YES
IPI00314191	Cbr1	CBR1	carbonyl reductase [nadph] 1.	0.92	DLCRKFSGDVVLAAR+EYGGLDVLVNNAGIAFK+GVHAEEGWPNSAYGVTK+MSSSRPVALVTGANK+VVNVSSMVSLR	0.993452		1.30868	0.364781	1.33485	0.482519	0.992791
IPI00222237	Ccdc126	CCDC126	osteoclast-like cell cdna, riken full-length enriched library,clone:i420013g23 product:weakly similar to n-acetylglucosaminyltransferase, full insert sequence.	0.95	TIAVLLDDILQR	4.2279
IPI00119938	Ccl6		small inducible cytokine a6 precursor.	1	FIYYFPTSGGCIKPGIIFISR+FIYYFPTSGGCIKPGIIFISRR+RFIYYFPTSGGCIKPGIIFISRR+YNPPIIHQGFQDTSSDCCFSYATQIPCK
IPI00129384	Ccl8		small inducible cytokine a8 precursor.	1	APVTCCFHVLK+INNIQCPMEAVVFQTK+QGMSLCVDPTQK+WVSEYMEILDQK
IPI00308990	Cd14	CD14	monocyte differentiation antigen cd14 precursor.	1	FNSGVVTAGAPSSQAVALSGTLALLLGDR+LSVLDLSYNR+VFPALSTLDLSDNPELGER			7.96282	1.28764		6.04896	2.87549	6.00979
IPI00760106	Cd163	CD163	isoform 2 of scavenger receptor cysteine-rich type 1 protein m130precursor.	1	DASVVCKQLGCPTAISAIGR+EAAFGPGTGPIWLNEIK+EDASIQCLPK+FVHLGFFVVAVSSLLSASAVTNAPGEMKK+LVGGEIPCSGR+MIIYNPLR+MVLLGGAGSPGCK+MVLLGGAGSPGCKR+NWQWGGLSCDNFEEAK+QLGCGSAISFSGSAK+QLGCPTAISAIGR+YIDIRLAGGESSCEGRVELK							4.92315	2.96379
IPI00262127	Cd248	CD248	endosialin precursor.	1	ELGGNLATPR+GFIWTTGDQDTAFTNWAQPATEGPCPAQR+VDSLVGVGPANGLLWIGLQR							0.869593
IPI00420448	Cd300lg	CD300LG	clm9.	1	CGDIVYANQDQEVTR+DSPQELSMTVIMR+EISGFEGDTVSLR+MMAPVLILLSLLLAAGLIAFGSHMLRWRK
IPI00223769	Cd44	CD44	cd44 antigen isoform c.	1	YAGVFHVEK+YGFIEGNVVIPR	4.28487	31.344	2.87574	2.48548	1.12138	2.2569	1.32252	3.07886
IPI00109946	Cd48	CD48	cd48 antigen precursor.	0.99	TIFESEFK+VYLEENNGALHISNVR								4.09463
IPI00322234	Cd55	CD55	complement decay-accelerating factor, gpi-anchored precursor.	0.92	ATCLEDLVWSPVAQFCK+SDVGQWSSPPPR		23.6138
IPI00316045	Cd5l	CD5L	cd5 antigen-like precursor.	1	AGWNLQVSK+ALLTYGSCNK+EDVEVICTDFDV+ELNCGAVIQTPR+EQSLEFCR+GASYQPPASEQR+GPIWMGK+GSWGSVCDDNWGEK+GSWGSVCDDNWGEKEDQVVCK+IWLDDVNCSGK+IWLDDVNCSGKEQSLEFCR+LWGYHDCTHKEDVEVICTDFDV+MAPLFNLMLAILSIFVGSCFSESPTKVQLVGGAHR+MSCSGQEANLR+VEVEHNGQWGTVCDDGWDR+VEVEHNGQWGTVCDDGWDRR+VEVLHQSQWSTVCK							1.19135
IPI00129594	Cd84	CD84	isoform 1 of slam family member 5 precursor.	0.97	ADINEENEETITK+AEVTITQGTYK								1.21893
IPI00131498	Cd93	CD93	complement component c1q receptor precursor.	1	EEACEDVDECAAANSPCAQGCINTDGSFYCSCK+FGCSFNNGGCQQDCFEGGDGSFR+GFSWVGGGEDTAYSNWYK+GTVFSELPARPPQK+HVQQALTQLLK+LLDDLVTCASR+RCVSLILDLSLTPHPSHLPK+TPGIFHWGSSGPLCVSPK+VTYTTPFQATTSSLEAVPFASVANVACGDEAK+WHESPCGTPEAPGNSIEGFLCK
IPI00399798	Cd97	CD97	isoform 1 of cd97 antigen precursor.	1	ASLEDFYGSPIPSVSLK+CHCRPGWKPTSGSLR+CLIGYGVPLLIVAISMAVVK+CPGLLVVCILLSLSGAGTQK+CPGLLVVCILLSLSGAGTQKAESK+FDFTSVESIEPR+FSVEVQNLLR+GPDTICQEPPFPTWTLLPTAHSQTLLR+GPFTYTSPSNTELSLMVK+LLGNTPLNLEQR+LLSGAESFVNESENTCQASVNTGTTPVPSR+LLSNINSVFLTNTNTEK+NSEGSYTCVCNLGYK	1.4093					6.04896
IPI00228728	Cdca2	CDCA2	isoform 1 of cell division cycle-associated protein 2.	0.96	ALADEACAGGASTDLAEK+ASVTQDHIVSK+CCYLLPLTTASER+EENLENIEPPQGSFANLSLSK+EPASHSENVGR+ESNLCDDGAHLISYPSNSCK+MASSPSAAEADGESRISDLTR+RSLCGSTLTDANSATQPPDCK+SPDIGSAQPGCMAAPLPELR+VTFGEDLSPEVFDESLPANTPLCK
IPI00125505	Cdgap	CDGAP	cdc42 gtpase-activating protein.	0.82	GPSGIQPKPVETNFMGLAEGKEQEPQLELSNRQMK+HRPSSLNLDSATPIADLFR+IQNVILELPPPHYR+KIEATICNGDAAFLAVR+LLGMFYTSSDSPGK+QASITSCMYEGSSCSPEPSASTLASTQDAVVQCRK
IPI00318626	Cdh1	CDH1	epithelial-cadherin precursor.	1	AVYTVVNDPDQQFVVVTDPTTNDGILK+DPASESNPELLMFPSVYPGLR+DTANWLEINPETGAIFTR+DTGVISVLTSGLDR+DWVIPPISCPENEK+LETSFLVR+TVVKEPLLPPDDDTR+VFYSITGQGADKPPVGVFIIER+VTDDDAPNTPAWK	2.71709	3.71694	7.89139	5.79536		3.52448	18.5081	15.6704
IPI00123746	Cdh13	CDH13	cadherin-13 precursor.	1	DIQGSLQDIFK+LHYEVSSPHFK+TPHAEDMAELVIVGGK+VNSDGTLVALR					6.35448	15.7343
IPI00323134	Cdh2	CDH2	cadherin-2 precursor.	1	DVHEGQPLLNVK+FAILTDPNSNDGLVTVVKPIDFETNR+FLIYAQDKETQEK+IVGAGLGTGAIIAILLCIIILLILVLMFVVWMKR+QEEGLHAGTMLTTLTAQDPDR+SFPLTAEQAK+TGFPEDVYSAVLPK+VDEDGTVYAVR+VQYESSEPADFKVDEDGTVYAVR+WQVAVNLSR	113.976				47.3607	13.7972	10.9135	16.8164
IPI00138180	Cdh5	CDH5	cadherin-5 precursor.	1	AMVTINVLDVDEPPVFQR+DTFTIETDPK+ESIVQVYIEVLDENDNPPEFAQPYEPK+GNEYFSIDNSGLIFTK+IFGVDANTGNVLAYER+IVVETQDALGLR+LEDINDNFPVFTQSTYTFSVPEDIR+LVVQISATDKDVVPVNPK+NESLPHYVGK+NLEQPSSFTVK+VGKPLGFLTVVDPDEPQNR+VSEYFLTALIVDK+VTAVDADDPTVAGHATVLYQIVK+YSIMQGEYR+YVLQGEFAGK				3.67117		13.6224
IPI00380389	Cdsn	CDSN	corneodesmosin precursor.	0.91	GSSSSSGYPVGVVFQPVGSGGVQPCGTGSVSSK+NILTQVKPLGPQLMDPK+VSLPQGEPQGEPLEK+VSLPQGEPQGEPLEKS+WVSSSSQWVSSSSQSGSSGSSR
IPI00108535	Ceacam1	CEACAM1	isoform long of carcinoembryonic antigen-related cell adhesionmolecule 1 precursor.	1	DMGVYTLDMTDENYR+DMGVYTLDMTDENYRR+EIIYSNGSLLFQMITMK
IPI00349020	Centg1	CENTG1	isoform 1 of centaurin-gamma 1.	0.99	ALCTDMKR+ELRAEAAAVAGLSTPGSLHRAAK+EPPPSPMVK+LSLWAAPPGPPLSGGLSPDSKPGGAPSSSR+STAGTGASAAAAGGGGSAAVTTSGGVGAGAGTR+VKGSKSTAGTGASAAAAGGGGSAAVTTSGGVGAGAGTR
IPI00606583	Cep250	CEP250	centrosomal protein 250.	0.92	AALELLSLDLK+AQDLALSLAQSK+AVLALQQR+EALESSRLEGELLK+MNMELQLQGDSAQGEK+QALEEQQSGGPHSTSR+VEVAAALAR
IPI00114065	Cfb	CFB	complement factor b precursor (fragment).	1	AEGIPEFYDYDVALVK+ALFVSEQGK+ALLDIGRDPK+CLTNLIEK+CPRPQDFENGEFWPR+DASEVVTPR+DFHINLFQVLPWLK+DFHINLFQVLPWLKDK+DKLKDEDLGFL+DLEIEEVLFHPK+EDYLDVYVFGVGPLVDSVNINALASK+EQLLPVK+EQLLPVKDVK+FIQVGVISWGVVDVCR+FLCTGGVDPYADPNTCK+FLCTGGVDPYADPNTCKGDSGGPLIVHK+GDSGGPLIVHK+GGSFQLLQGGQALEYLCPSGFYPYPVQTR+GHETCMGAVVSEYFVLTAAHCFMVDDQK+HVIIIMTDGLHNMGGNPVTVIQDIR+KAEGIPEFYDYDVALVK+LEDIVTYHCSR+LKDEDLGFL+LNQISYEDHK+NPREDYLDVYV…	30.0511		115.456	3.67117			21.0396	3.62586
IPI00116945	Cfd	CFD	isoform 1 of complement factor d precursor.	1	DTCRGDSGSPLVCGDAVEGVVTWGSR+EVEPGTLCDVAGWGVVTHAGR+GDSGSPLVCGDAVEGVVTWGSR+MWIENITNGNMTS+RPDVLHQLR+TYHDGVVTINMMCAESNR+TYHDGVVTINMMCAESNRR+WYDVQSVVPHPGSRPDSLEDDLILFK									YES
IPI00121055	Cfh	CFH	complement factor h-related protein.	0.99	CDNGFSPPSGIFWDYLR+CGPPPPIDNGDITSLSLPEYEPFSSVDYQCQK+CISGTINYPTCE+CQSPYQMNGSDTVTCVNSR+CVATDQLEK+DKQEYEHSICINGK+FSVPPYHHGDSVEFTCAETFTMIGLGSVSCLSGK+GQVASCAQPPEIPNGEINGAK+GSITCTYYGWSDTPSCYEIECSVPILDR+HTENIYSHSGEDIEFECKYGYHKAR+IQCVDGMWTTLPVCVEEER+IYVQGQSLK+LNDKLDYECLIGHENEYK+LSVLCQDNYLTQDPEEMMCK+LSVLCQDNYLTQDPEEMMCKDGR+RVEYSHGEVVGYDCKPR+SCEFPQFK+SCERPVFENSVTK+TCGDIPELEHGSVK+TCSVSDIEIENGFFSESFR+TGEQVTFR…	81.6975		45.787			31.2938	0.751392	0.105491	YES
IPI00130010	Cfh	CFH	complement component factor h.	1	CDNGFSPPSGYSWDYLR+CGPPPPIDNGDITSLSLPVYEPLSSVEYQCQK+CINGTINYPTCV+CLPVTELENGR+CQSPYQMNGSDTVTCVNSR+CRPGYR+CSPPYILNGIYTPHR+CTAQGWEPEVPCVR+CTLKPCEFPQFK+CTPTGWIPVPR+CVATDQLEK+CVEILCTPPR+CVFHYVENGDSAYWEK+DKQEYER+DNSCVDPPHVPNATIVTR+DSIESSSHEHGTTFSYVCDDGFR+DSIESSSHEHGTTFSYVCDDGFRIPEENR+ECGADGWINDIPLCEVVK+ECSVPTLDR+ECSVPTLDRK+EIHCSENGLWSNEKPR+ENSEILSGSWSEQLYPEGTQATYK+ERGDAVCTGSGWSSQPFCEEK+ERGDAVCTGSGWSSQPF…	81.6975		45.787			31.2938	0.751392	0.105491	YES
IPI00756673	Cfh	CFH	similar to complement factor h precursor.	1	CDNGFSPPSGYSWDYLR+CGPPPPIDNGDITSLSLPVYEPLSSVEYQCQK+CINGTINYPTCV+CQSPYQMNGSDTVTCVNSR+CTAQGWEPEVPCVR+CVFHYVENGDSAYWEK+DKQEYER+DNSCVDPPHVPNATIVTR+DSIESSSHEHGTTFSYVCDDGFR+DSIESSSHEHGTTFSYVCDDGFRIPEENR+HTEKIYSHSGEDIEFGCK+IPCSQPPTIEHGSINLPR+IQCVDGNWTTLPVCIEEER+ITCYMGK+IYSHSGEDIEFGCK+KCVFHYVENGDSAYWEK+KVEYSHGEVVK+LDYECLVGFENEYK+LNDKLDYECLVGFENEYK+LSVLCQDNYLTQDSEEMVCK+LSVLCQDNYLTQDSEEMVCKDGR+LYYEESLRPNFP…	81.6975		45.787			31.2938	0.751392	0.105491	YES
IPI00121050	Cfhr1	CFHR1	complement factor h-related protein.	1	CGPPPPIDNGDITSLSLPVYASLSSVEYQCQK+CISTNPTGK+HGILYDEK+ILYYSCEYNFASPSNSFWTR+ITCTESGWSPTPK+KNEPFSSVLSGK+TQCINGHINYPTCMLNHNTFIH+VYIQSGEDIEFGCKPR+WSEPPTCIYPTGK+WSEPPTCLSACVISEAIMER
IPI00828931	Cfhr1	CFHR1	91 kda protein.	1	CDNGFSPPSGIFWDYLR+CGPPPPIDNGDITSLSLPEYEPFSSVDYQCQK+CISGTINYPICE+CQSPYQMNGSDTVTCINGRWIGKPVCK+CTVQGWEPEVPCVR+CVATDQLEK+DKQEYEHSICINGK+GQVASCAQPPEIPNGEINGAK+GSITCTYYGWSDTPSCYEIECSVPILDR+IQCVDGMWTTLPVCVEEER+ISCPPPPQIPNTQVIETTVK+IYVQGQSLK+KISCPPPPQIPNTQVIETTVK+LNDKLDYECLIGYENEYK+LSVLCQDNYLTQDPEEMMCK+LSVLCQDNYLTQDPEEMMCKDGR+LYYEEILRPNFPVSIGNK+NIYSHSGEDIEFECK+QGYVTNTGETSGSITCLQNGWSPQPSCIK+RVEYSHGEVVGYDC…
IPI00320675	Cfi	CFI	complement factor i precursor.	1	ACNGVNDCGDQSDELCCK+AGTPVCAMNGR+AHSYQVWTALLDWLKPNSQLGIQTVK+CIEGTCICK+CIISGWGR+CNGEVDCITGEDESR+CNGEVDCITGEDESRCEEDR+ECELPNSVPACVPWSPYLFQPNDR+EMQCAGTRDGSIDACK+GVETSLAECAFTK+ITCGGIYIGGCWILTAAHCVRPSR+KECELPNSVPACVPWSPYLFQPNDR+LPYQCPR+NSWSMAEANVACVDLGFPLGVR+QDADFPTSLSFQCVNGK+RTELSNGLAGVVCYK+SAQGEAEIETEETEMLTPGMDNER+SAQGEAEIETEETEMLTPGMDNERK+SFECLHPEIK+SGVCIPDQYK+SLVSQHNV+SPSASDLPQEELVDQK+SPSASDLPQEELVD…	59.1022		195.077	11.6847		6.04896	6.69593
IPI00762023	Cfi	CFI	67 kda protein.	1	AGTPVCAMNGR+AHSYQVWTALLDWLKPNSQLGIQTVK+CIEGTCICK+CIISGWGR+CNGEVDCITGEDESR+CNGEVDCITGEDESRCEEDR+ECELPNSVPACVPWSPYLFQPNDR+EMQCAGTRDGSIDACK+FNVSLIYGR+GVETSLAECAFTK+ITCGGIYIGGCWILTAAHCVRPSR+KECELPNSVPACVPWSPYLFQPNDR+LPYQCPR+NSWSMAEANVACVDLGFPLGVR+RTELSNGLAGVVCYK+SAQGEAEIETEETEMLTPGMDNER+SAQGEAEIETEETEMLTPGMDNERK+SFECLHPEIK+SGVCIPDQYK+SLVSQHNV+SPSASDLPQEELVDQK+SPSASDLPQEELVDQKCLLQKYTHR+SYPTYCHQK+TEGLV…	59.1022		195.077	11.6847		6.04896	6.69593
IPI00407543	Cfl1	CFL1	12 days embryo embryonic body between diaphragm region and neck cdna,riken full-length enriched library, clone:9430060j01 product:cofilin1, non-muscle homolog.	1	AVLFCLSEDKK+EDLVFIFWAPENAPLK+EILVGDVGQTVDDPYTTFVK+HELQANCYEKVKDR+KEDLVFIFWAPENAPLK+NIILEEGKEILVGDVGQTVDDPYTTFVK+YALYDATYETK	1.43615	1.6556	2.04298	0.821538	2.79285	0.702566	1.1945	0.356423	YES
IPI00115973	Cfp	CFP	properdin precursor.	1	CGGHCPGEAQQSQACDTQK+DIRVEDCCLNAAYAFQEHDGGLCQACR+FNGKPCAGK+HCYNIHNCIMK+HGGPFCAGDATR+KFNGKPCAGK+LCTPLLPK+LQDIRHCYNIHNCIMK+MSINCEGTPGQQSR+RSCLHVPVCKDPEEK+SCLHVPVCKDPEEK+SCLHVPVCKDPEEKKP+SCSAPAPSHQPPGKPCSGPAYEHK+TCDHPAPR+VCDNPAPK+VEDCCLNAAYAFQEHDGGLCQACR+YPPTVSMVEGQGEK							2.10878
IPI00347698	Cgref1	CGREF1	cell growth regulator with ef hand domain 1.	1	EGAEEQVEIKDNEGEAK+ELLVETLESLNTPNEAEAHSIQLENDEI+GQAESEGDVPGPR+LDPEVQQQLTPNPFQPGPEQLR+VDTLSPEEEAR
IPI00345676	Chd7	CHD7	novel protein similar to chromodomain helicase dna binding protein 7.	0.98	AEECEHSPAK+AGGLGINLTAADTCIIFDSDWNPQNDLQAQAR+DDFPGGVENQELR+DRVMINR+EDELMEFSDLESDSEEKPCAKPR+ENATNGVQQLSKK+ISDEEADDADAAGR+KAELDIDALNGR+KMGGAMAPPMK+KVEIEAERAAK+RNLMEMVAQLR+SFAELSMVSQASISASEDITTSPQLSK+YFSCFVAMCRR
IPI00407590	Chd8	CHD8	chromodomain helicase dna binding protein 8.	0.95	AGGLGINLTAADTCIIFDSDWNPQNDLQAQAR+GAGHTNMPNLLNTMMELRK+GSAPAGNPGAAGPPLKPAVTLTSTPTQGESK+LMANGVMGDGHPLFHK+LSPSSSSSSSSSSSSSSTDESEDEK+SQEILSQGNPFMGVSATGVSPSNTGGQPSQSAPK+SRLTSQDYEVRVGSSDTAPLSR+VDGTLLVGDEAPR+VGSSDTAPLSR+VLNEDELPSVRPEEEGEK+VVSTFGVEYDPDNMQFHWDR
IPI00229732	Chdh	CHDH	choline dehydrogenase.	0.81	ADSAYHPSCTCK+AEVQTLVSR+DEYTFVVVGAGSAGCVLASR+EVILSGGAINSPQLLMLSGVGNADDLRK+VCIGLEWLWSYTGDGATAHLETGGFIR
IPI00113703	Chga	CHGA	chromogranin a precursor.	1	AEDQELESLSAIEAELEK+AGPEEVPTAASSSHFHAGYK+AKQEEKEEEEEEEAVAR+CVLEVISDSLSKPSPMPVSPECLETLQGDER+DDGQSDSQAVDGDGKTEASEALPSEGK+ELQDLALQGAK+GELEHSQQEEDGEEAMVGTPQGLFPQGGK+QEEKEEEEEEEAVAR+RAEDQELESLSAIEAELEK+TEASEALPSEGK
IPI00130307	Chgb	CHGB	secretogranin-1 precursor.	1	CIIEVLSNALSK+ELENLAAMDLELQK+GNPDDSFLEDEGEDR+KELENLAAMDLELQK+LLRDPADASGTR+MQPAMLLGLLGAAALAAVSSAPVDNR+NYLNYGEEGDQGR+QYDGVAELDQLLHYR+SSVPTITPECR
IPI00157508	Chi3l3		chitinase 3-like protein 3 precursor.	1	DNNLGGAVVWPLDMDDFSGSFCHQR+IPELSQSLDYIQVMTYDLHDPK+LIVGFPAYGHTFILSDPSK+LLLTSTGAGIIDVIK+SADLNVDSIISYWK+TGIGAPTISTGPPGK
IPI00110612	Chit1	CHIT1	isoform 2 of chitotriosidase-1 precursor.	1	FTALIQDLAK+IAQSLDFINLMAYDFHSSLEK+SFTLASSSDNGVGAPATGPGAPGPYTK+TQGFDGLDLDWEFPGGR							5.45675
IPI00225548	Cilp	CILP	cartilage intermediate layer protein 1 precursor.	1	ACEEAPPSAAHFR+CSAACGHTGVQTR+DAVENCCGISR+FLPSEQIQGVVVSVINLEPR+VTQLTVIAHDETPCNPTPESYLIR	48.9185
IPI00317134	Ckap5	CKAP5	cytoskeleton associated protein 5.	0.91	AAASGAAGDK+AKELGIEICLMYVEIEK+CGLDNTK+CGNNAKEAMTAIAEACMLPWTAEQVMSMAFSQK+DAAFEALGTALKVVGEKSVNPFLADVDK+DQVLAMLEKAK+EGLDEVAGIINEAK+EKLKQCK+HSMDQTGSKSDK+NLGIPVITVLGDSK+TQPIPAPVEDSVSSTIEAKPDLKK+YSDTDIEPFLK						0.612389		4.09463
IPI00127596	Ckm	CKM	creatine kinase m-type.	0.96	GGDDLDPNYVLSSR+LSVEALNSLTGEFK									YES
IPI00131135	Clca4		calcium-activated chloride channel clca4.	0.94	CSTDITGTSVVRECQGGSCVSR+ECQGGSCVSRR+ELETLSDMTGGLR+LPQYPNGGTSICNGLK+LSSEVSNIAQAVK
IPI00317193	Clcf1	CLCF1	cardiotrophin-like cytokine factor 1 precursor.	0.84	LGAETLPR
IPI00128682	Clec11a	CLEC11A	c-type lectin domain family 11 member a precursor.	0.99	DFETQAAAQAR+GGSLAQPADRQQMDALSR+VVELTQGLR					30.7015
IPI00320239	Clec3b	CLEC3B	tetranectin precursor.	1	AENCAALSGAANGK+CLLAFTQPK+CRDQLPYICQFAIV+DQLPYICQFAIV+HSVGNDANIWLGLNDMAAEGAWVDMTGGLLAYK+MDVLAQEVALLK+MFEELK+NWETEITTQPDGGK+NWETEITTQPDGGKAENCAALSGAANGK+QALQTVCLK+TFHEASEDCISQGGTLGTPQSELENEALFEYAR
IPI00330594	Clec4f	CLEC4F	c-type lectin domain family 4 member f.	1	ANGHLEQTDAQIQGLK+DLSDVSALK+ELETLTAQTQK+ESGALALETQALR+ETEMQVAIQR+GLEEAQSEIQALR+GSLQSANDLSSQTQGFLQHSMDNISAQIQTVR+LGALQEAVAAQK+QQWNDMACGSSYPWVCK+SNVQMLQSNLQR+SSLEVASADIHSLR+SSTENTSAELHVLGR+TQNQVLQLIAQNWK+WVDGTPFNNAQSK+YFNGNFYYFSR
IPI00320420	Clu	CLU	clusterin precursor.	1	ASGIIDTLFQDR+ASGIIDTLFQDRFFAR+CQEILSVDCSTNNPAQANLR+EDALEDTR+EDALEDTRDSEMK+EIQNAVQGVK+ELHDPHYFSPIGFPHK+ELLQSFQSK+FMDTVAEK+IDSLLESDR+IDSLLESDRQQSQVLDAMQDSFAR+KEDALEDTR+KEDALEDTRDSEMK+KKEDALEDTR+KSLLNSLEEAK+KSLLNSLEEAKK+LFDSDPITVVLPEEVSK+LFDSDPITVVLPEEVSKDNPK+LTEQYKELLQSFQSK+QELNDSLQVAER+QQSQVLDAMQDSFAR+RPHFLYPK+SLLNSLEEAK+SLLNSLEEAKK+VSTVTTHSSDSEVPSR+VSTVTTHSSDSEVPSRVTEVVVK+YINKEIQNAVQGVK	32.7488	13.3025	7.96451	3.17117		11.0979	5.65242	4.51356	YES
IPI00331146	Cmpk	CMPK	8 days embryo whole body cdna, riken full-length enriched library,clone:5730439h01 product:ump-cmp kinase homolog.	1	IQTYLESTKPIIDLYEEMGK+KNPDSQYGELIEK+NQDNLQGWNK			0.614863	0.343667
IPI00661635	Cmya1	CMYA1	cardiomyopathy associated 1.	0.83	AASGRPEGTIASPLGSGAPDLQEAMQNLR+DFQPSPDLIPPGPDVQHQR+EMCIEGAVLTGQPK+EPAATGDVQGTRK+GISLEEGALPDVSATR+GQNTDSAEQSQGSDAPVYAMQDSRGQLHALTSVSR+LLDIEEAVHK+LNVLNNDSSPPQK+TSDPHGAIQPSEK+VSGDNKAVPRGLPR
IPI00845587	Cmya3	CMYA3	cardiomyopathy associated 3.	0.83	DSLSNGVPHSR+DSPDTDSVSPEER+EEQCGFKEVDKQGIVK+EVHSVPGVTVSGKNHKR+MNQYSSSGELERSLSDVEIK+QEGIQNSSDASQSK+QESSSHNVIK+QGNLHNLSKDSLSNGVPHSR+RSEVVMSPATLRR+SEVVMSPATLRR+TCMWLFETQPLDAIK+TDVCLESQDFLMKTNTSKELK+TFQILLNIVPVWLISEEKR+TQAEEMLLQCEHVIQTAMMASQTGK+WMFETRPLDSMNK
IPI00137229	Cnbp	CNBP	isoform 2 of cellular nucleic acid-binding protein.	1	CYRCGETGHVAINCSK+DCDLQEDACYNCGR+GFQFVSSSLPDICYR	10.6837		15.929		2.38293		4.03744	0.553672
IPI00118920	Col11a1	COL11A1	isoform long of collagen alpha-1(xi) chain precursor.	0.99	ALDFHNSPVGISK+DGVQGPVGLPGPAGPAGSPGEDGDK+FLGSNDEEMSYENNPHIK+GDSGMPGPPGPPGPPGEVIQPLPILSPK+GEDGDPGQPGPPGPSGEAGPPGPPGKR+GEKGEDGFPGFK+GENGDVGPMGPPGPPGPR+GEPGEAGNPGPPGEAGSGGLK+GERGEKGEAGPPGAAGPAGIK+GESGDPGPQGPRGVQGPPGPTGKPGKR+GETGFQGKTGPPGPGGVVGPQGPTGETGPIGER+GGEGPQGPQGPVGSPGER+GLLGPRGTPGPPGQPGIGGIDGPQGPK+GLPGEAGPRGLLGPR+GPPGRPGLPGADGLPGPPGTMLMLPFR+GTPGPPGQPGIGGIDGPQGPK+TGPVGPQGPSGKPGPEGLR+VYCNFTAGGETC…
IPI00138069	Col11a2	COL11A2	isoform 7 of collagen alpha-2(xi) chain precursor.	1	DDVTQFSYVDSEGSPVGVVQLTFLR+GEHGPPGPPGPIGPVGQPGAAGADGEPGAR+GEKGEDGFPGFK+GEKGESGQAGEAGPPGPK+GETGDGGPMGPPGPPGPR+GETGIPGASGPIGPGGPPGLPGPSGPK+GGVLLGPVCFMG+GHSGPPGPPGEQGLPGTSGK+GKPGLPGMPGSDGLPGHPGK+GLPGSVGQQGRPGATGQAGPPGPVGPPGLPGLR+GPPGIPGPPGVR+GPPGPMGYTGRPGPLGQPGSPGLK+GSLGFPGFPGASGEK+TPVLEQLPVLDASFADLGAPTR+TRPGLQAPLLTLYSAQGVQQLGLELGRPVR
IPI00131476	Col18a1	COL18A1	isoform 2 of collagen alpha-1(xviii) chain precursor.	1	AASCHNSYIVLCIENSFMTSFSK+AGQGGSPATPAVPIPLVAPAASPDMKEENVAGVGAK+EGPPGVAGQK+EVPEGWLIFVAEREELYVRVR+GADFQCFQQAR+GMPGEKGNPGKDGVGRPGLPGPPGPPGPVIYVSSEDK+GSVPIVNLKDEVLSPSWDSLFSGSQGQLQPGAR+ILNVAQGIR+LCLLLLLLLSCR+QTVSVPGPPGPPGPPGPPGAMGASAGQVR+SSDGLQGPPGSPGLK+TETTGATGQASSLLSGR	2.03674		10.9527	3.67117		6.04896	2.81171
IPI00126387	Col19a1	COL19A1	collagen alpha-1.	0.93	GAIGPVGPAGSK+GDEGLQGIPGLSGAPGPTGPPGLTGR+GDMGPPGPPALTGSIGIQGPQGPPGK+GDSGLDGLNGQDGLKGDSGPQGPPGPK+GEPGLLGPQGIK+GKPGLTGMK+GLPEEYAIAVMFR+GPAGPPGIAGISGKPGAPGPPGVPGEQGER+GTGEHGASGPK
IPI00329872	Col1a1	COL1A1	isoform 1 of collagen alpha-1(i) chain precursor.	1	ALLLQGSNEIELR+DGAPGAKGDRGETGPAGPPGAPGAPGAPGPVGPAGK+DRDLEVDTTLK+EGECCAFCPEEYVSPNSEDVGVEGPK+EGSPGAEGSPGR+FTYSTLVDGCTSHTGTWGK+GAAGPPGATGFPGAAGR+GDRGETGPAGPPGAPGAPGAPGPVGPAGK+GEAGPPGPAGFAGPPGADGQPGAK+GEQGPAGSPGFQGLPGPAGPPGEAGKPGEQGVPGDLGAPGPSGAR+GETGPAGPAGPIGPAGAR+GFSGLDGAKGDAGPAGPKGEPGSPGENGAPGQMGPR+GNNGAPGNDGAK+GPPGPQGARGLPGTAGLPGMKGHR+GQAGVMGFPGPK+NGDRGETGPAGPAGPIGPAGAR+NSVAYMDQQTGNLK+NSVAYMDQQTGN…	4.2279				93.3172	77.4967	25.1171	3.20904
IPI00222188	Col1a2	COL1A2	collagen alpha-2(i) chain precursor.	1	AVLLQGSNDVELVAEGNSR+DGARGIPGAVGAPGPAGASGDRGEAGAAGPSGPAGPR+DYEVDATLK+FTYSVLVDGCSK+GATGLPGVAGAPGLPGPR+GATGLPGVAGAPGLPGPRGIPGPAGAAGATGAR+GDGGPPGMTGFPGAAGR+GEAGAAGPSGPAGPR+GEPGAPGENGTPGQAGAR+GEPGSVGAQGPPGPSGEEGK+GERGYPGSIGPTGAAGAPGPHGSVGPAGK+GEVGPAGPNGFAGPAGAAGQPGAK+GIPGAVGAPGPAGASGDR+GLPGEFGLPGPAGPR+GLPGIAGALGEPGPLGISGPPGAR+GQPGAQGVK+GSDGSVGPVGPAGPIGSAGPPGFPGAPGPK+GSQGSQGPAGPPGPPGPPGPPGVSGGGYDFGFEGD…	7.4558				8.42537	3.52448	5.45675
IPI00677720	Col22a1	COL22A1	similar to collagen, type xxii, alpha 1 isoform 3.	0.99	EGPPGPQGPSGIPGVPGEEGKQGR+GDPGIGVAGPPGPSGRPGDK+GDPGTPGVGLR+GDSGRGPFIHGEKGEK+GDTGPPGPPGPPGVAGPQGSQGER+GEPGDSGESGVPGMPGPR+GEPGELGEPGLPGEVGMR+GEVGLPGAPGFPGVHGEK+GFAGPLGLPGQK+GHDGAQGPPGAAGNPGAPGPAGPPGLSGPPGSLGSPGVR+GHTGLMGPQGQPGESGPPGPPGPPGQPGFPGLR+GMRGEPGELGEPGLPGEVGMR+GTAGEEGSPGPAGPR+GTPGIPGSPGSR+IFAVGVGAALK+SAHVFHVSDFNAIDKIR+SQDLVLDAAAAAHAAGIR+TGPMGEPGRPGQGGLEGPSGPMGPK
IPI00551234	Col24a1	COL24A1	procollagen, type xxiv, alpha 1.	1	EGIIGPTGGTGPR+GASGPPGSPGAPGPK+GASGPPGSPGAPGPKGEQGLPGQPGVPGQRGHR+GDGGPAGSAGATGEPGPRGEPGAPGEEGLQGK+GDPGPPGPPGPMGIPGPSGK+GEPGAPGEEGLQGK+GPDGLAGDQGGHGAK+GPRGPDGLAGDQGGHGAKGEK+GQPGPPGPPGAPGPR+GQPGPPGPPGAPGPRRQMDINAAIR+GVMGYPGPPGAPGPMGPLGLPGLVGAR+QGLAGPEGNPGSK+QGLAGPEGNPGSKGVR+QPLTVLIGLQSFK+RGVPGPSGKPGIPGVPGFPGPK+YIESNSVCFL
IPI00408491	Col27a1	COL27A1	procollagen, type xxvii, alpha 1.	0.96	EGIIGPPGMLGPSGLPGPK+GDCGLPGPPGLPGLPGSPGAR+GDLGPLGPPGEQGLIGQR+GFLGIPGPSGPPGAK+GLMGGVGEPGLK+GLPGEPGSQGPQGPVGPPGEMGPK+GNMGLPGLSGNPGPLGRKGHK+GPPGAVGEPGLPGDSGMK+GPPGAVGEPGLPGDSGMKGDLGPLGPPGEQGLIGQR+GTEGGTGLPGNQGEPGSK+GYIGLPGLFGLPGSDGER+KTPSPSSSASLANSTR+LQAPTANVLPTTLGR+QGPEGTAGSDGIPGR+TEGPPGPPGDR							3.47837
IPI00471183	Col2a1	COL2A1	isoform 2 of collagen alpha-1(ii) chain precursor.	1	GAPGERGETGPPGPAGFAGPPGADGQPGAK+GAQGPPGATGFPGAAGR+GDVGEKGPEGAPGKDGGR+GEPGNPGSPGPAGASGNPGTDGIPGAK+GETGPAGPQGAPGPAGEEGKR+GEVGPPGPSGSTGARGAPGER+GFTGLQGLPGPPGPSGDQGASGPAGPSGPR+GLPGPQGARGFPGTPGLPGVKGHR+GPEGAQGSR+GPEGAQGSRGEPGNPGSPGPAGASGNPGTDGIPGAK+GPPGPAGAPGPQGFQGNPGEPGEPGVSGPMGPR+GPPGPAGKPGDDGEAGKPGK+QGDRGEAGAQGPMGPSGPAGAR+SGETGPVGPPGSPGPPGPPGPPGPGIDMSAFAGLGQR+VGPPGANGNPGPAGPPGPAGK	1.05697		6.47042	0.917792		11.0979
IPI00129571	Col3a1	COL3A1	collagen alpha-1(iii) chain precursor.	1	FTYTVLEDGCTK+GEGGPPGPAGPTGSSGPAGPPGPQGVK+GEMGPAGIPGAPGLIGAR+GEPGPQGHAGAQGPPGPPGNNGSPGGK+GERGSEGSPGHPGQPGPPGPPGAPGPCCGGGAAAIAGVGGEK+GETGPAGPSGAPGPAGARGAPGPQGPR+GETGPAGPSGAPGPAGARGAPGPQGPRGDK+GEVGAPGAPGGK+GEVGAPGAPGGKGDSGAPGER+GMPGSPGGPGNDGKPGPPGSQGESGRPGPPGPSGPR+GPAGMPGFPGMKGHRGFDGR+GPAGPIGPPGPAGQPGDK+GPAGPPGPPGASGSPGLQGMPGER+GPPGPQGLPGQPGTAGEPGR+GRPGLPGAAGAR+INTEEIMSSLK+NSIAYMDQASGNVK+SGEYWVDPNQG…						3.52448	3.47837	3.87571
IPI00338452	Col4a2	COL4A2	collagen alpha-2(iv) chain precursor.	1	GERGEQGPPGPSVYSPHPSLAKGAR+GLDGFQGPSGPR	9.8087				19.0634		3.66972
IPI00113477	Col4a5	COL4A5	col4a5 protein.	0.98	GDDGMQGQPGLPGPAGEK+GDTCFNCIGTGISGPPGQPGLPGLPGPPGSLGIPGEK+GELGFPGAPGLPGLPGSPGK+GEMGMMGPPGPPGPLGIPGR+GEPGIPGIGPPGPPGPK+GEPGLPGIPGLSGPK+GEPGLPGYPGNPGIK+GEPGQPGFGIPGPPGLPGLSGQK+GEPGVSGIGLPGLPGPK+GEQGLQGPPGPPGQISEQK+GFPGPSGPPGR+GISGPSGPPGPPGLMGPPGPPGPPGPKGNMGLNFQGPKGEK+GQAGITGPKGLPGIPGPPGAPGFPGSKGDPGDVLTLPGMK+GSPGLPGAPGLIGPPGSPGVPGK+GTPGPKGDRGFPGPSGPPGR+KGDPGLPGQPGAR
IPI00128689	Col5a1	COL5A1	collagen alpha-1(v) chain precursor.	1	EPAPTQKPVEAAR+GDPGPSGPPGIPGDDGER+GEAGPSGAAGPPGPK+GEKGEDGFPGFK+GEPGEAGDPGLPGEGGPLGPK+GETGDVGQMGPPGPPGPR+GGPNGDPGPLGPTGEKGKLGVPGLPGYPGR+GIPGPVGEQGLPGSPGPDGPPGPMGPPGLPGLK+GPAGAAGPIGIPGRPGPQGPPGPAGEK+GPPGPAGPEGR+GPPGRPGLPGADGLPGPPGTMLMLPFR+GRGGPNGDPGPLGPTGEKGK	4.2279		5.97634				3.47837
IPI00121120	Col5a2	COL5A2	collagen alpha-2(v) chain precursor.	1	GAHGMPGKPGPMGPLGIPGSSGFPGNPGMK+GDAGSPGPQGLAGSPGPHGPHGVPGLKGGR+GEAGPTGPMGAMGPLGPR+GETGPPGPAGSQGLPGAVGTDGTPGAK+GLPGPLGPPGPAGPTGEK+GNPGPTGTIGDTGPPGLQGMPGERGIAGTPGPK+GPEGPPGKPGEDGEPGR+GPPGPVGPPGSNGPVGEPGPEGPAGNDGTPGR+GSSGDLGKPGEAGNAGVPGQRGAPGK+GTQGPPGATGFPGSAGR+LGPQGAPGK+NGNTGEVGFSGSPGAR+QSGEYWIDPNQGSAEDAIK+VGPTGATGDK+VYCNMETGETCISANPASVPRK+YTVLQDTCSK	113.476					6.04896	13.3919
IPI00626350	Col5a3	COL5A3	collagen type v alpha 3 chain.	1	EKPGGWYSTFR+FSYVDADGSPVNVVQLTFLKLLSAAAHQR+GAQGPPGSAGPR+GDPGPAGPPGPPGSPAEVHGLR+GEIGEKGDSGPSGAAGPPGK+GEPGDAGDAGPPGIPGIPGPK+GFPGPQGAPGDPGPIGLKGDKGPPGPVGANGSPGER+GISGPSGPPGPPGFPGDRGLPGPAGLPGIPGIDGAR+GNAGDIGGPGPPGASGEPGAR+GNMGPTGLPGDLGPPGDPGVPGIDGIPGEK+GNPGPPGPRGEDGPEGQK+GNPGPPGPRGEDGPEGQKGPGGLPGDEGPPGAAGEK+GPAGHSGLPGADGAQGR+GPAGHSGLPGADGAQGRR+GPPGNPGIPGVPGSEGPPGHPGHEGPTGEK+GPVGPSGGIGLPGQSGGQGPIGPAGEK…								2.43785
IPI00134652	Col7a1	COL7A1	collagen alpha-1(vii) chain precursor.	0.99	AGDDGKPGLNGK+EGAPGPLGPPGPPGSAGAPGASGLK+EGAPGPLGPPGPPGSAGAPGASGLKGDK+GDPGDRGPIGLTGR+GEKGDCEDGGPGLPGQPGPPGEPGLR+GEPGAAGIPGEPGAPGK+GEPGAAGIPGEPGAPGKDGIPGFR+GEPGIGVQGPPGPSGPPGMK+GEPGPVGAPGQVVVGPPGAKGEK+GEPGQEGPRGPKGDPGPPGVSGER+GFPGPEGPPGSPGLPGVPGSPGIKGSTGRPGPRGEQGER+GHPGPVGPQGLPGAAGHPGVEGPEGPPGPTGRR+GPPGESVVGAPGAPGTPGER+GSEISVTQTPACSHGPVDVVFLLHATRDNAHNAEAVR+QQVPGVMVLLVDEPLR+SGLDGKPGAPGPPGLHGASGKAGDPG…						3.52448
IPI00118542	Col9a2	COL9A2	collagen alpha-2(ix) chain precursor.	0.87	EALGAAGMVGLPGPPGPPGYPGK+GDVGSQGARGPQGITGPK+GEMGHGHPGMPGPPGIPGLPGRPGQAINGK+GEPGPVGTPGVK+GEPGQQGLPGVSGPPGK+GETGYPGPSGDIGAPGVQGYPGLPGPR+GITGPPGIDGK+GMVGSIGAAGPPGEEGPR+GMVGSIGAAGPPGEEGPRGPPGEAGEKGDVGSQGAR+GSAGQVGRPGSPGHQGLAGVPGQPGTK+GYPGMAGPKGEMGPRGYK+MIQEQLAEVAVSAK+MTAVPAPR+QGPKGEQGPPGIPGPQGLPGIKGDK+QGPNGHPGPR
IPI00318904	Colec10	COLEC10	14 days embryo liver cdna, riken full-length enriched library,clone:4432404o08 product:collectin 34 homolog.	1	FYYIVQEEK+GEKGLLGIPGEKGK+GELGDMGAQGNIGK+GELGDMGAQGNIGKSGPIGK+GVKGELGDMGAQGNIGK+SAAEVCATHTISPGPK+VVGQLDISVAR
IPI00757292	Colec11	COLEC11	collectin sub-family member 11.	1	AIGEMDNQVTQLTTELK+DEAANGLMASYLAQAGLAR+EGAFVYSDR+VFIGINDLEKEGAFVYSDR
IPI00127506	Comp	COMP	cartilage oligomeric matrix protein precursor.	1	CINTSPGFHCEACPPGFSGPTHEGVGLTFAK+DTDLDGFPDEK+ELQETNAALQDVR+MGPTACVLVLALAILR+QVCTDINECETGQHNCVPNSVCVNTR+SCVCAVGWAGNGLLCGR+VPNFDQSDSDGDGVGDACDNCPQK	10.6837		70.6687	3.67117			5.95675
IPI00323600	Coro1a	CORO1A	coronin-1a.	1	ATPEPSGTPSSDTVSR+FMALICEASGGGAFLVLPLGK+KSDLFQEDLYPPTAGPDPALTAEEWLGGR+RATPEPSGTPSSDTVSR							0.968605	0.280835
IPI00605187	Cp	CP	ceruloplasmin isoform a.	1	ADDKVLPGQQYVYVLHANEPSPGEGDSNCVTR+AEDEHLGILGPPIHANVGDK+AEVEDKVYVHLK+AGLQAFFQVR+ALYFEYTDGTFSK+DCNKPSPEDNIQDR+DIASGLIGPLILCK+DIFTGLIGPMK+DLYSGLIGPLIVCR+DLYSGLIGPLIVCRKSYVK+DNEEFLESNK+DTANLFPHK+DVDKEFYLFPTVFDENESLLLDDNIR+EDSACIPWAYYSTVDR+EFYLFPTVFDENESLLLDDNIR+EMGPTYADPVCLSK+EMGPTYADPVCLSKMYYSGVDPTKDIFTGLIGPMK+ETFTYEWTVPK+EYTDGSFTNR+GPDEEHLGILGPVIWAEVGDTIK+GQHPLSIQPMGVSFTAENEGTYYGPPGR+GTFDVECLTTDHYTG…	22.066	16.0192		3.27207		71.6855	7.58005	7.83004	YES
IPI00310049	Cpb2	CPB2	carboxypeptidase b2 precursor.	1	GASSSSCSETYCGLYPESEPEVK+HVDFYIMPVMNVDGYDYTWK+IYIGSSFEK+NAIWIDCGIHAR+SKDHEELSLVASEAVR+YGFLLPER+YIKPTCAEALAAISK+YPLYVLK+YSFTIELR+YTHGSGSESLYLAPGGSDDWIYDLGIK
IPI00128260	Cpn1	CPN1	carboxypeptidase n catalytic chain precursor.	1	AVIQWIR+EALIQFLEQVHQGIK+IHILPSMNPDGYEVAAAQGPNMSGYLVGR+LLLPGTYSVTAK+NFPDLNTYFYYNSK+NGGPNHHLPLPDNWK+SLNFVLSANMHGGAVVANYPYDK+SSSQVYPVQR+TSNSPTPDDELFQTLAK+TVTVTVGPAGPTVVDFQLK+TVTVTVGPAGPTVVDFQLKR+YLYVLEFSDYPGIHEPLEPEVK+YVGNMHGNEVLGR						3.52448
IPI00119522	Cpn2	CPN2	carboxypeptidase n, polypeptide 2 homolog.	1	AAHSQCAYSNPEGTVLLACEESR+ALGLDEGEPAGSWDLTVEGR+EVFCSDEQLADIPPDIPPHITDIVFVETAFTTVR+GAFQSLTGLQMLK+GQLVPNLK+HLEPDAFGGLPR+LAGLPEDLFCHMDILESLQLQGNQLR+LQLLNLSR+LTLDFDR+LVSLTLSHNAITDLPEHVFR+LYNNQISNTHTFCAGPAYLK+NLEQLVK+QEQLICPVNPGHLSFR+TLNLAQNLLTQLPK+VTVSIEAPAAGP+VVFLNTQVR+WLNIQLSSR
IPI00461983	Cramp1l	CRAMP1L	protein cramped-like.	0.94	ASGAPAPPR+DAPCALGSGGASGSGPR+DFEAIQNNIALK+EVLFDGGGGGNPVGDLSQ+IGGCMDDKNATKLNELIQVGATTVR+KDAPCALGSGGASGSGPR+LGDAGSGEEGLKK+QHLDSISIQSDFFSPKPKK
IPI00130792	Crebl1	CREBL1	cyclic amp-dependent transcription factor atf-6 beta.	1	DLDQLFLSSDCR+DPVGQLQLYR+EAAQSPGEQQPSSAGRPSFR+EDTFYVVSFR+LADELSGWVQR+LQAVLADNQQLRR+MSLVMPAMAPNETVSGR+RDHLLLPAISHNK	23.5953		5.97634		23.2761
IPI00314936	Crp	CRP	c-reactive protein precursor.	1	AQGDVFIKPQLWS+ESDTSYVSLEAESK+NSNDILIFWNK+QYTFGVGGAEVR
IPI00125138	Csf1	CSF1	isoform 1 of macrophage colony-stimulating factor 1 precursor.	0.99	AFFLVQDIIDETMR							15.8702
IPI00108003	Csf1r	CSF1R	macrophage colony-stimulating factor 1 receptor precursor.	1	AEAMLGPSLSPGQDSEGDSSYK+ALSLNAVDFQDAGIYSCVASNDVGTR+ASEAGQYFLMAQNK+CTELEDPMAGSTTIHLYVK+DPAHSWNLLAQEVTVVEGQEAVLPCLITDPALK+EDAVLKVAVK+ESTSTGIWLK+GEAAQIVCSATNAEVGFNVILK+IRGEAAQIVCSATNAEVGFNVILK+KLEFITQR+LEIPLNSDFQDNYYK+TVYFFSPWR+VIIQSQLPIGTLK+VLDSNTYVCK
IPI00123744	Cst3	CST3	cystatin-c precursor.	1	ALCSFQIYSVPWK+ALDFAVSEYNK+KALCSFQIYSVPWK+KQLVAGVNYFLDVEMGR+MLGAPEEADANEEGVR+MLGAPEEADANEEGVRR+QLVAGVNYFLDVEMGR+RALDFAVSEYNK+SQTNLTDCPFHDQPHLMR	146.255		389.154		90.1045		4.1654	0.487571
IPI00133547	Cst6	CST6	18-day embryo whole body cdna, riken full-length enriched library,clone:1110017e11 product:cystatin n homolog.	1	AAQAAVASYNMGSDSLYYFR+CNFELLEVPWK+QNLSPTDPR+VSGEHMDLTTCPLAAGGQQEK+YYLTLDIESTECR+YYLTLDIESTECRK			85.0977				5.95675
IPI00110868	Ctbs	CTBS	isoform 2 of di-n-acetylchitobiase precursor.	1	EIEGSQVTFDVAWSPK+EQTQEMWGALKPR+FHQVWYDNPQSISLK+GIGMWNANCLDYSDDALAR+HRPDFEVFVFDVGQK+SYDWSQITTVAAFGK			20.9054	9.01351			1.19135		YES
IPI00322594	Ctgf	CTGF	connective tissue growth factor precursor.	1	CCEEWVCDEPK+DGAPCVFGGSVYR+GLFCDFGSPANR+LPSPDCPFPR+TAVGPALAAYR+YQCTCLDGAVGCVPLCSMDVR	42.9627				50.9151	13.6171	1.48919
IPI00309363	Ctla2a		cytotoxic t lymphocyte-associated protein 2 alpha precursor.	1	GEMAPDLPEYEDLGK+TSFYMGLNQFSDLTPEEFK
IPI00113517	Ctsb	CTSB	cathepsin b precursor.	1	DQGSCGSCWAFGAVEAISDR+EIMAEIYK+EQWSNCPTIGQIR+GENHCGIESEIVAGIPR+HFGYTSYSVSNSVK+LCGTVLGGPK+NFYNVDISYLK+NGPVEGAFTVFSDFLTYK+VAFGEDIDLPETFDAR	1.19487	0.346788	1.20492	1.29161	4.06374	2.25059	0.976009	0.22948	YES
IPI00111013	Ctsd	CTSD	cathepsin d precursor.	1	AIGAVPLIQGEYMIPCEK+DPEGQPGGELMLGGTDSK+FDGILGMGYPHISVNNVLPVFDNLMQQK+MKTPGVLLLILGLLASSSFAIIR+NIFSFYLNRDPEGQPGGELMLGGTDSK+TMTEVGGSVEDLILK	0.55465	0.676237	4.31853	1.05825		2.85781	1.41806	0.716156	YES
IPI00137542	Ctse	CTSE	cathepsin e precursor.	1	AQGQLSEFWR+GNNQVGLAPAVP+QFYSVFDR
IPI00128154	Ctsl	CTSL	cathepsin l precursor.	1	DRDNHCGLATAASYPVVN+FDQTFSAEWHQWK+LFQEPLMLK+LYGTNEEEWR+NLDHGVLLVGYGYEGTDSNK+NSWGSEWGMEGYIK
IPI00309520	Ctss	CTSS	bone marrow macrophage cdna, riken full-length enriched library,clone:i830001d23 product:cathepsin s, full insert sequence.	1	DPTLDYHWDLWK+LISLSAQNLVDCSNEEK+NSWGLNFGDQGYIR+QSPKTVTFR+YIQLPFGDEDALK+YIQLPFGDEDALKEAVATK+YQGSCGACWAFSAVGALEGQLKLK							0.527195	0.152366
IPI00125220	Ctsz	CTSZ	cathepsin z.	1	GDQLALLGR+HGIPDETCNNYQAK+NVNGVNYASVTR+TYPRPHEYLSPADLPK+VGDYGSLSGR			28.5326	3.89489		4.5408	0.574394	0.128308
IPI00133886	Cuta	CUTA	divalent cation tolerant protein cuta isoform 2.	1	GKIEEDSEVLMMIK+LAACVNLIPQITSIYEWK+TQSSLVPALTEFVR	6.62247		5.43606		2.50846
IPI00127811	Cx3cl1	CX3CL1	fractalkine precursor.	1	QAVGLLAFLGLLFCLGVAMFAYQSLQGCPR+SLGSEEINPVHTDNFQER	4.2279						13.3919
IPI00230113	Cyb5	CYB5A	cytochrome b5.	1	EQAGGDATENFEDVGHSTDAR+FLEEHPGGEEVLR
IPI00222419	Cycs	CYCS	cytochrome c, somatic.	1	ADLIAYLK+GITWGEDTLMEYLENPK+GITWGEDTLMEYLENPKK+KTGQAAGFSYTDANK+TGPNLHGLFGR+TGQAAGFSYTDANK	1.58471				1.16381		0.496183	2.00415
IPI00351582	Cyp11b1	CYP11B1	17 days embryo kidney cdna, riken full-length enriched library,clone:i920059j21 product:11 beta-hydroxylase homolog.	0.87	AMSDLPLLR+QESLAAEASIAANPQK+TLQPFEAIPQYSR
IPI00118964	Cypt12		adult male testis cdna, riken full-length enriched library,clone:1700001f04 product:hypothetical protein, full insert sequence.	0.82	RAPEPTTAAAAAR
IPI00225091	D630042P16Rik	C3orf32	uncharacterized protein c3orf32 homolog.	0.99	CSGCHGAGMVR+CSSCSGTK+CSSCSGTKR+QVFFPPLEALGR+RCSTCSGR+VQVPPMFQEDTRK
IPI00454042	D6Wsu176e	FAM3C	protein fam3c precursor.	0.91	CGISKACPEKHFAFK+ICLEDNVLMSGVK+MASGAANVVGPKICLEDNVLMSGVK+MDASLGNLFARSALDSAIR
IPI00122273	Dag1	DAG1	dystroglycan precursor.	1	AASSDPGEVVPSACAADEPVTVLTVILDADLTK+EGAMSAQLGYPVVGWHIANK+HLQFIPVAPPSPGSSAAPATEVPDR+IPSDTFYDNEDTTTDK+KLAFAFGDR+LAGDPAPVVNDIHK+LFDMSAFMAGPGNAK+NQLEASMHSVLSDFQEAVPTVVGIPDGTAVVGR+SWVQFNSNSQLMYGLPDSSHVGK	5.53743	17.0104	20.072	2.39264	82.6791		2.97837
IPI00222430	Dbi	DBI	diazepam binding inhibitor isoform 1.	0.99	QATVGDVNTDRPGLLDLK+TYVEKVDELK	4.8974		3.17029		3.91759		1.80826		YES
IPI00459280	Dcps	DCPS	scavenger mrna-decapping enzyme dcps.	0.91	EQEAEEAETPSTEEK+IVFENPDPSDGFVLIPDLK+TTVVYPATEK							0.869593
IPI00223230	Ddx26b		protein ddx26b.	0.99	GPLSASWFPSCPSLVK+KGMMIDEADEFVVGPQNK+RPGEPNSPMSSKR+SAPAEFMNVSGESFISSQLDSLSDDFTGLRK
IPI00651980	Ddx4	DDX4	adult male testis cdna, riken full-length enriched library,clone:4932703a03 product:dead (asp-glu-ala-asp) box polypeptide 4,full insert sequence.	0.9	DIGESSKK+ELINQIYLEARK+GGCQDGNDSEASGPFR
IPI00224680	Def6	DEF6	differentially expressed in fdcp 6.	0.85	ADGIGSSPLSNQDAFR+EGKRCMFCVK+EHFDELCWTLTAK+GTIPLDAHCCVEVLPDR+LLGSLSLEMGLGK+SLNGGDETPILALASQEEK+WFQLQPSSLCYFGSEECK							3.47837
IPI00318146	Depdc2	DEPDC2	isoform 1 of dep domain-containing protein 2.	1	GSNAEMAGMEVGKK+IAACVNTPCSASGVGLLSVSSELCDR+LGMEQDTWVMISEQGEK+LKNGGGFKIHPVLFSQALESMEGYCYR+LVEKGSNAEMAGMEVGK+QDPWNLPSSIQALAQSIR+RHSDYTAVMEALQAMK+RIAACVNTPCSASGVGLLSVSSELCDR+RWLDQIANAGVLFHFQSLLSPNLK+SHSKPPGDGAGDAFECK+VCVLSELQKTER+YIMQAMDVMR+YIMQAMDVMRK
IPI00128127	Dgkg	DGKG	diacylglycerol kinase gamma.	1	AMLMGVGK+LAQCSSVTIR+MSEEQWVSLSSEEFDQLQK+WGGGYEGGSLTK
IPI00410936	Dhx29	DHX29	putative atp-dependent rna helicase dhx29.	0.99	AAGFSSSPSWEGR+AAVSASRAR+APGAAAMRAAVSASRAR+HKAPGAAAMRAAVSASR+KCNIVCTQPR+KEETTVEVNMK+MLIFGAIFGCLEPVATLAAVMTEK+TQHAILYMNPHKINLDLILELLVYLDK+VCEELGCESGPGGR+VVVVAGETGSGK						1.42891
IPI00131904	Dkk3	DKK3	dickkopf-related protein 3 precursor.	1	DCQPGLCCAFQR+DSECCGDQLCAWGHCTQK+EVEELMEDTQHK+QELEDLER+SAVEEMEAEEAAAK+SHECIIDEDCGPTR+SLAQEMAFEGPAPVESLGGEEEI+YCQFSSFK+YTCQPCRDQQMLCTR	33.279		75.6451		156.933	38.8672
IPI00225503	Dmkn	DMKN	52 kda protein.	1	DIETSNFDEGYSVSR+EAASSGIQNALGQGHGEEGGSTLMGSR+EAVNGLNTMNSDASTLPFNIDNFWENLK+GGGQGNSDNNGSSSSSSGSNSGNSNSGNSGNSNSGNSGNSGSGSR+GNNQNSGCTNPPPSGSHESFSNSGGSSNDGSR+MAGGSGSQGHGSNGGNIQK	4.2279						3.47837
IPI00742396	Dmp1	DMP1	dentin matrix protein 1.	1	KLIVDAYHNKPIGDQDDNDCQDGY+RSHVSEEDYRGELTDSNSR+SEESKGDHEPTSTQDSDDSQSVEFSSR+VGGGSEGESSHGDGSEFDDEGMQSDDPESTR
IPI00273742	Dnahc1	DNAH1	similar to dynein, axonemal, heavy polypeptide 1.	0.98	ASVHDIIEMAIK+DLDEALPALDAALASLR+DNIGEAVIKAIQPYIDNEEFQPAAIAKVSK+EGPSSSSQGPGYCPVK+IDIEVLSVVAQQITTIQK+KALATSMLDILAK+NAYENREVINVCSDQRLLDSLR+NMERESGLDVFK+SWQIAGLPNDTLSVENGVINQFSQR+WYMFDGPVDAVWIENMNTVLDDNK
IPI00622122	Dnahc11	DNAH11	left-right dynein.	0.97	CYITLTQSLHLTMSGAPAGPAGTGK+GFLNTIETALAFGDVILIENLK+GPTYVWTFR+HEVSPLQNAEVTLIR+IPQGHALLIGVGGSGK+IPQGHALLIGVGGSGKQSLSR+KVAAIQTEASQK+LPEEFNMAEIMQKNPNR+LVSELEAK+NCQYVACMNPMVGSFTVNPR+QALAQTNLDLAAATEK+RFIEEIEGIEPQHKDSISLFMAHVHTSVK+SDIPDSALGIFQK+VSQTQSNMLTIQQTMQAWAEWPLLPR+VVSPHAFTWLSQLR
IPI00378509	Dnahc17		novel protein similar to dynein, axonemal, heavy polypeptide 9.	0.99	AWPVMLVGNAGTGKSVLMGDK+EGDYDGLVEVMGHLMK+ISVEVLSVIAVQVK+LENLSTDDYLVQAVPFNFYTTSAMLQGVLEKPLEK+LIYFIDDMNMPEVDK+QSIVELK+SASLFEVTVPDYK+YLNNHVINSLADLESFMNITRTALKKPLK
IPI00462949	Dock11	DOCK11	dedicator of cytokinesis 11.	0.98	DTLYSCAAMPSSASR+ESKGCIYLDACIDVVQCPKMR+EVPGELIKYLK+KLFPSGCSAFKK+LQGCVSVQVNAGPLAYAR+NLLMCYLYIVK+QSVSEAVRGSVVLEK+TEFERNHNINR+TVQSTVPEDAEKR
IPI00556808	Dopey2	DOPEY2	pad-1-like isoform 1.	0.99	DLMNMQSSSLK+EACGESEPQEGAPEER+HQEALIGQSFYGK+ITAQLVSMAK+KSSWDPKPITVPQFK+LSYTQSGNPLISTIK+QHSVSCIR+SLCASLLDANVLVQR+SLFVVLDSLACTDGAISAAAQGWLVR+TCFKVLSKVQMPPSYLDLEPSSGNSSPVK+VLSPSDLTMYLSACK+VQEFVLLSLSASMYTSQK
IPI00134390	Dpep1	DPEP1	dipeptidase 1 precursor.	0.96	LGVMIDLSHVSVATMK+VAGAGAVGLGGDYDGVTMLPVGLEDVSK+VASLIGVEGGHLIDSSLGVLR
IPI00275123	Dpep2	DPEP2	isoform 2 of dipeptidase 2 precursor.	1	ALMQEFPLIDGHNDMPLVLR+LGMMVDLSHVSDAAAR+LTLEQIDLIR+RALEVSQAPVIFSHSAAR+RGWNEQELQGILR+YLTLTHTCNTPWAETSSK
IPI00113848	Dsc1	DSC1	isoform 1a of desmocollin-1 precursor.	1	GFSILLSDGQGQEQK+ILEDGTIYTTHDLLLSSEK+MAVACAAPGSTFSK+QVTLQIGVLNEAQFTNAANAQPPTMCTTTVTVK+SGTSVGQVTAIDK+SPSLILSSDPAFR	7.4558							13.9407
IPI00624693	Dsc3	DSC3	desmocollin 3.	1	ECLSSADGIMPSDPDFR+LLLTLWVFSFVGEACK+NDMYNITVMAIDQEGK+SFTIQLSDSK+VCSANGFTTHTANNSSQGFCGTMGSGMR+VLDDGSVYPTR+VTFHVPSTLEADK	17.1395
IPI00115793	Dsg2	DSG2	desmoglein-2 precursor.	0.96	CALLLLVQLLAVVCLDFGNGLHLEVFSPR+GITEPPFGIFVFDR+GSAVPPSTVLLAPR+TRATGSSRDMSGAR	3.26494	3.59662	1.9909	14.8711		3.52448	15.8702	35.5085
IPI00553419	Dsp	DSP	desmoplakin isoform 1.	0.98	EEMDLMAWGVDAGSVEQHINSHRSIHNTIGDYR+GLPSPYNMSAPGSRSGSR+ILTCPKTK+KGLIDYDTFK+LLEAQLASGGVVDPVNSVFLPK+MSAAEAVK+QMGQPCDAYQK+RLLQLQEQMR+SVEEVASEIQPFLRGAGAIAGASASPKEK+TFYSHSRR+YEMTYSGGGGGGGGGGGGGTSR+YEMTYSGGGGGGGGGGGGGTSRTFYSHSR	10.7407		1.82545	1.94745			0.764525	1.83898
IPI00124308	Dspp	DSPP	dentin sialophosphoprotein.	1	DAEGGIISQSEACPSGK+DGNGSESIHVGGK+DSNGHQGVELDKR+SGGASDVSQNGDATLVQENEPPEASIK+SQVGIVENAEEAESSVHGQAGQNTK
IPI00222750	Dync2h1	DYNC2H1	dynein cytoplasmic heavy chain 2.	0.99	DIESCAQIWALYEEFQQGLQDMAK+EDIATFDARNIPKEIR+EIWSNELSPVLNLWK+EWSDGVLTNSAR+FELMMESHQLMIK+KLFAGINSVCFDEESK+LFAGINSVCFDEESKHITAMK+MLHLLDVIGGSFGRFVQKK+QFFNSSIIDVLNQRNK+QLLKECVTAGR+QNDYVVETSLVGTVMNGLSHLHGCK+SEAGLAFSNTIDFDDAK+SEGLPSDDLSIENALVILQSR+SSECYHQVAMGQGQADLAIQMLK+TLIIQEMDGVEPVLYPLLRR+TVTSLVSHMHGAVLFSPK+TYYHHSMCEQEFPSILAK+VLLSNNVEAWLNDLALEMK+YMTFLHVYSAISSSK+YTSVDTSSEDPGNSESGILELK
IPI00224821	E030013G06Rik	LOC146177	hypothetical protein loc233813.	0.99	EFQNDLTGLIDEQLSLK+EKLYVLSFGVTINPLWPDPMEVSTSTLQELKLWVK+ELNSLVIILR+GPFTSLLPKPPK+LFLFYTEAGNSVGSVYK
IPI00128862	Ear3		eosinophil cationic-type ribonuclease 3 precursor.	0.91	TSLDSPMYPVVPVHLDGTF
IPI00124442	Ear6		eosinophil-associated ribonuclease 6.	0.99	VAWDCPIYPVVPVHLDGTF
IPI00128083	Ear8		ribonuclease 8 precursor (fragment).	1	QNCHNSSSPVHITVCNITSR+RTCKGLNTFLHTSFANAVGVCGNPSGLCSDK+TPQDSPMYPVVPVHLDGTF
IPI00396840	Ece1	ECE1	isoform b of endothelin-converting enzyme 1.	0.96	CPPGSPMNPHHK+LLGGGDEDAIRPQMQQILDFETALANITIPQEKR+SSPNALNFGGIGVVVGHELTHAFDDQGR+TPESSHEGLITDPHSPSR							0.579729	0.406309	YES
IPI00122272	Ecm1	ECM1	isoform long of extracellular matrix protein 1 precursor.	1	AGPAVPQEAIPLQK+AWEGTLDGYCER+CCELPYPEQACCGEEEK+CCELPYPEQACCGEEEKLAFIENLCGPR+DECFAHLAPYPNYDR+DECFAHLAPYPNYDRDILTLDLSR+DILTLDLSR+DILTLDLSRVTPNLMGQLCGSGRVLSK+DPALCCDLSPEDK+EIDPPAQPQEEIVQK+EQPPPQVHIEQK+EVKPHTLAGQLPPEPR+EVQPPSSPEDIPVYEEDWPTFLNPNVDK+LAFIENLCGPR+LDGFPPGRPSPDNLK+LETEFQR+LFQHLHEVGYAAPPSLPQTR+LRVDHSVTSLHDPPLFEEQR+LVWEDAMTQFCEAEFSVK+NLPATDAIQR+NSWKDPALCCDLSPEDK+NVALVAGDTGNATGLGEQGPTR+QGETLNV…	4.2279		145.314	3.67117	82.6791	38.8672	6.69593		YES
IPI00227905	Ecm1	ECM1	isoform short of extracellular matrix protein 1 precursor.	1	AGPAVPQEAIPLQK+CCELPYPEQACCGEEEK+CCELPYPEQACCGEEEKLAFIENLCGPR+DECFAHLAPYPNYDR+DECFAHLAPYPNYDRDILTLDLSR+DILTLDLSR+DILTLDLSRVTPNLMGQLCGSGRVLSK+DPALCCDLSPEDK+EIDPPAQPQEEIVQK+EQPPPQVHIEQK+EVKPHTLAGQLPPEPR+EVQPPSSPEDIPVYEEDWPTFLNPNVDK+LAFIENLCGPR+LDGFPPGRPSPDNLK+LFQHLHEVGYAAPPSLPQTR+LRVDHSVTSLHDPPLFEEQR+LVWEGTLDGYCER+NSWKDPALCCDLSPEDK+NVALVAGDTGNATGLGEQGPTR+QGETLNVLETGYSR+QHVIYGPWNLPQTGYSHLSR+QICLPER+…	4.2279		145.314	3.67117	82.6791	38.8672	6.69593		YES
IPI00222413	Edd1	EDD1	e3 ubiquitin-protein ligase edd1.	0.99	DGNGTIYPMAK+FTCIGALYSELLAVSSK+LAGNTLGSRWSSGVGGSGGGSSGRSSAGAR+TEMGPPPSPASTCSDASSIASSASMPYKR+WSSGVGGSGGGSSGR+YCVFDLATGK
IPI00307837	Eef1a1	EEF1A1	elongation factor 1-alpha 1.	1	IGGIGTVPVGR+LPLQDVYK+SGDAAIVDMVPGKPMCVESFSDYPPLGR+THINIVVIGHVDSGK+THINIVVIGHVDSGKSTTTGHLIYK+VETGVLKPGMVVTFAPVNVTTEVK	0.443337	0.905766	0.54215	1.47945	1.53487	0.61707	0.633677	0.283763
IPI00320208	Eef1b2		elongation factor 1-beta.	1	SIQADGLVWGSSK+SYIEGYVPSQADVAVFEAVSGPPPADLCHALR+TPAGLQVLNDYLADK	0.536464	0.585346	2.61736	0.135969	0.902985	0.177911	1.58702	0.387571
IPI00223457	Efemp1	EFEMP1	egf-containing fibulin-like extracellular matrix protein 1 precursor.	1	CVCPVSNTMCR+CVNHYGGYLCLPK+DIDECDIVPDACK+DIDECDIVPDACKGGMKCVNHYGGYLCLPK+GEQCVDIDECTVPPYCHQR+GSFTCQCLPGYQK+LNCEDIDECR+NPCQDHYVLTSENR+QQCKDIDECDIVPDACK+QTSPVSAMLVLVK+SMATSGVVPGGGFMASATAVAGPEVQTGR+TAQIIVNNEHPQQETPAAEASSGATTGTVAAR+TCQDINECETTNECR+TDQVCINLR	49.4185		200.054	59.7657	38.1269	36.3427	10.9135
IPI00130752	Efna1	EFNA1	ephrin-a1 precursor.	0.96	YTLYMVEHQEYVACQPQSK	49.4185
IPI00788443	EG214403		complement factor h-related protein c precursor.	1	AGQVASCAQPPEIPNGEINGAK+CDNGFSPPSGIFWDYLR+CGPPPPIDNGDITSLSLPEYEPFSSVDYQCQK+CISGTINYPTCE+CQSPYQMNGSDTVTCINGRWIGKPVCK+CTVQGWEPEVPCVR+CVATDQLEK+DKQEYEHSICINGK+GSITCTYYGWSDTPSCYEIECSVPILDR+IPCSQPPTIEHGSIK+IPCSQPPTIEHGSIKLPR+IPEENGVACYMGK+IQCVDGMWTTLPVCVEEER+ISCPPPPQIPNTQVIETTVK+IYVQGQSLK+KISCPPPPQIPNTQVIETTVK+LNDKLDYECLIGYENEYK+LSVLCQDNYLTQDPEEMMCK+LSVLCQDNYLTQDPEEMMCKDGR+LYYEEILRPNFPVSIGNK+NIYSHSGEDI…
IPI00137967	EG434025		ig kappa chain v-v region mopc 41 precursor.	1	ASQDIGSSLNWLQQEPDGTIKR+LIYATSSLDSGVPK
IPI00463393	EG434280		predicted.	0.92	EPALGTGGHYPPYSAGPGTLGPR+EPALGTGGHYPPYSAGPGTLGPRRPAGRK+HRQYAPAAVGTPLGVATR+RHRQYAPAAVGTPLGVATR+SDAGANEPR
IPI00132121	Egf	EGF	pro-epidermal growth factor precursor.	0.89	AWDGKMCLPQDYPILSGENADLSK+IDPDGTNHQQLVVDAGISADMDIHYK+IDPDGTNHQQLVVDAGISADMDIHYKK+QMGMVFALDYDPVESK
IPI00121190	Egfr	EGFR	epidermal growth factor receptor precursor.	1	ACGPDYYEVEEDGIR+ACGPDYYEVEEDGIRK+AVNHVCNPLCSSEGCWGPEPR+CDPSCPNGSCWGGGEENCQK+CNILEGEPR+DTCPPLMLYNPTTYQMDVNPEGK+EISDGDVIISGNR+ESDCLVCQK+FQDEATCKDTCPPLMLYNPTTYQMDVNPEGK+FSNNPILCNMDTIQWR+GPDNCIQCAHYIDGPHCVK+IICAQQCSHR+IPLENLQIIR+KLFGTPNQK+LFGTPNQK+LTQLGTFEDHFLSLQR+NLCYANTINWK+NLQEILIGAVR+NYDLSFLK+NYVVTDHGSCVR+SLKEISDGDVIISGNR+SPSDCCHNQCAAGCTGPR+TCPAGIMGENNTLVWK+TIQEVAGYVLIALNTVER+YCTAISGDLHILPVAFK+YC…	1.00173	2.0292	0.937001	1.94435		6.18416	1.81892	4.24059	YES
IPI00622226	Ehmt1	EHMT1	ehmt1 protein.	0.82	ADTTSTVTLAPGQEK+EGETPLQCASLSSQVWSALQMSKALR+MAADGETNGSCEK
IPI00221581	Eif4b	EIF4B	eukaryotic translation initiation factor 4b.	1	AASIFGGAKPVDTAAR+DGNKVDVVGATQGQAGSCSR+LPKSPPYTAFLGNLPYDVTEDSIKDFFR+VDVVGATQGQAGSCSR	0.357073		0.312334		1.16381	0.428672			YES
IPI00318938	Eif4ebp1	EIF4EBP1	eukaryotic translation initiation factor 4e-binding protein 1.	0.97	AGGEESQFEMDI+FLMECRNSPVAKTPPK+MSAGSSCSQTPSR					1.91712
IPI00421179	Eif4g1	EIF4G1	isoform 1 of eukaryotic translation initiation factor 4 gamma 1.	0.95	EMDEAATAEER+GSSGGSGAKPSDTASEATRPATLNR+IISSVIMTEDIK+ITKPGSIDSNNQLFAPGGR+KVGMLWR+QLEKLLKDGGSNQR	1.09537	0.115018	0.274638	0.846225	0.180122	0.642484	0.892791	2.17552	YES
IPI00108125	Eif5a	EIF5A	eukaryotic translation initiation factor 5a-1.	1	VHLVGIDIFTGK	0.39057	0.163276	1.02644	0.140836	0.671568	0.15987	1.28919
IPI00331234	Enc1	ENC1	ectoderm-neural cortex protein 1.	0.87	EGVSNAAVVSAK+ILQNDGVVTSLCARPR+LFAFGGTSVSHDK+NLHPTNCLGMLLLSDAHQCTK+VQCYDQCENR
IPI00462072	Eno1	ENO1	alpha-enolase.	1	AAVPSGASTGIYEALELR+FMGKGVSQAVEHINK+LAMQEFMILPVGASSFR+LAMQEFMILPVGASSFREAMR+YITPDQLADLYK	0.620988	0.49562	0.869967	0.791483	0.928263	0.628374	2.65774	0.527194	YES
IPI00265144	Enpp2	ENPP2	ectonucleotide pyrophosphatase/phosphodiesterase family member 2precursor.	0.94	CVNVIFVGDHGMEDVTCDR+TFPNLYTLATGLYPESHGIVGNSMYDPVFDATFHLR+VSPGFSQNCLAYK+WWGGQPLWITATK+YDAFLVTNMVPMYPAFK
IPI00223396	ENSMUSG00000041913		12 days embryo female mullerian duct includes surrounding region cdna,riken full-length enriched library, clone:6820416h03product:hypothetical atpase domain of hsp90 chaperone/dnatopoisomerase ii/histidine kinase structure containing protein, fullinsert sequence (fragment).	0.87	ASVCQTIGISSEEK+MAAEGASDPAGLSEGSGR
IPI00223821	Epc2	EPC2	enhancer of polycomb homolog 2.	0.8	LGLNGLAETTVAMEVT+QFIHIQPFNLDNEQPDYDMDSEDETLLNR
IPI00124993	Epha7	EPHA7	isoform 1 of ephrin type-a receptor 7 precursor.	0.81	AQQTELEWISSPPSGWEEISGLDENYTPIR+EVLLLDSK+LFAAVSITTGQAAPSQVSGVMK+MTIDDVMSLGITLVGHQK+TPLGTCSRPLSPLLDQSTPDFTAFCSVGEWLQAIK								3.87571
IPI00130442	Ephb3	EPHB3	ephrin type-b receptor 3 precursor.	0.94	CRGSSGAGGPATCSR+EIDVSCVKIEEVIGAGEFGEVCR+GSGAQQLQEQLPLIVGSTVAGFVFMMVVVVIALVCLR+ILCSIQDMR+LQMNQTLPVQV
IPI00114909	Ephb6	EPHB6	isoform 1 of ephrin type-b receptor 6 precursor.	0.94	ACSSLGVSGGTCR+ASSDPPEAPCTGPPSAPR+ECGGHGEPSSGGMCRR+GDKLCQACPEGSYKALAGNVPCSPCPAR+GDLLFNVVCKECGGHGEPSSGGMCR+LCQACPEGSYKALAGNVPCSPCPAR+WMVAVGGCR
IPI00110616	Eraf		alpha-hemoglobin-stabilizing protein.	1	AMTEFQQELSTLGSQFLAK
IPI00113070	Ercc3	ERCC3	tfiih basal transcription factor complex helicase xpb subunit.	0.84	IIVFADNVFALK+RCGTMSSLSGADDTVYMEYHSSR+SGVIVLPCGAGKSLVGVTAACTVR
IPI00454109	Erf	ERF	ets domain-containing transcription factor erf.	0.97	CPLPPMAPETPPVPSSASSSSSSSSSPFK+DPDEVAR+GSVSDCSDGTSELEEPLGEDPR+LEGGGCLSGGPEDEGEDK+SSGGSGSGGLAEGAGAVAPPPPPPQIK
IPI00754386	Ero1l	ERO1L	ero1-like protein alpha precursor.	0.8	AWGLLVGLLGVVWLLR+ENTFYNWLEGLCVEK+FDGILTEGEGPR	0.108408	0.170602		1.0015		0.336053	0.458211
IPI00138342	Es1		liver carboxylesterase n precursor.	1	AEEVAFWTELPAK+AISESGVVINTNVGK+AISESGVVINTNVGKK+APEEILAEK+DAGVSTYMYEFR+EGASEEETNLSK+EGYLQIGATTQQAQR+EILPLKISEDCLYLNIYSPADLTK+FAPPQPAEPWSFVK+FHSELNISESMIPAVIEK+FHSELNISESMIPAVIEKYLR+FWANFAR+ILSDMFSTEK+ILSDMFSTEKEILPLK+ISEDCLYLNIYSPADLTK+KNIQAVNEIIATLSQCNDTSSAAMVQCLR+LGIWGLFSTGDEHSQGNWAHLDQLAALR+LKAEEVAFWTELPAK+MNEETASLLLR+MNEETASLLLRR+NGNPNGEGLPHWPEYDEK+NGNPNGEGLPHWPEYDEKEGYLQIGATTQQAQR+QEFGWIIPMML…
IPI00131216	Es22		liver carboxylesterase 22 precursor.	0.98	EVAFWTELLAK+FGGDPGSVTIFGESAGGESVSVLVLSPLAK+FWANFAR+LDQMTAMSLLK+NATSYPPMCFQDPVTGQIVNDLLTNR									YES
IPI00381178	Es31		liver carboxylesterase 31 precursor.	1	MVNVFLGIPFAQAPLGPLR
IPI00308075	Ext2	EXT2	exostosin-2.	0.99	EYNELLTAISDSDYYTDDINR					30.7015	21.1959
IPI00331551	F10	F10	nod-derived cd11c +ve dendritic cells cdna, riken full-length enrichedlibrary, clone:f630048g18 product:coagulation factor x, full insertsequence.	1	DGIGGYTCTCSEGFEGK+DTYDYDIAVLR+DWAESTLMTQK+EEQNSVVCSCASGYFLGNDGK+FKNTYYVTGIVSWGEGCAR+LDNGDCDQFCR+LDNGDCDQFCREEQNSVVCSCASGYFLGNDGK+LEDACQGDSGGPHVTR+LKTPITFR+LSTSFSITQNMFCAGYEAK+MLEVPYVDR+MNVAPACLPQK+MNVAPACLPQKDWAESTLMTQK+NCELFVR+NTEKEEGNEMVHEVDVVIK+NTYYVTGIVSWGEGCAR+SCISTAPFPCGK+TGIVSGFGR						3.52448
IPI00119019	F11	F11	coagulation factor xi.	1	CLLFTFMAESSSDDPTK+CTDDAHCQFFTYATGYFPSVDHR+DISFQGGDLSTVFTPSATYCR+ERPGVYTNVAK+NAVHTECWVTGWGYTALR+SCGLSNLACIR+VPLVSNEECQTR+VQEMIIHDQYTTAESGYDIALLK+YNGVWHLVGITSWGEGCGQK+YVDWILEK						8.57344
IPI00330843	F12	F12	factor xii.	1	CFEPQLLK+CPTGYTGYFCDLDLWATCYEGR+DAPDGPTVVLTVDGR+FKDAPDGPTVVLTVDGR+GQAGTTQSGAPCQR+GSEAHCKPVASQACSINPCLNGGSCLLVEDHPLCR+GVISWGSGCGDR+KFKDAPDGPTVVLTVDGR+LCHFPFQYHR+LHEGFSSITYQHDLALLR+NKPGVYTDVANYLAWIQK+NPDNDTRPWCFVWSGDR+QALSWGLGHHAFCR+RPGSRPWCATTPNFDENQQWGYCLEPK+WTVEATYR						3.52448			YES
IPI00402967	F13a1	F13A1	coagulation factor xiii a chain precursor.	1	AVPPNNSNAAEVDLPTEELQGLVPR+CGPASVQAVK+ESFEETLDPFSSK+GAAMVGSDMVVTVEFTNPLK+GTYIPVPVVK+KTLNTEGVVK+LALETALMYGAK+LIASMTSDSLR+LSVQSSPECIVGK+MYVAVWTPYGILR+QDGTHVVEAVDATHIGK+QIGGDGMQDITDTYK+VITNYFSAHDNDANLQMDIFLEEDGNVSSK							1.67398	0.843927
IPI00122117	F13b	F13B	adult male liver tumor cdna, riken full-length enriched library,clone:c730005g24 product:coagulation factor xiii, beta subunit, fullinsert sequence.	1	CEQGAWSSPPVCLEPCTIDVDHMNR+CGGGYSLR+CNEYYLLK+CPPPPVPLNSK+CTAEGWSPNPR+DAYISETSIAGSVLR+DIVAYTCTAGYYTTTGK+GMCASPPVIR+IAQYYYTFK+ILHGDLIDFVCK+KLSFFCLAGYATESGKQEEQIR+LIENGYFHPVK+LSFFCLAGYATESGK+LSFFCLAGYATESGKQEEQIR+LSFQEALR+MSYGCSSGYK+NGDIVSSAAR+QCDFPTVENGR+QGYNLSPSIPLSEISAQCNR+QTGEAECQANGWSLTPQCNK+RLSFQEALR+SFYFPMSVDK+SFYFPMSVDKK+TTGGKDEEVVHCLSAGWSSQPSCR+TYENGSSVEYR+VACEQPPSVENGVAHPHSEIYYSGDK+VHIECELN…
IPI00114206	F2	F2	prothrombin precursor (fragment).	1	DNLSPPLGQCLTER+DTTEKELLDSYIDGR+EECSVPVCGQEGR+ELLDSYIDGR+ENLDRDIALLK+ETFMDCLEGR+ETWTTNINEIQPSVLQVVNLPIVERPVCK+GDACEGDSGGPFVMK+GIAPWQVMLFR+ITDNMFCAGFK+IVEGWDAEK+IVEGWDAEKGIAPWQVMLFR+KPVPFSDYIHPVCLPDK+KSPQELLCGASLISDR+LKKPVPFSDYIHPVCLPDK+LVENFCR+LYQGNLAVTTLGSPCLPWNSLPAK+NPDSSTTGPWCYTTDPTVR+NPDSSTTGPWCYTTDPTVRR+QTVTSLLR+REECSVPVCGQEGR+RGDACEGDSGGPFVMK+SGGSKDNLSPPLGQCLTER+SLKDTTEKELLDSYIDGR+SPQELLCGAS…	7.4558	12.3069	5.97634		23.2761	41.3917			YES
IPI00406603	F5	F5	coagulation factor v.	1	AEVDDVIQVR+AEYEEHLGILGPVIR+ASSADPDQASYPPDSGQASSLPELNR+AWAYYSAVNVER+EFVLLFMVFDEK+EVVVTGIQTQGAK+FNPLVVVGLSR+FSEGASYADHTFPAER+GSYEIIAANGEDTDVDK+KFNPLVVVGLSR+KPSDLPTFSGVGHK+LALHSPLSPR+LDPPIVAR+LLNHSLLLHK+MPMGLSTGVISDSQIK+NPDTIAAWYLR+QFYVAAQGILWNYHPEPTDPSLNSIPSFK+QHVLLFAVFDESK+SEEDIPSELIPLK+SLPDYNQYSK+SSNSGLLGPTLYAEVGDVIK+TLPGSGATVAGTLLR+TSSPDLGQVPLSLDDNQK+TSSPDLGQVPLSPDDNQK+TSSPDLGQVSLSPDDNQK+TTSPDLG…
IPI00307890	F7	F7	coagulation factor vii precursor.	1	GATALELMSIEVPR+ITENMFCAGYMDGTK+LMTQDCLEHAKHSSNTPK+SFSENTLAR+SKNEQLICANENGDCDQYCR+SYVCFCLLDFEGR+TCSCHEDYTLQPDEVSCKPK+VSGWGQLLDR+VTQVIMPDK+WIVTAAHCFDNIR+YWGNITVVMGEHDFSEK
IPI00111807	F8	F8	coagulation factor viii precursor.	1	DMWKSKEK+EDQRGEEPR+EFLISSSQDGHHWTQILYNGK+FSSLYISQFIIMYSLDGK+FSSLYISQFIIMYSLDGKK+IQESNNFLKETKINNPSLAILPWNMFIDQGK+KTNGNNSLNSEQEHSPK+QCQIPLGMASGSIR+SNKSLETTIEVK+VNSEIQEVTALIHDGTLLGK+VTVEQDGFTK
IPI00348266	F9	F9	coagulation factor ix precursor.	1	NCELDATCNIK+SCEPTVPFPCGR+VICSCTEGYQLAEDQK
IPI00230124	Fabp3	FABP3	fatty acid-binding protein, heart.	1	LILTLTHGSVVSTR+QVASMTKPTTIIEK+SLGVGFATR+SLVTLDGGK+WNGQETTLTR
IPI00310035	Fah	FAH	fumarylacetoacetase.	0.98	DIQQWEYVPLGPFLGK+IGVAIGDQILDLSVIK				0.458896					YES
IPI00113223	Fasn	FASN	fatty acid synthase.	1	ACVDTALENLSTLKMK+AKTGGTYGEDLGADYNLSQVCDGK+CILLSNLSNTSHAPK+ELSFAAVSFYHK+EQTAHAFVNVLTR+GETVLIHSGSGGVGQAAISIALSLGCR+KAVAHGDGDTQR+LLLEVSYEAIVDGGINPASLR+LLLPEDPLISGLLNSQALK+LSFFFDFK+MEEVVIAGMSGK+MTPGCEAEAEAEALCFFIK+QAPLLIGSTK+RELSFAAVSFYHK+VSDLLLSTDER	1.0101	3.51582	0.852505	2.34096	0.298359	2.31881	2.0327	2.063
IPI00343214	Fat2	FAT2	ortholog of human and rat fat tumor suppressor homolog 2 (drosophila)fat2.	1	DSGPYGTVDYTIINK+DSYTLVVQASDK+FPPGGYQLTISEDTEVGTTVAELKTR+IISGDAAGVFK+LSEFSPPGSRVALVR+SMDYELMK+TKSSNTALLNREVR+VGASDGVFQATVPVYINTTNANK+YRIISGDAAGVFK+YTLLTPTEK
IPI00230432	Fbln1	FBLN1	isoform c of fibulin-1 precursor.	1	CVDVDECSPPAEPCGK+DCSLPYTSESK+DQTCEPIVMISYQCGLVFR+ENSDFVQGNGADLQDPAK+IPDEEDQEDPYLNDR+ITYYHLSFPTNIQVPAVVFR+SCEDVNECLNSPCSQECANVYGSYQCYCR+SCEDVNECLNSPCSQECANVYGSYQCYCRR+TCVDINECQR	62.3301		563.326	145.243	30.7015	48.9651	4.21756	4.09463
IPI00322748	Fbln1	FBLN1	isoform d of fibulin-1 precursor.	1	AVTPLYPANQADIIFDITEGNLR+CVDVDECSPPAEPCGK+DCSLPYTSESK+DQTCEPIVMISYQCGLVFR+ENSDFVQGNGADLQDPAK+IPDEEDQEDPYLNDR+QVRPIVGPFYAVLK+SCEDVNECLNSPCSQECANVYGSYQCYCR+SCEDVNECLNSPCSQECANVYGSYQCYCRR+TCVDINECQR+YEDGMTVGVVR	62.3301		563.326	145.243	30.7015	48.9651	4.21756	4.09463
IPI00132067	Fbln2	FBLN2	isoform 1 of fibulin-2 precursor.	1	AEEDIDPNSVHSVPR+CACFPGFELQGDGR+CSCAAGFLLAADGK+EGETCGAEDNDTCGVSLYK+EKSCVAGVMGAKEGETCGAEDNDTCGVSLYK+FRAEEDIDPNSVHSVPR+GYHANEEGSECVDVNECETGVHR+QCCDCCGLGLR+QCCISYLK+QGYQLAEDGHTCTDIDECAQGAGILCTFR+SESAQVSPNTIPLPVPQPNTCK+SVMQEGAAPLPR+TTCQDITECQTSPAR+VPAGQSYFVDFGSTECSCPPGGGK			70.6687	14.3558			13.3919
IPI00757848	Fbxl19	FBXL19	similar to f-box and leucine-rich repeat protein 19 isoform 4.	0.98	ETASQGQL+GPEWAAASTGQLR+GPLPAGPTPDDVPGPPK+LPASGAAAASTR+MSSSSRGPGAGAR
IPI00117140	Fcgr2b	FCGR2B	34 kda protein.	1	EDTVTLTCEGTHNPGNSSTQWFHNGR+SQVQASYTFK+TEAENTITYSLLK								11.065
IPI00115690	Fcna	FCN1	ficolin-1 precursor.	1	ELGDTLCQR+GEPGTMGPPGVK+GFGNLGTEFWLGNDYLHLLTANGNQELR+LTLGQFLEGTAGDSLTK+RVDGSIDFFR+VDGSIDFFR+VDLQDFQGK+VVGLGAQDK+VVVIQSCPGFPGPPGPKGEPGSPAGRGER+YLSGSHESYADGINWGTGQGHHYSYK+YSSFQVSEEQEK+YSSFQVSEEQEKYK
IPI00311229	Fem1a	FEM1A	4 days neonate thymus cdna, riken full-length enriched library,clone:b630016n13 product:feminization 1 homolog a (c. elegans), fullinsert sequence.	0.91	AIAIILHLLYLLEK+MQALLIR
IPI00469387	Fetub	FETUB	gugu alpha.	1	AMFHINKPR+AMNQWVSGPAYYVEYLIK+AMNQWVSGPAYYVEYLIKEAPCTK+DGYMLSLNR+DQKDGYMLSLNR+EHYQEDMGSLFYLTLDVLETDCHVLSR+ENNPLVLPP+GGSPEEAFPVQLDLTTNPQGDTLDVSFLYLEPGDK+GGSPEEAFPVQLDLTTNPQGDTLDVSFLYLEPGDKK+GSIQHLPELDDEKPEESK+HVPLIQPVEK+KLVVLPFPGK+KTHTTCPDCPSPIDLSNPSALEAATESLAK+LVVLPFPGK+LVVLPFPGKEQR+MFYESVYGQCK+RVLYLPAYNCTLRPVSK+SAECPGPEK+SAECPGPEKENNPLVLPP+SQASCSLQHSDSEPVGICQGSTVQSSLR+SVTVTCEFFESQAQVPGDENPAVTQGPQ…
IPI00115522	Fga	FGA	fibrinogen, alpha polypeptide.	1	AENPTNPGPGGSGYWRPGNSGSGSDGNR+AQLIDMK+AQQIQALQSNVR+AVNREINLQDYEGHQK+DGGSRGDSPGDSR+DRQYLPALK+DSDWPFCSDDDWNHK+EINLQDYEGHQK+EKVTSSGTSTTHR+EVITSDDGSDCGDATELDISHSFSGSLDELSER+EVVKEVITSDDGSDCGDATELDISHSFSGSLDELSER+GDFANANNFDNTYGQVSEDLR+GDFANANNFDNTYGQVSEDLRR+GDKELLIGK+GEFLSEGGGVR+GLIDEANQDFTNR+HPDLSGFFDNHFGLISPNFK+HPDLSGFFDNHFGLISPNFKEFGSK+HQSQCK+LEVDIDIK+LKNSLFDFQR+MADEAGSEAHR+MADEAGSEAHREGETR+MELERPGK+…		34.9208		1.22372		3.69931	1.03809	0.705244	YES
IPI00279079	Fgb	FGB	fibrinogen beta chain precursor.	1	AHYGGFTVQNEASK+AHYGGFTVQNEASKYQVSVNK+DNDGWVTTDPR+DNDGWVTTDPRK+ECEEIIR+EDGGGWWYNR+EEPPSLRPAPPPISGGGYR+ENENVINEYSSILEDQR+ENENVINEYSSILEDQRLYIDETVNDNIPLNLR+GFGNIATNEDAK+GFGNIATNEDAKK+GGETSEMYLIQPDTSIKPYR+GSWYSMR+HGTDDGVVWMNWK+IQKLESDISAQMEYCR+IRPFFPQQ+KEEPPSLRPAPPPISGGGYR+KGFGNIATNEDAKK+KGGETSEMYLIQPDTSIKPYR+KQCSKEDGGGWWYNR+KYCGLPGEYWLGNDK+KYCGLPGEYWLGNDKISQLTR+LESDISAQMEYCR+LYIDETVNDNIPLNLR+MGPTELL…	4.2279	102.762		51.7522		3.52448	0.306279	0.458749	YES
IPI00130549	Fgfr1	FGFR1	isoform 1 of basic fibroblast growth factor receptor 1 precursor.	0.84	EGHRMDKPSNCTNELYMMMR+IGPDNLPYVQILK+QVTVSADSSASMNSGVLLVRPSR+RPVAPYWTSPEK+RQVTVSADSSASMNSGVLLVRPSR	20.3674				15.8507
IPI00122312	Fgg	FGG	adult male liver tumor cdna, riken full-length enriched library,clone:c730002j02 product:fibrinogen, gamma polypeptide, full insertsequence.	1	AIQVYYNPDQPPKPGMIDSATQK+AKQQFLVYCEIDGSGNGWTVLQK+CHAGHLNGVYHQGGTYSK+DCQEIANK+DNCCILDER+DSVQIHDTTGKDCQEIANK+EGFGHLSPTGTTEFWLGNEK+ESGLYFIRPLK+FEGNCAEQDGSGWWMNK+FGSFCPTTCGIADFLSSYQTDVDNDLR+IDGSLDFK+IDGSLDFKK+IHLISMQSTIPYALR+IQLKDWNGR+KMVEEIVKYEALLLTHETSIR+LSIGEGQQHHMGGSK+LTYAYFIGGDAGDAFDGYDFGDDPSDK+MVEEIVKYEALLLTHETSIR+NWIQYK+QQFLVYCEIDGSGNGWTVLQK+QQFLVYCEIDGSGNGWTVLQKR+QVSVDHEVEIEY+RIDGSLDFK+SSTTNGF…		97.1088		3.17117			1.06777	1.12527	YES
IPI00121312	Fgl1	FGL1	mfire1.	1	EVQFLDK+GSENSFIDLGGK+IKPLQSLAEFSVYCDMSDGGGWTVIQR+QQQTMIAQLLHEK+QQQTMIAQLLHEKEVQFLDKGSENSFIDLGGK+QYADCSEIYNDGFK
IPI00310797	Fgl2	FGL2	fibroleukin precursor.	1	CEGSQCPFQLTLPTLTIQLPR+DQIQGLQGR+LETLHLVNMNNIENYVDNK+QLGSMEEVLK+VQELESQVNK+VTPDHRNSSFEVYCDMETMGGGWTVLQAR
IPI00553334	Fhad1	FHAD1	forkhead-associated (fha) phosphopeptide binding domain 1.	0.98	EEASQDLTAGPPLDSGDK+EIACDHLIDDLLMAQKEILSQQEIIMK+EILSQQEIIMKLR+IMSQSQDLQAQMNASR+MILTDDRLK+VAQTTGLMEK
IPI00273133	Flt4	FLT4	vascular endothelial growth factor receptor 3 precursor.	1	CPVAGAHVPSIVWYK+CPVAGAHVPSIVWYKDER+ERLHLGRVLGHGAFGK+ESGIDLADSNQR+EVTEASAGVYTLALWNSAAGLR+EVTTQDAVNPIESLDSWTEFVEGK+GPVLEATAGDELVK+HATLSLNIPR+KYLSVQALEAPR+LIYFYVTTIPDGFSIESEPSEDPLEGQSVR+LNLSTLHDAQGNPLLLDCK+LTQNLTDLLVNVSDSLEMR+LVIQDANVSAMYK+NVHLFATPLEANLEEAEPGAR+SQSSALHPDGQEVLWDDR+VAPEDEGDYVCEVQDR+YLSVQALEAPR
IPI00113539	Fn1	FN1	fibronectin precursor.	1	APITGYIIR+ATGVFTTLQPLR+CDPHEATCYDDGK+CDPHEATCYDDGKTYHVGEQWQK+CDPIDQCQDSETR+CHEGGQSYK+CTCVGNGRGEWACIPYSQLR+DLEVIASTPTSLLISWEPPAVSVR+DSMIWDCTCIGAGR+DTLTSRPAQGVITTLENVSPPR+DTLTSRPAQGVITTLENVSPPRR+EATIPGHLNSYTIK+EESPPLIGQQATVSDIPR+EINLSPDSSSVIVSGLMVATK+ESNPLTAQQTTK+EVTSDSGSIVVSGLTPGVEYTYTIQVLR+EVVPRPRPGVTEATITGLEPGTEYTIYVIALK+EYLGAICSCTCFGGQR+FGFCPMAAHEEICTTNEGVMYR+FLTTTPNSLLVSWQAPR+FTNIGPDTMR+GDSPAS…	13.9116			129.216	117.793	93.9343	4.66768	2.44562	YES
IPI00352163	Fn1	FN1	nod-derived cd11c +ve dendritic cells cdna, riken full-length enrichedlibrary, clone:f630118j10 product:fibronectin 1, full insert sequence.	1	APITGYIIR+ATGVFTTLQPLR+CDPHEATCYDDGK+CDPHEATCYDDGKTYHVGEQWQK+CDPIDQCQDSETR+CHEGGQSYK+CTCVGNGRGEWACIPYSQLR+DDKESAPISDTVVPAVPPPTDLR+DLEVIASTPTSLLISWEPPAVSVR+DSMIWDCTCIGAGR+DTLTSRPAQGVITTLENVSPPR+DTLTSRPAQGVITTLENVSPPRR+EATIPGHLNSYTIK+EESPPLIGQQATVSDIPR+EINLSPDSSSVIVSGLMVATK+ESAPISDTVVPAVPPPTDLR+ESNPLTAQQTTK+EVTSDSGSIVVSGLTPGVEYTYTIQVLR+EVVPRPRPGVTEATITGLEPGTEYTIYVIALK+EYLGAICSCTCFGGQR+FGFCPMAAHEEIC…	13.9116			129.216	117.793	93.9343	4.66768	2.44562	YES
IPI00268673	Frap1	FRAP1	isoform 1 of fkbp12-rapamycin complex-associated protein.	0.97	AALPPKDFAHK+AMGPGIQQDIK+ARDLLDAELTAMAGESYSR+DLLDAELTAMAGESYSR+ELLEPMLAVGLSPALTAVLYDLSR+LTRMLTNAMEVTGLDGNYR+LYLPQLIPHMLR+NLLPSSDPVVMEMASK+SCWALAQAYNPMAR+SLAVMSMVGYILGLGDR+SSQGDALASGPVETGPMK+TAAFQALGLLSVAVR+TDSYSAGQSVEILDGVELGEPAHK+TLVLLLGVDPSR				9.01351
IPI00226434	Frem1	FREM1	isoform 1 of fras1-related extracellular matrix protein 1 precursor.	0.85	GYPMDSAFVGVEVNQVSATVGK+KAEISMAVGDTR+LIGYPVPGFLQR+LLQFDPGMSTK+NGCYGIYITSR+NGTDTIYNYHGIVSLK
IPI00655016	Fry	FRY	337 kda protein.	0.93	CMMLTNVQMLNK+DGEPPMPVTGAVLPSGNTLR+DMPLNIFVK+EDVLFGFTNFLLR+EIYEVSMQLMQACIILEAK+EQSPYVVQSIISLIMGMK+GPHCSVLHAVEGFALVLLCSFQVATRK+KSTGQLNVNPGTPGSGGGGGGSGNTTTAER+NSELIPNGSSHR+QFNMEVLK+SASPVGNGYIKPPVPPASGTHR+TLTEEEAKMIGMSLYYSQVR
IPI00556878	Fstl1	FSTL1	follistatin-like 1.	1	CALEDETYADGAETEVDCNR+CLNPSFNPPEKK+CVCSCGHWVCTAMTCDGK+GVQTHTEEEKTGYVQELQK+ICANVFCGAGR+ICANVFCGAGRECAVTEK+KCALEDETYADGAETEVDCNR+LIQWLEAEIIPDGWFSK+LSFQEFLK+TGYVQELQK	24.6586		175.172		134.657		18.3486
IPI00110202	Fstl4	FSTL4	follistatin-related protein 4 precursor.	0.88	EGLPSPGLSASCGK+GPWLHVQEVTVR+REGLPSPGLSASCGK
IPI00608020	Ftl1	FTL	ferritin light chain 1.	1	ALFQDVQKPSQDEWGK+KMGNHLTNLRR+LLEFQNDR+NLNQALLDLHALGSAR+QNYSTEVEAAVNR+TQEAMEAALAMEK+VAGPQPAQTGAPQGSLGEYLFER
IPI00108584	Fxyd2	FXYD2	na/k-atpase gamma subunit splice variant a1.	0.92	GTENPFEYDYETVR+KGGLIFAGLAFVVGLLIILSKR
IPI00750988	Gas1	GAS1	growth arrest specific 1.	0.99	AGAAGGEQPLDDDDGLARPGGGAAAAGGR+GGADAPGPAGAFPASAASSPR+MDEDAHAR+RPLLPAMLAALLGGAGAR+TGTLPGALLCLMALLQLLCSAPR+TSSVGPGAGAGSVMGCTEAR								8.18927
IPI00119514	Gata4	GATA4	transcription factor gata-4.	1	DGTGHYLCNACGLYHK+EAAAYGSGGGAAGAGLAGR+TEPGLSSHYGHSSSMSQTFSTVSGHGPSIHPVLSALK
IPI00126184	Gc	GC	vitamin d-binding protein precursor.	1	CCESTSEDCMASELPEHTIK+CCSINSPPLYCSSQIDAEMIDTLQS+DKVCNELAMLGK+DLCGQSTTQAMDQYTFELSR+DYEKDKVCNELAMLGK+ECCDTQDSVACFSTQSPLLK+ECCDTQDSVACFSTQSPLLKR+EDFRSLSLILYSR+EVVSLTEECCAEGADPTCYDTR+FEECCQENTPMNIFMCTYFMPAAEPLQLPAIK+FSSSTFEQVNQLVK+GFADQFLYEYSSNYGQAPLPLLVAYTK+GQEMCADYSENTFTEYK+GQEMCADYSENTFTEYKK+GRDYEKDK+HLSLLTTMSNR+ICQNLSK+KFSSSTFEQVNQLVK+KLCMAALSHQPQEFPTYVEPTNDEICEAFR+LAQKVPTANLENVLPLAEDFTEILSR+LCMAA…	68.7859	12.3069	70.6687		82.6791	21.1959	0.850964	0.348265	YES
IPI00125268	Gdf2	GDF2	growth/differentiation factor 2 precursor.	0.89	RSTGASSHCQK+VNFEDIGWDSWIIAPK
IPI00118190	Gdf7	GDF7	isoform 2 of growth/differentiation factor 7 precursor.	1	AAGAGPAWSPGGGGGGRTLAR+APVAAASGHGR+GAQGSGGGGGGGGGGGGGGGGGGGGAGR+GAQGSGGGGGGGGGGGGGGGGGGGGAGRGHGR+RTALAGTRGAQGSGGGGGGGGGGGGGGGGGGGGAGR+TALAGTRGAQGSGGGGGGGGGGGGGGGGGGGGAGR+TALAGTRGAQGSGGGGGGGGGGGGGGGGGGGGAGRGHGR+WEAFDVTDAVQSHR
IPI00114963	Gdf8	GDF8	growth/differentiation factor 8 precursor.	1	ANYCSGECEFVFLQK+DFGLDCDEHSTESR+MSPINMLYFNGK
IPI00129243	Ggh	GGH	isoform i of gamma-glutamyl hydrolase precursor.	0.97	FFNILTTNTDGK+TSFYLAEFLVSEAR	2.18527	0.221782	8.48162	2.2501	4.65522	6.25876
IPI00420791	Ggt6	GGT6	gamma-glutamyltransferase 6.	0.99	DNLDDTEADMLGMVASGISR+GVLFTTPGPSAGPELVELLESTLHSR
IPI00275524	Ghr	GHR	isoform 2 of growth hormone receptor precursor.	1	GDIQVSWQPPPNADVLK+SNSQHPHQEIDNHLYHQLQR+SPELETFSCYWTEGDNPDLK+TPGSIQLYYAK+VIFPQTNILEACEEGTK+VMGPIWLTYCPVYSLR
IPI00111663	Ghrl	GHRL	isoform 1 of appetite-regulating hormone precursor.	1	FLQDILWEEVK+FNAPFDVGIK+GQAEETEEELEIR
IPI00187462	Gimap4	GIMAP4	gtpase, imap family member 4 isoform a.	0.8	FFQEVMHEFQNR+MEVQCGGAGFIPESSR+TGAGKSSTGNSILGEKVFNSGICAK+YVALTSPGPHALLLVVPLGR								1.68785	YES
IPI00470095	Git1	GIT1	arf gtpase-activating protein git1.	0.99	AEHTLMGPGGSTHR+AEVCADCSAPDPGWASISRGVLVCDECCSVHR+DDDGVTAK+EDELHPELESLDGDLDPGLPSTEDVILK+EFATLIIDILSEAKR+QPPGPVPPPSLPSER+SAVPFLPVNPEYSATR+YQMLAFVHK
IPI00118859	Gja9	CX36	gap junction alpha-9 protein.	0.81	DPAESIGGPGGTGGGGSGGSK+DPAESIGGPGGTGGGGSGGSKR+DPAESIGGPGGTGGGGSGGSKREDK
IPI00133076	Gkn1	GKN1	gastrokine-1 precursor.	1	CYTADILWILR+DAMPSLQDLDTMVK+DLMYSVNPTR
IPI00137018	Gle1l	GLE1L	nucleoporin gle1.	0.94	CVLAFEDLTSSK+EDYFPRIEAITSSGQMGSFIRLK+ELLSVDLAAFQTR+YEDVLEECMSLPK
IPI00321734	Glo1	GLO1	lactoylglutathione lyase.	1	GLAFIQDPDGYWIEILNPNK+VLGLTLLQK	0.391681		0.964313	0.198198	3.39142		0.434797
IPI00129509	Glycam1	GLYCAM1	sulfated 50 kda glycoprotein precursor.	1	DNVVIESTKPENQEAQDGLR+IIEGFVTGAEDIISGASR
IPI00119095	Gm2a	GM2A	ganglioside gm2 activator precursor.	0.93	SLTIQPDPIVVPGDVVVSLEGK	1.24263		8.46056		4.21269
IPI00345164	Gm347	KIAA0649	gene model 347.	0.99	AQVGSPQPAQGPLSSPGPSGQPGIPK+EESPGSAQPNALPEAHR+ETQPGHNPVFGSPHLLMK+GATSQAGAPPSLSSGPR+MGGTGGEDATPAFLLRR+NSSAKASPPSRK+NTEPQGGPAKPEMPCR+TILPAPMEGSDRPPSR
IPI00356750	Gm94	MGC23985	hypothetical protein loc225443.	1	GSSFMELEGDPGQQPSK+SMSRGSSFMELEGDPGQQPSK
IPI00653569	Gm98	C11orf9	hypothetical protein loc225908 isoform 2.	1	AQTPPWHPPGAPSPGLLQDSDSLSGSYLDPNYQSIK+GFNFSVGDDAFVCQK+HSGPGQMAPLPVTNIR+MEVVDETEALQR+NSPSFNLQSR+SLEPLASPVVPFPGGQSK+SWGISANGISYSK
IPI00225889	Gnptg	GNPTG	isoform 2 of n-acetylglucosamine-1-phosphotransferase subunit gammaprecursor.	1	GLGLETLDNCRK+VLFEDAGYLK+VVEEPNTFGLNNPFLPQASR+WDQVEQDLADELITPQGYEK
IPI00128905	Golph2	GOLPH2	golgi phosphoprotein 2.	1	AVLVNNITTGEK+DLQDQLK+EKQAALAGNDRNINVLNADAQK+FSYDLNQCISQMTEVK+GIINVPVGSER+IQSSHSFQLENVNK+LQEEVPSEEQMPQEK+NINVLNADAQK+NPGDEYDMDENEAESER+SYSSLQQDIFQFQK
IPI00269029	Golph4	GOLPH4	golgi phosphoprotein 4.	1	DAGFQALEEQNQVEPR+LTGELQEVQPNHEAGPR+QELREPGHQEGDPEVEADR
IPI00230204	Got1	GOT1	aspartate aminotransferase, cytoplasmic.	1	IANDNSLNHEYLPILGLAEFR+IVAATLSDPELFK+NLDYVATSIHEAVTKIQ+NTPIYVSSPTWENHNAVFSAAGFK+TDESQPWVLPVVR+VGGVQSLGGTGALR	0.86915	0.347262	1.04703	0.255821	2.08286	0.121534	1.68702		YES
IPI00136164	Gp1ba	GP1BA	platelet glycoprotein ib alpha chain precursor.	1	CANLDNAPVYSYPGK+CELTSLQTNGK+ELPSGLLDGLEDLDTLYLQR+HWLQENANNVYLWK+LENLDLSHNNLK+LGSLSPGVLDGLSQLQELYLQNNDLK+QGVDVKDTTPNVASVR+VTSLLEVNCENK+VTSLLEVNCENKK
IPI00331407	Gp5	GP5	platelet glycoprotein v precursor.	0.98	LYWGLYILLLVAQAIIAAFIVFAMIK+MDQGILRNHSFSGMTVLQR+MVLLEQLFLDHNALR+NLQELGLNQNQLSFLPANLFSSLR						16.1469
IPI00621831	Gp6	GP6	platelet glycoprotein vi precursor.	1	ALQRPLPPLPLA+CQSPYSFDEFVLYK+YEDQDFLFIPTMER
IPI00225715	Gpld1	GPLD1	glycosylphosphatidylinositol specific phospholipase d1.	1	AQYVLTSPEASSR+DVLVDCTYLQFLEMHGEMFAVSK+ELILEHQDAYQAGTVFPDAFYPSICK+ELLTLEEADWK+FGSSLVSVR+FGSVLHLTDLDDDGLDEIIMAAPLR+GIVATFYSHPR+GVFYSTGSWAPESVTFMYQTLER+ITDVTSGLLGGEDGR+IYDNLYGR+LGTSLSSGYVR+LSGALHVYSFSSD+MAFLTMTLHQGGATR+MAFLTMTLHQGGATRMYELAPEKTQPALLSTFSGDR+MYELAPEK+NLNHVSSPSASYTLSVPYAR+NQVVVAAGR+QSTITISGDK+RNDKELLTLEEADWK+SLLLIGSPTWK+SWMTPCPEEK+TQPALLSTFSGDR+VYGYFLPNR+VYIYNGMYTTLGDMTGK
IPI00118976	Gpr27	GPR27	probable g-protein coupled receptor 27.	0.99	AAAAAGTPPGALGCK+ALACLPAVMLAAR+GPTPPALVGIRPAGPGR+MANASEPGGGGSGGGAEAAALGLR+RAAAAAGTPPGALGCK
IPI00319652	Gpx1	GPX1	glutathione peroxidase 1.	1	DYTEMNDLQK+FLVGPDGVPVR+FLVGPDGVPVRR+GLVVLGFPCNQFGHQENGKNEEILNSLK+LSAAAQSTVYAFSARPLTGGEPVSLGSLR+NALPTPSDDPTALMTDPK+NDIAWNFEK+TIDIEPDIETLLSQQSGNS+YIIWSPVCR+YVRPGGGFEPNFTLFEK									YES
IPI00133536	Gpx3	GPX3	glutathione peroxidase 3 precursor.	1	FLVGPDGIPVMR+FYTFLK+LFWEPMK+MDILSYMR+NSCPPTAELLGSPGR+QEPGENSEILPSLK+SKTDCHGGMSGTIYEYGALTIDGEEYIPFK+TDCHGGMSGTIYEYGALTIDGEEYIPFK+WNFEKFLVGPDGIPVMR+YVRPGGGFVPNFQLFEK
IPI00128335	Gpx6	GPX6	glutathione peroxidase 6 precursor.	0.85	YVRPGGGYVPNFQLFEK
IPI00480321	Grlf1	GRLF1	glucocorticoid receptor dna-binding factor 1.	0.91	CIEYIEATGLSTEGIYR+IVMCLMCGDPFSADDVLSPVLQSQTCK+NHNENWPSVSRKMQASPEYQDYVYLEGTQK+SSHCGSSNSVLLELPIGLHKK+VSAVSKPVLYR
IPI00110402	Grm1	GRM1	isoform 1 of metabotropic glutamate receptor 1 precursor.	0.95	ARVVVCFCEGMTVR+DEKDGLNRCLPDGQTLPPGR+ELAAQEGLCIAHSDK+GLLSAMRR+KVLLAGASSQR+VEAMFHTLDK
IPI00124640	Grn	GRN	osteoclast-like cell cdna, riken full-length enriched library,clone:i420031m06 product:granulin, full insert sequence.	1	AVCCEDHIHCCPAGFQCHTEK+AVSLPFSVVCPDAK+CDMEVSCPEGYTCCR+CVSPTGTHTLLK+DPVPRPLL+DSAGVWACCPYLK+DVDFIQPPVLLTLGPK+GDTMVAGLEK+GSWACCQLPHAVCCEDR+GTCEMGILQVPWMK+GVSCGDGYHCCPQGFHCSADGK+HCCPGGFHCSAR+LNTGAWGCCPFAK+LPDPQILK+QHCCPAGYTCNVK+QTTPLQIGDIGCDQHTSCPVGQTCCPSLK+SDTPCDDFTR+TCEKDVDFIQPPVLLTLGPK+TQCPDDSTCCELPTGK+VGNVECGEGHFCHDNQTCCK+VHCCPHGASCDLVHTR+WDMFLR+WDMFLRDPVPRPLL	14.6922		45.787		8.53376	0.288046	1.91463		YES
IPI00117167	Gsn	GSN	isoform 1 of gelsolin precursor.	1	AGKEPGLQIWR+AQVHVSEEGGEPEAMLQVLGPKPALPEGTEDTAK+ATEVPVSWDSFNNGDCFILDLGNNIYQWCGSGSNK+DGGQTAPASIR+DPDQTDGPGLGYLSSHIANVER+DSQEEEKTEALTSAK+EPAHLMSLFGGKPMIIYK+EPAHLMSLFGGKPMIIYKGGTSR+EPGLQIWR+EVQGFESSTFSGYFK+FDLVPVPPNLYGDFFTGDAYVILK+HVVPNEVVVQR+IEGSNKVPVDPATYGQFYGGDSYIILYNYR+MDAHPPR+NWRDPDQTDGPGLGYLSSHIANVER+QANMEER+QTQVSVLPEGGETPLFK+RTPITVVR+SEDCFILDHGR+SGALNSNDAFVLK+SQHVQVEEGSEPDAFWEALGGK+TASDFISK+TP…	0.782635	0.153232	1.37233	0.379402	8.42537	18.6714	0.773885	0.307178
IPI00111359	Gsr	GSR	isoform mitochondrial of glutathione reductase, mitochondrialprecursor.	1	ADFDNTVAIHPTSSEELVTLR+ALGVGAAPSLR+ALLTPVAIAAGR+ALTCAMASPGEPQPPAPDTSSFDYLVIGGGSGGLASARR+IYSTAFTPMYHAVTTR+IYSTAFTPMYHAVTTRK+KPTTTMIPDVDCLLWAIGR+LGGTCVNVGCVPK+LNTIYQNNLTK+NFDSLISSNCTEELENAGVEVLK	1.17764	0.396997	0.547634	0.717792			1.72529	1.30531	YES
IPI00114285	Gsto1	GSTO1	glutathione transferase omega-1.	1	EALENEFK+EYLNLYLQDSPEACDYGL+GSAPPGPVPEGQIR+HEVININLK+LWMAAMQQDPVASSHK+LWMAAMQQDPVASSHKIDAKTYR+NPLGLVPVLENSQGHLVTESVITCEYLDEAYPEK+VPPLIASFVR	0.969876		1.04527		1.02338	0.369931	1.73919		YES
IPI00403414	Gtf3c1	GTF3C1	isoform 1 of general transcription factor 3c polypeptide 1.	0.99	ALATHPGISFYEEPR+CTMVEAFSR+DGLDTSSSSELNAPFDPHSMDSHSGDIAVIEEVR+EVVDEGLVPGDGLGAAGLDSSFYAHLK+GVPPVDIVFER+LCYMGLLQFGPTEK+RGEHPEAK+RPMPLGSGGSGR+RVSHSQGPK+VVSLPLQEIHPECGPCK+YISCVFAEESDLSR
IPI00113828	Guca2b	GUCA2B	guanylate cyclase activator 2b precursor.	1	RSGLLPAVCHNPALPLDLQPVCASQEAASTFK+SGLLPAVCHNPALPLDLQPVCASQEAASTFK+YHGFQVQLESVK
IPI00114493	H2-Ea	HLA-DRA	h-2 class ii histocompatibility antigen, e-k alpha chain precursor.	0.99	ENVVCALGLFVGLVGIVVGIILIMK+FFFIAVLMSSQK+LEEFAKFASFEAQGALANIAVDKANLDVMK+MATIGALVLR
IPI00110807	H2-K1		h-2 class i histocompatibility antigen, k-d alpha chain precursor.	1	DYIALNEDLK+GYQQFAYDGR+MAPCTLLLLLAAALAPTQTR+TWTAADTAALITR+WAAVVVPLGK
IPI00473538	H2-K1		mhc class i heavy chain h2-k.	0.99	DYIALNEDLK+FDSDAENPR+FISVGYVDDTQFVR+GYQQFAYDGR+TWTAADMAALITR+WASVVVPLGK+WMEQEGPEYWER
IPI00654993	H2-L		h-2d cell surface glycoprotein (fragment).	0.99	APWMEQEGPEYWER+DYIALNEDLK+FDSDAENPR+GGDYALAPGSQSSEMSLR+GYQQYAYDGR+TWTAADMAAQITR+VYHEGLPEPLTLR+WASVVVPLGK+WEPPPSTDSYMVIVAVLGVLGAMAIIGAVVAFVMKRR
IPI00321666	H2-Q10		h-2 class i histocompatibility antigen, q10 alpha chain precursor.	1	AKGNEQSFHVSLR+APWMEQEGPEYWER+APWMEQEGPEYWERETQR+AYLEAECVEWLLR+DYIALNEDLK+FDSDAETPR+FIIVGYVDDTQFVR+FIIVGYVDDTQFVRFDSDAETPR+GNEQSFHVSLR+GYLQYAYDGR+GYLQYAYDGRDYIALNEDLK+KWEQAGAAEYYR+RKWEQAGAAEYYR+TDPPKTHVTHHPGSEGDVTLR+THVTHHPGSEGDVTLR+TWTAADVAAIITR+WASVVVPLGK+WEPPPSTDSIMSHIADLLWPSLK+WEQAGAAEYYR+YFETSVSRPGLGEPR+YLELGKETLLR
IPI00469893	Habp2	HABP2	isoform 2 of hyaluronan-binding protein 2 precursor.	1	CKDNPCVHGDCLITQK+DEIPHNDIALLK+DGTYYVYGIVSWGQECGK+DNPCVHGDCLITQK+FCEIGPDDCYVGDGYSYR+FLNWIK+FTCACPDQYK+GDTFSCSCPAPFSGSR+KPGVYTQVTK+LIANPLCNSR+LKPVGGHCALESR+NPDGDHKPWCFVK+TVCLPSDPFPSGTECHISGWGVTETGEGSR+VLPACRPNPCQNGGVCSR+VVLGDQDLK+YSQYNERDEIPHNDIALLK
IPI00115866	Hagh	HAGH	hydroxyacylglutathione hydrolase.	1	EKTVQQHAGETDPVTTMR+TVQQHAGETDPVTTMR+VYCGHEYTVNNLK	1.14263						5.95675		YES
IPI00110658	Hba-a2	HBA1	13 days embryo liver cdna, riken full-length enriched library,clone:2510040b16 product:hemoglobin, beta adult major chain, fullinsert sequence.	1	FLASVSTVLTSK+IGGHGAEYGAEALER+IGGHGAEYGAEALERMFASFPTTK+KVADALANAAGHLDDLPGALSALSDLHAHK+LLSHCLLVTLASHHPADFTPAVHASLDK+LRVDPVNFK+MFASFPTTK+MFASFPTTKTYFPHFDVSHGSAQVK+TYFPHFDVSHGSAQVK+VADALANAAGHLDDLPGALSALSDLHAHK+VDPVNFK+VDPVNFKLLSHCLLVTLASHHPADFTPAVHASLDK
IPI00469114	Hba-a2	HBA1	hemoglobin subunit alpha.	1	FLASVSTVLTSK+IGGHGAEYGAEALER+IGGHGAEYGAEALERMFASFPTTK+LLSHCLLVTLASHHPADFTPAVHASLDK+LRVDPVNFK+MFASFPTTK+MFASFPTTKTYFPHFDVSHGSAQVK+TYFPHFDVSHGSAQVK+VADALASAAGHLDDLPGALSALSDLHAHK+VDPVNFK+VDPVNFKLLSHCLLVTLASHHPADFTPAVHASLDK
IPI00828873	Hbb	HBB	beta-2-globin (fragment).	1	DFTPAAQAAFQK+DFTPAAQAAFQKVVAGVATALAHKYH+GTFASLSELHCDK+GTFASLSELHCDKLHVDPENFR+KVITAFNEGLK+LHVDPENFR+LLGNAIVIVLGHHLGK+LLGNAIVIVLGHHLGKDFTPAAQAAFQK+LLVVYPWTQR+LLVVYPWTQRYFDSFGDLSSASAIMGNPK+SAVSCLWAK+SAVSCLWAKVNPDEVGGEALGR+VHLTDAEK+VITAFNEGLK+VNPDEVGGEALGR+VVAGVATALAHK+VVAGVATALAHKYH+YFDSFGDLSSASAIMGNPK+YFDSFGDLSSASAIMGNPKVK	30.0511	63.1881	20.9054		26.4888	6.8112	0.839499	2.84203
IPI00553333	Hbb-b1		hemoglobin subunit beta-1.	1	AAVSCLWGK+DFTPAAQAAFQK+DFTPAAQAAFQKVVAGVATALAHKYH+GTFASLSELHCDK+GTFASLSELHCDKLHVDPENFR+KVITAFNDGLNHLDSLK+LHVDPENFR+LHVDPENFRLLGNMIVIVLGHHLGK+LLGNMIVIVLGHHLGK+LLGNMIVIVLGHHLGKDFTPAAQAAFQK+LLVVYPWTQR+LLVVYPWTQRYFDSFGDLSSASAIMGNAK+VITAFNDGLNHLDSLK+VNSDEVGGEALGR+VNSDEVGGEALGRLLVVYPWTQR+VVAGVATALAHK+VVAGVATALAHKYH+YFDSFGDLSSASAIMGNAK+YFDSFGDLSSASAIMGNAKVK
IPI00755359	Hbb-b1		similar to hemoglobin, beta adult major chain.	1	DFTPAAQAAFQK+DFTPAAQAAFQKVVAGVAAALAHKYH+MIVIVLGHHLGK+MIVIVLGHHLGKDFTPAAQAAFQK+VVAGVAAALAHK+VVAGVAAALAHKYH
IPI00828315	Hbb-b1		beta-2-globin (fragment).	1	DFTPAAQAAFQK+DFTPAAQAAFQKVVAGVATALAHKYH+GTFASLSELHCDK+GTFASLSELHCDKLHVDPENFR+KVITAFNEGLK+LHVDPENFR+LLGNAIVIVLGHHLGK+LLGNAIVIVLGHHLGKDFTPAAQAAFQK+LLVVYPWTQR+LLVVYPWTQRYFDSFGDLSSASAIMGNPK+SAVSCLWAK+VHLTDAEK+VITAFNEGLK+VNPDAIGGEALGR+VVAGVATALAHK+VVAGVATALAHKYH+YFDSFGDLSSASAIMGNPK+YFDSFGDLSSASAIMGNPKVK
IPI00115893	Hbb-bh0		hemoglobin subunit beta-h0.	0.95	LLIVYPWTQR
IPI00330833	Hc	C5	complement c5 precursor.	1	AVDICPTMK+DGHVILQLNSIPSR+DSLEQAVGGVPVTLMAQTVDVNQETSDLETK+DSLEQAVGGVPVTLMAQTVDVNQETSDLETKR+EESPVSHVYLEVVSK+EESTSGSSHAVMDISLPTGIGANEEDLR+ELSYNSLEDLNNK+ENSQYLPIK+ETVLTFIDPEGSEVDIVEENDYTGIISFPDFK+EVFLEMNIPYSVVR+FQNAALLTLQPNQVPR+FSVSIELER+GASASTWLTAFALR+GLLVGEFLSTVLSK+GTVYNYMTSGTK+IDTQDIEASSHFR+IFELFQVGFLNPATFTVYEYHRPDK+ITSATEENVFVK+KAVDICPTMK+LFSSTYQNINIPVTQNMVPSAR+LQGTLPAEAQEK+LVDGVAQISFDSETAVK+MSAV…
IPI00271166	Hdh	HD	huntingtin.	0.99	AMAALGLMLTCMYTGK+ASDPSPATPDSESVIVAMER+EPGEQASTPMSPK+EPGEQASTPMSPKK+IIQLCDGIMASGR+NMVQAEQER+QSDTSGPVTASK+RTAAGSAVSICQHSRR+SGSIVELLAGGGSSCSPVLSRK+VLLGEEEALEDDSESR+VRHVAATSLTR
IPI00652600	Hectd1	HECTD1	similar to hect domain containing 1.	1	DLYDDHFKAVESMPRGVVVTLR+EAASQRPLSSSASNR+EVELPLTNFR+FILDGKLATMYSSGSPEGGSDSSESR+KASLALIR+LATMYSSGSPEGGSDSSESR+LCVSGPLFPSPGLTGLGLLASELR+LSVSSLLAAGAPMSSSASVPNLSSR+MAAAGGTVSGPSSACKPGR+RLCVSGPLFPSPGLTGLGLLASELR+VDATDASYPSVNTCVHYLK						2.14336
IPI00228942	Hectd2	HECTD2	probable e3 ubiquitin-protein ligase hectd2.	0.89	DLSPGAPPAVAAAAPEER+DLSPGAPPAVAAAAPEERK+EAAENRSSPTHLALPNIR+LIIGISNSEGFGLE+LPPIVTAGAAAGLDRGSK+NETSTNWLPVAHTCFNQLCLPPYK+THLVSDSLDELTR							3.47837
IPI00309574	Herc2	HERC2	isoform 2 of probable e3 ubiquitin-protein ligase herc2.	0.99	AEEEDLAAVPFLASDNEEEEDDK+CHSSQPGMLLDSWSR+DDGVDAQSGTK+ECMAVATLNLLR+ETAPVQLPVSGPELAAMMK+GNYGRLGHGSSEDEAIPMLVAGLK+KPTLVQGLEGQK+LGHGDTVPLEEPK+LGHGSSEDEAIPMLVAGLK+LGIGGTESVSTPTLLESIQHVFIKK+MLVESGTTDKPAPPDR+MPSESFCLAAQSRLDSKWLK+NASLMQEAGAIPLLGGLLEHLDR+QCHLTTPITFPPEHPVEEVGR+QFEYEDPIVRGGK+QLAGMSLTIADLSEVDK+QQALSHILTALQIMYAR+QVSEGMDGTADWPPPQEK+RLLTTEFGQSININR+TYEEVCEGDVGK+VAVALDKR+YYANVIGPIQCEGLASLGVMQVACA…						1.76224
IPI00453903	Herc4	HERC4	isoform 1 of probable e3 ubiquitin-protein ligase herc4.	0.85	ENIVGDAMEVLRKTK+QHTSAFVPSSGR+RENIVGDAMEVLRK+SLSDIQIVQVACGYYHSLALSKASEVFCWGQNK+VFELMGSIVTQVACGR				3.67117		2.85781
IPI00227857	Hgfac	HGFAC	hepatocyte growth factor activator precursor.	1	CFDETRYEYFEVGDHWAR+CQIAGWGHMDENVSSYSNSLLEALVPLVADHK+CSSPEVYGADISPNMLCAGYFDCK+DNALSWEYCR+LNKPGVYTR+NGVAYLYGIISWGDGCGR+SDACQGDSGGPLVCEK+SQFVQPICLPEAGSSFPTGHK+VANYVDWINDR+VHSQTPEILAALPESAPAVRPTCGK+VHSQTPEILAALPESAPAVRPTCGKR+VSEGHVEQCGCMEGQAR+YEYFEVGDHWAR+YPPPSSSSPPGGQVLTESGQPCR+YVPYTLYSVFNPNNHDLVLIR	17.1395				15.8507	8.57344
IPI00108189	Hint1	HINT1	histidine triad nucleotide-binding protein 1.	1	HISQISVADDDDESLLGHLMIVGK+MVVNEGADGGQSVYHIHLHVLGGR	1.30657		1.412		2.23715		1.40585		YES
IPI00223713	Hist1h1c	HIST1H1C	histone h1.2.	0.96	ALAAAGYDVEK	26.8232	17.9604	1.99211		3.25373		25.7837	3.87571	YES
IPI00283611	Hk1	HK1	isoform hk1-sa of hexokinase-1.	0.93	ATDCVGHDVATLLR+MGWGAPLLSR+QSGSENPASEDRRPLEK+QTSLDCGILITWTKGFKATDCVGHDVATLLR	1.27296	1.12252		8.53796		1.15335	2.64504	2.56309
IPI00314755	Hn1	HN1	hematological and neurological expressed 1 protein.	0.97	MASNIFGTPEENPPSWAK+MTTTTTFKGVDPNSR	0.534185				1.30149		0.695675
IPI00405058	Hnrpa2b1	HNRPA2B1	isoform 3 of heterogeneous nuclear ribonucleoproteins a2/b1.	0.94	LFIGGLSFETTEESLR+NMGGPYGGGNYGPGGSGGSGGYGGR	2.24752	0.520182	1.10502	0.239235	1.53856	1.56904	0.350789	0.753627
IPI00132443	Hnrpm	HNRPM	isoform 1 of heterogeneous nuclear ribonucleoprotein m.	1	AIEMERGNFGGSFAGSFGGAGGHAPGVARK+FGSGMNMGR+GNFGGSFAGSFGGAGGHAPGVARK+IGGMEGPFGGGMENMGR+MGLAMGGAGGASFDR+MVPTGMGASLER+QGGGGAGGSVPGIER+QGGGGAGGSVPGIERMGPGIDR	0.213023					0.0617241	0.0773603	0.0316604
IPI00315401	Hoxb3	HOXB3	homeobox protein hox-b3.	0.97	LKNSSPGTAEGCGGGGGGGGGGGGGGGGSSGGGGGGGGGGDK+NSSPGTAEGCGGGGGGGGGGGGGGGGSSGGGGGGGGGGDK+QTSKLKNSSPGTAEGCGGGGGGGGGGGGGGGGSSGGGGGGGGGGDK
IPI00310548	Hoxc6	HOXC6	isoform prii of homeobox protein hox-c6.	0.98	ESNLTSTLSGGGGGATADSLGGK+ESNLTSTLSGGGGGATADSLGGKEEK+KESNLTSTLSGGGGGATADSLGGK
IPI00409148	Hp	HP	haptoglobin precursor.	1	AEGDGVYTLNDEK+AEGDGVYTLNDEKQWVNTVAGEK+AEGDGVYTLNDEKQWVNTVAGEKLPECEAVCGKPK+ATDLKDWVQETMAK+ATDLKDWVQETMAKN+DITPTLTLYVGK+DITPTLTLYVGKNQLVEIEK+DWVQETMAK+DWVQETMAKN+GSFPWQAK+HGLTTGATLISDQWLLTTAK+HPVDQVQR+IIGGSMDAK+LPECEAVCGKPK+LPECEAVCGKPKHPVDQVQR+LRAEGDGVYTLNDEK+LRAEGDGVYTLNDEKQWVNTVAGEK+NLFLNHSETASAKDITPTLTLYVGKNQLVEIEK+NLTSPVGVQPILNEHTFCAGLTK+NQLVEIEK+QWVNTVAGEK+QWVNTVAGEKLPECEAVCGKPK+SCAVAEYGVYVR+…							0.23914	0.171913
IPI00128484	Hpxn	HPX	hemopexin precursor.	1	CSPDPGLTALLSDHR+DGWHSWPIAHHWPQGPSTVDAAFSWDDK+DYFVSCPGR+EDKVWVYPPEK+EDKVWVYPPEKK+ELGSPPGISLETIDAAFSCPGSSR+FNPVTGEVPPR+FNPVTGEVPPRYPLDAR+GATYAFTGSHYWR+GECQSEGVLFFQGNR+GECQSEGVLFFQGNRK+GGNNLVSGYPK+GPDSVFLIK+GPDSVFLIKEDK+KWFWDFATR+LEKELGSPPGISLETIDAAFSCPGSSR+LFQEEFPGIPYPPDAAVECHR+LWWLDLK+NPITSVDAAFR+NPITSVDAAFRGPDSVFLIK+NPITSVDAAFRGPDSVFLIKEDK+RLEKELGSPPGISLETIDAAFSCPGSSR+RLWWLDLK+SGAQATWTEVSWPHEK+SG…
IPI00469542	Hrc	HRC	histidine rich calcium binding protein.	0.91	EPVQGEIAHQPLQPTGPSSR+EVGEENVSEEVFR+QGYEEEEDDDDDDGDDDSTEHVHQAHR
IPI00322304	Hrg	HRG	histidine-rich glycoprotein hrg.	1	ALLSYSIETSDLETPDSIDINCEVFNIEDHK+AQDDCLPSR+DSPVLLDFFEDSELYR+DSPVLLDFFEDSELYRK+DTSDMKPHWGHERPLCDK+FESEFPQISK+FFGYTPPK+GLFPFHHQQIGYVYR+GYGPPHGHSR+LGCPPPPEGK+LPPLNIGEVLTLPEANFPSFSLPNCNR+LQEGALPQLPPGYPPHSGANR+NTKDSPVLLDFFEDSELYR+NTKDSPVLLDFFEDSELYRK+RSGYVFELLR+SCPGKFESEFPQISK+SCPGKFESEFPQISKFFGYTPPK+SGYVFELLR+SLQPEIQPFPQTASR+SPLVFGFCR+TDKLGCPPPPEGK+TDNGDFASFR+TNYYVEFSMR+VLDLINK+VSDAHLDR+WQSEIVIGQCK+YK…						3.52448	1.15946	3.68833
IPI00330804	Hsp90aa1	HSP90AA1	heat shock protein hsp 90-alpha.	0.94	QDRTLTIVDTGIGMTK+SLTNDWEEHLAVK	1.00528	1.49873	1.41985	1.97166	0.463369	1.03562	2.0454	1.1154	YES
IPI00331556	Hspa4	HSPA4	heat shock 70 kda protein 4.	1	AGGIETIANEYSDR+ELSTTLNADEAVTR+ELTSICSPIISKPKPK+KPVVDCVVSVPSFYTDAER+TDQPPQAKK	0.428241	0.171925	0.830733	0.365432	0.350845	0.274117	1.11048
IPI00319992	Hspa5	HSPA5	78 kda glucose-regulated protein precursor.	1	AKFEELNMDLFR+ELEEIVQPIISK+FEELNMDLFR+IEIESFFEGEDFSETLTR+IEWLESHQDADIEDFK+IINEPTAAAIAYGLDK+IINEPTAAAIAYGLDKR+ITPSYVAFTPEGER+KSDIDEIVLVGGSTR+LYGSGGPPPTGEEDTSEKDEL+NELESYAYSLK+NQLTSNPENTVFDAK+SQIFSTASDNQPTVTIK+TFAPEEISAMVLTK+TKPYIQVDIGGGQTK+TWNDPSVQQDIK+VEIIANDQGNR+VTHAVVTVPAYFNDAQR	1.01091	1.44321	1.18375	0.685564		0.769233	0.461154	0.6261	YES
IPI00515360	Hspg2	HSPG2	similar to basement membrane-specific heparan sulfate proteoglycancore protein precursor.	1	AVGSLLLGLLLHAR+CAPGYYGNPSQGQPCHR+DPSPGQPSNFIVPFQEQAWQRPDGQPATR+EHLLMALADLDELLVR+EVEQCTCPPGYR+GGSLPAGHQVHGHMLR+GPSCQDCDTGYTR+GSIQVDGEDLVTGR+GSLGTSGETCR+HQGSELHFPSVQPSDAGVYICTCR+LSFSNFAHLGQESFYWQLPEIYQGDK+MFGLMNSHAMLKIASVKPSDAGTYVCQAQNALGTAQK+QLISTHFAPGDFQGFALVNPQR+QPLVVLQGNNIVLEHHASR+SGPVEDFVSLAMVGGHLEFR+SLPEVPETIEFEVR+TSTADGLLLWQGVVR+VSGISMDVAVPENTGQDSAR	13.4116		652.9	623.382		6.04896	20.2525	16.6067
IPI00319167	Hydin	HYDIN	isoform 1 of hydrocephalus-inducing protein.	1	AEGYTMNAEVK+CDPQGANLPVGNK+CEEFLAIDISDRDPR+DQLGVFSLK+EPGKKGSTSSSR+EVVNFNCQVR+FYFGPLLCGKSR+GKGTEMKLLVLDPANR+ILIMNTGDVGAR+LQQLTASVPLCEQRK+MQSTDSHSVEEVGEVESNPVSKAIARHLGIDISAEGR+NILCFIQGGNPLCLTLSGTCVGPPVVK+QSVSASIK+RLEESMGAMHR+TANAISMAK+VITLEPFHTITMKPK+VYGGPTIHLCLQATVIIPSMTLSCNK+YEHFLEQAKKNVEK
IPI00123342	Hyou1	HYOU1	activated spleen cdna, riken full-length enriched library,clone:f830010a06 product:hypoxia up-regulated 1, full insert sequence.	1	FLGDSAAGMAIK+FPEHELIVDPQR+GVGFDRTLGGLEMELR+LIPEMDQVFTEVEMTTLEK+LPATEKPVLLSKDIEAKMMALDR+NINADEAAAMGAVYQAAALSKAFK+QADNPHVALYR	1.07472		0.750607	0.103973		0.085963	0.260337	0.120339	YES
IPI00122973	Icam1	ICAM1	isoform 1 of intercellular adhesion molecule 1 precursor.	1	CHVDGGAPR+CQAWGNPSPK+CQAWGNPSPKMTCR+CVLELADQILETQR+EAFLPQGGSVQVNCSSSCK+EDLSLGLETQWLKDELESGPNWK+EITFTVLASRGDHGANFSCR+LDTPDLLEVGTQQK+LFCSLEGLFPASEAR+SFFCSAALEVAGK+TQLSAVLLR	4.2279	12.3069	1.63753	3.8236		1.71469	10.2613	0.387571
IPI00227797	Icosl	ICOSLG	isoform 2 of icos ligand precursor.	1	CPCFVSLGTR+LGLYDVISTLR+NVTPQDTQEFTCR+SPGINVDSSYK+YLMSPCLK
IPI00113659	Ifi30	IFI30	interferon gamma inducible protein 30.	1	DLFPTWLMVMEIMNITLVPYGNAQER+EAAFLTIVCMEEMDDMEK+KLGPCLQVYAPEVSPESIMECATGK+LGPCLQVYAPEVSPESIMECATGK+LGPCLQVYAPEVSPESIMECATGKR+LNMVEACLLDK+VSLYYESLCGACR	2.13674		15.929				0.266183
IPI00312295	Ifnar2	IFNAR2	isoform ifnar2a of interferon-alpha/beta receptor beta chainprecursor.	1	CIVLQPGQESGMAR+EQIGDSVR+LILSWELENK+WLEGMESYVVAIVIVHR
IPI00115658	Igf1	IGF1	isoform igf-ia of insulin-like growth factor i precursor.	1	APQTGIVDECCFR+GFYFNKPTGYGSSIR+LEMYCAPLKPTK+RAPQTGIVDECCFR+RLEMYCAPLKPTK	7.4558
IPI00138397	Igf2	IGF2	insulin-like growth factor ii precursor.	1	GIVEECCFR+SCDLALLETYCATPAK							10.4135
IPI00556721	Igfals	IGFALS	insulin-like growth factor-binding protein complex acid labile chainprecursor.	1	AFWLDLSHNR+ANVFIHLPR+DFALQNPGVVPR+DISETLFVHC+DLHFLEELQLGHNR+HTPSLASLSLGNNLLGR+LEEGLFR+LETPAEGLFSSLGR+LHTFAGLSGLR+LTYLQPALLCGLGELR+LWLDANPWDCSCPLK+NLITAVAPR+SLAAGLFR+SLPEHVFQGLGR+TFEGLGQLEVLTLNDNQIHEVK+VAGLLEDTFPGLLGLHVLR+WLDLSHNR						61.5876
IPI00387338	Igfbp2	IGFBP2	insulin-like growth factor binding protein 2.	1	CYPNPGSELPLK+EPGCGCCSVCAR+GDPECHLFYNEQQETGGAHAQSVQ+GECWCVNPNTGKPIQGAPTIR+GPLEHLYSLHIPNCDK+LAACGPPPDAPCAELVR+QEGEACGVYIPR+TPCQQELDQVLER	165.123		45.787		15.8507		20.2135
IPI00112485	Igfbp3	IGFBP3	insulin-like growth factor binding protein 3.	1	ALSQCAPPPTAPACTELVR+ALSQCAPPPTAPACTELVREPGCGCCLTCALR+DDVHCLSVQSQ+EMEDTLNHLK+EPGCGCCLTCALR+ETEYGPCR+FLNVLSPR+GFCWCVDK+GFCWCVDKYGQPLPGYDTK+GKDDVHCLSVQSQ+RGFCWCVDK+VDYESQSTDTQNFSSESK+VDYESQSTDTQNFSSESKR+YGQPLPGYDTK+YKVDYESQSTDTQNFSSESK+YKVDYESQSTDTQNFSSESKR	120.432		15.929		30.7015		5.0996	0.964488
IPI00112487	Igfbp4	IGFBP4	insulin-like growth factor-binding protein 4 precursor.	1	CRPPVGCEELVR+EEPRPVPQGSCQSELHR+EPGCGCCATCALGLGMPCGVYTPR+EPGCGCCATCALGLGMPCGVYTPRCGSGMRCYPPR+GELDCHQLADSFQE+LPGGLEPK+THEDLFIIPIPNCDR	136.572		30.858		30.7015		3.17405
IPI00114022	Igfbp5	IGFBP5	insulin-like growth factor-binding protein 5 precursor.	1	ALSMCPPSPLGCELVK+AVYLPNCDR+EHEEPTTSEMAEETYSPK+EPGCGCCMTCALAEGQSCGVYTER+GICWCVDK+HMEASLQEFK+LPGMEYVDGDFQCHAFDSSNVE+QDEEKPLHALLHGR+VIPAPEMR			80.6214				5.20675
IPI00112507	Igfbp6	IGFBP6	insulin-like growth factor-binding protein 6 precursor.	1	GGCVEEEDAGSPADGCTEAGGCLR+GLYVPNCDLR+GPCWCVDPMGQPLPVSPDGQGSTQCSAR+HLDSVLQQLQTEVFR+RGPCWCVDPMGQPLPVSPDGQGSTQCSAR	20.3674		80.6214		82.6791		3.47837
IPI00322513	Igfbp7	IGFBP7	igfbp7 protein (fragment).	1	EDAGEYECHASNSQGQASAAAK+VFLSCEVIGIPTPVLIWNK	33.279		80.6214		90.1045		8.43512
IPI00468055	Igh-6	IGHM	igh-6 protein.	1	DGFSGPAPR+DLHVPIPAVAEMNPNVNVFVPPR+EFVCTVTHR+ESATVTCLVK+FISKPNEVHK+GFSPADISVQWLQR+GQLLPQEK+GVASVCVEDWNNR+HPPAVYLLPPAR+LICEATNFTPKPITVSWLK+LVESGFTTDPVTIENK+QSGAELVRPGASVK+SILEGSDEYLVCK+STGKPTLYNVSLIMSDTGGTCY+YLATSQVLLSPK
IPI00136925	Igj	IGJ	immunoglobulin j chain precursor.	1	CYTTMVPLR+IIPSTEDPNEDIVER+IVVPLNNR+MVQAALTPDSCYPD+NFVYHLSDVCK+NFVYHLSDVCKK+RNFVYHLSDVCK							1.73919
IPI00406213	Igk-C	IGKC	kappa light chain c_region (fragment).	1	ADAAPTVSIFPPSSEQLTSGGASVVCFLNNFYPK+DSTYSMSSTLTLTK+DSTYSMSSTLTLTKDEYER+ELVMTQSPLSLSVSLGDQASISCR+FSGSGSGTDFTLK+QNGVLNSWTDQDSK+QNGVLNSWTDQDSKDSTYSMSSTLTLTK+RADAAPTVSIFPPSSEQLTSGGASVVCFLNNFYPK
IPI00756700	Igl-V1		similar to ig lambda-2 chain c region isoform 2.	1	ANGTPITQGVDTSNPTK+ATLVCLISNFSPSGVTVAWK+FMASSFLHLTSDQWR+FSGSLIGDK+SHNSFTCQVTHEGDTVEK
IPI00230324	Ihh	IHH	indian hedgehog.	1	HGTLVVEDVVASCFAAVADHHLAQLAFWPLR+LLLEESTFHPLGMSGAGS+TGGCFPAGAQVR+VLAMGEDGTPTFSDVLIFLDREPNR
IPI00227163	Il18bp	IL18BP	isoform 2 of interleukin-18-binding protein precursor.	1	ALVLEELSPTLR+DPCSSWSPAVPTK+QYPALDVIWPEK
IPI00113879	Il1rap	IL1RAP	isoform 2 of interleukin-1 receptor accessory protein precursor.	1	CDDWGLDTMR+CPLFEHFLK+DALPPQIYSPNDR+DLEEPINFR+DSCFNSAMR+ITCPNVDGYFPSSVKPSVTWYK+KPDDVTVDITINESVSYSSTEDETR+MYIEHGIHK+QDRDLEEPINFR+QDRDLEEPINFRLPENR+QIQVFEDEPAR+TQILSIK+VAFPLEVVQK+VVYEKEPGEELVIPCK+VYFSFIMDSHNEVWWTIDGK
IPI00119612	Il2rg	IL2RG	cytokine receptor common gamma chain precursor.	1	CLQYLVQYR+FSLPSVDELKR+LNLQNLVIPR+SWTELIVNHEPR+VLMSSANEDIK+YNPICGSSQQWSK
IPI00469067	Ints1	INTS1	isoform 1 of integrator complex subunit 1.	1	DFEVVQTALR+ILHMEAVM+SIQNNPSIAADFLPTFMYCLGSR+YVGCSAPAAVAFLQKHAEPLHDLSFDNSDLVMLK	7.4558								YES
IPI00467447	Iqgap1	IQGAP1	ras gtpase-activating-like protein iqgap1.	1	EEIQSSISGVTAAYNR+EQLSDMMMINK+FLSAIVSSVDK+IGGILANELSVDEAALHAAVIAINEAIDR+KLTELGTVDPK+LAAGDNNSK+LAAVAAINAAIQK+LTELGTVDPK+MLQHAASNKMFLGDNAHLSIINEYLSQSYQKFR+NMPRCIYCIHALSLYLFKLGLAPQIQDLYGK+SWVNQMESQTGEASK+TLQALQIPAAKLEGVLAEVAQHYQDTLIR+WMEACLGEDLPPTTELEEGLRNGVYLAK	1.00845	0.715571	0.799266	0.756313	0.5094	0.616462	1.88656	2.78366
IPI00555085	Isg15	ISG15	ubiquitin cross-reactive protein precursor.	0.89	GHSNIYEVFLTQTVDTLK+KQIAQKIGVPAFQQR				0.253694			1.40585
IPI00380162	Itch	ITCH	isoform 1 of e3 ubiquitin-protein ligase itchy.	0.88	ENNIEECGLEMYFSVDK+MSDSGPQLDSMGSLTMK+SALDNGPQIAYVR
IPI00320605	Itgb2	ITGB2	integrin beta-2 precursor.	0.99	LGGDLLQALNEITESGR							1.7911	6.47941
IPI00322867	Itih1	ITIH1	itih1 protein.	1	AAVLGESAGLVR+AQGSHPELSSPASILIMLTDGEPTEGETDR+ATCLVDEEEMK+ATCLVDEEEMKK+DKLCDLLVANNYFTHFFAPK+EVAFDVEIPK+FAHYVITSQVVNNADK+GHVLENHVER+GLLGQFFSPLDFEVFDLHPGSDPTK+GLTDEDGLEPTIDKPLEDSQPLEMVGPR+GSAVHQDFLGFYVLDSFR+GSLVPVSNANLQAAQDFVR+HKQYYDGSEIVVAGR+ILEDMRPVDNFDLVLFGSK+LCDLLVANNYFTHFFAPK+LDAQASFLSEELAAQTIK+LDAQASFLSEELAAQTIKK+LMQYDITIK+LTYEEVLK+LWAYLTIQELLAK+MSLDYHFVTPLTSLTIR+QLVQHFEIDVDIFEPQGISK+QYYDGSEIVV…	4.2279			19.6982		48.9651	3.17405	2.50057
IPI00227834	Itih2	ITIH2	inter-alpha-trypsin inhibitor heavy chain h2 precursor.	1	AGELEVFNGYFVHFFAPENLDPIPK+FLHVPDTFEGHFQGVPVISK+FYNQVSTPLLR+GFIDGHYK+HLEVNVWIIEPQGMR+ILSLVSDPESGIVVNGQLIGAK+IQPSGGTNINEALLR+IYGNQDTSSQLK+KLWAYLTINQLLAER+LVNNSPLPQSVVFDVQIPK+LWAYLTINQLLAER+MLADSPPQDHSCCSGALYYGTK+NICFNIDSEPGK+NILFVIDVSGSMWGIK+NVQFNYPQASVTDVTQNNFHNYFGGSEIVVAGK+SLPEESGEETDTVDPVTLYSYK+TDDQFSVVDFNHNVR+TILDDLR+TILDDLRTDDQFSVVDFNHNVR+TLDMENFNTEVNIPPGAK+VQFELHYQEVK	49.4185	108.416	45.287	5.84234	67.8284	79.2589	1.68702		YES
IPI00124725	Itih3	ITIH3	inter-alpha-trypsin inhibitor heavy chain h3 precursor.	1	ADTAKEVSFDVELPK+DHLVQATPANLK+EAKTFVK+EQGYIFGDYIER+ESPGNVQIVNGYFVHFFAPQGLPVVPK+EVSFDVELPK+FAHNVVTTR+FPLYNLGFGNNLNYNFLETLALENHGLAR+FTVSVNVAAGSK+GDEKENITAEALDLSLK+GHGALNDLTFTEEVDMEEMDAALK+ILDDVKEDDYLNFILFSTDVTTWK+KDASVGTKVICWFVHNNGEGLIDGVHTDYIVPSLF+KNMVVSFGDGISFVIILHQVWKK+LWAYLTIEQLLEK+LWAYLTIEQLLEKR+MSAQTHGLLGQFFQPFDFK+NIHDQSMTNINDGLLK+NIVFVIDVSGSMSGRK+NSYPHFYDGSEIVVAGR+SCPTCTDSLLNGDFTIVYDVNR+SLPEG…									YES
IPI00119818	Itih4	ITIH4	adult male liver cdna, riken full-length enriched library,clone:1300004a21 product:inter alpha-trypsin inhibitor, heavy chain 4,full insert sequence.	1	ADAVQEATFQVELPR+AHGGTNINNAVLLAVELLDR+AHGGTNINNAVLLAVELLDRSNQAELLPSK+DIVWEPPVEPDNTK+DIVWEPPVEPDNTKR+DLSPQDQFNLIEFSGEANQWK+FEVSVNVAPGSK+GELGQFYR+GLMLLLNDTQHFSNNVK+GSEMVVAGK+ILKDLSPQDQFNLIEFSGEANQWK+ISASGAELEALEAQVLNLSLK+ITFELIYQELLQR+ITFELIYQELLQRR+KAFITNFSMIIDGVTYPGVVK+KTLFSVLPGLK+LGMYELLLK+LPLAAQAHPFRPPVR+LQDQGPDVLLAK+LSYQEGFPGAEISCWTVEI+LWALLTIQQQLEQR+MALDNGGLAR+MLSLPSVAQYPADPHLVVTEK+MTMNMMGLLQL…		12.3069				46.4407	0.610394	0.314972	YES
IPI00312711	Itih4	ITIH4	pk-120.	1	ADAVQEATFQVELPR+AHGGTNINNAVLLAVELLDR+AHGGTNINNAVLLAVELLDRSNQAELLPSK+DIVWEPPVEPDNTK+DIVWEPPVEPDNTKR+DLSPQDQFNLIEFSGEANQWK+FEVSVNVAPGSK+GELGQFYR+GLMLLLNDTQHFSNNVK+GSEMVVAGK+ILKDLSPQDQFNLIEFSGEANQWK+ISASGAELEALEAQVLNLSLK+ITFELIYQELLQR+ITFELIYQELLQRR+KAFITNFSMIIDGVTYPGVVK+KTLFSVLPGLK+LFVDPSQGLEVTGK+LGMYELLLK+LPLAAQAHPFRPPVR+LQDQGPDVLLAK+LSYQEGFPGAEISCWTVEI+LWALLTIQQQLEQR+MALDNGGLAR+MLSLPSVAAQYPADPHLV…		12.3069				46.4407	0.610394	0.314972	YES
IPI00130758	Itm2b	ITM2B	integral membrane protein 2b.	1	AWCWCMCFGLAFMLAGVILGGAYLYK+DDVILNEPSADAPAAR+IENVDNLGFFIYR+IFEEDAVEFISVPVPEFADSDPANIVHDFNK+NLLELLINIK+RAWCWCMCFGLAFMLAGVILGGAYLYK
IPI00652888	Itpa	ITPA	2 days neonate thymus thymic cells cdna, riken full-length enrichedlibrary, clone:c920001j06 product:inosine triphosphatase.	1	KLEEVIQILGDNFPCTLEAQK				0.704704	0.702114				YES
IPI00117630	Itpr1	ITPR1	isoform 7 of inositol 1,4,5-trisphosphate receptor type 1.	0.99	CNSLLPLDDIVR+EELLPAEETEQDK+ELQTMLKPGGQVDGDEALEFYAK+ESLTSFGNGPLSPGGPSKPGGGGGGPGSSSTSR+GQGPDEPMDGASGENEHKKTEEGTSKPLK+ILYNMRPKELVEVIKK+MVYSLVSVPEGNDISSIFELDPTTLR+QAEPEKEDIMVMDTKLK+QIGYDVLAEDTITALLHNNRK+RESLTSFGNGPLSPGGPSKPGGGGGGPGSSSTSR+TFLRVLLHLTMHDYPPLVSGALQLLFRHFSQR+VFHESILLAIALLEGGNTTIQHSFFCR						3.52448
IPI00263233	Itpr2	ITPR2	isoform 3 of inositol 1,4,5-trisphosphate receptor type 2.	0.99	AGEGSMLR+CNSLLPLDDIVR+DPTEYTGPESYVAQMITEK+EQNILAQVFGILK+GDESGPLAYHITLVELLAACTEGK+LESTMSLVK+NMGAHSVVLDLLQIPYEK+SGSYENGDVGEGQAK+TPVTGNHGVPTMTLSSMMETCQK
IPI00670418	Jmjd1c	JMJD1C	similar to jumonji domain containing 1c isoform 3.	0.95	EMCDACEATLFNVHWVCR+IILPNVNLESAHVK+KGEVEEDSKPNGVLSR+NQTVAASLPLDSTMTCTASNK+RQPKPTYK+YILDIIGDK+YILDIIGDKFCQLVTSEK
IPI00410901	Kcnma1	KCNMA1	isoform 1 of calcium-activated potassium channel subunit alpha 1.	1	EEVVAAEVGWMTSVK+MANGGGGGGGSSGGGGGGGGGSGLR+YCADPDAEDASNIMRVISIK								2.43785
IPI00122258	Kcnq5	KCNQ5	potassium voltage-gated channel subfamily kqt member 5.	0.85	DLSGSAQNSGCLTR+ESVQFAQSNLTK+HHAGGEEGGAAGLWVRSGAAAAAGAGGGRPGSGMKDVESGR+KPFCVIDTIVLIASIAVVSAK+KSFDMGGETLLSVRPMVPK+SFDMGGETLLSVRPMVPK+SGAAAAAGAGGGRPGSGMK+SGAAAAAGAGGGRPGSGMKDVESGRGR+TQGNIFATSALR
IPI00462934	Khsrp	KHSRP	activated spleen cdna, riken full-length enriched library,clone:f830029a18 product:kh-type splicing regulatory protein, fullinsert sequence.	0.89	GGGGPGGGGPGGGGASGGPSQPPGGGGPGIRK+MSDYNTGGPPPGPPPPAGGGGGAAGAGGGPPPGPPGAGDR+VPDGMVGLIIGR	0.411659	1.48515			0.638284		0.428925	1.03741	YES
IPI00130218	Kif11	KIF11	kinesin-like protein kif11.	0.81	ENRGLNPVEKYK+EQLLDQLQKK+ILQDSLGGR+LCGDLTEDLK+LNLVDLAGSENIGR+MASQPSSLKK+NGVYISEESFR+TTVHSKKILAESDGLLQELR						0.704896
IPI00454081	Kif21a	KIF21A	isoform 1 of kinesin-like protein kif21a.	0.89	DFMETLNTLK+KLQQDVMEMK+LLESEAVNENLRK+LTGHLGPVMCLTVDQISNGQDLIITGSK+MLGAADESSVR+RDHQLRLLEAQK
IPI00420571	Kif26a	KIF26A	similar to cg14535-pa.	1	APTAEKAAFYLDAALAARSTSR+DHLCEELAETQGR+GAACTTALVTPAPGTSAGGSTGPSAAASFFIR+HCHTKLVELK+KAVAPTVVTSCPR+KQVTLYDPAAGPPGCAGLR+LECIDGSEAFPGPQGGSDGAQASPAR+LGVPSASPPLGPAPACR+RDHLCEELAETQGR+SAESTSFLK+SAPGLSGDPDYSSSSEQSCDTVIYVGPGGMALSDR+SLHPGEAVATTQTQPGR+VEKCGQGGMSGGRSR				6.34234	8.42537
IPI00113057	Klkb1	KLKB1	plasma kallikrein precursor.	1	ADTNTIYTNCWVTGWGYTK+ATIPLVPNEECQK+CLLFSFLAVTPPK+CLLFSFLAVTPPKETNK+CLLFSFLAVTPPKETNKR+CQFFIYSLLPQDCK+CQFFIYSLLPQDCKEEGCK+DIYKGLDMRGSNFNISK+EGGTDACKGDSGGPLVCKHSGR+ELIIHQEYK+EQGETQNILQK+ESITGTLPR+FGCFMK+GGDLAAIYTPDAQYCQK+HSASGTPTSIK+IKELIIHQEYK+ITYGMQGSSGYSLR+IYGGILSLSEITK+LCTNNFHCQFFTYATSAFYRPEYR+LSTDGSPTR+LVDSPDCTTK+LVSQTHLCGGSIIGR+MCTFHPR+QCGHQISACHR+QWVLTAAHCFDGIPYPDVWR+SADNLVSGFSLK+SGRPSPPIPQEN…		34.9208		6.34234		66.6365	10.2468	5.12618
IPI00129225	Kng1	KNG1	isoform lmw of kininogen-1 precursor.	1	AGAEPAPER+APILKAYFPCIGCVHAISTDSPDLEPVLK+ATSQVVAGTK+ATSQVVAGTKYVIEFIAR+ATSQVVAGTKYVIEFIARETK+AYFPCIGCVHAISTDSPDLEPVLK+CQALDMTEMAR+CQALDMTEMARRPPGFSPFR+CSKESNTELAEDCEIK+DAEEAATGECTATVGK+DAEEAATGECTATVGKR+DIPVDSPELK+DIPVDSPELKEVLGHSIAQLNAENDHPFYYK+EGNCSAQSGLAWQDCDFK+EGNCSAQSGLAWQDCDFKDAEEAATGECTATVGK+ENEFFIVTQTCK+ENEFFIVTQTCKIAPSK+ENEFFIVTQTCKIAPSKAPILK+ERFPSLHGDCVALPNGDDGECR+ESNTELAEDCEIK+ESNTELAED…	30.0511					6.04896
IPI00656329	Kng1	KNG1	kng1 protein.	1	APILKAYFPCIGCVHAISTDSPDLEPVLK+ATSQVVAGTK+ATSQVVAGTKYVIEFIAR+ATSQVVAGTKYVIEFIARETK+AYFPCIGCVHAISTDSPDLEPVLK+CPGRPWKPASWK+CQALDMTEMAR+CQALDMTEMARRPPGFSPFR+CSKESNTELAEDCEIK+DAEEAATGECTATVGK+DAEEAATGECTATVGKR+DAETEQGPTHGHGWLHEK+DIPVDSPELK+DIPVDSPELKEVLGHSIAQLNAENDHPFYYK+DPNTETTEFSDFDLLDALS+EGNCSAQSGLAWQDCDFK+EGNCSAQSGLAWQDCDFKDAEEAATGECTATVGK+ENEFFIVTQTCK+ENEFFIVTQTCKIAPSK+ENEFFIVTQTCKIAPSKAPILK+EQEE…	30.0511					6.04896
IPI00400202	Kng2		hmw kininogen-ii.	1	ATSQVVAGTNYVIEFIAR+CPGRPWKPASWK+DIPVDSPELK+DSEEAATGECTATMGK+DSEEAATGECTATMGKK+ENKFFIVTQTCK+ESNTELTEDCEIK+EVLGHSIAQLNTENDHPFYFK+FFIVTQTCK+GDCVALPNGDGGECR+GLAWQDCDFK+GLAWQDCDFKDSEEAATGECTATMGK+GPIVTEEYHCASCVHPISADNPDLEPVLK+HLGQSLDCNANVYMRPWENK+IEDFTQSCDLHPGDDLVEALPKPCPGCPR+KATSQVVAGTNYVIEFIAR+LISDFPEATSQK+LQSGNQFVLYR+MDGSATFYSFNYQIK+RPPGFSPFR+RRPPGFSPFR
IPI00463282	Krt2	KRT2	keratin (fragment).	0.83	DYQELMNTK+GGGGGGGSSYGSGGR+GGSGGGYGSGGGSGSGGGYSSGGGSR+GGSGGGYGSGGGSRGGSGGGYGSGGGSGSGGGYSSGGGSR+GGSSSGGGGYSSGGGSR+MSGDFSDNVSVSITSSTISSSMASK+TGFGSGGQSSGGR	9.88503	19.9693	1.0286	13.9234	2.11601	9.95934	1.2292	4.26203
IPI00416302	Krt39	KRT39	krt39 protein.	0.83	ANYEAELSLR+INIEVTAAPSVDLNQILQEMR+MDTKGSTVTISSSTPPQNCSGNTNFRTNSSSNK+MLEGENADLEDK
IPI00169687	Krtcap3	KRTCAP3	isoform 1 of keratinocytes-associated protein 3.	0.94	LHWALLTLALVNLLLSAACSMGLLLAVSLTVANGGR+LHWALLTLALVNLLLSAACSMGLLLAVSLTVANGGRR+MGGGSRAATMR								3.87571
IPI00653195	Krtdap	UNQ467	18-day embryo whole body cdna, riken full-length enriched library,clone:1110003o09 product:hypothetical protein, full insert sequence.	1	LQSAFQSENFLNWHVITDMFK+NAFPFINWDFFPK
IPI00406778	L1cam	L1CAM	l1 cell adhesion molecule.	1	EAAGGNDSSGATSPINPAVALE+EGGTMALFGKPDFGNISATAGENYSVVSWVPRK+ETVKPVEVEEGESVVLPCNPPPSAAPLR+FQLQATTQQGPGEAIVR+LGTAMSHEIQLVAEGAPK+TLQLLNVGEEDDGEYTCLAENSLGSAR	7.4558	51.8811	4.72782	5.40484			53.785	29.976
IPI00756745	Lama2	LAMA2	laminin, alpha 2.	0.94	CAHGYFNFQEGGCIACDCSHLGNNCDPK+CSCSDQTGQCSCK+EVAEDELVAAEGLLK+GSPEDCQPCACPLNIPSNNFSPTCHLDR+HMAAPLIGQLTR+HMQNLTEEQPIEVKKLFVGGAPPEFQPSPLR+IATDVEVCQCPPGYSGSSCETCWPR+IGPVTYSLDGCVR+LIDKLKPIK+LLGEINSVIDYVDDIK+LTKGTGKPLEVNFAK+MDGMGIEMIDEK+NKIIADAGTSVRNLEQEADR+QANISIVDIDSNQEENVATSSSGNNFGLDLK+QEGILYVDDASSQTISPKK+RIGPVTYSLDGCVR			5.97634
IPI00116913	Lama5	LAMA5	laminin subunit alpha-5 precursor.	1	ADPLQPPQALTAASK+AHVEGPSCDRCKPGYWGLSASNPEGCTRCSCDPR+CDVGGALGQGCEPK+CRPNTQGPTCSEPAK+CVCKPNFR+EQLQGINASSAAWAR+FIQRAVEASNAYSSILQAVQAAEDAAGQALRQASR+GDSCQECAPGYYR+GGQLCAGSAPGALGPR+GTLGGVTECQGNGQCFCK+GYAHMMAIQPR+LLINGAPVNVTASVQIQGAVGMR+LNQLAINLSGIILGINQDR+LNTTGISFGCTADLLVGR+LPESLAGSPALLHLGSLPK+RGGQLCAGSAPGALGPR+RVVLEVASEAGRGPPASNVELCMCPANYR+TPTQMVGVTPCVSGPLEDGLFFPGSEGVVTLELPK+WALAEVER	12.4546	0.945283	25.3817	8.51351		1.76224	9.37723	0.442797
IPI00117093	Lamb3	LAMB3	laminin subunit beta-3 precursor.	0.87	AAQQVSDSSSLLSQLRDSR+CRPLSQRPNGHLTGGK+DMPCEEETGR+EAEGLERQAGGGGTGGAQLMALR+EQMSGFWAR+QAGGGGTGGAQLMALR+QGTVALQEAQDTMQGTGR+VQLNLMDLASAIPASQSK+WWQSQNDVSPVSLQLDLDK	3.56123		75.6451		15.8507		1.20502
IPI00400016	Lamc1	LAMC1	laminin subunit gamma-1 precursor.	1	CSCKPGVMGDK+DNTAGPHCEK+EVVCTHCPTGTAGK+KYEQAKNISQDLEK+NTIEETGILAER+QDIAVISDSYFPR+RCELCDDGYFGDPLGSNGPVR	35.7569		60.7161		20.991	17.8714	7.28728	1.1065
IPI00469218	Lamp1	LAMP1	adult male lung cdna, riken full-length enriched library,clone:1200007i01 product:lysosomal membrane glycoprotein 1, fullinsert sequence.	1	EIYTMDSTTDIK+ENVSDPSLTITFGR+LNMTLPDALVPTFSISNHSLK	0.573523	0.511805	0.664038	2.78228		2.21959	1.68702	1.63785
IPI00331436	Lap3	LAP3	isoform 1 of cytosol aminopeptidase.	1	EMLNISGPPLKAGKTR+GSEEPPVFLEIHYMGSPNATEAPLVFVGK+SAGACTAAAFLR+SAGVDDQENWHEGKENIR+SWIEEQEMGSFLSVAK+TIQVDNTDAEGR	0.915157	0.751374	0.312934	0.18121			1.00673	0.17023
IPI00226468	Lbxcor1	LBXCOR1	isoform 1 of ladybird homeobox corepressor 1.	0.99	AGAMPISSR+ALGLAAAASGPAGPGGPGGSAGVR+AVAAAVAAAAAAAAAAAGGGGPESLDGAEPAK+CGEDEAAGPPGPPPPHPQR+EPCGPLGGPGAAK+GGAGGGGGPGCGSEMAPGPPPHK+GGAGGGGGPGCGSEMAPGPPPHKSLR+RAGAMPISSRR+TFSLQGGGGGGANSGSGGAGKGGAGGGGGPGCGSEMAPGPPPHKSLR
IPI00133500	Lcat	LCAT	phosphatidylcholine-sterol acyltransferase precursor.	1	AAPYDWR+DHFIDGFISLGAPWGGSIK+FFTDLHFEEGWHMFLQSR+ILASGDNQGIPILSNIK+LAGYLHTLVQNLVNNGYVR+LDKPDVVNWMCYR+MGLPGSPWQR+QPQSWKDHFIDGFISLGAPWGGSIK+STELCGQWQGR
IPI00115941	Lcn2	LCN2	neutrophil gelatinase-associated lipocalin precursor.	1	AGQFTLGNMHR+SLGLKDDNIIFSVPTDQCIDN+WYVVGLAGNAVQK+YPQVQSYNVQVATTDYNQFAMVFFR	10.7407		70.1687	1.83558			3.12034	0.82004
IPI00118892	Lcp1	LCP1	plastin-2.	1	EAQKSSSIASFK+EGKPYLVLGLLWQVIK+GSVSDEEMMELR+LNLAFIANLFNK+MARGSVSDEEMMELREAFAK+MVMTVFACLMGK+TLTLALVWQLMR+VDTDGNGYISCNELNDLFK+VNDDIIVNWVNTTLK	1.27296	1.12252					0.266183	0.90113	YES
IPI00312063	Ldlr	LDLR	low-density lipoprotein receptor precursor.	1	AIVVDPVHGFMYWTDWGTPAK+ECKTNECLDNNGGCSHICKDLK+IGSECLCPSGFR+LTGSDVNLVAENLLSPEDIVLFHK+NVVALDTEVTNNR+TNECLDNNGGCSHICKDLK+VYWTDVINEAIFSANR	17.1395		5.97634			1.20979
IPI00130168	Lect1	LECT1	chondromodulin-1 precursor.	0.83	ARIPEVGTVTK+VVMPCSWWVAR
IPI00135062	Lect2	LECT2	isoform 1 of leukocyte cell-derived chemotaxin 2 precursor.	1	HHPGVDVLCSDGSVVYAPFTGK+IYPGIQSHVHVENCDSSDPTAYL+LGTLLPLQK+TCDSYGCGQYSAQR
IPI00109205	Lepre1	LEPRE1	isoform 1 of prolyl 3-hydroxylase 1 precursor.	0.8	AVGFSSGTENPHGVKAVTRGQR+LLAAMLAVAAAAALR+SLCQTEGRCTR+TAIEESQAER						0.857344
IPI00229517	Lgals1	LGALS1	galectin-1.	1	FNAHGDANTIVCNTK+LNMEAINYMAADGDFK+MACGLVASNLNLKPGECLK	0.986673	2.01338	0.683855	0.188515	1.17927	1.23093	0.828975	0.0871076
IPI00130627	Lgmn	LGMN	legumain precursor.	0.92	DYTGEDVTPENFLAVLR+IEMAMDK	0.993686		12.2755	1.2983	8.42537		15.8702		YES
IPI00119299	Lifr	LIFR	isoform 1 of leukemia inhibitory factor receptor precursor.	1	DRFHSCHPLETTNVK+DTVQHWNWTSDLPLQCATHSVSIR+EIICSWNPGR+EWSDWSPLK+FHSCHPLETTNVK+GAEDSTYHVAVDK+GAEDSTYHVAVDKLNPYTAYTFR+GYLFYFQK+HDPNMTCDYVIK+HLTTEATPSKGPDTWR+IASMEIPNDDITVEQAVGLGNR+IFLTWR+INLLCQIEICK+IPALSPGDHEVTINYLNGFQSK+ITGLVGPR+LNPYTAYTFR+LSCETHDLKEIICSWNPGR+NDYIISVVAR+NLIVYWKPLPINEANGK+NTETNVFPQDK+NTEYTLFESISGK+SEPCLLDWR+TEPVALVLLNTMLSGK+TLEMNPCTPNNVEVLESR+VWDCTWPAPLGVSPGTVK+WHIDSPHFSGYK+YNFYLYGC…									YES
IPI00407541	Lifr	LIFR	isoform 2 of leukemia inhibitory factor receptor precursor.	1	DRFHSCHPLETTNVK+DTVQHWNWTSDLPLQCATHSVSIR+EIICSWNPGR+EWSDWSPLK+FHSCHPLETTNVK+GAEDSTYHVAVDK+GAEDSTYHVAVDKLNPYTAYTFR+HDPNMTCDYVIK+HLTTEATPSKGPDTWR+IASMEIPNDDITVEQAVGLGNR+IFLTWR+INLLCQIEICK+IPALSPGDHEVTINYLNGFQSK+ITGLVGPR+LNPYTAYTFR+LSCETHDLKEIICSWNPGR+NDYIISVVAR+NLIVYWKPLPINEANGK+NTETNVFPQDK+NTEYTLFESISGK+SEPCLLDWR+SIIGYVEELEA+TEPVALVLLNTMLSGK+VWDCTWPAPLGVSPGTVK+WHIDSPHFSGYK+YNFYLYGCTNQGYQLLR									YES
IPI00308609	Lman2	LMAN2	9 days embryo whole body cdna, riken full-length enriched library,clone:d030015m14 product:vesicular integral-membrane protein vip36	0.98	DNVDDPTGNFR+NLHGDGIALWYTR	1.44152		1.59566	0.355069	1.05317		1.3164	0.579876	YES
IPI00380136	Loxl1	LOXL1	lysyl oxidase homolog 1 precursor.	0.99	CLASTAYAPEATDYDLR+GAGGGMGAGAAAVASAGVIYPFQPR+MALAGAGSQLR+TYEQGYVYYRGAGGGMGAGAAAVASAGVIYPFQPRAR	10.6837				82.6791		3.47837
IPI00224208	Loxl2	LOXL2	isoform 1 of lysyl oxidase homolog 2 precursor.	0.83	CNIPIMGFQKKVR+FSMNCTGTEAHISSCK+IRPILSAFR			70.6687	17.027	22.7761	135.56
IPI00129250	Lrg1	LRG1	leucine-rich alpha-2-glycoprotein precursor.	1	CAGPEAMK+DMQDGFDISHNPWICDK+DMQDGFDISHNPWICDKNLADLCR+ELHLSSNR+ELHLSSNRLQALSPELLAPVPR+LEDSLLAPQPFLR+LHLEGNR+LLDVAELGSL+LQALSPELLAPVPR+NLADLCR+SLPPGLFSTSANLSTLVLR	17.1395		40.8107				3.47837
IPI00119063	Lrp1	LRP1	low-density lipoprotein receptor-related protein 1 precursor.	1	ACACAHGMLAEDGASCR+CACPTNFYLGGDGR+CDMDQFQCK+CELDQCWEYCHNGGTCAASPSGMPTCR+CNGQDNCGDGEDER+DNTTCYEFKK+DVIEVAQMK+EDDCENGEDETHCNK+ETLVQDNIQWPTGLAVDYHNER+FCSEAQFECQNHR+GIAIDWVAGNVYWTDSGR+IETAAMDGTLR+INNGGCQDLCLLTHQGHVNCSCR+KLSGCSQDCEDLK+LNGTDPIVAADSKR+LTSCATNASMCGDEAR+MTNGAMNVEIGNPTYK+MYDAQQQQVGTNK+NGDTCVTLLDLELYNPKGIALDPAMGK+QCDGVDNCGDGTDEEDCEPPTAQNPHCK+QPRVRSHACENDQYGKPGGCSDICLLANSHK+QWLCDGSDDCGDGSDEAA…						0.88112	0.524246	1.09669	YES
IPI00119787	Lrp1b	LRP1B	low density lipoprotein-related protein 1b.	0.99	AIVVDPVNGWMYWTDWK+CNGEPDCVDGSDEMDCVIECK+CNLDGGNLEVIESMK+DCPDGSDEGDLCDECSLNNGGCSNHCSVVPGR+DFLCSNGDCVSSR+EAQQGSNSCQVNNGGCSQLCLPTSETTR+ECADLNECLLFGICSHHCLNTR+EKGTNVCAKENGGCQQLCLYR+EPVGLSIDYVENK+ICLQLEKICNGINDCGDNSDEEHCSGK+IFVCNFNGSVCVTLIESELHNPKAIAADPIAGK+LLTNMAGEPYAIAVNPK+NCIPMELQCDSLDDCGDGSDEQGCLK+SARCNQNMDCSDASDEKGCNNTDCTHFYK+TCACAHGYLAGDGVTCLR+TCEIVDYCASHLR
IPI00420706	Lrpprc	LRPPRC	leucine-rich ppr motif-containing protein.	0.87	GDLPAALEASIACHK+ITELLYK+LHSSSLQFTLHCALQANRTALAKAVMEALR+MVAGLDTIGLSK+MVFINNIALAQMK+QVPSQIAVTR+VYSCSMK	0.324165			3.8485		7.74011	3.47837	6.75141
IPI00313672	Lsp1	LSP1	isoform 1 of lymphocyte-specific protein 1.	1	QQFWGNEGTAEGTEPSQSERPEEK+SSELDEDEGFGDWSQKPEPR+TLWETGEVQSQSASK+TPSCQDIVAGDMSK+TPSCQDIVAGDMSKK+VHLEESNLSYR							1.1729	0.129599
IPI00124265	Ltbp4	LTBP4	isoform 2 of latent-transforming growth factor beta-binding protein 4precursor.	1	CDNTAGSFHCACPAGFR+CTDVDECSSGTPCGLHGQCTNTK+CVCGTGFQAGPR+ELRGSECASPLPGLR+FCQLHSSGARPPAPAMPGLTR+LECVDNDECADEEPACEGGR+SVYTMPLANHR+VPEGFTCDCFDGYR	13.9116		175.172		8.42537		1.48919
IPI00323235	Ltf	LTF	lactotransferrin precursor.	1	ADAMTLDGGTMFDAGKPPYK+AGNVAFLK+CASSPEEPYSGYAGALR+CGLVPVLAENQK+CPGEFCLFQSK+DFELLCLDDTR+DNAGDVAFTR+DRFPNLCSSCAGTGANK+DSTVLQNTDGK+ECHLAQVPSHAVVSR+EDAGFTWSSLR+ESAIGFVR+EYVIATER+FNEFFSQSCAPGADPK+GDADAMSLDGGYIYTAGK+GSTVFEELPNK+GSTVFEELPNKAER+IPIGTLRPYLNWNGPPASLEEAVSK+KVGGPPLSCVK+LKDFELLCLDDTR+LKQCSSSPLLEACAFLTQ+LLCPDNTWKPVTEYK+LRPVAAEVYGTK+NCHLAIAPNHAVVSR+NLLFNDNTECLAK+QASGFQLFASPSGQK+QCIQAIVTNR+QCSSSPL…	23.0953	6.15346	20.4054	3.17117	23.2761	16.1469	0.474061	0.514385
IPI00313900	Lum	LUM	lumican precursor.	1	EDAVSASLK+FTGLQYLR+ILGPLSYSK+ISNIPDEYFK+ISNIPDEYFKR+LDGNPLTQSSLPPDMYECLR+LPAGLPTSLLTLYLDNNK+LPAGLPTSLLTLYLDNNKISNIPDEYFK+NNQIDHIDEK+RFTGLQYLR+SIPTVNENLENYYLEVNELEK+SIPTVNENLENYYLEVNELEKFDVK+SLEYLDLSFNQMSK+SLQDLQLTNNK+SVPMVPPGIK
IPI00120592	Ly6a		lymphocyte antigen 6a-2/6e-1 precursor.	0.99	NNLCLPICPPNIESMEILGTK
IPI00113427	Lyz	LYZ	lysozyme c type p precursor.	1	ALLTLGLLLLSVTAQAK+DLSQYIR+LADWVCLAQHESNYNTR+NACGINCSALLQDDITAAIQCAK+STDYGIFQINSR	4.2279					6.04896	2.27012
IPI00107952	Lyzs		osteoclast-like cell cdna, riken full-length enriched library,clone:i420013m05 product:lysozyme, full insert sequence.	1	AVNACGINCSALLQDDITAAIQCAK+DLSQYIR+GDQSTDYGIFQINSR+NGMAGYYGVSLADWVCLAQHESNYNTR+RNGMAGYYGVSLADWVCLAQHESNYNTR
IPI00668611	Macf1	MACF1	similar to microtubule-actin crosslinking factor 1 (actin cross-linking family 7) isoform 21.	1	AECSALGTEVACGQQXGGREKVK+AEPALPTAPAPAAR+DVVQGHLQQVQQEVQVK+EIQEIQDFSGNLGDFIYGQK+EMGGEQSVQMSR+EPDQAEPPGADSSSR+EPXSTQWFLXGDCGXGGGSAAFCAPWRR+ETEILAKEREK+GAAPGAXHSLGHGVXTLCFQAKPAXASLKTGRR+GANTPVSAK+GEGATAAVHAAAGPGFPQXNXR+GHSGYASSRR+GICKPPGLLPGCR+GLLXETESAQXCR+KATVLNR+LEDLCNWVGQAER+LLDENMAR+LSVDNAFKHGLIGEDMAR+MVSHVKQSTSGLDAEEAR+NTQGTTTSSHTSASADIEK+NYRFHIQPLPEPLLXLGXAVCFAAEGNCSVSECSGK+QMGYCLWQVCR+QSMAERK…						1.98931	3.47837	2.43785
IPI00132493	Man1a	MAN1A1	mannosyl-oligosaccharide 1,2-alpha-mannosidase ia.	1	FDGGVEAIATR+FVGGLLSAYYLSGEEIFR+MPVGGLLPLFSSPGGGGLGSGLGGGLGGGR+MYFDAVQAIETHLIR+VNGGYSGLR
IPI00127450	Man2c1	MAN2C1	alpha-mannosidase 2c1.	1	APDATADMGR+DGEPVQGLTKEGEK+HEFTYALMPHK+MAAAPFLK+MCSEFWLPDTFGYSAQLPQIMQGCGIKR+SHGNPLLSAAAAALCAGEPGPK+SLTLYVEVACNGLLGAGK+SLTLYVEVACNGLLGAGKGSMIAAPDPEK
IPI00112335	Map2k4	MAP2K4	dual specificity mitogen-activated protein kinase kinase 4.	0.94	DAGCRPYMAPER+EGDCWICMELMSTSFDK+MAAPSPSGGGGSGGGGGTPGPIGPPASGHPAVSSMQGK
IPI00752757	Mapkbp1	MAPKBP1	jnk-binding protein jnkbp1.	0.98	EAETQGSLGSLPQAGGCSSQPHSYQNHTTSSMAK+EYSLQQTLDEHSSSITAVK+FAASDGQVR+KTTLYDMDVEPSWK+MISCGADKSIYFR+NNLFTDVACGR+QHHILNSSRK+QIETLAPSPR+RNNLDNSWASKK+SVCISPNGQHLASGDR+VLGVTVSGGRGLACEPRSGLVAYPAGCVVVLFNPR
IPI00229534	Marcks	MARCKS	myristoylated alanine-rich c-kinase substrate.	1	DEAAAAAGGEGAAAPGEQAGGAGAEGAAGGEPR+EAAEAEPAEPSSPAAEAEGASASSTSSPK+EAEAAEPEQPEQPEQPAAEEPQAEEQSEAAGEK+EELQANGSAPAADKEEPASGSAATPAAAEK+EEPASGSAATPAAAEKDEAAAATEPGAGAADK+GEATAERPGEAAVASSPSK+KESGEGAEAEGATAEGAK	0.462469		0.663709		0.990181		0.468618
IPI00281011	Marcksl1	MARCKSL1	marcks-related protein.	1	AAATPESQEPQAKGAEASAASK+EGDTEEEAGPQAAEPSTPSGPESGPTPASAEQNE+GDVTAEEAAGASPAK+GEGESPPVNGTDEAAGATGDAIEPAPPSQEAEAK	0.255813		1.23246		1.39552			1.92542
IPI00120227	Marco	MARCO	macrophage receptor marco.	1	ALSSYGGGSGNIWLDNVNCR+GDMGMKGDTGPMGSPGAQGGK+GDQGKPGVQGVPGPQGAPGLSGAK+GDTGPMGSPGAQGGK+GEPGRTGLPGPAGPPGIAGNPGIAGVKGSK+GERGSPGPKGAPGAPGIPGLPGPAAEK+GTENSLWDCSK+NSWGNHNCVHNEDAGVECS+QGATGAPGPRGEK+TGLPGPAGPPGIAGNPGIAGVKGSK							3.88423	0.885593
IPI00279494	Mark3	MARK3	isoform 1 of map/microtubule affinity-regulating kinase 3.	0.94	KSPAVPSSNTASGGMTR+KSPAVPSSNTASGGMTRR+KSSSSAVGGKGIAPASPMLGNAGNPNK+NSIASCADEQPHIGNYRLLK+SPAVPSSNTASGGMTR
IPI00125188	Masp1	MASP1	complement-activating component of ra-reactive factor precursor.	1	DACAGDSGGPMVTK+DAERDQWYLVGVVSWGEDCGKK+DMICAGEK+DMICAGEKEGGKDACAGDSGGPMVTK+DQVLVSCDTGYK+EGGKDACAGDSGGPMVTK+FPENLMEIEIPIVNSDTCQEAYTPLK+FPENLMEIEIPIVNSDTCQEAYTPLKK+HGLVTFSTR+IEPSQAVYSFK+IVDCGAPAGLK+LNDFVMPVCLPEQPSTEGTMVIVSGWGK+RSDEDEQHLHVK+SDEDEQHLHVK+SLPTCLPVCGVPK+SPEPISTQTHSVQILFR+TTLHPLYNPSTFENDLGLVELSESPR+YGVYSYIYPNK+YSCQQPYYK
IPI00475209	Masp1	MASP1	13 days embryo male testis cdna, riken full-length enriched library,clone:6030458d19 product:mannan-binding lectin serine protease 1, fullinsert sequence.	1	DNEVMDTFQIECLK+DQVLVSCDTGYK+EHVTVYLGLHDVR+HGLVTFSTR+IEPSQAVYSFK+IVDCGAPAGLK+SLPTCLPVCGQPSR+SPEPISTQTHSVQILFR+VLKDNEVMDTFQIECLK+VSNYVDWLWEEMNSPR+WFGSGALLSESWILTAAHVLR+YSCQQPYYK
IPI00467068	Masp2	MASP2	isoform 1 of mannan-binding lectin serine protease 2 precursor.	1	CEYDFVK+LVSPGFPEK+LYFTHFDLELSYR+SWTLTAPPGYR
IPI00346104	Mast4	MAST4	microtubule associated serine/threonine kinase family member 4 isoform1.	0.99	AGLAAPESPVR+CSNPDVACGLGKSLK+EGGPATHQDR+EIITSYSPDHVLPLADGVLSFTHHQIIELAR+ELSLPRRGSLCR+ELSNSASWQHGSSPSHTLK+EPVTQPLGGSIR+EVTLQSLEENVCDAPSLSR+GSLGGALTGR+HLCMVMEYVEGGDCATLMK+KGDSTSLR+REKLSAAPSLQK+SGHFENTSAELPSVGSLLK+SLAETGKPSGMKR+SLAETGKPSGMKRSPSATVQSSLR+SPSPLLGHSLGNAK+YLLPNPVAGQAWPASAETSNLVR
IPI00230760	Mb	MB	myoglobin.	1	HGCTVLTALGTILK+HSGDFGADAQGAMSK+KGQHAAEIQPLAQSHATK+RHSGDFGADAQGAMSK+VEADLAGHGQEVLIGLFK+YKELGFQG									YES
IPI00131088	Mbd2	MBD2	isoform 1 of methyl-cpg-binding domain protein 2.	0.99	GRPQSGGSGLGGDGGGGAGGCGVGSGGGVAPR+GRPQSGGSGLGGDGGGGAGGCGVGSGGGVAPRR+RMDCPALPPGWKK									YES
IPI00131398	Mbl1		mannose-binding protein a precursor.	1	AIQEVATGIAFLGITDEATEGQFMYVTGGR+AVCEFPA+DEPNNHGSGEDCVIILDNGLWNDISCQASFK+KDEPNNHGSGEDCVIILDNGLWNDISCQASFK+LANMEAEIR+LFVTNHEK+LGPPGSVGSPGSPGPK+LGPPGSVGSPGSPGPKGQK+LHAFSMGK+LTYSNWK+SLCTELQGTVAIPR+TCSVIACGR+TCSVIACGRDGRDGPK
IPI00113457	Mbl2	MBL2	mannose-binding protein c precursor.	1	AEFDTSEIDSEIAALR+AEFDTSEIDSEIAALRSELR+ALCSEFQGSVATPR+DIAYLGITDVR+GDRAEFDTSEIDSEIAALR+NAEENSAIQK+NWVLFSLSEK+VEGSFEDLTGNR+WNDVPCSDSFLAICEFSD+YTNWNDGEPNNTGDGEDCVVILGNGK
IPI00336324	Mdh1	MDH1	malate dehydrogenase, cytoplasmic.	0.96	ELTEEKETAFEFLSSA+ETAFEFLSSA+FVEGLPINDFSR+VIVVGNPANTNCLTASK	0.581394	0.676878	0.899896	0.416204		0.988347	2.5498	0.893059
IPI00458039	Mdn1		midasin homolog.	1	ALAIGEQLPVFGECGWQEDINR+CCFGVLTNSSR+DFADILMEPTLEEKKK+DILSWVNFMNSMAEDAAVK+EHATCGQTGVDNVQSAQAVELAGAAPEK+ELMEDSAGEGATQFHDYEGGGIGDGEGMK+EQLLMNALLYLR+GPVLDGHNTGDYALTAGTTAMNAQR+ILATMNPGGDFGK+KEHATCGQTGVDNVQSAQAVELAGAAPEK+LICQHIISGNVK+LIGSHPDVLPFALR+LQVVASEWNLK+QFLVDSVFQPILK+QGGGRKGLPK+VAPTFQLFATR+VMLDLQSYR+YLLGLTELLPAHQR	4.2279					6.04896		2.43785
IPI00750377	Megf6	MEGF6	similar to egf-like-domain, multiple 3.	0.98	AVPCAVIVGVGLTATPSVGSATVWTATR+CVCHAGYELGADGR+EPATALLGSLGPTVALPVHR+IEMEIVNSCEAGNGGCSHGCSHTSTGPLCTCPR+KACEDVDECALGLAQCAHGCLNTQGSFK+LNTDGCGCEGER+MLAQQAGLGPAAR+MPCVGGGGWGWGLEHPISR+QPCVQAFSR+SLSAWITPSAMTAAXPAMTAGMGGPASR+SPCADGNGGCMHTCQELRGLAHCGCHPGYQLAADR+TMAAVSPPPALASVALASMVK
IPI00221701	Megf9	MEGF9	multiple epidermal growth factor-like domains 9 precursor.	0.96	EGFYPSPDAAK+SDSCDVHTGACLNCQENSK
IPI00121254	Mertk	MERTK	proto-oncogene tyrosine-protein kinase mer precursor.	1	EIVSDPIYVEVQGLPYFIK+ISHVWESAGTYK
IPI00130420	Met	MET	hepatocyte growth factor receptor precursor.	1	AFFLLDGILSK+EEVFNILQAAYVSKPGANLAK+LNQVLLTSISTFIK			10.9527		30.7015	6.04896
IPI00133751	Mfap4	MFAP4	isoform 1 of microfibril-associated glycoprotein 4 precursor.	1	ADGEYWLGLQNLHLLTLK+FSTFDRDQDLFVQNCAALSSGAFWFR+WTVFQKR
IPI00137500	Mfap5	MFAP5	microfibrillar-associated protein 5 precursor.	1	QCVHQSCFTSLR			45.787
IPI00117985	Mgp	MGP	matrix gla-protein precursor.	1	YAMVYGYNAAYNR
IPI00229906	Mical3	MICAL3	adult male testis cdna, riken full-length enriched library,clone:4921518d21 product:flavoprotein oxidoreductase mical3, fullinsert sequence (fragment).	0.83	DSDGAGKR+EATGIDLENIVYYK+FEENAPAQSTGVRR+LLPQTTPENVSK			5.97634	3.67117
IPI00280103	Micall2	MICALL2	b cells crl-1669 bcl1 clone 13.20-3b3 cdna, riken full-length enrichedlibrary, clone:g430007e06 product:weakly similar to mical-like 2.	0.98	ALPALTGSGTQAPNR+ENIYENNK+FFQTPPSAPAPASAPAPAPTSKVPTVVTVPTSK+KPCPAGSGPSPAALSPSPSHR+LMDKPEGLK+QLQDIESQLDALELRGVELEK+QQCEGYR
IPI00230427	Mif	MIF	macrophage migration inhibitory factor.	1	LLCGLLSDR+VYINYYDMNAANVGWNGSTFA	0.20913	0.332569	1.00296	0.0487872	1.51841	0.201632	2.52837		YES
IPI00466733	Minpp1	MINPP1	multiple inositol polyphosphate phosphatase 1 precursor.	1	LAALFPDLFSR	16.4728		90.5741		15.8507
IPI00754183	Mki67	MKI67	similar to antigen ki-67.	1	APGTPAPVQEENDCTAYMETPKQK+DPVTVDETTK+EDPSILGK+EESSALTKR+ETLQTAADGTR+GRDAGTPAPMQEENGTTAIMETPK+KAQPLEGPAGLK+KLDSTAGMPNSK+MASSAHLVTIKR+MLNNLMLNR+MSLESSQAEPVK+NIVEPTSGDLFKK+QKLESIENLTGLR+QSENEMLTSTVNGSKR+SSPTQSLSNSNEK+VSFGGHLRPELFDENLPPNTPLKR	4.2279			0.458896				0.162524
IPI00381244	Mll2	MLL2	531 kda protein.	1	ADGGSDRKELMTAMHK+ARPPEESEDSRPPR+CPSLDNLAVPESPGVAGGK+CSISENNGRPEFVIK+FEGVWLTETGMAVLR+FELESGALTLPSGHAAAGDELDK+GEELFGLTVHAVLR+GLGPGVSPFPGQGPPQRPR+GSPVLLDPEELTPVTPMEVYGPECK+KELMTAMHKGDDGPDVADEESHGPEGTADLPGLEDGGVK+LEGPASPDVELGK+LGGPTLGPGAFSSDDR+LPVPQGALSTGPVLGPAHPTPPPSSPQEPK+SGPAPQSGQGPPGAGVMPTVGQLR+SSIVGLPASKLGGPTLGPGAFSSDDR+VEPAPPATSLSLGLKPGQTVMGTR+VMAQGSIGVAPGMNR+VSPAAAQLADTFFGK
IPI00623069	Mll3	MLL3	myeloid/lymphoid or mixed-lineage leukemia 3.	0.97	CEWQNNYTQCAPCASLSSCPVCCR+DVMNSCDITGSTPVLSSLLSNEK+EGELMDCDGK+ERPLLLEEQPLLLQDLLDQER+HGNFLPRPDFPGPR+IPNSYEVSNAPDVPPMGLVSSHR+KSEMLQLFPAYLK+LDNQCASVEPK+LGTCLKPDPVPK+MVTDGAILGK+QAMYSSSDSFTHLK+QPNVPFPPTSNGLSGYK+QSPAEGLQTLGAQMQGGFGGGNSQLPK+SKLKSGIGAVVLPGVSAADISSNK+TEALSPYSK+VMAQNSLGMPPMVMSR+YLEEQIGAHRK
IPI00660193	Mllt4	MLLT4	similar to afadin (af-6 protein) isoform 4.	0.88	LAAGDQLLSVDGRSLVGLSQER+LDIDEKPLVVQLNWNK+MVSMMEGVIQKQKNIAGALAFWMANASELLNFIK+QNGMGLSIVAAK+RQQQLEEMR	0.74558					1.17483	8.43512	5.31356
IPI00112904	Mmp2	MMP2	72 kda type iv collagenase precursor.	1	ELAVQYLNTFYGCPK+FFGLPQTGDLDQNTIETMR+FQGTSYNSCTTEGR+IHDGEADIMINFGR+IIGYTPDLDPETVDDAFAR+TDKELAVQYLNTFYGCPK	4.2279				142.082	36.3427
IPI00356462	Mmrn1	MMRN1	multimerin 1.	0.98	CCPGYIGPNCQLK+CQQNMSHLEENMLSVTK+EKYNFILQIAK+ELSMACRNASTGTCGQNALIPR+ETLSAMTYNPK+FLQSFSR+GEAFERR+ISEHALETEDGLNK+LSPTVILDTGSHLPSGR
IPI00263041	Mmrn2	MMRN2	elastin microfibril interfacer 3.	1	EEEAMTLAELEQEIR+FLVHSQQPCPQGAPDCQGVR+FNTTSINVGSSYFPEHGYFR+GVYLFAVSITFGPGPGMGQLVFEGHHR+VNSDVDVAPEGHR
IPI00405665	Mphosph1	MPHOSPH1	isoform 1 of m-phase phosphoprotein 1.	0.86	ADVEQIQASYNSAVAELQTQK+EELAANSILTQNLKADLQK+ELLDLIEK+GDNCLNTSQQLPGGDFSSTWVK+ICMIINISQSCSAYDETLNVLK+LQDELQESEEK+LQNEVETLTAQLAEKNSELQKWR+QVVSLQQQLR
IPI00113480	Mpo	MPO	myeloperoxidase precursor.	1	ALMFMQWGQFLDHDITLTPEPATR+ALMPFDSLHDDPCLLTNR+DHGLPGYNAWRR+IVGAMVQIITYR+LICDNTGITTVSK+WLPAEYEDGVSMPFGWTPGVNR	4.2279						0.567531	0.713166
IPI00118045	Msh4	MSH4	muts protein homolog 4.	0.96	AASSFPVGTSSSSAR+EIYHMTYMIVCK+ITNLIYLK+LDCVQELLQDEELFFGLQSVISR+SSSSSSSPAPASAPGSSFGNKR+TLASASRPSTEGAMADR
IPI00121279	Msln	MSLN	mesothelin precursor.	1	MNAQAIALVACYLR+QMDLVNEIPFTYEQLSIFK	2.23497	10.4424	21.0006	0.367117			15.8702	38.3842
IPI00330542	Mst1	MST1	hepatocyte growth factor-like protein precursor.	1	AVCGPAGSQLVLLK+CDDDQPPSILDPPDQVVFEK+CGPLLDCR+CTEELVPEGCYHGSGEQYR+EAVCVLCNGEDYR+EAVCVLCNGEDYRGEVDVTESGR+EFCDLPSCGPNLPPTVK+EQWVLTAR+GPWCYTTNR+MAFCHQIPR+NGLEENFCR+NLLHTAVPGPWQEDVADAEECAR+NPDGDSHGPWCYTLDPDILFDYCALQR+NPDGSEAPWCFTSRPGLR+NPDGSERPWCYTTDPNVER+QCIWSCHEPLTGYEVWLGTINQNPQPGEANLQR+QGQHFCGGSLVK+SPLNDFQLFR+TAGGLPCQAWSR+TCIMDNGVSYR+VSVFVDWINK+VVGGHPGNSPWTVSLR+WDAQSPHQHR+WDLQHPHSHPFQPEK+WPAIFTR						8.57344
IPI00762681	Mst1	MST1	adult male thymus cdna, riken full-length enriched library,clone:5830487a16 product:macrophage stimulating 1 (hepatocyte growthfactor-like), full insert sequence.	1	AVCGPAGSQLVLLK+CDDDQPPSILDPPDQVVFEK+CGPLLDCR+CTEELVPEGCYHGSGEQYR+EAVCVLCNGEDYR+EAVCVLCNGEDYRGEVDVTESGR+EFCDLPSCGPNLPPTVK+EQWVLTAR+GPWCYTTNR+MAFCHQIPR+NGLEENFCR+NLLHTAVPGPWQEDVADAEECAR+NPDGDSHGPWCYTLDPDILFDYCALQR+NPDGSEAPWCFTSRPGLR+NPDGSERPWCYTTDPNVER+QCIWSCHEPLTGYEVWLGTINQNPQPGEANLQR+QGQHFCGGSLVK+SPLNDFQLFR+TAGGLPCQAWSR+TCNMDNGVSYR+VSVFVDWINK+VVGGHPGNSPWTVSLR+WDAQSPHQHR+WDLQHPHSHPFQPEK+WPAIFTR						8.57344
IPI00408119	Mtap4	MAP4	microtubule-associated protein 4.	1	DDGLADLLFVSSGPTNASAFTER+DFMAALEAEPYDDIVGETVEK+DMSPLPESEVTLGK+EDSQLASMQHK+HVPGGGNVQIQNK+KPMSLASGSVPAAPHK+MDLAPPEDVLLTK+NTTPTGAAPPAGMTSTR+QPAPTTSGGLNK+RTSPSKPSSAPALKPGPK+SSGALSVDK+VKPMSAPSRSSGALSVDK
IPI00473477	Mtap4	MAP4	microtubule-associated protein 4 (fragment).	0.96	AGGPWDDDNAEER+DESNSIQLGDLAGNKR+IHAPLFSHISGIATEEGADLKSK+KEIASPPCVEK+KVIDDEFLPQR+VRAGSGKSGAK
IPI00137173	Mtch1	MTCH1	isoform 1 of mitochondrial carrier homolog 1.	0.92	FVMGIAVSMLTYPFLLVGDLMAVNNCGLR+MGASDPEVAPWAPGGAAGMAGAGAGAGAR+MGASDPEVAPWAPGGAAGMAGAGAGAGARGGAPAGVEAR	1.49116					3.52448		3.87571
IPI00228583	Mtpn	MTPN	myotrophin.	0.96	GPDGLTALEATDNQAIK+NGDLDEVKDYVAK	0.715502	0.158416	0.647042		1.46198	0.288046	1.33919	0.387571
IPI00668724	Muc16	MUC16	mucin 16.	1	AEEISTGMPTGPPNSIISK+EGNSVTSALDVSWDQK+ENCAMTSMLPALSGQVETK+IISTSAPEK+IPQTTSVSLLGSVEGMKK+ISQMTSVSSVTK+KGTSEVLSTTISNSSPATMTSITK+KYSLFQVGNINGSAMDARK+MMTSTPITSELHATVSLVTHVGAQHSSTMSALTASPGK+NTVIPTLPVSPGQPDTQATWVIHSEK+SDKVPSRTNSSPLEGISSESSWK+SNTDSFSHLTSGLR+TPEYNPDPSESPEKPVVPMRPR	2.27084	2.23127		30.3829			5.95675	21.13
IPI00323412	Muc4	MUC4	mucin-4 precursor.	0.96	EDENASAADVNASVANILENLDMR+GCEACPPNTTGDGR+GSTELQTMSWGTSSSGTITTLSTPVR+ILIGFPLGSSLR+ITQNSTTHTTK+MSTLPQNQHTESMDTSR+SPITVQWFLEPSDK+TIPPGETTTSHASSLSSSGPSTTNMLTR+TQGSTPATTQVSLSSQNISTVSTPMTSTHK+TSSTQITSGDTR
IPI00123223	Mug1		murinoglobulin-1 precursor.	1	AFIFIDESHITHAFTWLSQK+AHFSVMGDILSSAIR+ALMAYAFALAGNQNK+ALMAYAFALAGNQNKR+ALSCLESSWK+AVDQSVLLLKPESELSPSWIYNLPGMQQNK+DGSYSAFGDQNGER+DLFQCVSFIIPR+DPSSNDPLTETIR+EEDSCSYFYCMEER+EEHSFTVMEFVLPR+EGNTWLTAFVLK+ESGEKEEHSFTVMEFVLPR+ESVVFVQTDKPVYKPGQSVK+FALEIPVEFSMVPMAK+FNVDLKVPNAMSVNDEVLSVTACGK+FSTSQSLPASQTR+GGVDDEMTLSAYITMALLESSLPATHPVVSK+GPTHEFSK+HGIPFFVK+HTSSWLVTPK+HVAYAVYSLSK+KDPSSNDPLTETIR+KDPSSNDPLTETIRK+…									YES
IPI00271262	Mug2		murinoglobulin-2 precursor.	1	ALMAYAFALAGNQDK+ALSCLESSWK+DGSYSAFGDQNGER+EDCILYSSWVAEK+EEHSFTVMEFVLPR+EGNTWLTAFVLK+ESVVFVQTDKPVYKPGQSVK+GPTHEFSK+HGIPFFVK+HTSSWLVTPK+LQVTASPQSLCGLR+LTAQPAPSPEDLTLSR+MLIYTILPDGEVIADSVNFEIEK+MLSGFIPLKPTVK+MSLVLPPTVVK+NANFVYTKALMAYAFALAGNQDKR+NKESVVFVQTDKPVYKPGQSVK+NLQPAIVK+NLQPLLQDPK+NTQNLLHMPYGCGEQNMVLFAPNIYVLK+QMSFSLAAEPIQGPYK+SLGNVNFSVSVEAQQSSEPCGSEVATVPETGR+TENGLKQMSFSLAAEPIQGPYKIVVHK+VLIVEPEG…
IPI00120832	Mup3		major urinary protein 3 precursor.	1	AFVENITVLENSLVFK+AGIYYMNYDGFNTFSILK+ENIIDLTNVNR									YES
IPI00653528	Myeov2	MYEOV2	bone marrow macrophage cdna, riken full-length enriched library,clone:i830061k13 product:helicase/primase complex protein homolog.	0.93	AVHADFFNDFEDLFDDDDVQ
IPI00380896	Myh1	MYH1	myosin-1.	1	AEDEEEINAELTAK+AITDAAMMAEELKK+EFEMSNLQSK+ESFVKATVQSR+IEDEQALGMQLQK+IEDEQALGMQLQKK+KDIDDLELTLAK+LEEAGGATSAQIEMNKK+MEIDDLASNMEVISK+RANLLQAEIEELRATLEQTER+SDLSRELEEISER+TLAYLFSGAAAAAEAESGGGGGK+TLAYLFSGAAAAAEAESGGGGGKK							3.96756
IPI00404837	Myh4	MYH4	myosin-4.	0.96	AEDEEEINAELTAK+AITDAAMMAEELKK+DAMVSQLSR+EFEMSNLQSK+IEDEQALGMQLQK+IEDEQALGMQLQKK+KDIDDLELTLAK+LEEAGGATSAQIEMNKK+NLTEEMAGLDENIAK+QLDEKDAMVSQLSR+SDLSRELEEISER							13.3919
IPI00123181	Myh9	MYH9	myosin-9.	1	ANLQIDQINTDLNLER+ASIAALEAK+ELETQISELQEDLESER+EQADFAIEALAK+HEAMITDLEER+KEEELQAALAR+KGMFRTVGQLYK+KLEGDSTDLSDQIAELQAQIAELK+LEEDQIIMEDQNCK+LEGDSTDLSDQIAELQAQIAELK+LVWVPSSKNGFEPASLK+MEDGVGCLETAEEAK+NKHEAMITDLEER+NLEKQIATLHAQVTDMK+QFRTEMEDLMSSK+VAEFTTNLMEEEEK+VEDMAELTCLNEASVLHNLK	0.699763	0.34874	0.696344	0.605847	0.323411	0.406819	0.774224	0.436813	YES
IPI00467393	Myo15	MYO15A	myosin xva isoform 2a.	1	AAAVAAAVASAAAAQEVGRR+ALGENPPHLFAIANLAFAKMLDAK+CHYHHGANPLYSKPKMPLPEFTIK+EGFPVRLPFQVFIDR+ELDGYLDSLFDPVLACGDADLEKPTAIAYR+FQQSLLDLVEKMERCNPLFVR+GQKTQLAVVPGTQVSR+GRAAAVAAAVASAAAAQEVGR+IILLQSRARGFLAR+LFPAMGSVGTGVQILAVSHTGIK+LNVPADGDMCVSLLSR+SLEPPEDPVQTQLHR+VLYALLFGWLITR
IPI00605455	Myo18b	MYO18B	myosin xviiib.	0.9	AFASSLAAVK+AVAGLEGTSQQALHR+ELLSCASVGDQGVASLK+GVTTGTSSAPQPSMPEK+KAVAVGHSQVFLK+LSTLRPMEEKQILQDPDRGGQSGDSDQAYEDR+MGEELSRAVKAEAQQR+QDGLPAHVTSLAQR+QIIEQMTSGPQR+QREKLVSR+RAFASSLAAVK+SFSSHHLSMASIMVVDTPGFQNPR+STSLKCISSEGPEDITLLPDK+TELNLHQMAESSAFGMGLWSKPEDK
IPI00323935	Myo1f	MYO1F	myosin-if.	0.86	KCTPHYIR+LSPPGIMSVLDDVCATMHATGGGADQTLLQK+NMLIDCENQCVIISGESGAGK+YFEIQFSR+YIMGYISK				3.67117				1.2919
IPI00115687	Mzf1	MZF1	myeloid zinc finger protein-2.	0.99	DCGQGFVR+IHGDPPGPAPSILPLAGVPEPPGPFPCSECCESFPR+IHGDPPGPAPSILPLAGVPEPPGPFPCSECCESFPRR+SQSHPRSGTGAMRGGR
IPI00111831	Naca	NACA	nascent polypeptide-associated complex subunit alpha, muscle-specificform.	1	AAATETPIETSTAPSLEGAPKETSETSVSKVLMSSPPK+EATTIPSCKK+EFPASPSIKPVTTSLAQTAPPSLQK+ESSATSSSKR+ETLATSIPK+ETPAPSPEGATTAPVQIPPSPRK+ETPPGGVTAMPLEIPSAPQK+GAPIVPTESSISSK+GAPVPSTGAPPSPK+GPTAFTEMLAAPAPESALAITAPIQK+GSLNKLSPTPPSSKGAPVPSTGAPPSPK+GVPVTLTPKGAPNALAESPASPKK+KDTTLQPLAPIALK+QFPAPPASATLGVPVSPLPATEGLK+QIPTPEDAVTILAGSPLSPKK+QVPLTPSPKDAPTTLAESPSSPK+SPVSDTLSGALTSPPPK+TIELKEAPATLPPSPTKSPK+VLMSSPPK+VPPEAVSASVA…	1.40411	0.908225	2.0572			0.375509	0.366744	0.543601
IPI00123199	Nap1l1	NAP1L1	nucleosome assembly protein 1-like 1.	1	GIPEFWLTVFK+LDGLVDTPTGYIESLPK+NVDLLSDMVQEHDEPILK	0.813631		1.681	0.497097	1.27923	0.357227	2.72837
IPI00320831	Nbea	NBEA	isoform 3 of protein neurobeachin.	1	EIDNLAGPVVLSTPAQLIAPVVVAK+HHIIGDNPNSSDYPAPR+KPPPGSLAVTTVGATAAGSGLPTGSTSSIFAAPGATPK+LFLSDMIK+LFLSDMIKLFSNSRENR+MASDKPGPGLEPQPVALLAVGAGGGAGGGGAMGEPR+QITDLVDQSIQINAHCFVVTADNR+QLNDSQVETTVCATLLAFLVELLK+SMINTTGAVDSGSSSSSSSSSFVNGATSK+SSRVHITRAVLEQFLSFAK+SSVAMQEQMLGGK
IPI00122971	Ncam1	NCAM1	isoform n-cam 180 of neural cell adhesion molecule 1, 180 kda isoformprecursor.	0.92	CGLLMCIAVNLCGK+EPIVEVR+FFLCQVAGDAK+IYNTPSASYLEVTPDSENDFGNYNCTAVNR+LPSGSDHVMLK+NVDKNDEAEYVCIAENK+SEPPESEAKPAPTEVKTVPNDATQTK				9.01351				15.3785
IPI00406997	Ncoa2	NCOA2	adult male urinary bladder cdna, riken full-length enriched library,clone:9530095n19 product:nuclear receptor coactivator 2, full insertsequence.	0.86	EEILLTLEK+VTCAATTGAMNRPVQGGMIR
IPI00349292	Neb	NEB	similar to nebulin.	1	ANALNVSNK+ANVHIPNDMMNHVLAK+AYWNASDLSSLRCK+CQTLVSDIDYR+CQVLVSDVDYR+DKFTSVVDTPEHLR+ERPHHHAGNQTTALQHAKDVK+GIGCYAYDTPDLTLAEQNK+GIGWMPEGSIEMTRVK+GIGWMPEGSPEVLR+GIGWMPNDSVSVNHAK+GIGWSPMGSLEAEK+GIGWVPIGSLDVEK+GIGWVPIGSLDVEKCK+GIGWVPIGSLEVVK+GQKLQSQYLYVELATK+GYDLPVDAIPIKAAK+HSLHHYTYLPDAMDLELSK+ILVHYVATIVLVPGR+INIPADMVSVVAAK+INIVPDMVEMVTAK+KAQDVISNTNYK+KCQTLVSDVDYR+KGYDLPVDAISVQLAK+KGYDLRVDAIPIVAAK+LVLSMN…									YES
IPI00755239	Neb	NEB	similar to nebulin.	1	CSCQLSQLYK+EAXVYSESXSPTVSPGQVQCLQHK+EPTAQAAEDSWK+ESALHHSGXPAR+GHPHSQGXQQDPVGPHR+GQIHLGCGHPR+GSADLEGAWLLPVXHSXHGPLPAPK+HGETLXYYTIQGSLGGHQGLR+HPRSAGLXSPERXCVQGXSSVAER+LGHSXNSPCK+LLQDAGPHDLPAVYTPSVALSLR+LXLGIVQREHEK+NGGSGPGPPR+QDQHSCHAXHSR+QEGLXPENXCHPHQSR+QGIVLSLXXQSGAEK+QPALQNYER+QXSSLQR+QXXELQSR+SQTQSRKLXLGIVQR+TEASESVSLCXTCYXR+XTLQSVSGGGQEAR									YES
IPI00127280	Ngp		myeloid bactenecin.	1	DCDFLEDGEER+LLSATPPSSQNPATNIPLQFR+QSTSLTLTCDR+YDIIGNILK
IPI00421052	Nipbl	NIPBL	isoform 1 of nipped-b-like protein.	0.99	AFLISLLNLFDDTAK+CLPENSAPLIEFANVSQGILLLLMLK+CLSEVVAVDPSILAR+EKSMQNRYVQSGMMMSQYK+EMGDVSSGMSSSIMQLYLK+EVQDKDKPLKK+ILNITDVVAACR+KYAGFIHMKAVAGMK+LDMQRGVHGRLMDNSTSVR+LVACITTLFLFSK+SIIKTTPSQFSTLKMNSDTVDYDDACLIVR+SPSDSDMEDYSPPPSLSEVAR+SQHQEDPNNTSLLTNKPALLR+TSSGVSVQWMAGSYSGSWTEAKR+VASLDYLGTVAAR+VDPHGGGLLSSK+VIVMLYNK+YVQSGMMMSQYK
IPI00225222	Nlrp4a		nacht, lrr and pyd domains-containing protein 4a.	0.96	GTESKPQVVFLSGGAGVGK+LLCDVLSQAECNIEELVVAACSISSDDCK+LSFSTQNVLSGAQEHSYMER+MLPESSLLISATPESFEK+QEVLQLGLK
IPI00128349	Nlrp6		nacht, lrr and pyd domains-containing protein 6.	1	LLCEGLAWPK+LVSCGLVAAK+MDAAGASCSSVDAVAR+QALSSLPEIVLER+TPGTPAGGVQK
IPI00131459	Nme1	NME1	nucleoside diphosphate kinase a.	1	EISLWFQPEELVEYK+TFIAIKPDGVQR+VMLGETNPADSKPGTIR+YMHSGPVVAMVWEGLNVVK	1.05346		1.33337			0.13396	0.744593	0.664195	YES
IPI00625464	Nol9	NOL9	activated spleen cdna, riken full-length enriched library,clone:f830213j09 product:hypothetical arginine-rich regionprofile/peptidase m14, carboxypeptidase a/c-type lectin containingprotein, full insert sequence.	0.81	SPPTPSVPPAPCTASATCSLLNPR									YES
IPI00403538	Nos1ap	NOS1AP	adult male corpora quadrigemina cdna, riken full-length enrichedlibrary, clone:b230364i19 product:hypothetical glycine-rich regioncontaining protein, full insert sequence (fragment).	1	GSGGGGGGGGGAGCLSR+GSGGGGGGGGGAGCLSRR+KGSGGGGGGGGGAGCLSRR+KKGSGGGGGGGGGAGCLSR
IPI00311671	Nos3	NOS3	nitric oxide synthase 3, endothelial cell.	0.97	ATILYGSETGR+ESSNTDSAGALGTLR+GAVPWSFDPPGPEIPGS+GLQPAPMTLVFGCR+KLQSRPTQGPSPTEQLLGQAR+KMFQATILSVENLQSSK+LPPDPNLPCILVGPGTGIAPFR+MGNLKSVGQEPGPPCGLGLGLGLGLCGK+RSGSQAHEQR
IPI00322561	Notch1	NOTCH1	transmembrane receptor notch1.	1	AICTCPSGYTGPACSQDVDECALGANPCEHAGK+CLNGGTCISGPR+FEEPVVLPDLSDQTDHR+GTQGVHCEINVDDCHPPLDPASR+INEFQCQCPK+NGGACVDGVNTYNCR+QDVNECSQNPGLCR+QWTQQHLDAADLR+SGWTGVNCDVLSVSCEVAAQKR	4.2279
IPI00467908	Notch2	NOTCH2	notch gene homolog 2.	1	CEADINECDIPGR+CEMDINECHSDPCQNDATCLDK+CLCDAGWVGVNCEVDK+CQNGGTCVPQGMLGKATCR+CQNGGVCVDGVNTYNCR+DTYECTCQVGFTGK+EPVGQDAVGLK+GADCTEDVDECAMANSNPCEHAGK+GLLCEENIDECAGGPHCLNGGQCVDRIGGYTCR+IGGFTCLCMPGFK+NCQTLVNLCSR+NCQTVLAPCSPNPCENAAVCK+QDSQGALMVYPYFGEK+SLPEEQEQEQEVIGSK+TGEMALHLAAR+VASFSCLCPEGK	3.56123				1.05317		0.869593
IPI00620432	Notch3	NOTCH3	neurogenic locus notch homolog protein 3 precursor.	1	ADAAKRLLDAGADTNAQDHSGR+CAEGFEGTLCER+CETDVNECLSGPCR+CETPSAAPEVPEEPR+CQCPLGYTGLLCENPVVPCAPSPCR+CVCHPGFTGPR+DRTCNPVYEKYCADHFADGR+ELQCPVGIPCQQTAR+LCDIQSLPCTEAAAQMGVRLEQLCQEGGK+NVDDCSPDPCHHGR+REPVGQDALGMK+VEEPGMGAEEPEDCR	13.9116					8.57344
IPI00132307	Nov	NOV	protein nov homolog precursor.	1	CPSISPTCAPGVR+CQLDVLLPGPDCPAPR+DGQIGCLPR+FEPNCQYFCTCR+GESCSEMRPCDQSSGLYCDR+KVAVPGECCEK+QRGESCSEMRPCDQSSGLYCDR+SVLDGCSCCPVCAR	17.1395		25.8817		8.42537	13.6224	28.2621
IPI00762688	Nptn	NPTN	31 kda protein.	1	AEDSGEYHCVYHFVSAPK+IVTSEEVIIR+NGVELTATR+RPDEVPDGGR+SENKNEGQDAMMYCK	1.35783	0.820461					0.744593
IPI00114939	Nptxr	NPTXR	neuronal pentraxin receptor.	0.96	AELLLLQSTAEQLR+CESGLPRGLQDAGPRR+DSNWHHICISWTTR+DTMADGAWDSPALLLELEDAVR+QEVEKELNALQGRVAELEHGSSAYSPPDAFK+VAELEHGSSAYSPPDAFK
IPI00118874	Npy	NPY	neuropeptide y precursor.	1	SSPETLISDLLMK+TRLEDPSMW
IPI00381093	Nr3c2	NR3C2	nuclear receptor subfamily 3, group c, member 2 isoform 2.	0.98	CLQAGMNLGARK+DYYSLSGILGPPVPGFDSSCEGSAFPGGIK+ELSATVAESMGLYMDSVR+GNPTVNPFPFMDGSYFSFMDDK+GYHSLPEGLDMER+GYHSLPEGLDMERR+INPSSPFSVPIKQESSK+RSDGYPVLEYIPENVSSSTLR+SFMPDSGTSMNGGALR
IPI00311626	Nsbp1	NSBP1	nucleosome-binding protein 1.	0.92	DECNMENAENGEAKIMEAPIPK+DTGEEVEDGKIEEEGLNEKPGTAK+EDQPEEDGKEGQCK
IPI00387232	Nsfl1c	NSFL1C	isoform 3 of nsfl1 cofactor p47.	1	ASSSILINEAEPTTNIQIR+EFVAVTGTEEDR+LGAAPEEESAYVAGER		17.9604	1.9909		23.2761		5.95675
IPI00124639	Nt5c	NT5C	5'(3')-deoxyribonucleotidase, cytosolic type.	0.94	EMNDMKDTEVFICTTPLLK+TVVMGDLLIDDK+WVEQNLGPEFVER									YES
IPI00471207	Ntn2l	NTN2L	netrin-2-like protein precursor.	0.93	MPTWLWGLLLTAGTLSAALSPGLPASADPCYDEAR+RYLLLGGGPGAAAGSTAGR+YLLLGGGPGAAAGSTAGR+YLLLGGGPGAAAGSTAGRGQGLSAAR
IPI00132314	Nucb1	NUCB1	nucleobindin-1 precursor.	1	ADTDDAPVPAPAGDQK+ADTDDAPVPAPAGDQKDVPASEK+DLAQYDAAHHEEFK+DLAQYDAAHHEEFKR+DLELLIQTATR+EFGDTGEGWK+ELQQAVLQMEQR+EVWEELDGLDPNR+EVWEELDGLDPNRFNPK+FEEELAAR+KQQLQEQSAPPSKPDGQLQFR+KVPEQPPELPQLDSQHL+LSQELDFVSHNVR+LVTLEEFLASTQR+LVTLEEFLASTQRKEFGDTGEGWK+MLLKAKMDAK+NEEDDMREMEEER+QEPNLQVDHMNLLK+QFEHLDPQNQHTFEAR+QQLQEQSAPPSKPDGQLQFR+TFFILHDINSDGVLDEQELEALFTK+TVEMSPAYTEEELK+TVEMSPAYTEEELKR+VNVPGSQAQLK+YLESLGEEQR…	0.702324	0.619323	4.15283	0.310811	39.9353	5.3823	1.06043		YES
IPI00420602	Nup188	NUP188	nucleoporin 188.	0.92	GAPSSPAAGVLPSPQGK+HLVGGTMDPFVDR+HTLSPEETSSVVR+ILLIIAASHADVMHLTDMAVRR+KSLDAPSWPGVYR+LATVAPMSVYACLGSDAAAIRDAFLTR+QLFLDVLDGTK+RDSAMLVLR+RGAPSSPAAGVLPSPQGK+TEAPTWETHGNLMTER+YNFLTEALDFVGVHQER
IPI00224574	Nwd1	NWD1	12 days embryo embryonic body between diaphragm region and neck cdna,riken full-length enriched library, clone:9430051h19product:hypothetical atp/gtp-binding site motif a (p-loop)/g-proteinbeta wd-40 repeats containing protein, full insert sequence.	0.98	ACPYPMLVPLAGFLQPPGGPLR+QDVLCIPPPEARK+QEVLGNMSWISCR+RHGVLAEFFSGAWSQGIKK+WASFTVPVPLATTAEEATHQLCIR
IPI00154044	Oaf	OAF	bone marrow macrophage cdna, riken full-length enriched library,clone:i830001f17 product:similar to out at first protein (hypotheticalprotein), full insert sequence.	1	ALEQAELPR+ALILGELEK+GQSQFQALCFVTR+GVDSSVFEALPK+KPDGTLISFIADFK+KPDGTLISFIADFKK+KSYTFDFYVPQK+LHHNDIIPSEAMAK+LPDSQVIEESLQADSDADSISLDLR+QEDVQFWTER+SYTFDFYVPQK			5.97634		23.2761	3.52448
IPI00187557	Obp1a		10 days neonate head cdna, riken full-length enriched library,clone:5530600l21 product:odorant binding protein ia, full insertsequence.	0.97	LVDESPENLTFYSENVDR
IPI00123782	Odz2	ODZ2	teneurin-2.	1	CEEGWTGAACDQR+CGDGGKAVDATLMSPRGIAVDK+DLAGNSEVVAGTGEQCLPFDEAR+DNEGDGLVDCLDPDCCLQSACQNSLLCR+EPAPFNLYMFK+IGAADGDLVTLGTTIGR+IGAADGDLVTLGTTIGRK+KVLESGVNVTVSQPTLLVNGR+LGPYANTTK+NGLMYFVDATMIRK+SFQASPNLAYTFIWDK+SITIDIENSNR+VHLMVAVEGHLFQK
IPI00123783	Odz3	ODZ3	isoform 1 of teneurin-3.	0.92	FADVEMQFGALALHVR+GICIMGSCACNSGYK+IAAGRPMHCQVPGVEYPVGK+QDGMFDLVANGGASLTLVFER+QLLSAGKVQGYDGYYVLSVEQYPELADSANNIQFLR+QVTTDGEISLVAGIPSECDCK+SPFLTQYHTVWIPWNVFYVMDTLVMKK	3.56123	5.98679		25.0405			1.98558	11.3569
IPI00157497	Odz4	ODZ4	isoform 3 of teneurin-4.	0.99	FTEEGMVNAR+GAECDVPTNQCIDVACSSHGTCIMGTCICNPGYK+LLAPVALTCGSDGSLYVGDFNYIR+LLTQEAR+LNGVNVTYSPGGHIAGIQR+LSSVTMPNVARQTLETIRSVGYYR+QDGSFDLVTNGGISIILR+QSEMGRR+QVTTSGEISLVAGAPSGCDCK+SISCPSCNGLADGNK+VDQNGIISTLLGSNDLTSARPLSCDSVMEISQVR
IPI00120848	Ogn	OGN	mimecan precursor.	0.99	ETMIIPDEK+RLDFTGNLIEDIEDGTFSK
IPI00127577	Olfr560		olfactory receptor 560.	0.97	GTVMLTPMVALLK+IAQIGVTIVIRGTVMLTPMVALLKR
IPI00127961	Olfr676		olfactory receptor mor32-1.	0.82	IIVVIAVLVVIR
IPI00118130	Orm1	ORM1	alpha-1-acid glycoprotein 1 precursor.	1	AVTHVGMDESEIIFVDWK+AVTHVGMDESEIIFVDWKK+ETKKDPEEGQA+HGAFMLAFDLK+HGAFMLAFDLKDEK+HGAFMLAFDLKDEKK+KDPEEGQA+KHGAFMLAFDLK+KHGAFMLAFDLKDEK+KQLELGK+QLELGKETK+RPDITPELR+RPDITPELREVFQK+WFFMGAAFR+YEGGVETFAHLIVLR+YEGGVETFAHLIVLRK	4.2279			6.34234		33.3183	1.55907
IPI00127856	Orm2	ORM2	alpha-1-acid glycoprotein 2 precursor.	1	AVTHVGMDESEIIFVDWK+AVTHVGMDESEIIFVDWKK+ETKKDPEEGQA+IFADLIVLK+KDPEEGQA+MHGAFMLAFDLK+MHGAFMLAFDLKDEK+QQLELEK+QQLELEKETK+RPDITPELR+RPDITPELREVFQK+WFFIGAAVLNPDYR+WFFIGAAVLNPDYRQEIQK						24.4826	2.97837		YES
IPI00134514	Orm3		alpha-1-acid glycoprotein 3 precursor.	1	AVTHVGMDESEIIFVDWK+AVTHVGMDESEIIFVDWKK+DDHCVYNSNLLGFQR+HGAIMLFFDLK+HGAIMLFFDLKDEK+RPDIPPELR+WFLIAVADSDPDYR+WFLIAVADSDPDYRQEIQK
IPI00222137	Osbpl6	OSBPL6	osbpl6 protein.	0.83	FLEEGNLEAAAAEK+TQSAPNFTDMQANCVDISKK
IPI00125923	Ostf1	OSTF1	osteoclast-stimulating factor 1.	0.99	GYADIVQLLLAK+MSKPPPKPVKPGQVK+TGLIPSNYVAEQAESIDNPLHEAAK
IPI00113302	Otof	OTOF	isoform 1 of otoferlin.	0.84	EEMESAEGLKGPMK+FYVKIYRAEGLPR+LELWVDMFPMDMPAPGTPLDISPR+MNTSLMANVKK+RVNLAQVDRPR+WAILSDPDDISAGLKGYVK
IPI00116670	Otog	OTOG	otogelin.	0.98	ALMEYAR+CACTDSTGVPR+CPQVQCGMGTSLVEVWSPDR+GPYQLSSVAAGGTLVATK+SNTPVNLVSCDGR+STSELSFSVMVEDVNCYGSGVICRK+VQLPQVVGGVQLQQLAGYVIAR+VTITFTGSPNTTVASR+YDACASPCFQTCR+YECVKAPVCLSR+YTFPATCQYILAK+YVQQPCVALTVYVAMCHK
IPI00118469	Oxt	OXT	oxytocin-neurophysin 1 precursor.	1	AVLDLDMR+CAATGICCSPDGCR+CFGPSICCADELGCFVGTAEALR+CLPCGPGGK+CQEENYLPSPCQSGQKPCGSGGR+MACPSLACCLLGLLALTSACYIQNCPLGGK
IPI00116548	Pap	REG3A	regenerating islet-derived protein 3 beta precursor.	1	GSQAYGSYCYALFQIPQTWFDAELACQK+RPGGHLVSVLNSAEASFLSSMVK
IPI00110468	Papln	PAPLN	papilin.	1	AEQCAEFDGTDFQGR+APTLQRPPHQPPLRPSSGPR+CLQCGGDGSSCYPVTGTFDGNDLSR+CVDLQSSKPAEMEACNR+DAVVDGTPCEPGQR+ELTITGLPPAVTVAEGDTAR+FGCCYDNVASAAGPLGEGCVGQPSYAYPVR+GEYYLNGHWTIEAAQALPVASTVLQYER+GPTSEPLVIELLSQESNPGVHYEYYLPANDPGR+GTGAEAGGHRVLSPSHPRPATRLR+GVEGDLAPER+GYNQIFIIPAGATSIR+HSPHGCCPDGHTPSLGPQWQGCPLAGASCLQSR+RDGGTSCVGPAR+TQPGVVDASPGQRIR+YGCCPDGVSAAEGPQQAGCTR
IPI00117264	Park7	PARK7	protein dj-1.	1	AGIKVTVAGLAGKDPVQCSR+GAEEMETVIPVDVMR+TQGPYDVVVLPGGNLGAQNLSESPMVK+VTVAGLAGKDPVQCSR	0.554749	0.0955339	0.706687	0.17027	1.60538	0.106802	0.372297		YES
IPI00112473	Parp1	PARP1	isoform long of poly [adp-ribose] polymerase 1.	0.92	ALVEYEIDLQKMPLGKLSR+GFSLLSAEDK+MKLTLKGGAAVDPDSGLEHSAHVLEK+VADGMAFGALLPCK	2.45217	0.384591	0.479291		0.702114	0.50408	0.434797		YES
IPI00121093	Pcdh15	PCDH15	protocadherin-15 precursor.	0.83	NGTILVDNMLIK
IPI00356667	Pcdh17	PCDH17	protocadherin 17.	0.99	DSGAPAHLESNATVR+ETQDDYNVTIVAR+NDNAPSIGFVSVR+QGALSEAAPPGTVIALVR+RALSPLLQEVPSASSSPTK
IPI00453850	Pcdha3	PCDHA3	protocadherin alpha 3.	1	CSTAPTEGGPGKPMLVCSSAVGTWSYSQQR+CSTAPTEGGPGKPMLVCSSAVGTWSYSQQRR+QRVCSGEGPPKTDLMAFSPSLTPCPVNQDK
IPI00225140	Pclo	PCLO	piccolo.	1	ENPELVDDLSPRR+ETKSQESEELVVAGGGGLR+FMGSSLGSGLGTLGNTIR+GAHAHSGPTSAGSSSVPSPGQPGSPSVSK+GTESLDHLAGLSHYYHADTSYR+KEKKPPAAEAPPLEEK+QAELDEEEKEIDAK+QAPPPSQTLAAQGPPK+QEDSQGSGEDEDFIRK+QQGPGKEVIPQDIPSKSVSSQQAEK+TASHPITGEIQLQINYDLGNLIIHILQAR+TLPNPPPEEASTGTQSTYSTMGTASRR+TNTMARAKILQDIDR+TSIGSSSSEEYK+TTKPKPACPLCRTELNVGSQDPPNFNTCTECK
IPI00377933	Pcsk9	PCSK9	proprotein convertase subtilisin/kexin type 9 precursor.	1	ALNAFGGEGVYAVAR+CAPEEELLSCSSFSR+CAPEEELLSCSSFSRSGRR+DIIGASSDCSTCFMSQSGTSQAAAHVAGIVAR+GTVSGTLIGLEFIR+KSQLIQPSGPLVVLLPLAGGYSR+MSFPRPR+MSSDLLGLALK+SQLIQPSGPLVVLLPLAGGYSR+VTITDFNSVPEEDGTR			692.711	252.09
IPI00460063	Pcyox1	PCYOX1	prenylcysteine oxidase precursor.	1	AGFSETFLNEMIAPVMK+ELGLSSVPASGGLVGVYNGK+IAIVGAGIGGTSSAYYLR+LLNQTLR	1.69728	2.91006		2.56672		3.52448	3.0581	8.07486
IPI00785325	Pdcd11	PDCD11	mkiaa0185 protein (fragment).	0.98	IIDYSQMDELALLSLRK+ILDDVPVGTSPTTTLKAGKK+ISYQQLGAVLDDVPVQGFFKNAGAIFR+KPALVSTVEGGQDPK+LPLITCYEGAKPGLQTHGVIIR+MGSYSSNQTVK+YHDIKIGTVVK
IPI00116120	Pdcd5	PDCD5	programmed cell death protein 5.	1	AVENYLIQMAR+LSNLALVKPEK+NSILAQVLDQSAR	1.06837		2.73817		2.26439
IPI00276327	Pde4b	PDE4B	phosphodiesterase 4b, camp specific.	0.9	GMEISPMCDK+HMSLLADLK+QNDVEIPSPTQK
IPI00137730	Pebp1	PEBP1	phosphatidylethanolamine-binding protein 1.	1	GNDISSGTVLSDYVGSGPPSGTGLHR+KYNLGAPVAGTCYQAEWDDYVPK+LYEQLSGK+LYTLVLTDPDAPSR+LYTLVLTDPDAPSRK+VDYAGVTVDELGK+YNLGAPVAGTCYQAEWDDYVPK+YVWLVYEQEQPLSCDEPILSNK	2.71373	0.293022	1.82256	0.117059	3.30423		3.12034	0.312562	YES
IPI00123302	Penk1	PENK	proenkephalin a precursor.	0.95	DADEGDTLANSSDLLK+KMDELYPMEPEEEANGGEILAKR
IPI00469870	Per3	PER3	per3.	0.8	HVGLTAAVLSAHTQK+KCISCTNTSSSSEEAKPIPEVDSSQR+MDPCGDPAVLGGDCPQTR
IPI00224740	Pfn1	PFN1	profilin-1.	1	SSFFVNGLTLGGQK+TFVSITPAEVGVLVGK	1.44974	0.462702	2.15821	0.404172	2.28811	0.544575	1.62871	0.191305
IPI00457898	Pgam1	PGAM1	phosphoglycerate mutase 1.	1	ALPFWNEEIVPQIK+DAGYEFDICFTSVQK+HLEGLSEEAIMELNLPTGIPIVYELDK+YADLTEDQLPSCESLKDTIAR	0.933304	0.558097	1.4271	0.160756	0.737782		5.05675		YES
IPI00761184	Pgcp	PGCP	48 kda protein.	1	AIINLAVYGK+AIQIMYQNLQQDGLENVHLEQVR+EIKEEIANYEDVAK+GALDDGGGAFISWEALSLVK+GEESAVMLEPR+IIVYNQPYTGYEK+LGLLVDTVGPR+VFSNGEGTDINFWIQAGVPGASLRDDLYK+VGAVASLIQSVASFSIYSPHTGIQK+VQGAVEAAK+YSLVMEADSGTFLPTGLQFTGSDK
IPI00555069	Pgk1	PGK1	phosphoglycerate kinase 1.	1	DCVGPEVENACANPAAGTVILLENLR	0.771101	0.796971	1.57378	0.612485	1.02154	0.357954	3.05961	0.98659	YES
IPI00132080	Pgls	PGLS	6-phosphogluconolactonase.	1	DLPAAAAPAGPASFAR+EGTLPAALVQPR+LPIPDSQVLTINPALPVEDAAEDYAR+MAAPAPSLISVFSSPQELGASLAQLVAQRAASCLEGDR+TGALCWFLDEAAAR			1.2798		0.880597		1.40585		YES
IPI00132111	Pglyrp1	PGLYRP1	peptidoglycan recognition protein precursor.	1	AALNLLECGVSR+DVQSTLSPGDQLYQVIQSWEHYRE+MLFACALLALLGLATSCSFIVPRSEWR+NELGWCDVAYNFLIGEDGHVYEGR+YVVISHTAGSFCNSPDSCEQQAR							1.94211
IPI00165807	Pglyrp2	PGLYRP2	isoform 1 of n-acetylmuramoyl-l-alanine amidase precursor.	1	DALPSCAIR+EFTEAFLGCPAIHPR+EYYGAGVNGDPVFR+GWHWVGAHTR+KWDDIGYSFVVGSDGYLYQGR+LEPEHLQLQNISQEQLAQVATLATK+LLAITLAGDLGLTFLHR+QLVLTHCPGNALFNLLR+SQTWSPPGLGTEGCWDQLTAPR+TWPHFTEVEN+VFTLLDPQASR+VPVTEASITASAWILSAK+WDDIGYSFVVGSDGYLYQGR	7.4558					69.161
IPI00380409	Phr1	MYCBP2	isoform 2 of probable e3 ubiquitin-protein ligase mycbp2.	0.95	AASQNMIFPSPGSCAVLKK+CSILSPELALPTGSR+DLGNKVTSMTFLTGKAVEELCR+EFALMKTANGKIYYTGK+ELANLGGVCAAALMK+ELANLGGVCAAALMKK+ETSLAAASK+FSADTDILLGGLGLFGGR+GTEGLSASESLMLK+ILSEGVDHCMVK+IPGSPSAAASSADMTFGGLASPK+LEQCMVCTVCGDCTGYGASCVSSGRPDR+LPTSDGSTSKGK+MLVIVVLPVR+RIYTTALSDR+SMMCPPGMHK+SNNGTDVNAGQIPQLLYR+TANGDGGMTTVQCPDGVTFTFSTCSLSSNGTNQTR+TSSSRLLAAVMSALCHTSVK+VQRQVTSLLR+VSGPSSDCGSHGQASITTDDGVIFQFK
IPI00113610	Pi16	PI16	protease inhibitor 16.	1	AESPEAEAESPLSSEALVPVLPAQER+AQVSPPASDMLQMR+ASLEHSGHPASPSLPTFPSASGNATGGR+ATEAPSSR+EPEAESPKAESPEAEAESPLSSEALVPVLPAQER+GRKPYQEGTPCSQCPLGYSCENSLCEPMR+GRKPYQEGTPCSQCPLGYSCENSLCEPMRNPEK+IGCGSHFCETLQGVEEANIHLLVCNYEPPGNVK+KPYQEGTPCSQCPLGYSCENSLCEPMR+KPYQEGTPCSQCPLGYSCENSLCEPMRNPEK+MSLTESGESVPQIQEEAEPK+QTMVDLHNQYR+TLALQSSWTGAENPEK+WDDELAAFAK
IPI00380261	Pik3ip1	PIK3IP1	isoform 1 of phosphoinositide-3-kinase-interacting protein 1precursor.	1	CLNWLAAQGSR+GPWCYISSETGVPEK+MLLAWVHTFLLSNMLLAEAYGSGGCFWDNGHLYR
IPI00341034	Pik4cb	PIK4CB	phosphatidylinositol 4-kinase beta.	0.95	EEEDEMGAGVASGTAK+EEEDEMGAGVASGTAKGARR+FHMSMTEEQLQLLVEQMVDGSMR+LILSDELKPAHR+LISELSLLNHK+MLMLQGLIAARK+QSINFSLQCALLLGAYSSDMHISTQR					8.42537
IPI00407130	Pkm2	PKM2	isoform m2 of pyruvate kinase isozymes m1/m2.	1	AEGSDVANAVLDGADCIMLSGETAK+CDENILWLDYK+DAVLNAWAEDVDLR+EATESFASDPILYRPVAVALDTK+GADFLVTEVENGGSLGSK+GDLGIEIPAEK+GDYPLEAVR+ITLDNAYMEK+IYVDDGLISLQVK+LAPITSDPTEAAAVGAVEASFK+LDIDSAPITAR+LDIDSAPITARNTGIICTIGPASR+LNFSHGTHEYHAETIK+NTGIICTIGPASR+NVREATESFASDPILYRPVAVALDTKGPEIR+RFDEILEASDGIMVARGDLGIEIPAEK+VNLAMDVGK	0.815591	0.848825	1.10575	0.633351	0.713158	0.558075	1.78837	0.814741
IPI00845840	Pkm2	PKM2	isoform m1 of pyruvate kinase isozymes m1/m2.	1	AEGSDVANAVLDGADCIMLSGETAK+AGKPVICATQMLESMIK+CDENILWLDYK+CLAAALIVLTESGR+DAVLNAWAEDVDLR+EATESFASDPILYRPVAVALDTK+GADFLVTEVENGGSLGSK+GDLGIEIPAEK+GDYPLEAVR+ITLDNAYMEK+IYVDDGLISLQVK+LDIDSAPITAR+LDIDSAPITARNTGIICTIGPASR+LNFSHGTHEYHAETIK+NTGIICTIGPASR+NVREATESFASDPILYRPVAVALDTKGPEIR+RFDEILEASDGIMVARGDLGIEIPAEK+VNLAMDVGK	0.815591	0.848825	1.10575	0.633351	0.713158	0.558075	1.78837	0.814741
IPI00329896	Pla2g7	PLA2G7	12 days embryo spinal ganglion cdna, riken full-length enrichedlibrary, clone:d130049o18 product:phospholipase a2 group viisequence.	1	ALSAILDIEHGDPKENVLGSAFDMK+ASMAFLQK+CGVALDPWMYPVNEELYSR+GSVHQNFDDFTFVTGK+IALMGHSFGGATVLQALSEDQR+LYYPAQDQGR+SASATYFFEDQVAAK+TLQPLLFINSAK+VAIDLTNK
IPI00229509	Plec1	PLEC1	isoform plec-1i of plectin-1.	1	AAEEAEEAR+DDPSGQMLLLLSDAR+DDPSGQMLLLLSDARK+DPYTEQTISLFQAMKK+EQLNEYKGHLSGLAK+ETELPAKEADKNR+EVLEMESAWR+FLEGTSCIAGVFVDATK+FLEVQYLTGGLIEPDTPGR+KELIPAEEALRLLDAQLATGGIVDPR+LLEAQIATGGIIDPEESHR+MVEGYQGLR+NLQKFLEGTSCIAGVFVDATK+QELMASMEEAR+QEQIQAVPIANCQAAR+QLQLAQEAAQKR+QVEEEIMALK+QVEEEIMALKVSFEK+RAAEEAEEAR+RGSFDATGSGFSMTFSSSSYSSSGYGR+RQVQDESQR+SMVEEGTGLRLLEAAAQSSK+SSIAGLLLKPTNEK+VIYQSLEGAVQAGQLK+VQSGSESVIQ…	4.71906	3.59208	0.995698	0.81941	0.20519	0.470738	0.712715	0.23652
IPI00322936	Plg	PLG	plasminogen precursor.	1	CEGETDFVCR+CQSWAAMFPHR+CSETGGSVVELPTVSQEPSGPSDSETDCMYGNGK+CSETGGSVVELPTVSQEPSGPSDSETDCMYGNGKDYR+CTTPPPPPSPTYQCLK+DKYILQGVTSWGLGCARPNKPGVYVR+DVILFEK+EAQLPVIENK+EQQCVIMAENSK+FTGQHFCGGTLIAPEWVLTAAHCLEK+FVDWIER+GPWCYTTDPSVR+GSDVQEISVAK+GTSSTTITGK+GTVSVTVSGK+HSIFTPQTNPR+KCQSWAAMFPHR+KLYDYCDIPLCASASSFECGKPQVEPK+KQLAAGGVSDCLAK+LILEPNNR+LILEPNNRDIALLK+LKEAQLPVIENK+LSRPATITDK+LYDYCDIPLCASASSFECGKPQVEPK+MR…	33.279	6.65346	30.858	27.7117	75.2537	74.21	0.917709	0.571944	YES
IPI00135560	Pltp	PLTP	phospholipid transfer protein precursor.	1	ATYFGSIVLLSPTVINSPLK+AVEPQLEDDER+EVVTNHAGFVTVGADLHFAK+GVQIPLPEGINFVR+MYNFFSTFITSGMR+RFQIYSNQSALESLALIPLQAPLK+TLLQIGVMPLLNER	39.7348	12.3069		57.0946	67.8284	54.0141		6.75141
IPI00115116	Plvap	PLVAP	plasmalemma vesicle-associated protein.	1	FQADVLSAWR+QQQEQQVTEENLR+QQQEQQVTEENLRK+QQQEQQVTEENLRKVQSLCIPLDQEK+TCESLPGIMTTK
IPI00471179	Plxdc2	PLXDC2	plexin domain-containing protein 2 precursor.	1	HRQDWVDSGCPEEVQSK+IALHLKDSGASTDDSAAEK+MLTATQYIAPLMANFDPSVSR+QDWVDSGCPEEVQSK	30.0511		5.97634				3.47837
IPI00229992	Plxnb1	PLXNB1	plexin-b1 precursor.	0.9	AIPEIYLTR+ASCDAGPMVASQQSPLLPLIPPAR+EAPDALPEFTVQMGNLR+EEVVAMIGDGPCVVK+ERAKAIPEIYLTR+FGAVVIASTSLSFYDCVAVTASSPSAPCR+LLTNWMSICLYTFVR+MQLGYRLQQIAAAVENKVTDL+MSVLGPVLLQVFWAGCVVTLR+TLLSDLVAQYVAK+VHSIFPARGPRAGGTR+VQIQLENLESSVR+YTSDPNVTSVGPSK
IPI00553425	Poli	POLI	isoform 1 of dna polymerase iota.	1	CSSEVEAK+EAMYNQLGLTGCAGVAPNK+EANWDCLPSR+ELMAEWER+RLVVGSQIAAEMR
IPI00136207	Polr2a	POLR2A	dna-directed rna polymerase ii largest subunit.	0.97	CVCFFCSKLLVDSNNPKIK+GFVENSYLAGLTPTEFFFHAMGGR+GVSENIMLGQLAPAGTGCFDLLLDAEK+IMNSDENK+KLVIVNGDDPLSR+LGGLMDPR+LLQFHVATMVDNELPGLPR+LTHVYDLCK+MDDDVFLR+RISDEECFVLGMEPR+THSTHPDDEDSGPYK+VIFPTGDSK+VVVENGELIMGILCKK+YIIRDNGDRIDLR						0.391609	0.909458	0.203154	YES
IPI00320034	Polr2b	POLR2B	dna-directed rna polymerase ii 140 kda polypeptide.	1	ELPAGINSIVAIASYTGYNQEDSVIMNR+GPIQILNR+IFVNGCWVGIHK+LDDDGLIAPGVR+LFEASDPYQVHVCNLCGIMAIANTR+RLDLAGPLLAFLFR+RQMDIIVSEVSMIR+TFIGKIPIMLRSTYCLLNGLTDR				3.67117					YES
IPI00410871	Polr3b	POLR3B	dna-directed rna polymerase iii subunit 127.6 kda polypeptide.	0.98	CIYTAVMVR+GAVGASVTSSTHEKK+HMEELAQGYR+LPAGQNATVAVMSYSGYDIEDALVLNK+MWGGGPKK+QGVTQVLSRLSYISALGMMTRISSQFEK+SLQPSQWGMLCPSDTPEGEACGLVK+SMPTVTQIPLEGSNVPQQPQYK+VMGPMLDAATR
IPI00317356	Pon1	PON1	serum paraoxonase/arylesterase 1.	1	EVTPVELPNCNLVK+GIETGAEDLEILPNGLTFFSTGLK+GIETGAEDLEILPNGLTFFSTGLKYPGIK+IFFYDAENPPGSEVLR+ILLMDLNK+IQNILSEDPK+ITVVYAENGTVLQGTTVASVYK+LLIGTVFHK+VLNFDTLVDNISVDPVTGDLWVGCHPNGMR				3.67117					YES
IPI00120870	Postn	POSTN	isoform 2 of periostin precursor.	1	DQGPNVCALQQILGTK+EGETVTEVIHGEPVIK+GFEPGVTNILK+IIDGVPVEITEK+IQIEGDPDFR+LILQNHILKVK+LLYPADIPVGNDQLLELLNK+QVIELAGK+VIHGNQIATNGVVHVIDR+VLTQIGTSIQDFLEAEDDLSSFR
IPI00313307	Pparbp	PPARBP	isoform 4 of peroxisome proliferator-activated receptor-bindingprotein.	0.98	AKSPISSGSSGSHVSGTSSSSGMKSSSGSASSGSVSQK+EGNGTGASSGSGPGSDSKPGK+GFASQALNTLGMPMLGGDNGEPKFK+GTVMVGKPSSHSQYTSSGSVSSSGSK+HESVGHGEDFSK+LASPMKPVPGTPPSSK+MEMCSGSNK+QNSSSGSPR+RKAETIQADTPALSLIAETVEDMVK+SLGMNASVTIEGTSAMYK+SQTPPGVATPPIPK+SSSGSASSGSVSQK+TSESKNVGSTGVAK
IPI00111210	Ppbp	#N/A	thymus chemokine 1.	1	SDGMDPYIELR+TCLDPNAPGVK
IPI00554989	Ppia	PPIA	peptidyl-prolyl cis-trans isomerase a.	1	EGMNIVEAMER+FEDENFILK+HTGPGILSMANAGPNTNGSQFFICTAK+IIPGFMCQGGDFTR+KITISDCGQL+TEWLDGK+VKEGMNIVEAMER+VSFELFADK+VSFELFADKVPK	0.540112	0.812245	0.924192	0.220062	1.99827	0.190816	0.77022	0.197589
IPI00130240	Ppic	PPIC	peptidyl-prolyl cis-trans isomerase c.	1	LLLPAVLCLGLGALVSSSGSSGVR+TPFVVEVPDW+TVENFVALATGEK
IPI00461286	Ppm1e	PPM1E	protein phosphatase 1e.	0.9	ATSDEVLQSDLSAHCIPK+ENNGDSSMVAHK+GNMLHVAWVGDSQVMLVRK
IPI00121554	Prap1	PRAP1	proline-rich acidic protein.	1	ALEPLEKDNQLGPLLPEPK+DNQLGPLLPEPK+QVLQGPEEDLDHLAHSMEDS	7.4558
IPI00121788	Prdx1	PRDX1	peroxiredoxin-1.	1	GLFIIDDK+LVQAFQFTDK+QGGLGPMNIPLISDPK+TIAQDYGVLK	0.304921	4.0804	0.848646	0.713466	0.621932	0.258626	0.539665	1.29811	YES
IPI00117910	Prdx2	PRDX2	peroxiredoxin-2.	1	EGGLGPLNIPLLADVTK+GLFIIDAK+KEGGLGPLNIPLLADVTK+KLGCEVLGVSVDSQFTHLAWINTPR+LGCEVLGVSVDSQFTHLAWINTPR+QITVNDLPVGR+SAPDFTATAVVDGAFK+SLSQNYGVLK	0.8638	4.07748	1.13263	0.339624	0.495237	0.450976		2.78814	YES
IPI00129517	Prdx5	PRDX5	isoform mitochondrial of peroxiredoxin-5, mitochondrial precursor.	0.92	ALNVEPDGTGLTCSLAPNILSQL+GVLFGVPGAFTPGCSK		0.326552	0.360437	0.477788	1.4716	0.0979023	0.389768	0.0870662	YES
IPI00555059	Prdx6	PRDX6	peroxiredoxin-6.	1	DFTPVCTTELGR+DINAYNGETPTEK+DLAILLGMLDPVEKDDNNMPVTAR+FHDFLGDSWGILFSHPR+KGESVMVVPTLSEEEAK+LIALSIDSVEDHLAWSK+LPFPIIDDK+LSILYPATTGR+MPGGLLLGDEAPNFEANTTIGR+NFDEILR+VVDSLQLTGTKPVATPVDWK+VVDSLQLTGTKPVATPVDWKK	0.364503		0.995352	2.25973	0.943797	0.21285	0.602508		YES
IPI00656272	Prg4	PRG4	isoform c of proteoglycan-4 precursor.	1	AVGPFQTHTFR+CCADYDSFCEEVK+CCADYDSFCEEVKDNK+CCADYDSFCEEVKDNKK+CFESFAR+DATCNCDYNCQHYMECCPDFK+DATCNCDYNCQHYMECCPDFKR+DQYYNIDVPTR+DRPESVYFFK+EPEPTTLKEPEPTTPK+EPEPTTPKEPEPTTPK+EPEPTTPKEPEPTTPKEPEPTTPK+EPEPTTPKEPEPTTPKEPEPTTR+EPEPTTPKEPEPTTR+FTNDVVDPGYPK+GFPNVVTSAITLPNIR+GGNIQQYTYK+GHYFWMLNPFRPPSPPR+IHYSVPMR+ITEVWGIPSPIDTVFTR+IVAALSIAK+IWYNCP+KPDGYDYYAFSK+LNQGININPMLSDETNLCNGKPVDGLTTLR+RITEVWGIPSPIDTVF…						23.7203	3.47837
IPI00123886	Prkdc	PRKDC	isoform 1 of dna-dependent protein kinase catalytic subunit.	0.86	AHAYMTLVGFCDQQLRK+AYVPALQMAFK+EISSIPCWQFIGWISHMMALLDK+ELEYCSTVNIVSENSLDLSK+EPKFPVLAGCLKGLSSLLCNFTK+ESQVPPDLLK+ETGLMCTVMVHALR+FVPLLPGNKSPSLWLKDLIK+KFLDALELSQSPMLFQLMTDILCREQR+LGLSHMPLAEIGLHALK+MICEPMSLGFNIGDVQVMNHLPSICVNLLKALRK+MIESAWKQSNFSLSMK+MYAALGDLRAPGLGPFR+QLYEPLVMQLIHWLTNNKK+RESQVPPDLLKR+SDAGAYVLMYSR+SDYCQAAKLYDEALNKLEWVDGEPTEAEK+VVQILGSLGGQINK	26.3232	34.4208		116.696		6.97804	5.45675	17.7542
IPI00120793	Prnp	PRNP	major prion protein precursor.	0.96	MANLGYWLLALFVTMWTDVGLCK+VVEQMCVTQYQK	4.2279		5.97634		48.7649	67.3988	13.3919	6.75141
IPI00113750	Proc	PROC	vitamin k-dependent protein c precursor.	1	CACAPGYELADDHMR+DHWELDLDIK+DTDLEDELEPDPR+GTWFLVGLVSWGEGCGHTNNYGIYTK+LGEYDLR+NVVSENMLCAGIIGDTR+QGDSPWQAILLDSK+SSSDNDIALLR+STVNFPCGK+TFILTFIR+TIVPICLPNNGLAQELTQAGQETVVTGWGYQSDR+VNNGGCLHYCLEESNGR+VNNGGCLHYCLEESNGRR+WIHSYIGEK
IPI00136972	Procr	PROCR	endothelial protein c receptor precursor.	1	TAVWVSGSQEPSK+TESGLQIYLTQFESLVK+YELQEFLQDTCVEFLENHITTQNMK							8.43512	6.75141
IPI00124374	Pros1	PROS1	vitamin k-dependent protein s precursor.	1	DCKDLDECALKPSVCGTAVCK+DLDECALKPSVCGTAVCK+HCFLNVEK+LEAVSLCSDQQSQLK+NIPGDFECECPDGYR+QSANAYPDLR+YLGCLGAFR	46.1906		20.9054	6.34234		3.52448	23.3054
IPI00133222	Proz	PROZ	vitamin k-dependent protein z precursor.	1	CACGALTSEHIR+GSVVMGPWVEGSVVTR+GTWFLTGILGSPPPPGQSQMLLLTAVPR+LTNSEGEDFCAGVLLQEDFVLTTAK+SSQSQPSFPWQVR+SYSCTCSPGYEGK+TDGCQHFCHPGQSSYMCSCAK+TDGCQHFCHPGQSSYMCSCAKGYK+YDEESGENDVSLLQLEEPLQCPSSGLPVCVPER+YSMWFK
IPI00319581	Prrx2	PRRX2	paired mesoderm homeobox protein 2.	0.89	EPSGGSSGTEAAPQDGDCPSPGR+MDSAAAAFALDPPAPGPGPPPAPGDCAQARK+NFSVSHLLDLEEVAAAGR
IPI00469952	Prx	PRX	isoform 1 of periaxin.	0.92	GAGEAGLLPALDLSIPQLSLDAQLPSGK+GEGVEPQGPEAQR+GSPEAKAKGPR+KMVTGALGTPADLAPVDVEFSFPK+LPEVQLPKVSEMKLPK+LPSVGFSETAVPGSTR+MAAAAPPPR+MPKLKMPSFGLSR+MPSFGLSR+VRLPSVGFSETAVPGSTRIEGTQAAAI
IPI00321190	Psap	PSAP	sulfated glycoprotein 1 precursor.	1	CVWGPSYWCQNMETAAR+EICVLAGFCNEVK+EICVLAGFCNEVKR+EVVDSYLPVILDMIK+GCSFLPDPYQK+GEMSNPGEVCSALNLCQSLQEYLAEQNQK+GLSNACALLPDPAR+HCQQMVWSKPTAK+IGVCPSAYK+IPEVDMAR+LGPGVSDICK+LVSDVQTAVK+NILPALEMMDPYEQNLVQAHNVILCQTCQFVMNK+QLESNKIPEVDMAR+QSALPAHVPPQK+TAVDCGAVK+TCEWIHDSSLSASCK+TCSGGSAVLCR+TLVPATETIK+TVVTEAGNLLK+VVAPFMSNIPLLLYPQDHPR	1.67267		7.71811	0.67406	4.64638		0.45584	0.735056	YES
IPI00283862	Psma1	PSMA1	proteasome subunit alpha type 1.	1	AQPSQAAEEPAEKADEPMEH+DLEFTIYDDDDVSPFLDGLEERPQR+ETLPAEQDLTTK+FVFDRPLPVSR+HMSEFMECNLDELVK+IHQIEYAMEAVK+ILHVDNHIGISIAGLTADAR+KILHVDNHIGISIAGLTADAR+LLCNFMR+NQYDNDVTVWSPQGR+NVSIGIVGK	0.617194	0.20162	0.804052		0.216035				YES
IPI00420745	Psma2	PSMA2	in vitro fertilized eggs cdna, riken full-length enriched library,clone:7420458h06 product:proteasome (prosome, macropain) subunit,alpha type 2, full insert sequence.	1	ESFEGQMTEDNIEVGICNEAGFR+GYSFSLTTFSPSGK+HIGLVYSGMGPDYR+KLAQQYYLVYQEPIPTAQLVQR+LVQIEYALAAVAGGAPSVGIK+YNEDLELEDAIHTAILTLK	0.439474	0.315562	1.23567	0.587138	0.880597	0.195805	1.11599		YES
IPI00277001	Psma4	PSMA4	proteasome subunit alpha type 4.	1	HYGFQLYQSDPSGNYGGWK+LLDEVFFSEK+YLLQYQEPIPCEQLVTALCDIK	0.745039	0.481915	1.7064		0.561692		1.67398	0.304732
IPI00131407	Psma5	PSMA5	proteasome subunit alpha type 5.	1	EELEEVIKDI+GPQLFHMDPSGTFVQCDAR+ITSPLMEPSSIEK+LFQVEYAIEAIK+LGSTAIGIQTSEGVCLAVEKR+LNATNIELATVQPGQNFHMFTK	0.837602	1.55009	1.3082	0.257529			2.56928	0.221623	YES
IPI00131845	Psma6	PSMA6	proteasome subunit alpha type 6.	1	AINQGGLTSVAVR+HITIFSPEGR+ILTEAEIDAHLVALAERD+ITESIGCVMTGMTADSR+LYQVEYAFK+YGYEIPVDMLCK	0.366095	0.175091	1.6081	0.282398		0.232652	1.43243	0.53484	YES
IPI00131406	Psma7	PSMA7	proteasome subunit alpha type 7.	1	AITVFSPDGHLFQVEYAQEAVK+AITVFSPDGHLFQVEYAQEAVKK+ALLEVVQSGGK+GKDIVVLGVEK+ICALDDNVCMAFAGLTADAR+ILNPEEIEK+KICALDDNVCMAFAGLTADAR+LTVEDPVTVEYITR+LYQTDPSGTYHAWK+NYTDDAIETDDLTIK+RPFGISALIVGFDFDGTPR	0.853308	0.750444	2.30743	0.409705	0.421269	0.302448	0.937235		YES
IPI00316736	Psmb10	PSMB10	proteasome subunit beta type 10 precursor.	1	ALSTPTEPVQR+LPFTALGSGQGAAVALLEDR				0.576576			2.26718	0.348265	YES
IPI00129512	Psmb4	PSMB4	proteasome subunit beta type 4 precursor.	0.98	FDGGVVIAADMLGSYGSLAR+QVLGQMVIDEELLGDGHSYSPR+TQNPMVTGTSVLGVK	1.019	0.407135	0.663709	0.820758			11.6005
IPI00119239	Psmb6	PSMB6	proteasome subunit beta type 6 precursor.	0.95	LAAIQESGVER	0.508748					1.04788			YES
IPI00136483	Psmb7	PSMB7	proteasome subunit beta type 7 precursor.	1	ATEGMVVADK+DGIVLGADTR+FRPDMEEEEAK+KLVSEAIAAGIFNDLGSGSNIDLCVISK+VTPLEIEVLEETVQTMDTS	0.176162
IPI00116712	Psmb8	PSMB8	proteasome subunit beta type 8 precursor.	0.96	GMGLSMGSMICGWDKK+LSGQMFSTGSGNTYAYGVMDSGYR+QDLSPEEAYDLGR+SDPGHYSFSAQAPELALPR+VESSDVSDLLYK							0.839499
IPI00135640	Psmc5	PSMC5	26s protease regulatory subunit 8.	0.99	NDSYTLHK+TMLELLNQLDGFEATK+VPDSTYEMIGGLDK						0.232652	0.49691
IPI00113287	Psmd9	PSMD9	10 days embryo whole body cdna, riken full-length enriched library,clone:2610305b01 product:proteasome (prosome, macropain) 26s subunit,non-atpase, 9, full insert sequence.	0.92	AAAVSDIQDLMR+ADVDLYQVR+AESSEARAAAVSDIQDLMRR	4.15987		3.9816		1.44098		0.744593
IPI00131763	Psp	C20orf70	parotid secretory protein precursor.	1	ILNPPSEAVPQNLNLDVELLQQATSWPLAK+ISISLLGR+NSILETLNTADLGNLK+TNAQTGLPEVTIGK
IPI00114252	Ptgds	PTGDS	prostaglandin-h2 d-isomerase precursor.	0.84	AQGLTEEDIVFLPQPDK+AVLYMCK	7.4558		25.8817				28.2621
IPI00127989	Ptges3	PTGES3	prostaglandin e synthase 3.	1	LNWLSVDFNNWK+LTFSCLGGSDNFK+SILCCLR	2.78673	0.455812	1.43337	0.253694	1.13881	0.971681	1.07933
IPI00750472	Ptpn13	PTPN13	tyrosine-protein phosphatase non-receptor type 13.	0.97	ANGLTSMEPSGQPALMPK+AQQPGLPQP+ASFRSLNLQAESVR+ASWEEKPRGMSK+ERDPAGPQSPPPDQDAQRQAPEK+ESAGLTETK+ETSQPSSSVEQGASSDDNGVSGKTKNHCR+FFMDDVSLIQHDLTCHQYYLQLRK+SPERRNHESDSSTEDPGQAYVVGMSLPSSGK+VNDTDVTNMTHTDAVNLLR+VPLGDEGGYINASFIR
IPI00110264	Ptprf	PTPRF	protein tyrosine phosphatase, receptor type, f.	1	EQFGQDGPITVHCSAGVGR+GFYNRPLSPDLSYQCFVLASLK+KLIADLQPNTEYSFVLMNR+TQQGVPAQPADFQANAESDTR+WFYIVVVPIDRVGGNLLAPR	2.48527		2.37369	6.85758	45.5522	64.112	38.1756	98.774
IPI00114671	Ptprg	PTPRG	receptor-type tyrosine-protein phosphatase gamma precursor.	1	ATISHVSPDSLYLFR+DAWNHDLADFLDNPLGTEASK+DLLPASLGSYYR+DNSALDPIIHGLK+ETAVSSSQLHSYVNSILIPGVGGK+ETFLDPFILR+EVPSSGER+IIGAMAIFFQVSPR+NNFRPQQALNDR+NTSGMLSRPSPGR+RFPVEMQIFFYNPDDFDSFQTAISENR+YTGSLTTPPCSEIVEWIVFR	10.6837					3.52448
IPI00624663	Pzp	PZP	alpha-2-macroglobulin precursor.	1	AAPLSLCALTAVDQSVLLLKPEAK+AESPVFVQTDKPIYKPGQIVK+AFAQAQSHIFIEK+AINYLISGYQR+ALLAYAFALAGNK+ALSFYQPR+AMGVPMMGLDYSDEINQVVEVR+APFALQVNTLPLNFDK+APFALQVNTLPLNFDKAGDHR+APSAEVEMTAYVLLAYLTSESSRPTR+ATVLNYMSHCIQIR+DAVKEEDSLHWQRPGDVQK+DHENCISGEDITHNGIVYTPK+DLSSSDLSTASK+DLTFYYLIK+DSFYCSPFTISGSPLPYTFITVEIK+DSFYCSPFTISGSPLPYTFITVEIKGPTQR+EEDSLHWQRPGDVQK+EEGTGIELTGIGSCEIANALSK+ENGCFQQSGYLLNNAMK+EQTYNTLLCPQDTELQDNWS…	17.1395	17.9604	45.787	110.518	67.8284	56.5386			YES
IPI00223231	Qscn6	QSCN6	isoform 1 of sulfhydryl oxidase 1 precursor.	1	AALDSRKEDAVLTEK+ADYLALVFER+ADYLALVFEREDSYLGR+AHFSPANIVIDSSASR+DCADHFEQMAAASMHQVR+DTWPPACPPLEPAK+DWRPALNLAVLDCAEETNSAVCR+EFNIAGFPTVR+ELCSACHNELNGQVPLWDLGATLNFLK+EVTLDLSQYHAVAVR+EVTLDLSQYHAVAVRR+FFQAFTK+FGVTDFPSCYLLLR+FSVLEGQR+GFPCSLWVLFHFLTVQANR+GSPEATPELVMDTLK+IPYSFFK+IYMADLESALHYILR+LIDALESHR+LNDIDGFFTR+LSGALSEDPHFPK+NGSGATLPGAGANVQTLR+NKADYLALVFER+NKADYLALVFEREDSYLGR+RVLNTESDLVNK+SFYTSYLR+SPSNA…
IPI00469211	Qscn6	QSCN6	isoform 3 of sulfhydryl oxidase 1 precursor.	1	AALDSRKEDAVLTEK+ADYLALVFER+ADYLALVFEREDSYLGR+AHFSPANIVIDSSASR+DCADHFEQMAAASMHQVR+DTWPPACPPLEPAK+DWRPALNLAVLDCAEETNSAVCR+EFNIAGFPTVR+ELCSACHNELNGQVPLWDLGATLNFLK+EVTLDLSQYHAVAVR+EVTLDLSQYHAVAVRR+FFQAFTK+FGVTDFPSCYLLLR+FSVLEGQR+GFPCSLWVLFHFLTVQANR+GSPEATPELLL+IPYSFFK+IYMADLESALHYILR+LIDALESHR+LNDIDGFFTR+LSGALSEDPHFPK+NGSGATLPGAGANVQTLR+NKADYLALVFER+NKADYLALVFEREDSYLGR+RGSPEATPELLL+RVLNTESDLVNK+SFYTS…
IPI00110865	Rab43	RAB43	13 days embryo liver cdna, riken full-length enriched library,clone:2500004h21 product:similar to rab19-like (fragment).	0.88	ESCGGPGGALPGGR+ESCGGPGGALPGGRSPR+GSGAEVCGADGDGR+RLLGASGQHHR+SPRGSGAEVCGADGDGR				6.34234
IPI00307988	Rad23a	RAD23A	uv excision repair protein rad23 homolog a.	1	ALGFPESLVIQAYFACEK+DQPQFQNMR+EDKSPSEESTTTTSPESISGSVPSSGSSGR+EEDAASTLVTGSEYETMLTEIMSMGYER+EKIEAEKGR+GRDAFPVAGQK+NENLAANFLLSQNFDDE+NFVVVMVTK+QVIQQNPALLPALLQQLGQENPQLLQQISR+SPSEESTTTTSPESISGSVPSSGSSGR	0.74558		0.398423				0.579729
IPI00113022	Raet1e	RAET1E	retinoic acid early inducible protein 1 epsilon precursor.	0.89	SANDESGVIMNK
IPI00321978	Ranbp1	RANBP1	ran-specific gtpase-activating protein (fragment).	1	AWVWNTHADFADECPKPELLAIR+FASENDLPEWK+ICANHYITPMMELKPNAGSDR+TLEEDEEELFK	2.33734	1.05649	2.54372	0.203954	7.53648		1.19135
IPI00337844	Ranbp2	RANBP2	e3 sumo-protein ligase ranbp2.	1	ALGTNTSTAPNHTLR+CKFEEAQNILKALGTNTSTAPNHTLR+CVACENPGK+CVSCQNTNPTSNK+DICKADGGNLNFEFQIVKK+DSLITPHVSHLSTPR+EDALDDSVSSSSVHASPLASSPVR+EGEWECAVCSVQNESSSLK+EMTESFKK+EQVLKICANHYISPDMK+GEAGQNLLETMAHDR+HTGPGLLSMANYGQNTNSSQFFITLK+ILMRRDQVFK+KVLPLLK+NFQWANTGAAVFGTQTTSK+NSNSEMTSR+QKTWWDAVCTLIHRK+VAEKANTSSDLEK+VVPDFICQGGDITK+YNGTGGQSIYGDK	4.2279				1.05317	0.75612	1.55907	0.553672	YES
IPI00122863	Rarg	RARG	retinoic acid receptor gamma-b.	0.84	LYGAAGPGAGLLR+MEIPGPMPPLIR+RLYGAAGPGAGLLR
IPI00461937	Rarres2	RARRES2	retinoic acid receptor responder protein 2 precursor.	1	AEEVLFSAGTFVR+HPPVQLAFQEIGVDR+KPECTIKPNGR+QGPQDPQELQCIK+SLQVALEEFHK	23.5953		145.314	9.01351			13.3919
IPI00130555	Rasal1	RASAL1	rasgap-activating-like protein 1.	0.95	DLAPRDISGTSDPFAR+EAPGTTSPLR+KYMELDPCKMDLNR+LFDLRDQHADPQTSR+LKVRLTEDR+VDPDAEVQGEVCLDVK
IPI00719915	Raver1	RAVER1	isoform 1 of ribonucleoprotein ptb-binding 1.	0.81	EPMGLGPPATQLTPPPAPVGLR+EPTLGAHGPSR+GFAVLEYETAEMAEAAQER+GKPQPLLPPLLGPSGGDR+GRRPAEPPLPSPAVPGGGSGSNNGNK+RPAEPPLPSPAVPGGGSGSNNGNK+SFSHLLPSPEPSPEGSYVGQHSQGLGGHYADSYLKR+SGGGSGGPLSHFYSGSPTSYFTSGLQAGLK+VSFCAPGPPGR	0.352325					0.391609
IPI00749698	Rbm16	RBM16	rna binding motif protein 16 isoform 1.	0.97	GSTASAILDAAAAAVSASSCVFAAR+QIXMIPXTFSNRIWILMK+TLGFPLLMLGFLIISK+TPGHNGGDEAALIR+TWSSCDSSSWSSSSLRR+YLDYMLLTPLCDNPGISLVKK								3.37571
IPI00122429	Rbp4	RBP4	plasma retinol-binding protein precursor.	1	DPNGLSPETR+FSGLWYAIAK+GNDDHWIIDTDYDTFALQYSCR+KDPEGLFLQDNIIAEFSVDEK+LLSNWEVCADMVGTFTDTEDPAK+LLSNWEVCADMVGTFTDTEDPAKFK+LQNLDGTCADSYSFVFSR+MKYWGVASFLQR+QEELCLER+QRQEELCLER+WIEHNGYCQSRPSR+YWGVASFLQR	39.7348		40.8107
IPI00153710	Rcsd1	RCSD1	rcsd domain containing 1 isoform a.	1	AVSMDDIPIEDTR+EETTPGEHTDTGKATEGTASEER+MEERPSETNSNVDSSAQPSVAQLAGR+QKEEAPLEPSCSPGADHAAGEITSEIQNEK+SPDANMPEEEGVVR							2.1827
IPI00113806	Reg3g		regenerating islet-derived protein 3 gamma precursor.	1	AYGSYCYALFSVSK+ENYCNLELPYVCK+GGWEWSNADVMNYINWETNPSSSSGNHCGTLSR+NWYDADMACQK+RPSGHLVSVLSGAEASFLSSMIK+SSGNSGQYVWIGLHDPTLGYEPNR
IPI00121421	Reln	RELN	isoform 1 of reelin precursor.	0.83	EGCFPASAAK+ELTTTCLNTTTASVLQFSIGSGSCR+GFGGPFCVPVVPLPSILK+ITGGQVGTGCGTLNDGR+LSTVCGAVASGLALHFSGGCSR+MKGVLLR+QAATKPLDLTR+QQTWAIDNVYIGDGCLDMCSGHGR
IPI00120465	Retn	RETN	resistin precursor.	1	IKQDFNSLFPNAIK+LASCPEGTAVLSCSCGSACGSWDIR+NIGLNCWTVSSR
IPI00109324	Retnla		resistin like alpha.	0.96	ELLANPANYPSTVTK+TTTCSLLICISLLQLMVPVNTDETIEIIVENK
IPI00408687	Retnlg		myeloid cysteine-rich protein.	1	DGNTCHCQCSTMDWATAR+ELLANRDDCPSTVTK+LASCPSGMTVTGCACGYGCGSWDIR+TFSCTSITASGR
IPI00345558	Rgag1	RGAG1	isoform 1 of retrotransposon gag domain-containing protein 1.	1	APASGAGSTPLMR+CSVSGMMSTQPVIATASEIMSVSQSTVPTSGSVSTQKTR+DSSGNSNQVVPTSCKR+FTAPGSKSTPHMTSTAPEMKTPPPK+LSGPGATSTPLMR+MPSQAMNIQDSGGVSTPLMRPVALGGVQMR+SPASSTLSTLLR+SRPQMATACGDMCPLPVR+TPVYGTISAPHMTTTASGVMTMSPMK+VPASGNMSTSQK						3.52448
IPI00453947	Rgma	RGMA	isoform 1 of repulsive guidance molecule a precursor.	1	CNSEFWSATSSGSHAPASDDVPEFCAALR
IPI00387510	Rgmb	RGMB	rgm domain family member b precursor.	0.94	CTTDFVALTAHLNSAADGFDSEFCK	4.2279				30.7015	11.0979
IPI00130372	Rmnd5b	RMND5B	rmd5 homolog b.	0.98	DACSLLGLSVESPLSVSFASGCVALPVLMNIK+KIRDTVQK
IPI00133541	Rnase1	RNASE1	ribonuclease pancreatic precursor.	1	HIIVACEGNPYVPVHFDATV+QHMDPDGSSINSPTYCNQMMK+QHMDPDGSSINSPTYCNQMMKR+SSSALHITDCHLK			125.408				28.2621
IPI00121837	Rnase4	RNASE4	ribonuclease 4 precursor.	1	FNTFIHEDIWNIR+GICSTTNILCK+QHVDPQATGGNDNYCNVMMQR+RFNTFIHEDIWNIR+RVVIACEGDPEVPVHFDR+VVIACEGDPEVPVHFDR			15.929			8.57344
IPI00416043	Rnase4	RNASE4	rnase4 protein.	1	FNTFIHEDIWNIR+GICSTTNILCK+QHVDPQATSGNDNYCNVMMQR+RFNTFIHEDIWNIR+RVVIACEGDPEVPVHFDR+VVIACEGDPEVPVHFDR			15.929			8.57344
IPI00319441	Rnf32	RNF32	ring finger protein 32.	0.86	KSTEGPNMEDPEK+QAAIGTSSQRPR
IPI00229529	Rp1l1	RP1L1	retinitis pigmentosa 1-like 1 protein.	1	CPQDMPVPPGSLVAADDVEK+CPQDMPVPPGSLVAADDVEKK+CQAHSSTPTPAHR+ESASNGSTSSGHSR+GELGCLWDK+HQDVKEDSPWVSSGESQGRVGSENTSLDQEGR+LPKQGKGEDEGSAGSLACTQVGGK+LQASTVMEVRK+MVPEPPR
IPI00377618	Rpap1	RPAP1	isoform 1 of rna polymerase ii associated protein 1.	0.99	ALGLPLTQLPVPLECYTEPAEDSLPLLQLYFR+ASDTPSGPPAADTVGVAMR+DVVMLDNLPDLPPALLPAPAK+FQSQFLEAGAAPAVQLVKGSRR+KTPEEGSRPPPDLAR+LEFLPESASGGPEAADFSDGLSLGSSGDPQCR+LEFLPESASGGPEAADFSDGLSLGSSGDPQCRR+LWAVAASYGQGGDLYR+QQCLQTLPTEGLQNGGVK+VTSAEQVVPSLDTPEGAVPCETPSFR						3.52448
IPI00137736	Rps28	RPS28	40s ribosomal protein s28.	0.92	EGDVLTLLESER	0.74558		1.82545	0.611862		0.125874		1.21893
IPI00134599	Rps3	RPS3	40s ribosomal protein s3.	1	DEILPTTPISEQK+FIMESGAKGCEVVVSGKLR+GGKPEPPAMPQPVPTA+IMLPWDPSGKIGPK+KPLPDHVSIVEPK	0.363005	0.798171		5.46471	0.168625	0.386625	0.458715	0.636088	YES
IPI00331603	Rps6kl1	RPS6KL1	isoform 1 of ribosomal protein s6 kinase-like 1.	0.9	MSLVACECPPGPGLEPEPCSR+TLGSGASPNTGFSSLR
IPI00122845	Rsf1	RSF1	hepatitis b virus x associated protein.	0.82	ADGEDGVEGEPASLQTADK+EDSASIPAKDGNACMEGNGTECLNSVITSTKTSELEK+MYIEEQDDQDGSSWK+QINYKEDSESDGSQK+TEQMEIQLCDTK+VGSPLDYSLVDLPSTNGQSPGK+YLIKICQEFNSTWAWEMEK	0.5623						0.850964
IPI00274165	Rtel1	RTEL1	deah helicase isoform 6.	0.86	AGASEEQALGSSTPSLR+GRSGVGGQCLSGQEWYQQQASRAVNQAIGR+HDYGAIFLCDHRFAYADARAQLPSWVRPYLK+KVEALKPLFVEPR+MQFLDEMR+QESNHMQISLCR+QESNHMQISLCRK+TLSSWGSAAAASGDSIECYTDIPK+VLSYWCFSPSQSMR
IPI00221590	Rxfp3	RXFP3	relaxin-3 receptor 1.	0.87	RVVGTTDAVGAAAAPGGGLSTASAR+RVVGTTDAVGAAAAPGGGLSTASARR+VVGTTDAVGAAAAPGGGLSTASAR
IPI00622912	Ryr1	RYR1	ryanodine receptor 1, skeletal muscle.	0.84	AGYYDLLISIHLESACR+ALGMHETVMEVMVNVLGGGESK+EAATAVAALLWALVTRAGGAGAGAAAGALR+EGTPGGTAQAGVEAQPAR+LHPCLVNFHSLPEPER+MDGTVDTPPCLR+NGADEEECPLPEEIR+RSAGGWGEAEGGK+RSAGGWGEAEGGKDGTAK+SLLIVQMGPQEENLMIQSIGNIMNNK+TPPPPPPKK+VLDVLCSLCVCNGVAVR+VSDSPPGEDDIEGSGAGDMSGAGSGDGSGWGSR+WMDISQEFIAHLEAVVSSGR+WQMALYR							5.95675
IPI00606638	Ryr3	RYR3	ryanodine receptor 3.	0.94	AEAASLVSWLSSIDMK+AQAAEMKAVHEAEGK+ASASLDTVSLSTTEAALALNR+EKTFEEKEMEK+GAAEMVLQMISASK+KMLPIGLNMCTPGDQELISLAK+KYDLDLFR+LAENIHELWGMNK+LINDVTSIRPNIFLGVAEGSPQYKK+LNIYNSVAHFAGIVR+QGPEVGLGDLSEIIGK+QHPCLVEFSKLPETEK+QMVDTLVESSTNVEMILK+RSNCYMVWGGDIVASSQR+TLLALGCHIAHVNPAAEEDLKK
IPI00119202	S100a11	S100A11	protein s100-a11.	1	CIESLIAVFQK+TEFLSFMNTELAAFTK	0.662247		0.7853	0.156211	2.19296		0.051916	0.250991
IPI00230768	S100a8	S100A8	protein s100-a8.	1	ALSNLIDVYHNYSNIQGNHHALYK+KMVTTECPQFVQNINIENLFR+MVTTECPQFVQNINIENLFR		1.66336					0.388423	0.328202	YES
IPI00222556	S100a9	S100A9	protein s100-a9.	1	QMVEAQLATFMK+QMVEAQLATFMKK+SITTIIDTFHQYSR				9.01351			0.567839	0.304178
IPI00118455	Saa1	SAA1	serum amyloid a-1 protein precursor.	1	DPNYYRPPGLPDK+DPNYYRPPGLPDKY+EAFQEFFGR+GHEDTIADQEANR+GPGGVWAAEK+ISDGREAFQEFFGR+NSDKYFHAR+SGKDPNYYRPPGLPDK+SGKDPNYYRPPGLPDKY			5.97634				5.95675
IPI00118457	Saa2		serum amyloid a-2 protein precursor.	1	DPNYYRPPGLPAK+DPNYYRPPGLPAKY+ESFQEFFGR+GHEDTMADQEANR+GPGGVWAAEK+SGKDPNYYRPPGLPAK+SGKDPNYYRPPGLPAKY
IPI00135547	Saa4	SAA4	serum amyloid a-4 protein precursor.	1	AYRDNLEANYQNADQYFYAR+DNLEANYQNADQYFYAR+EAVQGTWDLWR+KYFQGLLNR+NHGLETLQATQK+NHGLETLQATQKAEEWGR+NPNHFRPEGLPEKF+SGKNPNHFRPEGLPEKF+YFQGLLNR+YYFGIR						84.3079
IPI00755557	Sbf1	SBF1	set binding factor 1.	0.99	AGESQLQETIESLCAWLPCHXAQPSLFSALTGGLR+CSPEQAPCGMAMLXQPSSSPAXCHLTSAGGAAALGDR+EASVVIGHGGVGATR+GDTVCIQLCSGAR+GRPECEPRECDREPAHMYRPIGWR+HCPDAHXDPGGR+HCVQPGHPLCQPHELPSAASGQQQEPAAAGAGR+LPLVPAHR+LQLLCPGCALSPAVGGPDPELPVGCL+QDQAPAAILXPPNGHR+TSSCQGXAEEHCAFR+WPSSVSAAR
IPI00319814	Sbsn	SBSN	suprabasal-specific protein suprabasin.	1	ALEGINNGITQAGR+IFGELSNMGSQAGK	68.7859		5.97634			112.077
IPI00133418	Scg2	SCG2	secretogranin-2 precursor.	1	EHLGPGSSQEMER+MLVKYPELLNTNQLKR+RVPSPVSSEDDLQEEEQLEQAIK+TNEIVEEQYTPQSLATLESVFQELGK+VAWIPDVESR+VLEYLNQEQAEQGR
IPI00112446	Scg3	SCG3	secretogranin-3 precursor.	1	DFINQQADAYVEK+EANNYEETLDKPTSR+ELSAERPLNEQIAEAEADK+FQDDPDGLHQLDGTPLTAEDIVHK+GILDKEEANAIK+KAFPSESKPSESNYSSVDNLNLLR+LLNLGLITESQAHTLEDEVAEALQK+SPPFDNQLNVEDADSTK+VTPVAAVQDGFTNR+YGTISPEEGVSYLENLDETIALQTK
IPI00113547	Scgb1a1	SCGB1A1	uteroglobin precursor.	1	ILTSPLCK+LVDTLPQETR+RLVDTLPQETR
IPI00624932	Scn5a	SCN5A	cdna, riken full-length enriched library, clone:m5c1060a22product:sodium channel, voltage-gated, type v, alpha polypeptide, fullinsert sequence.	0.99	EGLIAYMMNENFSRR+GVDTVSRSSLEMSPLAPVTNHER+IVEHSWFETFIIFMILLSSGALAFEDIYLEERK+KHEEVSATVIQR+KPAALATHSQLPSCIAAPR+LADVMVLTVFCLSVFALIGLQLFMGNLRHK+QQESQVVSGGHEPPQEPR+RLSSGTEDGGDDR
IPI00356287	Scn9a	SCN9A	sodium channel protein type 9 subunit alpha.	1	KDDEEEGPKPSSDLEAGK+KSFHLGVEGHHR+KTFIVLNK+MAMLPPPGPQSFVHFTKQSLALIEQRISEEK+QLPFIYGDIPPGMVSEPLEDLDPYYADK+VLGESGEMDSLR
IPI00172349	Scotin	SCOTIN	scotin gene.	1	IQWNEEMCPEPESSR+KIQWNEEMCPEPESSR	13.9116				30.7015
IPI00318993	Sell	SELL	l-selectin precursor.	1	AALCYTASCQPGSCNGR+EDCVEIYIK+EIEYLENTLPK+KAALCYTASCQPGSCNGR+SKEDCVEIYIK+SPYYYWIGIR+SPYYYWIGIRK						3.52448	3.47837
IPI00816983	Sema5a	SEMA5A	semaphorin 5a.	1	CQRAEHPVVSYK+CSATCGGGHYMR+CTAQCGGGIQAR+FSHLAVDVVQGR+KCTSLEESLSMTQWDQSIPTCPTR+TCENGPDCAGCNVEYQPCNTNACPELK+TCENGPDCAGCNVEYQPCNTNACPELKK+TYSNAYFTDLNNYDEY+YCSSDGTSGCSTDGLSGDFLR
IPI00137599	Sepp1	SEPP1	selenoprotein p precursor.	1	APEWYIGDQNPMLNSEGK+DDFLIYDR+ESEAAPSSCCCHCR+GCINQLLCK+KQVSEHIAVYR+LVYHLGLPYSFLTFPYVEEAIK+QEEDGIDVWTLLNGNK+QEEDGIDVWTLLNGNKDDFLIYDR+QVSEHIAVYR+RGCINQLLCK+TAEPSEAHSHHK
IPI00123219	Sept4	SEPT4	isoform a of septin-4.	0.93	ESIPFAVIGSNTVVEAR+ESIPFAVIGSNTVVEARGR+HAVDIEEK
IPI00471475	Serbp1	SERBP1	isoform 1 of plasminogen activator inhibitor 1 rna-binding protein.	0.93	EAGGGGVGGPGAK+EAGGGGVGGPGAKSAAQAAAQTNSNAAGK+FDQLFDDESDPFEVLK	6.62247	7.70461	1.06193	2.91591	0.767791	0.38036	0.539665	0.198571
IPI00153258	Serpina10	SERPINA10	isoform 1 of protein z-dependent protease inhibitor precursor.	1	DEEYWLR+DLGLSQGSFAFIHK+DLGLSQGSFAFIHKDFDIK+EEEEEEEEKEEGKDEEYWLR+EEGKDEEYWLR+EGNFTSTFDKK+GTEAVSGTLSEIIAYSMPPAIK+HDGNVIFSPFGLSVAMVNLMLGTK+KMEVFFPK+LFDEINPETK+LFDEINPETKLILVDYVLFK+LFSTSADLSELSAMAR+LILVDYVLFK+MEVFFPK+MLLFLGR+RLFSTSADLSELSAMAR+VLQQSVLEVDER+VNRPFHFIIYEEMSR+VQIENGLNLQALSQAGPLILPALFK+VQIENGLNLQALSQAGPLILPALFKK+WLTPFDPSFTEADTFHLDK+WLTPFDPSFTEADTFHLDKYR+YEMHELLK					8.42537	8.57344
IPI00406302	Serpina1a		alpha-1-antitrypsin 1-1 precursor.	1	AVLTIDETGTEAAAVTVLQMVPMSMPPILR+DQSPASHEIATNLGDFAISLYR+FLEEAKNHYQAEVFSVNFAESEEAK+FLEEAKNHYQAEVFSVNFAESEEAKK+IAEAVKKLDQDTVFALANYILFK+IFNNGADLSGITEENAPLK+IFNNGADLSGITEENAPLKLSQAVHK+KLDQDTVFALANYILFK+KLDQDTVFALANYILFKGK+KPFDPENTEEAEFHVDESTTVK+KVINDFVEK+KVINDFVEKGTQGK+LAQIHFPR+LSISGEYNLK+LSISGEYNLKTLMSPLGITR+LVEKFLEEAK+MQHLEQTLSK+MQHLEQTLSKELISK+NHYQAEVFSVNFAESEEAK+NHYQAEVFSVNFAESEEAKK+NHYQAEVFSVNFAES…
IPI00129755	Serpina1b	SERPINA1	alpha-1-antitrypsin 1-2 precursor.	1	AVLTIDETGTEAAAATVFEAVPMSMPPILR+DQSPASHEIATNLGDFAISLYR+ELDQDTVFALANYILFK+ELDQDTVFALANYILFKGK+FDHPFLFIIFEEHTQSPIFVGK+FDHPFLFIIFEEHTQSPLFVGK+FLEEAKNHYQAEVFSVNFAESEEAK+FLEEAKNHYQAEVFSVNFAESEEAKK+IFNNGADLSGITEENAPLK+IFNNGADLSGITEENAPLKLSK+IFNNGADLSGITEENAPLKLSKAVHK+IVEAVKELDQDTVFALANYILFK+IVEAVKELDQDTVFALANYILFKGK+KPFDPENTEEAEFHVDK+KVINDFVEK+KVINDFVEKGTQGK+LSISGDYNLK+LVEKFLEEAK+LVQIHIPR+MQHLEQTLNK+MQH…
IPI00475157	Serpina1b	SERPINA1	serpina1b protein.	1	AVLTIDETGTEAAAATVFEAVPMSMPPILR+DQSPASHEIATNLGDFAISLYR+ELDQDTVFALANYILFK+ELDQDTVFALANYILFKGK+EPFDPENTEEAEFHVDK+FDHPFLFIIFEEHTQSPIFVGK+FDHPFLFIIFEEHTQSPLFVGK+IFNNGADLSGITEENAPLK+IFNNGADLSGITEENAPLKLSK+IFNNGADLSGITEENAPLKLSKAVHK+IVEAVKELDQDTVFALANYILFK+IVEAVKELDQDTVFALANYILFKGK+KVINDFVEK+KVINDFVEKGTQGK+LSISGDYNLK+LVQIHIPR+MQHLEQTLSK+MQHLEQTLSKELISK+NHYQAEVFCVNFAESEEAKK+RLVQIHIPR+TLMSPLGITR+TLMSPLGIT…
IPI00123924	Serpina1d		alpha-1-antitrypsin 1-4 precursor.	1	AVLTIDETGTEAAAATVLQVATYSMPPIVR+DQSPASHEIATNLGDFALR+FDHPFLFIIFEEHTQSPIFVGK+FDHPFLFIIFEEHTQSPLFVGK+FLEEAKNHYQAEVFSVNFAESEEAK+FLEEAKNHYQAEVFSVNFAESEEAKK+IFNNGADLSGITEENAPLK+IFNNGADLSGITEENAPLKLSK+IFNNGADLSGITEENAPLKLSKAVHK+IVEAVKKLDQDTVFALANYILFK+KLDQDTVFALANYILFK+KLDQDTVFALANYILFKGK+KVINDFVEK+KVINDFVEKGTQGK+LSISGNYNLK+LVEKFLEEAK+MQHLEQTLNK+NHYQAEVFSVNFAESEEAK+NHYQAEVFSVNFAESEEAKK+NHYQAEVFSVNFAESEEA…
IPI00131830	Serpina3k		serine protease inhibitor a3k precursor.	1	ALYQTEAFTADFQQPTEAK+AVLDVAETGTEAAAATGVIGGIR+AVLDVAETGTEAAAATGVIGGIRK+DEELSCSVLELK+DLQILAEFHEK+ELISELDER+EVFTEQADLSGITETK+EVFTEQADLSGITETKK+FSIASNYR+FSIASNYRLEEDVLPEMGIK+HFRDEELSCSVLELK+ISFDPQDTFESEFYLDEK+ISFDPQDTFESEFYLDEKR+KLALKNPDTNIVFSPLSISAALALVSLGAK+KTLFPSQIEELNLPK+LEEDVLPEMGIK+LEEDVLPEMGIKEVFTEQADLSGITETK+LSVSQVVHK+MAFIVAMGMILMAGICPAVLCFPDGTK+MQQVEASLQPETLR+MQQVEASLQPETLRK+NLINDYVSNQTQGMIK+…
IPI00761224	Serpina3k		47 kda protein.	1	ALYQTEAFTADFQQPTEATK+AVLDVAETGTEAAAATGFIFGFR+DEELSCSVLELK+DILPELGIK+DLQILAEFHEK+DLSVSQVVHK+FSISTDYNLK+FSISTDYNLKDILPELGIK+GNTLEEILEGLK+HFRDEELSCSVLELK+IGELYLPK+ISFDPQDTFESEFYLDEK+ISFDPQDTFESEFYLDEKR+KIGELYLPK+KLISELDDR+LSQPEDQDQINIGNAMFIEK+MQQVEASLQPETLR+MQQVEASLQPETLRK+NPDKNIVFSPLSISAALALVSLGAK+NQESGTPDDSLTLASINTDFAFSLYK+QADLSGITGTK+TLMVLVNYIYFK+WKISFDPQDTFESEFYLDEKR
IPI00135635	Serpina3m		serine protease inhibitor a3m precursor.	1	ALYQTEAFTADFQKPTEAK+AVLDVAETGTEAAAATGFIFGFR+DEELSCSVLELK+DILPELGIK+DLQILAEFHEK+DLSVSQVVHK+FSISTDYNLK+FSISTDYNLKDILPELGIK+GNTLEEILEGLK+HFRDEELSCSVLELK+IGELYLPK+ISFDPQDTFESEFYLDEK+ISFDPQDTFESEFYLDEKR+KIGELYLPK+LSQPEDQDQINIGNAMFIEK+MQQVEASLQPETLR+MQQVEASLQPETLRK+NLINDYVSNQTQGMIK+NPDKNIVFSPLSISAALALVSLGAK+NQESGTPDDSLTLASINTDFAFSLYK+QADLSGITGTK+WKISFDPQDTFESEFYLDEKR
IPI00314141	Serpina3n	SERPINA3	serine protease inhibitor a3n precursor.	1	AVLDVAETGTEAAAATGVK+DEELSCTVVELK+DQVQISTGSALFIEK+DQVQISTGSALFIEKR+ELVLKNPDKNIVFSPLSISAALAVMSLGAK+EVFSTQADLSAITGTK+FSISTDYSLEDVLSK+GNTLEEILEGLK+KQTQGMIK+LINDYVR+MIDELHLPK+MQQVEASLQPETLR+MQQVEASLQPETLRK+NIVFSPLSISAALAVMSLGAK+NPDKNIVFSPLSISAALAVMSLGAK+QQILTEFQEK+RQQILTEFQEK+TLMVLVNYIYFK+TLYQAEAFTADFQQPR+VPFDPLDTFK+VPFDPLDTFKSEFYAGK+WKVPFDPLDTFK+WKVPFDPLDTFKSEFYAGK
IPI00116105	Serpina6	SERPINA6	corticosteroid-binding globulin precursor.	1	AGEQINNHVK+DLAPTNVDFAFNLYK+DLAPTNVDFAFNLYKR+DSFLADTK+DTPLTLTVLHK+FSMSDTYDLQDVLADVGIK+GSTQYLENLGFNMSK+HYYESEALTIPSK+HYYESEALTIPSKDWTK+IEHVVSDLDSSATLILINYIFLK+LKDSFLADTK+LPFSPENTR+LVALNSDKNTLISPVSISMALAMLSLSTR+NTLISPVSISMALAMLSLSTR+QMNLYIPK+RLVALNSDKNTLISPVSISMALAMLSLSTR+TQGKIEHVVSDLDSSATLILINYIFLK+YNRPFIFLAFDK+YNRPFIFLAFDKYTWSSLMMSQVMNPA+YTWSSLMMSQVMNPA									YES
IPI00468387	Serpina6	SERPINA6	22 kda protein.	0.97	AGEQINNHVK+DSFLADTK+FSMSDTYDLQDVLADVGIK+HYYESEALTIPSK+HYYESEALTIPSKDWTK+IEHVVSDLDSSATLILINYIFLK+LKDSFLADTK+QMNLYIPK+TQGKIEHVVSDLDSSATLILINYIFLK+YNRPFIFLAF									YES
IPI00136642	Serpinc1	SERPINC1	antithrombin-iii precursor.	1	AFLEVNEEGSEAAASTSVVITGR+ANRPFLVLIR+ANRPFLVLIREVALNTIIFMGR+ATEEDGSEQKVPEATNR+ATEEDGSEQKVPEATNRR+DDLYVSDAFHK+DIPVNPLCIYR+ENPEQSR+EPFYKVDGQSCPVPMMYQEGK+EQLQDMGLIDLFSPEK+EVALNTIIFMGR+FATNFYQHLADSK+FATNFYQHLADSKNDNDNIFLSPLSISTAFAMTK+FRTEDGFSLK+FRTEDGFSLKEQLQDMGLIDLFSPEK+GDDITMVLILPKPEK+IKDVIPQGAINELTALVLVNTIYFK+KATEEDGSEQKVPEATNR+KEPFYKVDGQSCPVPMMYQEGK+KLCLLSLLLIGALGCAICHGNPVDDICIAKPR+LQPLDFK+LQPLDFKE…	10.6837					23.7203	1.31061		YES
IPI00113227	Serpind1	SERPIND1	heparin cofactor 2 precursor.	1	FAFNLYR+GETHEEVHSVLHFR+IAIDLFK+NYNLVEVLK+SMGITKLFNKNGNMSGISDQR+TLEAQLTPQVVER+VSMMQTK+YEVTTIHNLFR	10.6837
IPI00115065	Serpine2	SERPINE2	glia-derived nexin precursor.	0.99	GMIDNLLSPNLIDGALTR+SRPHENVVVSPHGIASILGMLQLGADGKTKK+SYQVPMLAQLSVFR
IPI00331088	Serpinf1	SERPINF1	pigment epithelium-derived factor precursor.	1	AAFEWNEEGAGSSPSPGLQPVR+ALYYDLITNPDIHSTYK+ALYYDLITNPDIHSTYKELLASVTAPEK+DTDTGALLFIGR+ELLASVTAPEK+KTTLQDFHLDEDR+LAAAVSNFGYDLYR+LQSLFESPDFSK+LSFEGELTK+LTFPLDYHLNQPFLFVLR+SSASPTGNVLLSPLSVATALSALSLGAEHR+SSFVAPLEK+TIQAVLTVPK+TTLQDFHLDEDR+VDLQEINNWVQAQMK+YGLDSDLNCK	7.4558		10.9527	6.34234	8.42537	11.0979
IPI00118924	Serpinf2	SERPINF2	alpha-2-antiplasmin precursor.	1	DFFHLDER+FDPSLTQK+FTVSVDMMHAVSYPLR+GFPIKDDFLEQSER+GISEQNLVVSSVQHQSTMELSEAGVEAAAATSVAMNR+LDNQDFGDHATLK+LDNQDFGDHATLKR+LHLQQQLDLVATLSQLGLQELFQGPDLR+LPLPALFK+LTGKQEEDLANINQWVK+MEEDYPQFSSPK+MSLSSFTVNRPFLFFIMEDTIGVPLFVGSVR+NPNPSALPQLQEQR+QEEDLANINQWVK+TKFDPSLTQK+VLHMNTGSCLPHLLSHFYQNLGPGTIR+WFLLEQPEIQVAHFPFK	13.9116	6.65346	15.929			21.1959	1.15946	1.77119
IPI00122977	Serping1	SERPING1	plasma protease c1 inhibitor precursor.	1	ALNPTVFK+DFACVHQALK+FLPTYLTMPHIK+FPVFMGR+GVTSVSQIFHSPDLAIR+HETVLELTESGVEAAAASAISFGR+KLLDSLPSDTR+KMMAPFFYK+LEFFDFTYDLNLCGLTEDPDLQVSAMK+LLDSLPSDTR+LSEALTDFSVK+LVLLNAVYLSAK+MMAPFFYK+SLPIFEVQRPFLFLLWDQQHR+SNLESILSYPK+SNLESILSYPKDFACVHQALK+SSQDMLSVMEK+VKSSQDMLSVMEK+VLGPDSAANLELINTWVAENTNHK+VPMMSSVKYPVAQFDDHTLK+YPVAQFDDHTLK	7.4558		60.7161	17.027	8.42537	26.2448	11.8991	3.68833
IPI00750580	Serping1	SERPING1	serine (or cysteine) proteinase inhibitor, clade g, member 1.	1	DFACVHQALK+GVTSVSQIFHSPDLAIR+KLLDSLPSDTCLVLLNAVYLSAK+KMMAPFFYK+LLDSLPSDTCLVLLNAVYLSAK+LSEALTDFSVK+MMAPFFYK+SNLESILSYPK+SNLESILSYPKDFACVHQALK+VLGPDSAANLELINTWVAENTNHK+VPMMSSVKYPVAQFDDHTLK+YPVAQFDDHTLK	7.4558		60.7161	17.027	8.42537	26.2448	11.8991	3.68833
IPI00118286	Sfn	SFN	14-3-3 protein sigma.	1	GVCDTVLGLLDSHLIK+LGLALNFSVFHYEIANSPEEAISLAK+VETELRGVCDTVLGLLDSHLIKGAGDAESR+YEDMAAFMKSAVEK+YLAEVATGDDKK	0.34279		1.28239				1.55907	4.25101
IPI00117977	Sftpb	SFTPB	pulmonary surfactant-associated protein b precursor.	1	AICNHVGLCPR+EDAFQEAIR+FLEQECDILPLK+YTVLLLDALLGR
IPI00117975	Sftpd	SFTPD	pulmonary surfactant-associated protein d precursor.	1	AAFLSMTDVGTEGK+GAPGVQGAPGNAGAAGPAGPAGPQGAPGSR+GDPGLPGPMGLSGLQGPTGPVGPKGENGSAGEPGPKGER+GENGSAGEPGPK+GERGLSGPPGLPGIPGPAGK+GESGLPDSAALR+GEVGAPGMQGSTGAK+LEVAFSHYQK+MLPFLSMLVLLVQPLGNLGAEMK+SATENAAIQQLITAHNK+TADSEKPFEDAQEMCK	20.3674
IPI00318175	Sgsh	SGSH	n-sulfoglucosamine sulfohydrolase.	1	ADLAAQYTTIGR+HVGPETVYPFDFAFTEENSSVMQVGR+MDQGVGLVLQELR+NLAADPDLAQVLEMLK+TNLYWPGTAEPLLVSSPEHPQR			17.9172
IPI00127358	Sh3bgrl3	SH3BGRL3	sh3 domain-binding glutamic acid-rich-like protein 3.	0.98	IQYQLVDISQDNALRDEMR+VYSTSVTGSR	1.38796		2.35288		2.36165	0.271114	0.721374
IPI00351827	Shank3	SHANK3	shank3.	0.87	FVVRSVSAR+GEKLDEILAVAAEPTLRPDIADADSR+GLPGPEDDKPTVISELSSRLQQLNKDTR+ISPSGPGGSGPAPGPGPASPAPPAPPPR+KSPIAAAR+LAGPSGLASPRPLQR+LDPTAPVWAAK+QVVGLIRQGGNRLVMK+RLAGPSGLASPRPLQR+SLGEEPVGGLGSLLDPAK+SLGEEPVGGLGSLLDPAKKSPIAAAR+SPGGPGGGASYSVRPSGR
IPI00230342	Shox2	SHOX2	isoform 1 of short stature homeobox protein 2.	0.94	AAGGGGGAGGGGGGGGGGGGGAGGGGAGGGAGGGR+AAGGGGGAGGGGGGGGGGGGGAGGGGAGGGAGGGRSPVR+SSPAVRAAGGGGGAGGGGGGGGGGGGGAGGGGAGGGAGGGR
IPI00129158	Sirpa	SIRPA	isoform 1 of tyrosine-protein phosphatase non-receptor type substrate1 precursor.	1	DGQELHHLETTVNPSGK+EDVVFTCQVK+GPSEPDTEIQSGGGTEVYVLAKPSPPEVSGPADR+ISNVTPEDAGTYYCVK+LLIYSFTGEHFPR+NNMDFSIR+VICEVAHITLDR+VVLNSMDVHSK	10.6837					6.04896	5.95675
IPI00756790	Sirpa	SIRPA	protein tyrosine phosphatase, non-receptor type substrate 1.	0.97	LLIYSFAGEYVPR+NNMDFSIR	10.6837					6.04896	5.95675
IPI00775779	Sirpa	SIRPA	ptpns1.	1	EDVVFTCQVK+GSSEPDTEIQSGGGTEVYVLAKPSPPEVSGPADR+ISNVTPEDAGTYYCVK+VICEVAHITLDR+VVLNSMDVHSK	10.6837					6.04896	5.95675
IPI00279304	Slc1a7	SLC1A7	excitatory amino acid transporter 5.	1	ETTEQSGKPVMSSADALLDLVR+MLILPLVVSSLMSGLASLDAK+TMINVLGDALAAGIMAHICR+TMINVLGDALAAGIMAHICRK
IPI00115564	Slc25a4	SLC25A4	adp/atp translocase 1.	0.87	RMMMQSGR					15.8507				YES
IPI00122287	Slc44a3	SLC44A3	choline transporter-like protein 3.	0.99	DAHTIIAK+GLGPTALCVSSCPEK+MQCLGAEYLVSAEK+MQCLGAEYLVSAEKTR+NSPVEGAPLSGQDMTLK+NSPVEGAPLSGQDMTLKK
IPI00314749	Slc4a4	SLC4A4	isoform 1 of electrogenic sodium bicarbonate cotransporter 1.	0.88	KNMYSGGENVQMNGDTPHDGGHGGGGHGDCEELQR+LIVPSEFKPTSPNR+LVGNNCDFVPDITLMSFILFLGTYTSSMAMK+METETSAPGEQPK+MFSNPDNGSPAMTHR+NMYSGGENVQMNGDTPHDGGHGGGGHGDCEELQR+RKNMYSGGENVQMNGDTPHDGGHGGGGHGDCEELQR
IPI00125333	Slpi	SLPI	antileukoproteinase precursor.	0.99	CMMLNPPNVCQR+CVNPVPIR	323.79		15.929				38.1756
IPI00125662	Smarcc1	SMARCC1	isoform 1 of swi/snf-related matrix-associated actin-dependentregulator of chromatin subfamily c member 1.	1	CFMDFKAGGTLCHILGAAYKYK+MAATAGGGPGAAAGAVGAGGAAAASGLAVYR+MAATAGGGPGAAAGAVGAGGAAAASGLAVYRR+MAATAGGGPGAAAGAVGAGGAAAASGLAVYRRK	0.310658								YES
IPI00467181	Smarcd3	SMARCD3	swi/snf-related matrix-associated actin-dependent regulator ofchromatin subfamily d member 3.	0.99	FSSFFKSLVIELDKDLYGPDNHLVEWHR+MAADEVAGGARK+MPHQGAPMGPPGSPYMGSPAVRPGLAPAGMEPAR+MPHQGAPMGPPGSPYMGSPAVRPGLAPAGMEPARK+VMTDVAGNPEEERRAEFYHQPWSQEAVSR
IPI00127277	Smr1	SMR3A	submaxillary gland androgen-regulated protein 1 precursor.	1	DSTDIFWR+LWELINSLLQQE
IPI00115157	Snca	SNCA	isoform 1 of alpha-synuclein.	1	EGVLYVGSK+EQVTNVGGAVVTGVTAVAQK+TKEQVTNVGGAVVTGVTAVAQK+TVEGAGNIAAATGFVK
IPI00353995	Snx25	SNX25	snx25.	1	DRYYPSFLVSDLYEKLMR+FLQTCSQVLVLCLLPSK+LAPPTRIR+LPFKSIDHK+MLATLTQLCLFLIVFDYSYR+QLRYQIVVEIIQATTISSFPQLKR+RLSEFQNLHR+TLIALVQVTFGRTINK
IPI00265207	Snx26	SNX26	tc10/cdc42 gtpase-activating protein.	1	CLLPRPKSLAGSSPSTR+FSCLPELPPPPEGTR+FSEAMSVPGEEER+GPSPASSSSSSPPAHPR+HNASYGMLGQSPPLHR+NSLGAPSALDR+QGLYSLGPPSFPPSSPAPVWR+QSDPILPWGASWAGR+SLSLEVGGEPVGTSGSGIHPPSLAHPGAWAPGPPPYLPR+TFFALGRGPSIPRK
IPI00130589	Sod1	SOD1	superoxide dismutase.	1	AVCVLKGDGPVQGTIHFEQK+DGVANVSIEDR+GDGPVQGTIHFEQK+GGNEESTKTGNAGSRLACGVIGIAQ+HVGDLGNVTAGK+LACGVIGIAQ+TGNAGSRLACGVIGIAQ+VISLSGEHSIIGR	4.8974		3.57153		2.62622	0.153238	2.17401		YES
IPI00114319	Sod3	SOD3	extracellular superoxide dismutase [cu-zn] precursor.	1	EVDAAEMHAICR+GGNQASLQNGNAGR+IDRLDLVEK+LACCVVGTSSSAAWESQTK+MLAFLFYGLLLAACGSVTMSNPGESSFDLADR+REVDAAEMHAICR+RLACCVVGTSSSAAWESQTK+SVVVHAGEDDLGK+SVVVHAGEDDLGKGGNQASLQNGNAGR+VGLTASLAGPHAILGR+VLEIWMELGR+VQPSATLPPDQPQITGLVLFR			15.929				5.45675
IPI00177047	Sorbs2	SORBS2	sorbin and sh3 domain containing 2.	0.8	ESDVVDVMEKCDDGWFVGTSRR+GLGDQSSSR+RVTVIKAPHYPGIGPVDESGIPTAIR+SFISSSPSSPSR				6.34234					YES
IPI00134475	Sord	SORD	isoform long of sorbitol dehydrogenase (fragment).	0.95	LENYPIPELGPNDVLLK+YNLTPTIFFCATPPDDGNLCR	0.318241	0.10396					0.579729		YES
IPI00308484	Sparcl1	SPARCL1	sparc-like protein 1 precursor.	1	ASLVPMEHCITR+AVSTEPTDAAVVPR+EEDIDENLLF+EPLEEQPTSK+EQSDDTLEESSQPTQISK+EWGHCFGIKEEDIDENLLF+FFEECDPNK+FFEECDPNKDK+FFEECDPNKDKHITLK+GHQLQLDYFGACK+HGAGDDYFIPSQEFLEAER+ILTHSELAPLR+KGHQLQLDYFGACK+LLAGDHPIELLLR+MHSLSYYLK+NILMQLYEPNPK+SIPACTDFEVAQFPLR+SLPENGDFPATVSTSYVDPNQR+TYSFEVDLK
IPI00378158	Spen	SPEN	isoform 1 of msx2-interacting protein.	0.99	EVSGFRGSAGGPAYGPPPSLHAR+FGEIVDIDIK+HLWVGNLPENVR+SREVSGFRGSAGGPAYGPPPSLHAR+VNGVPQYAFLQYCDIASVCK
IPI00153501	Spg20	SPG20	isoform 1 of spartin.	0.98	CIVNNVSAETVQTVR+QVEEEKPGAGK+VSQLLVDGVCTVANCVGK+YGHNAGEATHNAVDSAINVGLTAYNIDNIGIK
IPI00117857	Spi1-6		alpha-1-antitrypsin 1-6 precursor.	1	AVLTIDETGTEAAAVTVLLAVPYSMPPILR+DQSPASHEIATNLGDFAISLYR+FDHPFLFIIFEEHTQSPIFVGK+FDHPFLFIIFEEHTQSPLFVGK+FLEEAKNHYQAEVFSVNFAESEEAK+FLEEAKNHYQAEVFSVNFAESEEAKK+IFNNGADLSGITEENAPLK+IFNNGADLSGITEENAPLKLSQAVHK+IVEAVKKLDQDTVFALANYILFK+KLDQDTVFALANYILFK+KLDQDTVFALANYILFKGK+KPFDPENTEEAEFHVDESTTVK+KVINDFVEK+KVINDFVEKGTQGK+LAQIHFPR+LSISGEYNLK+LSISGEYNLKTLMSPLGITR+LVEKFLEEAK+MQHLEQTLSK+MQHLEQTLSKELISK+NHYQAEVFSV…
IPI00132416	Spink3	SPINK1	serine protease inhibitor kazal-type 3 precursor.	1	IYDPVCGTDGITYANECVLCFENR
IPI00346978	Spink5	SPINK5	serine peptidase inhibitor, kazal type 5.	1	CALCAEIFMR+CAMCAELFLK+ESDPILGPDGR+GISKDECSEFQNLMK+KDGDFICPSDTSSVCGTDGK+KEAVQELCR+LTCPETDDPVR+NGTLTCPKGNNSSQSLNDIIFQSECILCK+NLNPVCGDDGQTYSNPCMLCHENLMR+RGSEESETYAK+SEGECGSSHLETDMCSDFR+TATVPMLLTLAFYLTQDAAGEK
IPI00270149	Spnb4	SPTBN4	spectrin beta 4.	1	DFLTTMELNQQK+EPPAAANAAASLFECSR+GNLEVLLFSIQSK+GPASGGTHGGEPLLSLHK+LLEATSGSGGAAGTAGGAHDLSSTAR+LQSMESQVEEWCR+QCRALLEMGHPDSEQISRR+QHRALTGEVEAHR+QLATLGGASGAGPLVVALQVR+RLLHMESQLQDVDPGGDLATVNSQLKK+RPRPREGGEGGGSRR+RQLATLGGASGAGPLVVALQVR+SWVSLYCVLSK+VFQEMVYMVDWMEEMQTQLLSR+VQGVAELAQALAAEGYYDAR
IPI00310907	Spon1	SPON1	spondin-1 precursor.	0.83	SEQLREESDGEQFPGCR	22.6751	6.84569	13.2315	3.3585			4.74555	0.553672
IPI00309133	Spp1	SPP1	mammary gland rcb-0527 jyg-mc.	1	ESHESADQSDVIDSQASSK+GDSLAYGLR+GSHESSQLDEPSLETHSLEHSK+KLYSLHPDPIATWLVPDPSQK+LYSLHPDPIATWLVPDPSQK+QNLLAPQNAVSSEEK+QNLLAPQNAVSSEEKDDFK							2.33054
IPI00625970	Spp1	SPP1	bone marrow macrophage cdna, riken full-length enriched library,clone:i830015p03 product:secreted phosphoprotein 1, full insertsequence.	1	ESLDVIPVAQLLSMPSDQDNNGK+ESQESADQSDVIDSQASSK+ESQESADQSDVIDSQASSKASLEHQSHK+GDSLAYGLR+GSHESSQLDEPSLETHR+KLYSLHPDPIATWLVPDPSQK+LYSLHPDPIATWLVPDPSQK+QNLLAPQNAVSSEEK+QNLLAPQNAVSSEEKDDFK+SFQVSDEQYPDATDEDLTSHMK							2.33054
IPI00173135	Spp2	SPP2	secreted phosphoprotein 24 precursor.	1	DSGDPSTCAFQR+GYSVPTAACR+NDYLLGFLSDESR+RVNVLDEDTLVMNLEFSVQETTCLR+VNSQSLSPYLFR+VNVLDEDTLVMNLEFSVQETTCLR	4.2279
IPI00474598	Srebf2	SREBF2	sterol regulatory element binding factor 2.	0.97	ATAILLACR+GIDLGSLVDSDVDLK+QADLDLAK+WRATPATAAGFEDEAK
IPI00123821	Srgn	SRGN	secretory granule proteoglycan core protein precursor.	1	GPQFDLIDESNNIGPPMNNPVLMEGPSK+ILTEQNQDQPEDDFII			85.5977	6.34234	52.4776	6.8112	10.6092	2.50057
IPI00224456	Srl	SRL	isoform 1 of sarcalumenin precursor.	1	EAEGEGNTGSDHQSTELDGTQDAIPAGDESEAR+IILNKADNLATQMLMR+NLLLHYPDGR+TPGATGHEEEGPQLDVEDLNTGFEGSK
IPI00387377	Srp54	SRP54	isoform 1 of signal recognition particle 54 kda protein.	0.85	GMMGFNNM+KLMTIMDSMNDQELDSTDGAK+MMDPRVLHHMGGMAGLQSMMRQFQQGAAGNMK+VLHHMGGMAGLQSMMR	1.06511
IPI00222977	Srp68	SRP68	signal recognition particle 68 kda protein.	1	MAAEKQIPGGGSGGGGSGSGGGGGGSGGGR+MAAEKQIPGGGSGGGGSGSGGGGGGSGGGRSAGGDENK+QIPGGGSGGGGSGSGGGGGGSGGGR+QIPGGGSGGGGSGSGGGGGGSGGGRSAGGDENK+SGGTEGLLAEKLEALITQTR						0.801318	3.47837
IPI00556861	Srrm2	SRRM2	serine/arginine repetitive matrix 2.	1	AQSGTDSSPEHK+EETPGQRPVVTETHQLAELNEKK+GPSPEGSSSSESSPEHAPK+GRSHSSSSSPSPSR+HSGSTSPYLK+RAHRSTSADSASSSDTSR+RSSSELSPEVVEK+SLSGSSPCPK+SPVPSAFSDQSR+SRTPSRQSCSGSSPR+STSADSASSSDTSR	0.84558		15.929		0.271786		0.779535		YES
IPI00229424	Sspo	SSPO	sco-spondin precursor.	0.86	AGTEPPAAFGGAECQGPNLDAEFCSLRPCR+CPVACGWSPWTPWSPCSQSCNVGIR+DCNMHPCTAQCPGNMVFR+HQVPAPGQAGEGTPCTR+QGVLEPTAELTAHSWR+QQDDFLTPAGDIETSVTAFASK+SCGGLGTRTRTR+SCGTGLASR+SCSGSAPGNPVCLGPHTQTR+SCSSPPPK+SRVCSHPPISDGGKPCLGGYQQSRPCR+WHCAQALCPAECAVGGDGHYFTFDGR
IPI00153959	Stab1	STAB1	isoform 1 of stabilin-1 precursor.	0.96	ATCMCRPGMTSINNNASEGCHVSCKPHSCDR+CPQNSQCSAEAPTCK+DPCLDGHR+DPCLDGHRGGCSEHADCLNTGPNTRR+DPCLTNFGGCPSNSTFCLYR+EGYSGDGIQTCK+GAAISLSGCSQECWK+GSGQCNCHPGFAGTACELCAPGAFGPQCQACR+KSCVYRSGLSFSR+VLTMANQVLTVNISEGGR+YHVVGCRK							0.270761	0.176169
IPI00114979	Stat5a	STAT5A	signal transducer and activator of transcription 5a.	0.81	LNVHMNPPQVK+RPMDSLDAR
IPI00121514	Stip1	STIP1	stress-induced-phosphoprotein 1.	1	ALSAGNIDDALQCYSEAIK+AMADPEVQQIMSDPAMR+AMADPEVQQIMSDPAMRLILEQMQK+DCEECIQLEPTFIK+ELIEQLQNKPSDLGTK+EPKPEPMEEDLPENKK+FMNPFNLPNLYQK+KAAALEAMK+LAYINPDLALEEK+LDPQNHVLYSNR+RAMADPEVQQIMSDPAMR+SLLSDPTYR	0.443331	0.0695306	0.25692		0.783517	0.337976	0.64197
IPI00319135	Surf1	SURF1	surfeit gene 1.	0.87	CCSSTAETAAAK+KPFVPENSPER+MAAVMALAVLPR+NLEYRPVK
IPI00112858	Svep1	SVEP1	polydom precursor.	0.97	CQCPAGFTGTHCELNINECQSNPCR+ELNDMASTPK+GYMGVHCETDVNECQSSPCLNNAVCK+ICLTNGSWSGATPSCMPVR+KLLSDFPVVSTATRVAIVTFSSK+LLSDFPVVSTATR+TFESEAR+VDSSSMFCSDCPSLEGSVPHLRPASGNR+VYIDGELSDGGTGLSIGKAIPGGGALVLGQEQDK							8.43512
IPI00120271	Sycn	SYCN	syncollin.	1	CEITVWSLPGK+GIFGDWSDSISALYCK
IPI00403993	Syne1	SYNE1	synaptic nuclear envelope 1 isoform 3.	1	AELEKVLRVAQEGLEEK+AELEQETK+AELMTLLESHDTYLMDLESQQLTLGVLQQR+AWAEAMNSAVHAQSTLESVIDQWNDYLEKK+CEADELDHWLLNTK+CSLSQPGPSVSSPK+DALAVYLSAEDISMLKER+DLTTILTKLKAK+DMWESLLSAAIR+EAAELPLGPR+EDVIPSGLPQAEDR+EGVIELMNDAEK+ELIDSREIGAGRLSR+ENLEDAFTIAETQLGIPR+ETLVAVQQLDK+GAVGLSGDPSSLESQMR+HLLSELKK+KVEMFLGELLAAR+LLTGSSEAVQVQVDNLQNLHDELEK+MLSQSEHAK+QALQDCVSELGSFEDQHRK+QLEVIENSIPSVGLVEESEDR+QLLLSADSGAEAALQAELTDIQEK+QNTAA…							5.95675
IPI00117007	Tagln2	TAGLN2	mkiaa0120 protein (fragment).	1	DDGLFSGDPNWFPK+GASQAGMTGYGMPR+LINSLYPEGQAPVK+LINSLYPEGQAPVKK+NFSDNQLQEGK+NVIGLQMGTNR+TLMNLGGLAVAR+YGINTTDIFQTVDLWEGK	0.710914	0.509581	1.25545	0.223843	1.47869		2.24855
IPI00129803	Tap1	TAP1	antigen peptide transporter 1.	0.99	EALAYVAEVWTTSVSGMLLK+NPAGSITSR		12.3069		9.84909		8.57344	1.48919	12.1123	YES
IPI00110539	Tbx20	TBX20	isoform 1 of t-box transcription factor tbx20.	0.83	EAAENTIKPLEQFVEK
IPI00136556	Tcn2	TCN2	transcobalamin-2 precursor.	1	ANCEFFGSR+APDTPLLQGIADYKPQDGETIELR+EDLYLHSLK+FNFNSDLRPR+IHYQQCLLR+ITMAIETVR+LAQDGGGFTYGTQASLSGPYLTSVLGK+LSGGSLALYLLALR+LSSEQLNPSVFVGLR+LSSMQAGTKEDLYLHSLK+SQAPEGYFGNIYSTPLALQMLMTSPASGVGLGTACIK+TYLDLIFPDCQASR+VMLVPAVEDPVHISEVISVTLK+WFLEDEKK			5.97634
IPI00320527	Tcp11l2	TCP11L2	t-complex 11 (mouse) like 2.	0.9	DNPVCTLMDK+ELEVLGCQYANIVNLNK+KVLPETLMTDGPR+MTACVALITNNMVGAVTEGLPELANR+NLSDMTLAHEIAVNENFQLK+QCVSEDQQSDSESSR
IPI00221547	Tek	TEK	endothelial-specific receptor tyrosine kinase.	0.96	ASGWPLPTSEEMTLVKPDGTVLQPNDFNYTDR+CSGPEGCK+FQDVIGEGNFGQVLK+ISNITDSTAMVSWTIVDGYSISSIIIRYK+KTYVNTTLYEK+LGHHPNIINLLGACEHR+MLLIAILGSAGMTCITVLLAFLIMLQLK+QQASFLPATLTMTVDR+SQTALNLTWQPIFTNSEDEFYVEVER+VPGNLTSVLLSNLVPR
IPI00120499	Tff1	TFF1	trefoil factor 1 precursor.	1	GCCFDDSVR+GFPWCFHPMAIENTQEEECPF+INCGFPGVTAQQCTER
IPI00124840	Tff3	TFF3	trefoil factor 3 precursor.	1	VDCGYPSVTSEQCNNR
IPI00404625	Tfpi	TFPI	12 days embryo embryonic body between diaphragm region and neck cdna,riken full-length enriched library, clone:9430031l05 product:tissuefactor pathway inhibitor, full insert sequence.	1	AALVLYHLYDILK+AALVLYHLYDILKK+AASGAERPDFCFLEEDPGLCR+FDTLEECK+FVYGGCLGNR+NNFETLDECK					342.567	129.749
IPI00114457	Tgfb1	TGFB1	transforming growth factor beta-1 precursor.	1	SSVEQHVELYQK+VAGESADPEPEPEADYYAK+VLALYNQHNPGASASPCCVPQALEPLPIVYYVGR			5.97634
IPI00122528	Tgfbi	TGFBI	transforming growth factor-beta-induced protein ig-h3 precursor.	0.97	EGVYTVFAPTNEAFQAMPPEELNK+GDELADSALEIFK			160.243	14.3558			15.8702	6.75141
IPI00124569	Tgfbr2	TGFBR2	isoform rii-2 of tgf-beta receptor type-2 precursor.	0.95	LTYHGFTLEDAASPK+NITLETVCHDPK+QTDVYSMALVLWEMTSR
IPI00314779	Tgfbr3	TGFBR3	tgf-beta receptor type iii precursor.	1	CELSPISASHPVQALMESFTVLSGCASR+EDPEVVKNLVLILKCK+ENVPNMK+NIYIKVGEDQVFPPTCNIGK+SVFNTSLLFLHCELTLCSR
IPI00118413	Thbs1	THBS1	thrombospondin 1.	1	AQLYIDCDKMESAELDVPIQSIFTR+CGACPPGYSGNGIQCK+DCVGDVTENQVCNK+DNCQYVYNVDQR+FVFGTTPEDILR+GDVNDNFQGVLQNVR+GFIFLASLR+GQDLSSPAFR+IENANLIPAVPDDKFQDLLDAVWADK+LCNNPTPQFGGK+NNEEWTVDSCTECHCQNSVTICK+QQVVSVEEALLATGQWK+TIVTTLQDSIR+TKDLQAICGLSCDELSSMVLELK+VSCPIMPCSNATVPDGECCPR	36.5069	6.65346	135.361		52.1443	19.9418	50.5675	3.87571
IPI00130445	Thbs4	THBS4	thrombospondin-4 precursor.	1	CDACPVGFTGPMVQGVGINFAK+CVNLAPGFR+DVDIDSYPDEELPCSAR+NILDNCPR+NPEQNPCSVHAQCIEER+NSDKDIFGDACDNCR+NSDKDIFGDACDNCRMVLNNDQK+QFLGQMTQLNQLLGEVK	10.6837		50.7634	3.67117
IPI00129075	Thumpd3	THUMPD3	isoform 1 of thump domain-containing protein 3.	0.82	DTKEEVLRDFEELAGK+ECLGMNLDGNK+KCFTKALSGMGHVWR+NWNLYPACLR+SVDNLFVVVQEFK
IPI00320341	Tie1	TIE1	tyrosine-protein kinase receptor tie-1 precursor.	0.99	AAEEGLDQQLVLAVVGSVSATCLTILAALLALVCIR+FGQSCQEQCPGTAGCR+LYHCTLLGPASPPAHVHLPPSGPPAPR+NGSHQVTLR+QLVVSPLVSFSGDGPISSVR+SDVWSFGVLLWEIVSLGGTPYCGMTCAELYEK+VSWSLPSVPLSGDGFLLR					38.1269
IPI00229816	Timd4	TIMD4	t-cell immunoglobulin and mucin domain-containing protein 4 precursor.	0.91	VQFGEVSLTISNTNR
IPI00114403	Timp1	TIMP1	metalloproteinase inhibitor 1 precursor.	0.99	LESDTHCLWTDQVLVGSEDYQSR+SEEFLITGR	52.6464		642.948	6.34234	231.187	11.0979	20.9864
IPI00113863	Timp2	TIMP2	metalloproteinase inhibitor 2 precursor.	1	AVSEKEVDSGNDIYGNPIKR+CPMIPCYISSPDECLWMDWVTEK+EVDSGNDIYGNPIK+EVDSGNDIYGNPIKR+FFACIK+GAAPPKQEFLDIEDP+GPDKDIEFIYTAPSSAVCGVSLDVGGK+MHITLCDFIVPWDTLSITQK+QEFLDIEDP+SDGSCAWYR+YQMGCECK	168.851		150.29		112.381	13.6224	13.3919
IPI00137409	Tkt	TKT	transketolase.	0.91	CEAFGWHTIIVDGHSVEELCK+DDQVTVIGAGVTLHEALAAAESLK+FIECYIAEQNMVSIAVGCATR+IIALDGDTK+QAFTDVATGSLGQGLGAACGMAYTGK	1.50681	1.91844	1.43637	1.28878	0.337406	0.813109	2.42103	1.18145	YES
IPI00465786	Tln1	TLN1	talin-1.	1	AAMEPIVISAKTMLESAGGLIQTAR+AVEDEATK+AVTQALNR+DDILNGSHPVSFDK+EKMVGGIAQIIAAQEEMLR+EKMVGGIAQIIAAQEEMLRK+EVANSTANLVKTIKALDGDFTEENR+GTEWVDPEDPTVIAENELLGAAAAIEAAAK+HTSALCNSCR+ILAQATSDLVNAIK+LAQAAQSSVATITRLADVVK+LLSAAKILADATAK+LNEAAAGLNQAATELVQASR+MVGGIAQIIAAQEEMLR+QAAASATQTIAAAQHAASAPK+QEDVIATANLSR+TMQFEPSTMVYDACRMIRER+VAGSVTELIQAAEAMK+VQELGHGCSALVTK	0.729257	0.511573	0.305803	0.794502	0.326688	1.41926	2.32938	2.19897	YES
IPI00463721	Tmprss9	TMPRSS9	transmembrane protease, serine 9.	0.86	CMISGWGNMQEGNATKPDILQK+MEPTAPDLQLVPEVTK+MLCAGFLEGR+MLCAGFPQGGVDSCSGDAGGPLACR+VAAVLGWIGQNIQE+YIQPVCLPLAIHKFPVGRK+YVQPACLPAATHVFPPGKK
IPI00115538	Tmsb4x	TMSB4X	isoform long of thymosin beta-4.	0.98	NPLPSKETIEQEK+TETQEKNPLPSKETIEQEK							4.58715
IPI00224237	Tmtc3	TMTC3	isoform 1 of transmembrane and tpr repeat-containing protein 3.	0.8	DSEAESWMK+ILEMDPSNVQGK+KLSWVCLSMVILTHALK+LSWVCLSMVILTHALK+RSSMIAALLFAVHPIHTEAVTGVVGR
IPI00403938	Tnc	TNC	isoform 1 of tenascin precursor.	1	CICNEGYTGIDCSEVSPPK+CVNGMCICDDDYTGEDCR+DGFAGEDCNEPLCLNNCYNR+EFTATEVQSETALLTWRPPR+ETFITGLDAPR+GQCEEGQCVCNEGFAGADCSEK+GQCEEGQCVCNEGFAGADCSEKR+LEELELLVSSLR+LPMGSQCSVDLESASGEK+TTLTGLRPGTEYGIGVSAVK+VDLQDHGESAYAVYDR+VDMASNPAKETFITGLDAPRNLR+VSQTDNSITLEWR	26.8232			3.67117	283.164	435.211	85.2647	42.6978
IPI00137744	Tnfrsf1b	TNFRSF1B	tumor necrosis factor receptor superfamily member 1b precursor.	1	ACAPGTFSDTTSSTDVCRPHR+ICSILAIPGNASTDAVCAPESPTLSAIPR+TCLSCSSSCTTDQVEIR							5.95675
IPI00110366	Tnfrsf21	TNFRSF21	tumor necrosis factor receptor superfamily member 21 precursor.	1	AHTDCLGQNLEVVKPGTK+CHDCSQPCPWPMIER+ECICPPGMYQSNGTCAPHTVCPVGWGVR+GTFSDVPSSVMK+LPCAALTDR+TLSLPGTYR+VCSSCPAGTFTR
IPI00118019	Tnfrsf9	TNFRSF9	tumor necrosis factor receptor superfamily member 9 precursor.	0.98	CPQEEEGGGGGYEL+FCSSTHNAECECIEGFHCLGPQCTR
IPI00420879	Tnks	TNKS	tankyrase, trf1-interacting ankyrin-related adp-ribose polymerase.	0.92	DGGNAGGIFNR+EGDTDIQDLLRGDAALLDAAK+LMALLTPLNVNCHASDGR+MNALDSLGQTALHR+QPQSHETALHCAVASLHPK+SNQYVYGIGGGTGCPTHKDR+TQLCALLLAHGADPTMK							1.73919
IPI00130794	Tnxb	TNXB	tenascin x.	0.94	CENGLCVCNPGYSGEDCGVR+CVCDPGYSGEDCGVR+CVCNPGFTGEDCGSR+CVCWPGYSGEDCSTR+EHCTGGCCPTAAQAGTGQTDVR+ETTEAWTEVPTTSTPAAVPR+GPFDSFVVQYQDTENETQALLVDGDQDK+HGPLMAEAK+ILIQSDPDPGSPPR+LGELTVTGSSPDSLSLSWTIPK+LGELTVTGVTPDSLR+RLGPVSVEGTTAPVEK+TCPWDCGDGGR+TLQQRELMVPGVRR+TQLTDLMPGVEYVVTVTAER+VGPLSVIAVTDPR							1.73919
IPI00377728	Tomm70a	TOMM70A	mitochondrial precursor proteins import receptor.	0.82	ATFYLLIGSANAAKPDLDK+ILLDLVEEAVADFDACIR+MAASKPIEAAMAAAAAPGSGNGVGGGGGTAGPGSGAGTLPR+NVDLSTFYQNR+QAYTANNSSQVQAAMK+YGLKPPTL	0.478986								YES
IPI00467833	Tpi1	TPI1	triosephosphate isomerase.	1	CLGELICTLNAANVPAGTEVVCAPPTAYIDFAR+DLGATWVVLGHSER+ELASQPDVDGFLVGGASLKPEFVDIINAK+FFVGGNWK+HVFGESDELIGQK+IIYGGSVTGATCK+VSHALAEGLGVIACIGEK+VTNGAFTGEISPGMIK+VVLAYEPVWAIGTGK	1.13431	0.672682	2.21947	0.218694	0.854645	0.143131	1.76559	0.0920142
IPI00230044	Tpm3	TPM3	isoform 2 of tropomyosin alpha-3 chain.	1	IQLVEEELDR+IQVLQQQADDAEER+KIQVLQQQADDAEER+MLDQTLLDLNEM	46.1906	97.1088	1.41337	0.233694	0.288195	0.0640815		3.87571
IPI00421223	Tpm4	TPM4	tropomyosin alpha-4 chain.	1	AQEQLATALQNLEEAEK+CGDLEEELK+CGDLEEELKNVTNNLK+IQALQQQADDAEDR+IQLLEEELDR+KIQALQQQADDAEDR+KLVILEGELK+KLVILEGELKR+MEILEMQLK+YEEEIKLLSDK	0.794696	1.37683	0.99542	0.463092	0.529336	0.0607669	0.631121	0.0738744
IPI00230447	Treml1	TREML1	isoform 2 of trem-like transcript 1 protein precursor.	1	LVVCGPSQSTGVPGMDPPSAAHR+VSLLVLPPVPGPR+VWCQFLQEGCHPLVTSAVDR
IPI00139788	Trf	TF	serotransferrin precursor.	1	ADRDQYELLCLDNTR+ASDTSITWNNLK+AVLTSQETLFGGSDCTGNFCLFK+AVSSFFSGSCVPCADPVAFPK+CDEWSIISEGK+DFASCHLAQAPNHVVVSR+DFQLFSSPLGK+DGGGDVAFVK+EDLIWEILK+GTDFQLNQLEGK+GYYAVAVVK+HQTVLDNTEGKNPAEWAK+IECESAETTEDCIEK+KGTDFQLNQLEGK+KPVDQYEDCYLAR+LCQLCPGCGCSSTQPFFGYVGAFK+LYLGHNYVTAIR+NLKQEDFELLCPDGTR+NQQEGVCPEGSIDNSPVK+NSTLCDLCIGPLKCAPNNKEEYNGYTGAFR+QEDFELLCPDGTR+SAGWVIPIGLLFCK+SKDFQLFSSPLGK+TAGWNIPMGMLYNR+VAQEHFGK+YL…
IPI00312128	Trim28	TRIM28	isoform 1 of transcription intermediary factor 1-beta.	0.83	MAASAAATAAASAATAASAASGSPGSGEGSAGGEK+MIVDPVEPHGEMK+MNDAFGDTK+QGSGSSQPMEVQEGYGFGSDDPYSSAEPHVSGMK+QGSGSSQPMEVQEGYGFGSDDPYSSAEPHVSGMKR+RPAASSAAAASAAASSPAGGGGEAQELLEHCGVCR	0.506215	0.0639756	0.696845	0.478528	1.80597		0.335919	0.132085	YES
IPI00753510	Trio	TRIO	similar to triple functional domain.	0.99	APTLYHCLPPWPFSSTASFSR+ASSTRPDXPPSLSGANTRMMFDLSVALKTSYR+CWAGSEMESPCXMLGSSRPARCR+EPNEQWPQSLXTR+ETVAAHPSIPQTIPSSHPPHPLMR+GMAAASPTPFPSPPGHLR+IFCSMSMR+IQSSDSFPK+LPAQLSSSVLLK+MSGSSGGATAPAASSGPAAAASAAGSGCGGGAGEGAEEAAK+RHEDFEEVAQNTYTNADK+SAVMTXXTSGGCRDLTVKLLPR+STSSSQRTWDTASSPGQTSFRCMSHTAK+THGVLGCSPTCCSAACPPSWMTAWK+TSSSSXGTPPSPVTKLR			10.9527	3.67117		6.04896
IPI00380829	Trip11	TRIP11	thyroid hormone receptor interactor 11 isoform 3.	0.8	AMYSAELEK+DETALQLSVSQEQVK+KLMSLVNSTEGK+LDEANAALDSASR
IPI00330902	Trrap	TRRAP	transformation/transcription domain-associated protein.	0.96	ALLFVMMDLTGEVSNGAVAMAK+CYLQLAGVMGK+EKSILLVKMMTYIEK+EYMEEEIPK+FITLLLPGGAQTAVRPGSPSTSNMR+GMDPLVLIDAIAICMAYEEK+GYLAICHPEEQQLSFIER+KLVSTFGVGLENVSNVSTMFSSAASESLARR+KQAMHSLQVLAQVTGK+KYLQFVAALTDVNTPDETK+LLLNLVDCIRSKSEQESGNGR+LVFGSVSLFAAENEQMLKPHLHK+LVLEILHR+QQHALAGEISPFLCSGSHQVQR+RAQATAQDPVFQK+SKSEQESGNGRDVLMR+YFTKEMTAEFYALK
IPI00719897	Try10		trypsinogen 10.	1	LGEHNINVLEGNEQFIDAANIIKHPK+TLDNDIMLIK
IPI00406464	Try4		adult male stomach cdna, riken full-length enriched library,clone:2210415m03 product:tesp4 (0910001b19rik protein) (trypsinogen9), full insert sequence.	0.87	LGEHNINVLEGNEQFVNSAK+MNSLLFLALVGAAVAFPVDDDDKIVGGYTCR+VCNCGLDSGHHCRK
IPI00404087	Ttf1	TTF1	0 day neonate eyeball cdna, riken full-length enriched library,clone:e130112j05 product:hypothetical protein, full insert sequence	0.84	VRLRPEAVVPVPR+VVSGGCAGPEVGLVG
IPI00112371	Ttf2	TTF2	transcription termination factor, rna polymerase ii.	0.81	CSPFDEFSLWK+GVPNKPETLR+TLTMIALILTK
IPI00127560	Ttr	TTR	transthyretin precursor.	1	FVEGVYR+HYTIAALLSPYSYSTTAVVSNPQN+LFLLCLAGLVFVSEAGPAGAGESK+LFLLCLAGLVFVSEAGPAGAGESKCPLMVKVLDAVR+TAESGELHGLTTDEK+TLGISPFHEFADVVFTANDSGHR+TSEGSWEPFASGK	4.2279			3.67117					YES
IPI00110753	Tuba1a	TUBA1A	tubulin alpha-1 chain.	0.83	AVFVDLEPTVIDEVR	504.552	1114.73		505.851
IPI00169463	Tubb2c	TUBB2C	tubulin beta-2c chain.	0.95	GHYTEGAELVDSVLDVVR+INVYYNEATGGK+KLAVNMVPFPR+SGPFGQIFRPDNFVFGQSGAGNNWAK	1.55341	3.83576	0.588559	1.10683		1.0809	1.19093	1.01168
IPI00117352	Tubb5	TUBB	tubulin beta-5 chain.	0.99	EAESCDCLQGFQLTHSLGGGTGSGMGTLLISK+GHYTEGAELVDSVLDVVR+ISVYYNEATGGK+KEAESCDCLQGFQLTHSLGGGTGSGMGTLLISK+KLAVNMVPFPR+RISEQFTAMFR+SGPFGQIFRPDNFVFGQSGAGNNWAK
IPI00226993	Txn1	TXN	thioredoxin.	1	CMPTFQFYK+EAFQEALAAAGDK+EKLEASITEYA+MIKPFFHSLCDK
IPI00315554	Ube2l6	UBE2L6	bone marrow macrophage cdna, riken full-length enriched library,clone:i830047m24 product:ubiquitin-conjugating enzyme e2l 6, fullinsert sequence.	0.85	LELADLLTQNPEMFRK+QLSSDDANVLVWHMLLLPDQLPYGLK	0.42279			2.27641
IPI00165854	Ube2n	UBE2N	ubiquitin-conjugating enzyme e2 n.	1	LELFLPEEYPMAAPK+YFHVVIAGPQDSPFEGGTFK	1.58471	0.855256	1.36908		1.98134		2.97837
IPI00113257	Ube2v1	UBE2V1	isoform 1 of ubiquitin-conjugating enzyme e2 variant 1.	0.97	GVGDGTVSWGLEDDEDMTLTR+LLEELEEGQK+VILQELR	0.380569		15.93		1.68507
IPI00118376	Ubr1	UBR1	e3 ubiquitin-protein ligase ubr1.	1	ATCPQVLIHK+CLVLVAQVVAEMWR+CLVLVAQVVAEMWRR+ECHKAVMRCSTNFMSSTK+EKSCLVVATTSGLECIK+ILTCMQGMEEIR+MADEEMDGAER+SCLVVATTSGLECIK
IPI00309724	Unc45a	UNC45A	unc45 homolog a.	0.99	AATECMCNLAMSK+AESEASKAIEKDGGDVK+AKRASFITANGVSLLK+AVEYRLIQPNQDGE+EEEQLVAVEALIHAAGK+EIAGTLMESEVLEILSVLAK+KILEVGGSLQDAAGELTVTANSR+LLAAGVVSAMTCMVK+MTVSGPETPEPRPSDPGASSAEQLR+SQALEKLGRLDQAVLDLK+TESPVLTNSCR
IPI00119087	Uros	UROS	uroporphyrinogen-iii synthase.	1	IGLDAEGAGSGNAEK+SYYEDQGIPASITFFSPSGLK+YSLEYIQALSGSSFDQIK
IPI00679156	Usp35	USP35	ubiquitin specific peptidase 35 isoform 3.	0.9	EDPAAEPGSPR+ELFAVISCTGACEPPSSALASVVQHLPLELMDGVVR
IPI00353420	Utrn	UTRN	utrophin.	1	AQQLELEEGLSSHQPSLIK+CMKLYKTLSEVK+DMLAQLNAK+ELGQTLIDGGILDDIISEK+ETDHMLQVLK+LLDLLEGLTGTSLPK+MISQQLEDLGR+QIHVDVEAK+QLGLLLHDAIQIPR+QPDVIVEASGPEAIQIR+QPDVIVEASGPEAIQIRDMLAQLNAKWDR+QSRLHDALMELQKK+SQPPTSPEGR+STSEGVIGDLDTEISWAK+TMNDLSSQLSPLDLHPSLK+VLYNDLGAQVTEGK+VVEKHLDPNNDEK
IPI00321074	Vasn	VASN	vasorin precursor.	1	ATEGGGEALSGGPECEVPLMGYPGPSLQGVLPAK+EGNLPLLIAPALAAVLLAVLAAAGAAYCVR+GQVGPGTGPLELEGVK+HIQPGAFDALDR+LLLLDLSHNSIPALEAGILDTANVEALR+LLNLHDLDVSDNQLEHMPSVIQGLR+NLSGPDKRLVTLR+QLDEGLFGR+TPEGEEACGEANTSQAVR+YLQGNTVQLR	6.62247		30.858	3.67117		11.0979	8.43512
IPI00466217	Vasp	VASP	40 kda protein.	0.89	RWLPAGTGPQAFSR+SSSSVTTSEAHPSTPCSSDDSDLER					0.601812		0.397116
IPI00126072	Vat1	VAT1	synaptic vesicle membrane protein vat-1 homolog.	0.99	ACGLNFADLMGR+CLVLTGFGGYDK+ENGVTHPIDYHTTDYVDEIK+GVDIVMDPLGGSDTAK+LPPLPVTPGMEGAGVVVAVGEGVGDR	0.693979	1.02708		1.7027		1.84081	0.766829	0.744479
IPI00121851	Vbp1	VBP1	prefoldin subunit 3.	0.95	LHLGIPEAVFVEDVDSFMK			0.995698	0.333743
IPI00126834	Vcam1	VCAM1	isoform 1 of vascular cell adhesion protein 1 precursor.	1	CLAPDIYPVYR+DDSGIYVCEGINEAGISR+DIQLTVFPSK+DPEIQFSGPLEVGKPVTVK+EGDTVIISCTCGNVPETWIILK+ELQVYISPR+ILETTFIPTIEDTGK+LEIDLFK+LHIDQIDSTLK+LQEGGAVTMTCSSEGLPAPEIFWGR+LQEGGAVTMTCSSEGLPAPEIFWGRK+QAQLQDAGIYECESK+SLEVTFTPVIEDIGK+STLVLSSVGFEDEHSYLCAVTCLQR+SVLTMEPVSFENEHSYLCTATCGSGK+TIAQIGDSMALTCSTTGCESPLFSWR+TQIDSPLNAK+TQIDSPLNAKVRTEGSK+TQTDSPLNGVVR+TQVEVYSFPEDPVIK+YFLEEMGIK							5.95675
IPI00264750	Vcam1	VCAM1	isoform 2 of vascular cell adhesion protein 1 precursor.	1	CLAPDIYPVYR+DKAEVELVVQDGR+DPEIQFSGPLEVGKPVTVK+ELQVYISPR+LEIDLFK+LHIDQIDSTLK+LQEGGAVTMTCSSEGLPAPEIFWGR+LQEGGAVTMTCSSEGLPAPEIFWGRK+MEDSGVYVCEGVNLIGRDKAEVELVVQDGR+SLEVTFTPVIEDIGK+SVLTMEPVSFENEHSYLCTATCGSGK+TIAQIGDSMALTCSTTGCESPLFSWR+TQIDSPLNAK+TQIDSPLNAKVRTEGSK							5.95675
IPI00405227	Vcl	VCL	vinculin.	1	ALASQLQDSLK+AQMQEAMTQEVSDVFSDTTTPIK+AQQVSQGLDVLTAK+AVAGNISDPGLQK+CDRVDQLTAQLADLAAR+CKVAMANIQPQMLVAGATSIAR+DEEFPEQKAGEVINQPMMMAAR+DPNASPGDAGEQAIR+EAVKAASDELSKTISPMVMDAK+ELLPVLISAMK+ELTPQVISAAR+ETVQTTEDQILK+GILSGTSDLLLTFDEAEVR+KIDAAQNWLADPNGGPEGEEQIR+LANVMMGPYR+LLAVAATAPPDAPNREEVFDER+MALLMAEMSR+MLGQMTDQVADLR+MSAEINEIIR+SLGEIAALTSK+STVEGIQASVK+TNISDEESEQATEMLVHNAQNLMQSVK+VDQLTAQLADLAAR+VLQLTSWDEDAWA…	0.262864		0.982288	0.0414532	0.744857	0.0544952	1.23033	1.42164
IPI00125538	Vps13b	VPS13B	similar to vacuolar protein sorting 13b isoform 1 isoform 5.	0.99	AILTPILTDFSVR+CASGTLGSIK+CTCTVFMAEFNLLDCLLPVIMGGK+DFLNGPADIYLDVSKPLK+EHCHVPDSATFSICPGGEHPAVR+GALTSITNLATSLAR+GLTYLTNSLFDYR+HISKGALTSITNLATSLARNMGR+HSGNPGPQQSIPK+KVDTFDGGTAETSSR+LDSSAVHRVLK+LGSEPVVITINTMECILK+LLPVGPDGR+QSVAVPFGTGR+QVTLSLVEPMGCTSTLAVTSQK+SSSLPCWDVTPAVGSSELDTATLQK+SWYHGQTSIPGTLVLCLPQIKIISAGHK+TSCHLAPSCSSMQTCSVVAVEPPPATVK
IPI00132167	Vps25	VPS25	isoform 1 of vacuolar protein sorting-associated protein 25.	0.83	KLPVESIQIVLEELRK
IPI00274512	Vsig4	VSIG4	v-set and immunoglobulin domain containing 4.	0.81	TPESVTGTWK							6.44593	5.64195
IPI00129240	Vtn	VTN	vitronectin precursor.	1	CQCDELCTYYQSCCADYMEQCKPQVTR+EPQFISR+FEDGVLDPGYPR+GQYCYELDETAVRPGYPK+IYVTGSLSHSAQAK+KCQCDELCTYYQSCCADYMEQCKPQVTR+LIQDVWGIEGPIDAAFTR+NWHGVPGKVDAAMAGR+QYWEYEFQQQPSQEECEGSSLSAVFEHFALLQR+RVDSVNPPYPR+SIAQYWLGCPTSEK+SSDGAREPQFISR+VDSVNPPYPR	17.1395	34.9208	8.62723	11.9084	45.5522	99.4548	1.73525	1.28724	YES
IPI00798576	Vwf	VWF	isoform 1 of von willebrand factor precursor.	1	CLPTACTIQLR+HIVTFDGQNFK+ILCTCATGPECACPVLLEYAR+LQQVEDLSTMATLGNSFFHK+LVLAPYVGENMEVSIYGAIMYEVR+QHSDPCSLNPR+SIEIKHAGVSAELHSNMEMAVDGR+SQEEVDIHYCQGK+SQGECCGR+SVMVDLCTTCR+TCAQEGMVLYGWTDHSACRPACPAGMEYK+VEDAVFVQQR+WAVPENPCLVNECVR							3.47837	2.43785
IPI00312664	Wbscr17	WBSCR17	isoform 1 of putative polypeptide n-acetylgalactosaminyltransferase-like protein 3.	1	DWWDAGDPSLPIRTPAMIGCSFVVNR+DWWDAGDPSLPIRTPAMIGCSFVVNRK+QLNGLSKSLGLIEGYGGR+TPAMIGCSFVVNR+WNFIQNGAIMNK
IPI00173110	Wdr45l	WDR45L	wd repeat domain phosphoinositide-interacting protein 3.	0.83	FQVPSGSPCICAFGTEPNAVIAICADGSYYK+GTLIRIFDTSSGHLIQELRR
IPI00670387	Wdr67	WDR67	similar to wd-repeat protein 67 (protein 4-b-3) isoform 18.	0.82	DQEIAATAKDLEIR+EVEVLNAMMEEEAQK
IPI00652498	Wdr81	WDR81	isoform 3 of wd repeat protein 81.	0.94	EAGLLAAVTLTQK+EAGLLAAVTLTQKIIVYLSDTTLMDILPR+KIIPNHELVGELAGLYLESMSPSSR
IPI00139795	Wdr89	WDR89	60s acidic ribosomal protein p2.	1	LASVPAGGAVAVSAAPGSAAPAAGSAPAAAEEK+LASVPAGGAVAVSAAPGSAAPAAGSAPAAAEEKK+NIEDVIAQGVGK+YVASYLLAALGGNSSPSAK
IPI00119051	Wfdc2	WFDC2	wap four-disulfide core domain protein 2 precursor.	1	CCQAGCSSVCSKPNGPSEGELSGTDTK+EKQGTCPSVDIPK+LGLCEDQCQVDSQCSGNMK+QGTCPSVDIPK	47.6391		70.6687				22.6387
IPI00308245	Xlkd1	XLKD1	lymphatic vessel endothelial hyaluronic acid receptor 1 precursor.	1	GVLIWNAPSSQK+IMGVALVGR+MLGLTLASR+NPQMNFTEANEACK+SGFETCSYGWVGEQFSVIPR+TIKNPEEAK
IPI00122491	Yipf3	YIPF3	protein yipf3.	0.93	DIPAVLPAAR+LPVAVINATAK+LREEEVDADAAAAEEEDGEFLGMK+VVEGILDTLEGPNIPPMQRVPR						6.04896		6.75141
IPI00116498	Ywhaz	YWHAZ	14-3-3 protein zeta/delta.	0.98	SVTEQGAELSNEER	0.450017	0.490144	1.51983	0.873082	0.986681	0.217318	1.54998	1.12791
IPI00352528	Zan	ZAN	zonadhesin precursor.	0.99	CMTPCPASCAK+DAHGALIPEDK+DGSSNCTNIPLQCPAHSR+DLKDGSSNCTNIPLQCPAHSR+EGCICQSGYVLSNNK+EGCVCEPDYVMLNNK+EGCVCQPGYLLNKDTCVHK+GCTQSCACVEGNIQCQNFQCPPETYCK+GCTQSCACVGGAVQCHNFTCPTGTQCQNSSCSK+GCTQSCVCTGGSIQCLSSQCPPGAYCK+GCTQTCACVTGTIHCR+KNPPSCDAALGSTMSGPK+LCGFCGNYDGDSSNDNLK+LLLGSPAGSSPIPLWNR+MSAMTATCQDAGYPVKPWR+NPPSCDAALGSTMSGPK+NTQGAFISADKTWISRGCTQSCTCPAGAIHCR+QGVGPAEDFSNPGNGYYMLLDSTNARPGQK+TTGPSLTGTSGPPGGYP…
IPI00421162	Zc3h11a	ZC3H11A	zinc finger ccch domain-containing protein 11a.	0.85	AEEPSGADDSPSGTK+LSVGGDSDPPLKR+QGEGSSGVSSVLQQPQPNPGPEK+RSEIPCYWENQPVGCQK+VAGKPVLTAVSGVTR
IPI00648042	Zcchc11	ZCCHC11	zinc finger, cchc domain containing 11.	0.89	CIAIEDPFDLNHNLGAGVSRK+ENVKQTESQQTGKK+KELSQCICIGTPDGAESAGTDCR+KSALYIDVESDFHAK+MDDFQLKGIVEEKFVK+QGDLTPSETSLKK								41.2599
IPI00606056	Zfhx2	ZFHX2	zfh-5.	0.97	CLVCQAFSTDSLELLLYHCSIGR+CYDLAPAPETPLAPK+EGGGAMGTPSLLALGDGASYGSISPLHLR+GSLPPAVPVGRR+KMLDCISEEVGLKK+KNACEGGPVTAGGASGGASGCR+KNACEGGPVTAGGASGGASGCRR+NACEGGPVTAGGASGGASGCR+NACEGGPVTAGGASGGASGCRR+NPVVSGTSSVTGTPLK+SPPPETSSSSTSDPVTK								1.93785
IPI00466236	Zfp238	ZNF238	zinc finger protein 238.	0.91	DLAAEPGNMWMR+SKPAADVNVPTCSLCGK+TFSCMYTLKR+TVASPCSSTESLSQR+VQVEGGMENSLLPYVSNILSPAGQIFMCPLCNK
IPI00228959	Zfp276	ZNF276	adult male testis cdna, riken full-length enriched library,clone:4932443f20 product:zinc finger protein (c2h2 type) 276, fullinsert sequence.	0.87	AHNLNVHMSMVHPLTQAQDR+CPYQGCTAVYR+GRPSRSGGTSADGAAAQLSWGSMTR+LLGVAVHQDPALPQSVCK+SCGDTGDDGTDEAGAGR+VGVQPTTVAEEGACVADLIASSPR
IPI00131408	Zfp292	ZNF292	similar to zinc finger protein 292 isoform 4.	0.86	GHECLNEAQNSLSNSESLK+LENDTSAPASQSMLMNK+LKIKRPYGR+LSFTTYLSYVVHLEVDHGIGTR+QPSLLASMILSTSAVNMQQPQQSNFNPETCFK+VPAATGDAALANATVIPEK
IPI00311289	Zfp503	ZNF503	zinc-finger protein nolz1.	1	EPGGGGGGGGGGGGGGGVAAEK+KEPGGGGGGGGGGGGGGGVAAEK+KEPGGGGGGGGGGGGGGGVAAEKSGFR+LSSVASNGGGAGGAGNGAGGDK+LSSVASNGGGAGGAGNGAGGDKDAK+MSTAPSLSALR+TGSPSSSASACSPGGMLPSAGGGPEGK+VPSATCQPFTPR
IPI00221926	Zfp646	ZNF646	zinc finger protein 646.	0.91	EACFLDDLGTPGDECNETGFCGGLPGMDSDR+GPQAGMAEVGPPGPGK+KEQHDPVGMEAAFHGDEEHACK+KSHQTGIYPCSICSK+QDSGTGEVATLPPGGAWTLK+QLANHQRVHAERR+RSTDPGTEGSPSPVK+TRGPQAGMAEVGPPGPGK
IPI00378681	Zubr1	ZUBR1	isoform 1 of zinc finger ubr1-type protein 1.	0.95	ACAEIAAQRTINWQKFCIK+AMEEFFSDGGELVQIMMATANEDLSAK+EDGSCLALVKR+EVQMNFLNQLTSVFNPR+FLSRPALPFILR+GALDNLLAQLIAELGMDKK+GVEMTDQLMVPTLGSQEGAFENVR+KLSLFIGASVDPAGVTMIDAVK+LHGFAAVLAIGSSR+LLASLFQDLQVEALHK+MPGNPYSSNEPGIGPLMR+MQSSGIPDGGHIR+NSFIRSYLSASLSEHHMATLASIIKEVDK+QGMKPEHAGSLIELAASK+SFAATVSR
IPI00340123	Zzef1	ZZEF1	zinc finger, zz-type with ef hand domain 1.	1	EAAAALRPAPPCESLVSR+EECICAQTLLLK+EGLGIHSSMILR+ILGLLAAMLPPIK+KLCSDPEGGLSK+QLQACSLVPGFIDIFSESK+QMLSEERVVPHLALGK+QSLQLTFHSLCTYFSDK+RAADTEVRPLDYK+SDLATMNTSEVLAVMNTLLSVAAR+SQCMQLVGDCLMK+SVHQLGSNMAVSQAK+WQPSRSLR
IPI00108762			similar to smt3 suppressor of mif two 3 homolog 2 isoform 3.	0.8	VAGQDGSVVQFK									YES
IPI00112407			similar to ribosomal protein s14.	0.92	IEDVTPIPSDSTR									YES
IPI00116718			18 kda protein.	1	IEINFPAEYPFKPPK+NIQVDEANLLTWQGLIVPDNPPYDK+TDQVIQSLIALVNDPQPEHPLR									YES
IPI00131114			similar to alpha 3 type vi collagen isoform 3 precursor isoform 2.	1	AEQGSGPVSGEK+DIVFLVDGSSSLGPSNFNAIR+FWYGGCGGNENR+GELGEIGLDGLDGEEGDK+GPIGSIGPK+GTPGEPGADGPPGPKGIR+IAEGVPQLLIVLTAEPSGDDVR+LLWHYDLESK+VMLSFGPSGATPQPPGVDLPSPSRPEK+VMLSFGPSGATPQPPGVDLPSPSRPEKK									YES
IPI00138175			ig kappa chain v-iii region pc 7175.	0.88	DIVLTQSPASLAVSLGQR									YES
IPI00169625			similar to ig kappa chain v-ii region rpmi 6410 precursor.	0.95	FTGSGSGTDFTLK+FTGSGSGTDFTLKISR									YES
IPI00343008			similar to rho guanine nucleotide exchange factor 5 isoform 1.	0.89	DGIVFSDSSTALFALK+EGMGGFSR+LIAVVGHSIPKR+RGGLAWLGTAAGAR+VGRRGGLAWLGTAAGAR									YES
IPI00345747			novel protein.	0.97	AGSLQAPYTTEDLIK+GVPVLDLYLAQQAEK									YES
IPI00352763			similar to flj44048 protein.	0.99	ALVILKDSAQLVPAK+DPPTMSNTQLISK+DPPTMSNTQLISKAILENVLAK+EELLSNVDICSVASEIVENMLEK+ELSDAEIK+EMQPFITKAKR+ESDSSLSEGMVSDEEEVVLGEVVGDQCLRK+ETSMQISGALK+GKTIILSANVSFR+INVVEDIVQAILGNLETFAASK+IVHSCVCNIFK+KVSNGILK+LSKEHVSEMPRSSISK+LYFPSAHKGCIAK+MVDSVYSNILQMSSSVDSIQKNIISR+NKLDKEISQMEPSPVSILK+RAAAELDMPSCK+SQEKPASITDVMLDSR+TLSKIEVKLK+TVPESLDIDNLSFASTMEEMAK+VASLIVDGVSSVPSCR+VLAKVSSTLSKVFSR+VLAQLISLPIK+VVKIIDELKSQEK…									YES
IPI00378671			similar to 40s ribosomal protein s2.	0.87	DPGLGGFR+EWIPVTK+LLMMVGIDDCYTSAR+MSDDAGTAGGPGGPR+QVATAIRVAIILAK+VAIILAKLSIIPVQR									YES
IPI00381256			loc207685 protein (fragment).	1	ATLVCTITDFYPGVVTVDWK+FSGSLIGDK+HSSYSCQVTHEGHTVEK+VDGTPVTQGMETTQPSK									YES
IPI00381881			complement component 7.	1	CGEDLQWLVGEMHCQK+DDGKSCLGETTESK+DGFVQGEGTMVPVGQSVVYACDEGYSLIGDPVAR+EASECQTAGYR+EETMSECEAGILR+ESCTLPSPAEK+GGDSGFVADLSFLDLDNPAGNK+GQSISITAIKPCAEEAAQ+ICVEVNGKEETMSECEAGILR+ILSLTICK+LIDQYGTHYLQSGSLGGEYR+MPYECGSSLDVCAR+QCEDQDLEK+SCLGETTESK+SVAVYGQYGGYPCEGSAFETQSCKPER+VCGACPIWSK									YES
IPI00409405			similar to cofilin-1 (cofilin, non-muscle isoform) isoform 1.	0.94	AVLFCLSEDKK+EDLVFIFWAPENAPLK+KEDLVFIFWAPENAPLK+LGGSAVISLEGKPL									YES
IPI00457400			ig lambda-1 chain v region s43 precursor.	0.97	FSGSLIGDK+SSTGAVTTSNYANWVQEKPDHLFTGLIGGTNNR									YES
IPI00458295			pregnancy-associated mouse protein pamp1.	1	LMLDSGSEPK									YES
IPI00458368			meningioma 1.	0.81	AECAVGASGAQNGDSELGSCCSEAVK+DSGHVSPGTFFDK+KAECAVGASGAQNGDSELGSCCSEAVK+QATPHSAPGVNSPPSAGSGSSGAGGGAYPPQPDFQPSQR+RMGGAGLPTDCGPHDPALAPPPAPGGSGVLFR+RPPPPDFPAPALGGQPGFPFGSGSR+YSTAPDSGGAPGVSPGQQQAPGSAAGGSSVNEAR									YES
IPI00459122			hypothetical protein.	1	DSQTLVSLHCSPTNFDKPDSRPIAFCFPSASRR+GGSAFPQVGGGGAGSGEAAAR+GGSAFPQVGGGGAGSGEAAARR+RGFRSSAVAATFK+RGGSAFPQVGGGGAGSGEAAAR+RRWGPAVAPVASPPGR+RWGPAVAPVASPPGR									YES
IPI00459307			anti-myosin immunoglobulin heavy chain variable region (fragment).	0.96	WASWFAYWGQGTLVTVSA+WMGWINTETGEPTYADDFK									YES
IPI00461249			similar to 60 kda heat shock protein, mitochondrial precursor.	1	DPGMGAMGGMGGGMGGSML+EEKDPGMGAMGGMGGGMGGSML+IQEITEQLDITTSEYEK									YES
IPI00462809			anti-colorectal carcinoma light chain.	0.95	ADAAPTVSIFPPSSEQLTSGGASVVCFLNNFYPK+ASQDINSYLSWFQQKPGK+DSTYSMSSTLTLTK+DSTYSMSSTLTLTKDEYER+MTQSPSSMYASLGER+QNGVLNSWTDQDSK+QNGVLNSWTDQDSKDSTYSMSSTLTLTK+RADAAPTVSIFPPSSEQLTSGGASVVCFLNNFYPK									YES
IPI00464378			ig kappa chain v-ii region 26-10.	0.95	DVVMTQTPLSLPVSLGDQASISCR+FSGSGSGTDFTLK									YES
IPI00467235			612 kda protein.	0.98	ADAGLYTCVASNVAGVAKK+AENGTCIDIDECK+CNMQACPGGPQR+CVVHCGTGFRR+DAGTYACLASNAAGTDK+DGQILLEDEHHK+GLTIAADGR+GNPVPQITWHK+IEDAQAGDTGR+ILQLKNVHVSDTGR+LDNMPVFSRPFSVSFISQLR+LELLSISGGSLK+LTVYVPPSIK+MIPDSTNVEILTGGQTLHIRR+QSVTLTCEVR+RYDLSVHAPPSIIGNHGVPENVSVVEK+TGALFISNLWASDKGTYICEAENQFGK+VSDSGMYLCVATNIAGNVTQSVK+VYEEIASTSSGQVFHLDK+YTCVASNVAGTNNK+YVCVAVNVAGMTDK									YES
IPI00468477			26 kda protein.	1	GEGEFWLGNDYLHLLTLR+GTAGDALVQGSVEEGTEYTSHSNMQFSTFDR+NNSPYEIENGVVWVPFR+VELEDWAGK+VGSEAEGYALQVSSYR									YES
IPI00474340			complement c1s-b subcomponent precursor.	1	FSPICLPGTSSEYNLSPGDMGLISGWGR+FYVAGLVSWGK+GDSGGAFAFQVPNVK+NQQFGPYCGDGFPGPLTIR+NYVDWILK+SPNSPIIEEFQFPYNK+TNFDNDIALVQLKDPVK+TQSNTLGIVFQTDLMGQK+VPVTSLETCK+WVNDQLGIELPR									YES
IPI00475142			novel protein similar to obscurin, cytoskeletal calmodulin and titin-interacting rhogef.	1	AAPVEWRKGSETLGDGGR+ADAGEYSCEAEGQK+AFEVWHEREDSVR+APKPKFKTDLQSTEQEAGGTAR+CETGDQGVYVCDALDAQTSASLRVQGR+CHEAGWLATTEFTITGVAEEGDFQFR+CHLAVQGPVHILTLSALQPQDSGLVAFR+DGTCSLLVTGLAPTDSGR+DLQVAPGTRLAK+DSGEYTCETEASKSTAK+EALISSFLQGTSQAVSAQMSESAGFADLVGQSK+EAVSVEWR+EDLGHYECELVNR+EDSGQYAAYISNAVGAAYSSAR+EHETIILTATIAAPSVAAVTWLKDGVEIR+ELQGCGTDDDVAMCFIK+EPTLDSISELPEEDSR+EQEGTESDEGQLPQVLEELKDLQVAPGTRLAK+ESATFQCEVAQPATEA…									YES
IPI00553586			similar to liver carboxylesterase n precursor (pes-n) (lung surfactantconvertase) isoform 1.	0.89	AEEVAFWTELLAK+AISESSVVLGTNLR+APEEILAEK+DAGVSTYMYEFR+EGYLQIGATTQQAQR+ESIPPLFSEDCLYLNIYSPADLTK+FAPPEPAEPWSFVK+FWANFAR+GNWAHLDQLAALR+LGIWGLFSTGDEHSR+LKAEEVAFWTELLAK+MNEETASLLLR+MNEETASLLLRR+NGNPNGEGLPHWPEYDEK+NGNPNGEGLPHWPEYDEKEGYLQIGATTQQAQR+NIQAVTEMIATVSGCNDTSSTAMVQCLR+QEFGWIIPTMLGDLLSEGK+QKTENELLEITVK+SFSTVPYIVGFNK+SLRDAGVSTYMYEFR+YRPSFVSDK+YTSLEGFEHPVAVFLGVPFAKPPLGSLR									YES
IPI00622925			125 kda protein.	0.8	DQVSFVSLIEDLKR+EDAAATKECCKQLTQK+MVEHEAAQQDLQSK+QLTQKMMTKNER+TMMFSEDEALCVVDLLK									YES
IPI00624403			32 kda protein.	1	WGDAGAEYVVESTGVFTTMEK									YES
IPI00649880			adult male testis cdna, riken full-length enriched library,clone:4933417i20 product:aldolase 1, a isoform homolog.	1	ADDGRPFPQVIK+CPLLKPWALTFSYGR+FSNEEIAMATVTALR+GVVPLAGTNGETTTQGLDGLSER+QLLLTADDRVNPCIGGVILFHETLYEK+VDKGVVPLAGTNGETTTQGLDGLSER									YES
IPI00659366			similar to liver carboxylesterase n precursor (pes-n) (lung surfactantconvertase) isoform 1.	1	AEEVAFWTELLAK+AISESSVVLGTNLR+APEEILAEK+DAGVSTYMYEFR+EGYLQIGATTQQAQR+ESVPLLFSEDCLYLNIYSPADLTK+FAPPEPAEPWSFVK+FWANFAR+GNWAHLDQLAALR+LGIWGLFSTGDEHSR+LKAEEVAFWTELLAK+MNEETASLLLR+MNEETASLLLRR+NGNPNGEGLPHWPEYDEK+NGNPNGEGLPHWPEYDEKEGYLQIGATTQQAQR+NIQAVTEMIATVSGCNDTSSTAMVQCLR+QEFGWIIPTMLGDLLSEGK+QKTENELLEITVK+RPQTVEGDHGDEIFSVFGIPFLK+SFSTVPYIVGFNK+SLRDAGVSTYMYEFR+YRPSFVSDK+YTSLEGFEQPVAVFLGVPFAKPPLGSLR									YES
IPI00661304			similar to complement c4 precursor isoform 1.	1	AGVQSSVHCVYLAKWQAGAVWHGHR+APHIQLVAQSPWLR+CCQDGMTK+DQFQAALDK+EELVYNLDPLNNLGR+EGAIHREELVYNLDPLNNLGR+EIFTSTSIFQDAFTIPDISEPGTWK+EPFLSCCK+FAEDLRR+FALMDEQGK+FALMDEQGKR+FVSSAFSLDLSR+GHIFVQTDQPIYNPGQR+GLCVAKPTR+GTGFLSIEPLDPR+GVFDLGDAVSK+HLVPGAHFLLQALVQEMSGSEASNVPVK+ITPWKPYILMVPSNSDEIQLDIQAR+KEIFTSTSIFQDAFTIPDISEPGTWK+KYVLPNFEVK+LGQYSSPDAK+LLTVWLPDSMTTWEIHGVSLSK+LLVSAGSLYPAIAR+LSSGDDFVLLSLEVPLEDVR+LTVQAPP…									YES
IPI00661771			similar to dynein heavy chain domain 3.	0.84	CQALADNAQKDLEEALPALEEAMR+FIEPPVLNMK+GMVDYGSGGLGQGVDK+GTEEVFQALEDNQVALSTMK+HSTMIVGGTGSSK+IQAQISSGMTNNASLLQNYLK+KVCECQYHFAR+LGMDQHVEK+QWMYLENIFLGEDIRKQLPNESALFDQVNNNWK+RGMVDYGSGGLGQGVDK+SYGRPPAQVEIVMQAVMILR+VAFCVTSFIVSNLGSR+WIKNMEGNQGLK									YES
IPI00664562			similar to ec1-v2r pheromone receptor.	1	NSVGDDVVLDWKR+QLSMSEYMINWPIGFTEIPHSVCSESCNPGFR+QLSMSEYMINWPIGFTEIPHSVCSESCNPGFRK+WLLTSQVPK									YES
IPI00665496			hypothetical protein.	0.91	EPFDTMSPLLLK+LLSMLGAIR+SDWYSSVMLPIDVPAPLEDLPEEDR+TTYVQFYPAPAK+YFQINFEK									YES
IPI00665741			similar to putative pheromone receptor.	0.81	HIFDLSMNAESTSIYNGVYAVAHSLHEIR									YES
IPI00666030			similar to ig kappa chain v-v region l6 precursor.	0.97	MTQSPSSMYASLGER+TLIYYATSLADGVPSR									YES
IPI00667180			similar to msx2-interacting protein.	0.88	QPAEPLGAAMTTK+RPMSAVYSEYSESSKPGSGGVAVTGK+RPMSAVYSEYSESSKPGSGGVAVTGKVPPTPPEKTWVR+SGLPLWAPPHSAPGENCPSPSAVPAGSR+VATEQSTAEHQGPER+VQESPSSRPERAPGLTEVK									YES
IPI00668076			synaptic nuclear envelope 2.	0.86	DPTAPAVKHR+ESLMALNSSEGK+FSEDQHPSTLK+IERINNGLHCVEKMLQQK+KMEMDLGQSIFPLPR+LKLCAEENSRLQEALQNMLLELQPR+LMSDAEKPVLNQER+LQQPLCVNLGVQHIQHEK+MEMDLGQSIFPLPR+NTMAELVVPIALLPDNILSQIRK+QEELQSSVADLRSLTETLGAISSPEAKEQLR+VPSMSPESTLLNAQTLIQK+WLSLLEAAR									YES
IPI00668344			similar to glyceraldehyde-3-phosphate dehydrogenase.	1	KVVKQASGGPLK+LVINGKPTTIFQER+RVIISAPSADAPMFVMGVNHEK+VIISAPSADAPMFVMGVNHEK									YES
IPI00673290			similar to glyceraldehyde-3-phosphate dehydrogenase.	0.97	DMLGYTEDQVVSCDFK+LISWYDNEYGFSNR									YES
IPI00674460			similar to retinoblastoma-binding protein 6 isoform 2.	0.97	AVNDSSAPMSLAQLIETANLAEANASEEDK+DPNMKGAMLTKTGQYAIPTINAEAYAIGK+INAAHPGGGQPGWAHSNK+NFMMEVKDPNMK+QAINNFK									YES
IPI00674945			similar to kinesin-like motor protein c20orf23.	0.99	AHGQSQEVQSK+ASGDVSTTHTPLGGSVMPVVVR+ASPKSGAVHPEAPGNVGAEANIRHPVK+EAWGFDHSHQASQK+EDMVSSTQK+EGTCGTYK+GLVASVNTK+ILHGQGQLTAR+ITAATHVHEASSR+MGVGVNVLLPK+NSSLDRISR+QALMEHYGVDINRK+QDHVQGLDASTGLEETK+RLPQLHSDFMNWDPSAMSPPVPELTHQMPEK+RVNNTDEMAR+TYTMLGTPASVGLTPR+VGEALGSSGSLEWLDLDGDVSASR+VVKTFQAESKPSPSSRASK									YES
IPI00676287			similar to stretchin-mlck cg18255-pa, isoform a.	0.98	ALFEHLPVPGDEGIDMETLIGAVK+ALPDIVEEMGLELTDK+EFGDLTDTLTGTSDGK+EFGDLTDTLTGTSDGKVK+ELGIEDEK+ELLEHLPITSK+ELQDLDETVSIDEEGNVDLK+EVSQSLPADASGMISLQTMLK+GEAIDMDDVEDIMEDLGIEFTDK+LSSTLHSAASTIK+MLPVDDNGMVHWNRVLK+NMGMKLSDMEYK+NMGMKLSDMEYKDMIK+NVLENMGLEYKDQELSK+QILENLATR+QNLPASASGK+TDGPQINASDIQPYLETVGIELTSSESQLLQSR+VLEGMGIQLSNR+VMEIIKATTGGEVDSK									YES
IPI00678555			similar to spectrin beta chain, brain 4.	0.96	ATIEVMESGSPESR+DQADAEALLLQHLR+ELEEQARAAAALVSHMSISATR+GLQAEMATQGTPCSPVK+GLQAEMATQGTPCSPVKIQYMLEEHR+IQQQQEDLK+KHQMLQQEVALYWSSMEDLEQR+LLQATQGHTFLGSCR+LLQLERLDTLARR+QGEELLSQSHPQAGEVSQR+QLMETAVLDRDLTQIATALQK+VQELCPGAQALAAVQQK									YES
IPI00749714			similar to mitogen activated protein kinase kinase kinase 5.	1	EEVVVEETESVQGSCCGAER+ELQALLHQAIEEKDQEIRHLK+FHYAFALNRR+GAVAAPSAANAWR+GRGNSGSGGGR+HACCHGASSATR+NIVQYLGSFSENGFIKIFMEQVPGGSLSALLR+NLMESLAQGAEEPKLK+RGEPPPGSGVAPGDR+RPQAITEDAVATSGVSTLSSTVSHDSQNAHR+SIVETILIYKHFVKLTTEQPSAK+TGGCETVAGTR+VAERTGGCETVAGTRR+VYCCDSSFMK									YES
IPI00751261			similar to cdna sequence bc022224.	1	AEPGPEAGPIVGGSR+CDLSNEEDILSMFSAVR+LHDKDPGEAAATYEHIK+MTDACKNPSCMRDK+SQHSGVDICINNAGMARPDTLLR+TVGNIEELAAECK+YAVTALTEGLR									YES
IPI00751422			similar to alpha-1-antitrypsin 1-2 precursor.	0.98	DQSPASHEITTNLGDFAISLYR									YES
IPI00752497			similar to alpha-1-antitrypsin 1-4 precursor.	0.91	IFNNGADLSGITEENAPLK+IFNNGADLSGITEENAPLKLSK+MSPLGITR									YES
IPI00753929			similar to cytoplasmic beta-actin.	0.98	CPEALFQPSFLGMESCGIHETTFNSIMK+DSYVGDEAQSK+IWHHTFYNELR+LCYVALDFEQEMATAASSSSLEK+MTQIMFETFNTPVPIYEGYALPHAILR+VAPEEHPVLLTEAPLNPK									YES
IPI00756252			290 kda protein.	0.97	CLTSGSQGHK+DGLCVGIVTSER+EDYQLVILCDAAR+ELIESAEGICSSDR+IIVADAMQGQAAFSELFR+ITFAEVDAIFK+KLNEAVIK+KLPQQLLSEPSLMGK+RGSVEAETMK+TVKESHGSVELSSLSLATAINSR+VFVDLASISAGENDIDVDR+YSPADVFIGYHSDACASVVLQAVER+YVDLGLGTHR									YES
IPI00756257			titin.	1	ACRPIKPPGPPINPK+AEGFINLQVIDVPGPVR+AEPTPSPQFPFADMPPPDTYK+AGEAFKLEADVSGRPPPTMEWTK+AGPGKPSDASK+ALDPFTTPSPPTSLEITSVTK+ALLLSQSLAEGCVESLEVPDVAVSNMR+ALPQEAAIETTAISSSMVIK+ALTTFVGK+ALVGGTAPMTIK+ASINVLDLIIPPSFTKK+ATNDVGSDTCVGSVTMK+AVNEAGVSKPSATVGPVIVK+CGCVATHLLK+DIEQTVGLPVTLTCRLNGSAPIQVCWYR+DIETMEK+DSGDYTITAENSSGSKSATIK+DSGTYTCTASNEAGSSSSSAAVAVR+DSGYYSLTAENSSGSDTQK+DSMTISWHEPLSDGGSPILGYHIER+DTIVVNAGETFR+DV…									YES
IPI00756358			similar to murinoglobulin 1.	1	AHFSVMGDVLSPAIK+DGSYSAFGDQNGER+DLFQCVSFIIPR+EGNTWLTAFVLK+ESVVFVQTDKPVYKPGQSVK+FCIDTDGFSGSSLHIK+GGVDDEMTLSAYITMALLESSLPATHPVVSK+HGIPFFVK+KSEHHLYKPQASSAEVEMNAYVVLAR+LQVTASPQSLCGLR+MLIYTILPDGEVIADSVNFEIEK+MLLIIGGYAYPLILR+MLSGFIPLKPTVK+NKESVVFVQTDKPVYKPGQSVK+NLRPLNELFPLAYIEDPK+NLRPLNELFPLAYIEDPKK+NTQNLLHMPYGCGEQNMVLFAPNIYVLK+SLDEEAIKENNSIHWK+SLGNVNFSVSAEAQQSPEPCGSEVATVPETGR+YMVLVPSQLYTETPEK									YES
IPI00761249			55 kda protein.	1	CDNGFSPPSGYSWDYLR+CTAQGWEPEVPCVR+CTLKPCEFPQFK+CTLTGWIPVPR+CVFHYVENGDSAYWEK+ERGDAVCTGSGWSSQPFCEEK+GDAVCTGSGWSSQPFCEEK+GDAVCTGSGWSSQPFCEEKTCSPPYILNGIYTPHR+IYVQGQSLK+KCVFHYVENGDSAYWEK+LDYECLVGFENEYK+LNDKLDYECLVGFENEYK+LYYEESLRPNFPVSIGNK+QGYVTNTGEISGSITCLQNGWSPQPSCIK+SCDMPVFENSITK+TCGPPPPIDNGDITSLSLPEYEPLSSVDYQCQK+TCSPPYILNGIYTPHR+VENGDGINVKPVYK+VENGDGINVKPVYKENER+VQCYNGYSLQNGQDTMTCTENGWSPPPK+WSEPPTC…									YES
IPI00762198			6 kda protein.	1	AAVSGLWGK+AAVSGLWGKVNADEVGGEALGR+LLVVYPWTQR+VNADEVGGEALGR+VNADEVGGEALGRLLVVYPWTQR+YFDSFGDLSSA									YES
IPI00762617			similar to fc fragment of igg binding protein.	1	AAGGQTLLTPAEASCQGIQCASGQR+CQMIDNQR+CTCDGATQK+DILCQALAAYAAACQAAGIK+DVCGLCGNFNGNPDDDLALK+LLAPGQEVFDDDR+LPASLSEGR+VDLPATVLTSVSVR+VLADVQPCHNNDK+VLIDGVLQYLPFQAAGGK									YES
IPI00762874			msin3a-binding protein.	0.98	LVEPSCGPGVSLSNR+MSPLPLR									YES
IPI00808023			hypothetical protein loc76639.	0.93	MQNLQIDASFHNIPLHK									YES
IPI00808263			hypothetical protein loc73309.	0.95	RSQNSNSDSPLPGTSQDPGPSPCSLPK+RSQNSNSDSPLPGTSQDPGPSPCSLPKR									YES
