# Supplementary material for: Integrated Proteomic Analysis of Human Cancer Cells and Plasma from Tumor Bearing Mice for Ovarian Cancer Biomarker Discovery
Source: PLoS One. 2009 Nov 19;4(11):e7916. doi: 10.1371/journal.pone.0007916 (PMC2775948; doi:10.1371/journal.pone.0007916)
Supplement: Table S2 — Proteins increased at least 1.5-fold in plasma taken from K-ras/Pten mice compared to controls, appended with ovarian cancer cell-derived proteins assayed in human plasma. P-value for all mouse plasma ratios <0.05. The table summarizes fold difference for each protein. In addition, the ratios of secreted protein/total extract and surface protein/total extract in human ascites derived tumor cells/cancer cell lines [15] are shown for comparison for each upregulated protein in murine plasma. *Indicates cancer-only peptide(s) also observed. ELISA p-values and coefficients from logistic regression for proteins assayed in human plasma are summarized. (0.06 MB XLS) [file pone.0007916.s007.xls]

## Sheet: Sheet1
Table S2.
		Secreted/Total Extract Ratio				Surface/Total Extract Ratio				ELISA SET 1*: Logistic Regression		ELISA SET 2**: Logistic Regression
										All Cases		All Cases		Early Cases		Late Cases
Gene Name	Mouse Plasma Cancer/ Normal Ratio	Ascites	OVCAR3	CAOV3	ES2	Ascites	OVCAR3	CAOV3	ES2	Coefficient	p-Value	Coefficient	p-Value	Coefficient	p-Value	Coefficient	p-Value	Reference* to Prior Studies in Human Ovarian Cancer Plasma/Serum (Healthy vs. Cancer)
Mouse + Cell Line
Thbs1	2.12*	50.5675	36.5069	135.361	52.1443	3.87571	6.65346	-	19.9418	3.47893	0.0013037	-0.125979	0.915016					1
Timp1	5.20267	20.9864	52.6464	642.948	231.187	-	-	6.34234	11.0979	1.3267	0.000303111	1.21371	0.000629738	0.744926	0.0400418	1.81923	6.92885e-06
Nov	3.36*	28.2621	17.1395	25.8817	8.42537	-	-	-	13.6224	0.166578	0.581386	0.049441	0.450779
Rarres2	3.07*	13.3919	23.5953	145.314	-	-	-	9.01351	-	1.02656	0.00218881	0.876799	0.000432858	0.546223	0.0157526	1.30379	0.00013134
Dkk3	2.29888	-	33.279	75.6451	156.933	-	-	-	38.8672	-0.347421	0.24455	0.20826	0.245487
Igfbp2	1.88*	20.2135	165.123	45.787	15.8507	-	-	-	-	2.18797	3.06472e-07	3.28431	2.35363e-05	3.06452	0.0011676	3.5682	1.99335e-09	2, 3
Lcn2	3.10175	3.12034	10.7407	70.1687	-	0.82004	-	1.83558	-	0.389124	0.224091	1.53832	0.133207					4, 5
Grn	1.88*	1.91463	14.6922	45.787	8.53376	-	-	-	0.288046	0.595307	0.0465914	0.465469	0.00204713	0.448654	0.0088295	0.487188	0.00869335
Tgfb1	1.98549	-	-	5.97634	-	-	-	-	-	0.509307	0.165685	0.246363	0.347473
Vcam1	1.58338	5.95675	-	-	-	-	-	-	-	-0.116987	0.699683	-0.130607	0.4747					6
Clu	1.88848	5.65242	32.7488	7.96451	-	4.51356	13.3025	3.17117	11.0979
Fbln1	1.51*	4.21756	62.3301	563.326	30.7015	4.09463	-	145.243	48.9651
Itih2	2.11394	1.68702	49.4185	45.287	67.8284	-	108.416	5.84234	79.2589
Tnc	12.7506	85.2647	26.8232	-	283.164	42.6978	-	3.67117	435.211
Apob	2.12278	16.6366	4.2279	-	-	20.2823	6.65346	94.4909	245.875
Fasn	3.66156	2.0327	1.0101	0.852505	0.298359	2.063	3.51582	2.34096	2.31881
Pros1	2.08*	23.3054	46.1906	20.9054	-	-	-	6.34234	3.52448
Cnbp	3.59*	4.03744	10.6837	15.929	2.38293	0.553672	-	-	-
Ahsg	1.77*	0.595675	101.065	15.929	38.1269	-	-	-	43.9162
Igfbp4	1.84*	3.17405	136.572	30.858	30.7015	-	-	-	-
Fstl1	1.59264	18.3486	24.6586	175.172	134.657	-	-	-	-
Ctsz	2.22537	0.574394	-	28.5326	-	0.128308	-	3.89489	4.5408
Cfh	1.92*	0.751392	81.6975	45.787	-	0.105491	-	-	31.2938
Serpina3n	1.5946	0.365958	-	-	-	0.525424	12.3069	3.67117	18.6714
Ctgf	3.65554	1.48919	42.9627	-	50.9151	-	-	-	13.6171
Wfdc2	8.78*	22.6387	47.6391	70.6687	-	-	-	-	-
Fbln2	8.32288	13.3919	-	70.6687	-	-	-	14.3558	-
Lrg1	3.31*	3.47837	17.1395	40.8107	-	-	-	-	-
Mmp2	3.10167	-	4.2279	-	142.082	-	-	-	36.3427
Plxdc2	2.21714	3.47837	30.0511	5.97634	-	-	-	-	-
C9	1.68*	2.23198	4.2279	-	-	-	-	-	3.52448
Sirpa	1.62514	5.95675	10.6837	-	-	-	-	-	6.04896
Lyz	1.61079	2.27012	4.2279	-	-	-	-	-	6.04896
Cfl1	1.96018	1.1945	1.43615	2.04298	2.79285	0.356423	1.6556	0.821538	0.702566
Ctsb	1.69614	0.976009	1.19487	1.20492	4.06374	0.22948	0.346788	1.29161	2.25059
Ctsd	1.89891	1.41806	0.55465	4.31853	-	0.716156	0.676237	1.05825	2.85781
Atox1	2.03985	1.73919	3.3529	1.82545	3.03682	-	-	-	-
Itih4	1.69*	0.610394	-	-	-	0.314972	12.3069	-	46.4407
Ctbs	2.27808	1.19135	-	20.9054	-	-	-	9.01351	-
Ifi30	1.99664	0.266183	2.13674	15.929	-	-	-	-	-
Pcsk9	3.5628	-	-	692.711	-	-	-	252.09	-
Prg4	3.08557	3.47837	-	-	-	-	-	-	23.7203
Herc4	2.96156	-	-	-	-	-	-	3.67117	2.85781
Scotin	2.13596	-	13.9116	-	30.7015	-	-	-	-
Rnase4	2.07*	-	-	15.929	-	-	-	-	8.57344
Hc	1.949	5.95675	-	-	-	-	-	-	8.57344
Kng1	1.86*	-	30.0511	-	-	-	-	-	6.04896
Procr	1.55334	8.43512	-	-	-	6.75141	-	-	-
Eef1b2	2.45424	1.58702	0.536464	2.61736	0.902985	0.387571	0.585346	0.135969	0.177911
Ptges3	2.92695	1.07933	2.78673	1.43337	1.13881	-	0.455812	0.253694	0.971681
Mif	2.37262	2.52837	0.20913	1.00296	1.51841	-	0.332569	0.0487872	0.201632
Notch2	1.66*	0.869593	3.56123	-	1.05317	-	-	-	-
Marco	8.47*	3.88423	-	-	-	0.885593	-	-	-
Hagh	1.81109	5.95675	1.14263	-	-	-	-	-	-
Apof	2.12703	-	-	-	-	-	-	-	8.57344
C6	1.93885	-	-	-	-	-	-	-	6.04896
F11	1.72501	-	-	-	-	-	-	-	8.57344
Cfp	1.65*	2.10878	-	-	-	-	-	-	-
Cacna1c	Cancer Only*	-	-	-	-	-	6.7	-	-
Mouse Only
Ppbp	1.6739	-	-	-	-	-	-	-	-	1.18095	0.00722262	0.3028	0.568141
Tnfrsf21	2.86861	-	-	-	-	-	-	-	-	-0.036002	0.901221	-0.0591256	0.257913
Xlkd1	2.53846	-	-	-	-	-	-	-	-	0.221149	0.486303	0.253981	0.278511
Tpm4	4.93783	0.631121	0.794696	0.99542	0.529336	0.0738744	1.37683	0.463092	0.0607669
Ppia	1.52581	0.77022	0.540112	0.924192	1.99827	0.197589	0.812245	0.220062	0.190816
Prdx5	1.79562	0.389768	-	0.360437	1.4716	0.0870662	0.326552	0.477788	0.0979023
Vat1	3.12959	0.766829	0.693979	-	-	0.744479	1.02708	1.7027	1.84081
Stip1	1.99025	0.64197	0.443331	0.25692	0.783517	-	0.0695306	-	0.337976
S100a8	2.5776	0.388423	-	-	-	0.328202	1.66336	-	-
Hp	3.62*	0.23914	-	-	-	0.171913	-	-	-
Vasp	1.99899	0.397116	-	-	0.601812	-	-	-	-
Cd5l	3.32*	1.19135	-	-	-	-	-	-	-
Pglyrp1	2.49*	1.94211	-	-	-	-	-	-	-
3110003A17Rik	1.66825	-	0.28186	-	-	-	-	-	-
Apoh	1.56*	0.64197	-	-	-	-	-	-	-
Golph2	6.80315	-	-	-	-	-	-	-	-
Tnfrsf9	4.57488	-	-	-	-	-	-	-	-
Emr4	3.621	-	-	-	-	-	-	-	-
Il18bp	3.60313	-	-	-	-	-	-	-	-
Butr1	3.52676	-	-	-	-	-	-	-	-
Ngp	3.51*	-	-	-	-	-	-	-	-
1100001G20Rik	3.02*	-	-	-	-	-	-	-	-
Lyzs	2.81024	-	-	-	-	-	-	-	-
Ccl8	2.76*	-	-	-	-	-	-	-	-
Fgl1	2.64207	-	-	-	-	-	-	-	-
Ccl6	2.58*	-	-	-	-	-	-	-	-
Adamts2	2.57473	-	-	-	-	-	-	-	-
Hpxn	2.24855	-	-	-	-	-	-	-	-
Tff3	2.24316	-	-	-	-	-	-	-	-
Itih3	2.23481	-	-	-	-	-	-	-	-
Ambp	2.21*	-	-	-	-	-	-	-	-
Clec4f	2.12657	-	-	-	-	-	-	-	-
Camp	2.1068	-	-	-	-	-	-	-	-
Kng2	2.06*	-	-	-	-	-	-	-	-
Ccl9	2.00599	-	-	-	-	-	-	-	-
Fcna	2.00192	-	-	-	-	-	-	-	-
Cfhrc	2.00099	-	-	-	-	-	-	-	-
Fetub	1.85*	-	-	-	-	-	-	-	-
Pik3ip1	1.7873	-	-	-	-	-	-	-	-
Ang1	1.74756	-	-	-	-	-	-	-	-
Habp2	1.64*	-	-	-	-	-	-	-	-
Proc	1.64*	-	-	-	-	-	-	-	-
Mb	1.63227	-	-	-	-	-	-	-	-
Scgb1a1	1.62106	-	-	-	-	-	-	-	-
F9	1.60749	-	-	-	-	-	-	-	-
Postn	1.58807	-	-	-	-	-	-	-	-
Orm3	1.57007	-	-	-	-	-	-	-	-
Ly6a	1.55846	-	-	-	-	-	-	-	-
Eef1a1	Cancer Only*	0.6	0.4	0.5	1.5	0.3	0.9	1.5	0.6
Vcl	Cancer Only*	1.2	0.3	1	0.7	1.4		0	0.1
Fcgbp	Cancer Only*	-	-	-	-	-	-	-	-
Mmp19	Cancer Only*	-	-	-	-	-	-	-	-
Lyz2	Cancer Only*	-	-	-	-	-	-	-	-
Gapdhs	Cancer Only*	-	-	-	-	-	-	-	-
Cell Line Only
VWF	ID	3.48	-	-	-	2.44	-	-	-	0.0253386	0.931749	0.499393	0.0218447					7
LGMN	ID	15.87	0.99	12.28	8.43	-	-	1.3	-	0.0176411	0.952075	0.0169181	0.796881
HGFR	ID	-	-	10.95	30.7	-	-	-	6.05	0.17518	0.580385	0.0511639	0.858677
CDH1	ID	18.51	2.72	7.89	-	15.67	3.72	5.8	3.52	0.299826	0.31799	-0.114882	0.560464					8
CD14	ID	2.88	-	7.96	-	6.01	-	1.29	6.05	0.83247	0.00984184	0.832933	0.00128256	0.715258	0.00702331	0.984929	0.00270551	9
ICAM2	-	3.48	-	5.23	-	11.06	-	0.92	-	-0.463958	0.119355	-0.201741	0.0950313
ALCAM	-	-	1.21	-	4.43	-	7.64	-	1.84	0.0147229	0.968815	0.0920788	0.851419
IGF1R	-	-	-	-	-	2.44	-	-	-	-0.678865	0.054158	-0.230644	0.295512	0.0141055	0.961031	-0.363217	0.167244
AXL	-	-	-	5.98	52.98	-	-	-	13.62	-0.0742865	0.796502	0.0180627	0.887179
ADAM17	-	-	4.28	15.93	23.28	3.36	-	6.34	-	0.0566287	0.846491	0.0665804	0.288299
PI3	-	10.91	-	15.93	-	-	-	-	-	-0.0180251	0.949032	0.0306721	0.756897
NRCAM	-	3.48	-	5.98	-	-	12.31	6.34	-	0.859884	0.0406421	0.597714	0.101723
*SET 1: Cases vs. Healthy Controls, Non-Surgical Collections for All Cases and Controls
**SET2: Cases vs. Controls n=39, Surgical Collections for All Cases and Controls
Ratio* indicates cancer only peptide also observed for the protein
