# Supplementary material for: Integrated Proteomic Analysis of Human Cancer Cells and Plasma from Tumor Bearing Mice for Ovarian Cancer Biomarker Discovery
Source: PLoS One. 2009 Nov 19;4(11):e7916. doi: 10.1371/journal.pone.0007916 (PMC2775948; doi:10.1371/journal.pone.0007916)
Supplement: Table S3 — Proteins decreased at least 1.5-fold in plasma taken from K-ras/Pten mice compared to controls. P-value for all mouse plasma ratios <0.05. (0.02 MB XLS) [file pone.0007916.s008.xls]

## Sheet: Sheet3
Table S3. Proteins Down-Regulated >1.5-fold with p-value <0.05.
Gene Name	Cancer/Control Mouse Ratio	Subcellular Location	Liver	Description
1700012G19Rik	0.435472			riken cdna 1700012g19 gene.
3110045G13Rik	0.0912635			platelet endothelial aggregation receptor 1.
4732495G21Rik	0.306452			10 days neonate skin cdna, riken full-length enriched library,clone:4732493g14 product:actin, cytoplasmic type 5 homolog.
5430402E10Rik	0.603544			6 days neonate head cdna, riken full-length enriched library,clone:5430402e10 product:similar to odorant-binding protein 1f.
6430598A04Rik	0.0310049			riken cdna 6430598a04 gene.
A1bg	0.345551	secreted		alpha-1-b glycoprotein.
Acta1	0.385991	cytoplasm		actin, alpha skeletal muscle.
Amy2	0.0718674	secreted	Y	pancreatic alpha-amylase .
Apon	0.607529			apolipoprotein n.
C1qb	0.605837	secreted		complement c1q subcomponent subunit b .
Col1a2	0.433736	secreted		collagen alpha-2(i) chain .
Cpn2	0.615931	secreted		carboxypeptidase n, polypeptide 2 homolog.
Ear6	0.483117			eosinophil-associated ribonuclease 6.
ENSMUSG00000073777	0.49919			envelope polyprotein.
Es1	0.642797	secreted	Y	liver carboxylesterase n .
F13a1	0.482692	secreted		coagulation factor xiii a chain .
Fbn2	0.11759	secreted		fibrillin-2 .
Fgg	0.613881	secreted	Y	adult male liver tumor cdna, riken full-length enriched library,clone:c730002j02 product:fibrinogen, gamma polypeptide, full insert sequence.
Gdf8	0.635792	secreted		growth/differentiation factor 8 .
Gp1ba	0.640141	membrane		platelet glycoprotein ib alpha chain .
Gpx3	0.663828	secreted		glutathione peroxidase 3 .
H2-Q10	0.541934	membrane	Y	h-2 class i histocompatibility antigen, q10 alpha chain .
Hspg2	0.43219	secreted		basement membrane-specific heparan sulfate proteoglycan core protein.
Kif26a	0.639365			similar to cg14535-pa.
Krt5	0.268741			55 kda protein.
Krt6b	0.592497			keratin, type ii cytoskeletal 6b.
Lifr	0.567659	secreted	Y	leukemia inhibitory factor receptor .
Mup2	0.403226	secreted	Y	major urinary protein 2.
Pap	0.091631	secreted		regenerating islet-derived protein 3 beta .
Pms2	0.0226101	nucleus		pms1 protein homolog 2.
Ppm1e	0.602615	cytoplasm		protein phosphatase 1e.
Psma4	0.623839	cytoplasm	Y	proteasome subunit alpha type 4.
Rcsd1	0.58079			rcsd domain containing 1.
Reg3g	0.439598	secreted		regenerating islet-derived protein 3 gamma .
Srebf2	0.587328	nucleus		sterol regulatory element binding factor 2.
Tkt	0.401708	cytosol	Y	transketolase.
