# Supplementary material for: Integrated Proteomic Analysis of Human Cancer Cells and Plasma from Tumor Bearing Mice for Ovarian Cancer Biomarker Discovery
Source: PLoS One. 2009 Nov 19;4(11):e7916. doi: 10.1371/journal.pone.0007916 (PMC2775948; doi:10.1371/journal.pone.0007916)
Supplement: Table S4 — Detailed information about the 58 proteins found up-regulated in the mouse model plasma experiment and enriched in the human cancer cell data. (0.04 MB XLS) [file pone.0007916.s009.xls]

## Sheet: Sheet1
Table S4.
Description	Mouse Gene Name	Human Ortholog	PubMed Plasma Ovarian Biomarker Reference
thrombospondin 1.	Thbs1	THBS1	8194026 (patients with gynecologic malignancies)
clusterin.	Clu	CLU
fibulin-1.	Fbln1	FBLN1
inter-alpha-trypsin inhibitor heavy chain h2.	Itih2	ITIH2
tenascin.	Tnc	TNC
metalloproteinase inhibitor 1.	Timp1	TIMP1	17214341 (levels during chemotherapy), 16112717 (case vs. control)
apolipoprotein.	Apob	APOB	9023386 (disease outcome), 15866092 (benign vs. malignant tumors)
fatty acid synthase.	Fasn	FASN	11165205 (cancer vs. control)
protein nov homolog.	Nov	NOV
vitamin k-dependent protein s.	Pros1	PROS1
cellular nucleic acid-binding protein.	Cnbp	CNBP
alpha-2-hs-glycoprotein.	Ahsg	AHSG
retinoic acid receptor responder protein 2.	Rarres2	RARRES2
dickkopf-related protein 3.	Dkk3	DKK3
insulin-like growth factor binding protein 2.	Igfbp2	IGFBP2	15014034 (prognostic marker)
insulin-like growth factor-binding protein 4.	Igfbp4	IGFBP4
follistatin-like 1.	Fstl1	FSTL1
neutrophil gelatinase-associated lipocalin.	Lcn2	LCN2	18612378 (case vs. control), 17294443 (cancer vs. control)
cathepsin z.	Ctsz	CTSZ
complement factor h-related protein.	Cfh	CFH
granulin.	Grn	GRN
serine protease inhibitor a3n.	Serpina3n	SERPINA3
connective tissue growth factor.	Ctgf	CTGF
wap four-disulfide core domain protein 2.	Wfdc2	WFDC2	18612378 (case vs. control), 12839961 (case vs. control)
fibulin-2.	Fbln2	FBLN2
leucine-rich alpha-2-glycoprotein.	Lrg1	LRG1
72 kda type iv collagenase.	Mmp2	MMP2	16112717 (case vs. control)
plexin domain-containing protein 2.	Plxdc2	PLXDC2
complement component 9.	C9	C9
tyrosine-protein phosphatase non-receptor type substrate 1.	Sirpa	SIRPA
lysozyme.	Lyz	LYZ
cofilin1.	Cfl1	CFL1
cathepsin b.	Ctsb	CTSB	10943039 (case vs. control), 9166974 (case vs. control)
cathepsin d.	Ctsd	CTSD	16202931 (case vs. control)
copper transport protein atox1.	Atox1	ATOX1
inter alpha-trypsin inhibitor, heavy chain 4.	Itih4	ITIH4	15313933 (case vs. control)
di-n-acetylchitobiase.	Ctbs	CTBS
interferon gamma inducible protein 30.	Ifi30	IFI30
proprotein convertase subtilisin/kexin type 9.	Pcsk9	PCSK9
proteoglycan-4.	Prg4	PRG4
probable e3 ubiquitin-protein ligase herc4.	Herc4	HERC4
scotin.	Scotin	SCOTIN
ribonuclease 4.	Rnase4	RNASE4
complement c5.	Hc	C5
kininogen-1.	Kng1	KNG1
endothelial protein c receptor.	Procr	PROCR
elongation factor 1-beta.	Eef1b2	EEF1B2
prostaglandin e synthase 3.	Ptges3	PTGES3
macrophage migration inhibitory factor.	Mif	MIF	18060075 (case vs. control), 17403417 (case vs. control)
notch gene homolog 2.	Notch2	NOTCH2
macrophage receptor marco.	Marco	MARCO
hydroxyacylglutathione hydrolase.	Hagh	HAGH
apolipoprotein f.	Apof	APOF
transforming growth factor beta-1.	Tgfb1	TGFB1
complement component 6.	C6	C6
coagulation factor xi.	F11	F11
properdin.	Cfp	CFP
vascular cell adhesion protein 1.	Vcam1	VCAM1	14720381 (case vs. control)
