# Supplementary material for: Integrated Proteomic Analysis of Human Cancer Cells and Plasma from Tumor Bearing Mice for Ovarian Cancer Biomarker Discovery
Source: PLoS One. 2009 Nov 19;4(11):e7916. doi: 10.1371/journal.pone.0007916 (PMC2775948; doi:10.1371/journal.pone.0007916)
Supplement: Table S5 — Categorization of upregulated IPAS data into cancer related biological processes. Each upregulated protein was assigned to a cancer related process according to its ranked network appearance determined by Ingenuity Pathway Analysis. (0.04 MB XLS) [file pone.0007916.s010.xls]

## Sheet: Sample 4 -DD
Table S5.
	Upregulated in Mouse Plasma + Enriched in Ovarian Cancer Cell Data											Upregulated in Mouse Plasma, Not Enriched in Ovarianc Cancer Cell Data
	Network 1		Network 2		Network 3		Network 4		Other			Network 1		Network 2		Network 3		Other
Cancer Involved process	Protein	#	Protein	#	Protein	#	Protein	#	Protein	#		Protein	#	Protein	#	Protein	#	Protein	#
Cellular Proliferation/ Tumor Growth	C9, Cnbp, Ctgf, Grn, Igfbp2, Igfbp4, Lcn2, Lrg1, Lyz, Mmp2, Nov, Ptges3, Sirpa, Thbs1, Timp1, Tnc, Vcam1	17	Cfl1, Clu, Ctsb, Ctsd, Fasn, Ifi30, Igfbp2, Mif, Tgfb1	9	Cfh, Ctbs	2	Dkk3, Igfbp4, Itih4, Lcn2, Notch2, Wfdc2	6	Prg4	1		Camp, Il18bp, Postn, Ppia, Proc, S100a8, Tnfrsf9, Vasp	8	F9, Fetub, Il18bp, Lyve1, Tff3, Tnfrsf9, Tnfrsf21	7	Hp, Ppbp, Stip1	3		0
Cellular Apoptosis	Apob, C6, C9, Ctgf, Fbln1, Grn, Igfbp4, Lcn2, Mmp2, Pcsk9, Sirpa, Thbs1, Timp1, Tnc	14	Clu, Ctsd, Fasn, Tgfb1	4	Cfh, Kng1	2	Dkk3, Igfbp4, Lcn2, Notch2	4	Scotin	1		Camp, Ppia, Prdx5, Proc, S100a8, Tnfrsf9	6	Tff3, Tnfrsf9, Tnfrsf21	3	Pglyrp1, Stip1	2		0
Cytoskeletal/Tissue Remodeling	C6, C9, Ctgf, Fstl1, Igfbp2, Igfbp4, Mmp2, Nov, Sirpa, Timp1, Tnc, Vcam1	12	Cfl1, Clu, Ctsd, Igfbp2, Marco, Tgfb1	6	Ctbs, Kng1, Rarres2	3	Eef1b2, Igfbp4, Itih2, Procr	4		0		Camp, Itih3, Proc, Vasp	4	Tpm4	1	Hp, Ppbp	2	Kng2	1
Regulation of Tumor Microenvironment/ ECM	Apob, Fstl1, Igfbp2, Lcn2, Mmp2, Pcsk9, Sirpa, Thbs1, Timp1, Tnc, Vcam1	11	Cfl1, Clu, Fasn, Fbln2, Igfbp2, Marco, Pros1	7	Kng1	1	Dkk3, Itih2, Lcn2, Wfdc2	4		0		Camp, Itih3, Postn, Ppia, Vasp	5		0	Apoh, Pglyrp1, Ppbp	3	Adamts2	1
Homeostasis	Grn, Lyz, Mmp2, Sirpa, Thbs1	5	Cfl1, Marco, Tgfb1	3	Atox1, Kng1	2	Eef1b2	1		0		Camp, Ppia, Prdx5, S100a8	4		0	Mb	1	Adamts2, Kng2	2
Cellular Migration/ Invasion/ Metastasis	Apob, Ctgf, Fbln1, Fstl1, Grn, Igfbp2, Igfbp4, Lcn2, Mmp2, Nov, Sirpa, Thbs1, Timp1, Tnc, Vcam1	15	Cfl1, Clu, Ctsd, Fbln2, Igfbp2, Pros1, Tgfb1	7	Cfh, Ctbs, Kng1, Rarres2	4	Dkk3, Igfbp4, Lcn2, Procr	4		0			0		0		0	Ang1	1
Cellular Metabolism	Apob, Cnbp, Igfbp2, Igfbp4, Lyz, Mmp2, Ptges3, Sirpa, Thbs1, Tnc	10	Ctsd, Igfbp2, Tgfb1	3	Atox1, Ctsz, Kng1	3	Eef1b2, Hagh, Igfbp4, Wfdc2	4		0		Ppia, S100a8, Tnfrsf9	3	Pik3ip1, Tnfrsf9	2	Mb, Ppbp, Stip1	3	Clec4f	1
Angiogenesis	C6, Ctgf, Mmp2, Nov, Thbs1, Timp1	6	Mif, Tgfb1	2	Ctbs, Kng1, Plxdc2	3	Rnase4	1		0					0		0	Ang1	1
Tumor progression	C9, Fstl1, Igfbp2, Igfbp4, Lcn2, Lyz, Mmp2, Nov, Pcsk9, Sirpa, Timp1, Tnc	12	Clu, Ctsd, Igfbp2, Tgfb1	4	Cfh, Kng1, Rarres2	3	Dkk3, Igfbp4, Lcn2, Wfdc2	4		0		Il18bp, Postn, S100a8, Tnfrsf9	4	Il18bp, Tnfrsf9	2	Hp, Stip1	2	Kng2	1
Role in cell homing/ trafficking	Mmp2, Nov, Sirpa, Thbs1, Vcam1	5	Tgfb1	1	Rarres2	1				0		Camp, Ccl8, Ppia, S100a8	4	Tff3	1	Ppbp	1		0
Inflammation/Immuno-surveillance	Apob, C6, C9, Grn, Igfbp4, Lcn2, Lyz, Mmp2, Sirpa, Thbs1, Timp1, Tnc, Vcam1	13	Clu, Ctsb, Ctsd, Ifi30, Marco, Mif, Pros1, Tgfb1	8	Apof, Cfh, Cfp, F11, Kng1, Rarres2	6	Igfbp4, Lcn2, Notch2, Procr	4	Serpina3n, Hc	2		Ambp, Camp, Ccl8, Il18bp, Postn, Ppia, Prdx5, Proc, S100a8, Scgb1a1, Tnfrsf9	11	F9, Fetub, Habp2, Il18bp, Tnfrsf9, Tnfrsf21	6	Apoh, Cd5l, , Hp, Mb, Pglyrp1, Ppbp, Stip1	7	Clec4f, Fgl1, Hpxn, Ccl9, Cfhrc, Orm3	6
Previously associated with ovarian disease	Igfbp2, Igfbp4, Lcn2, Tnc	4	Clu, Fasn, Ifi30, Igfbp2	4	Apof, Cfh, Kng1	3	Igfbp4, Lcn2, Wfdc2	3		0		Postn, S100a8, Tnfrsf9	3	Tff3, Tnfrsf9	2		0	Kng2	1
Implicated in response to chemotherapy drugs	Fbln1, Igfbp2, Igfbp4, Ptges3, Thbs1	5	Clu, Igfbp2	2	Atox1	1	Igfbp4	1		0			0		0	Stip1	1		0
Implicated in clinical outcome	Igfbp2, Lcn2, Nov, Tnc	4	Clu, Igfbp2	2		0	Lcn2	1		0		Postn	1		0		0		0
