# Supplementary material for: Integrated Proteomic Analysis of Human Cancer Cells and Plasma from Tumor Bearing Mice for Ovarian Cancer Biomarker Discovery
Source: PLoS One. 2009 Nov 19;4(11):e7916. doi: 10.1371/journal.pone.0007916 (PMC2775948; doi:10.1371/journal.pone.0007916)
Supplement: Table S6 — Detailed GO processes for GeneGo networks shown in Figure S2. (0.03 MB XLS) [file pone.0007916.s011.xls]

## Sheet: Sheet1
Table S6.
	Network 1		Network 2		Network 3		Network 4		Network 5
	%	p-value	%	p-value	%	p-value	%	p-value	%	p-value
response to external stimulus	59.18	1.581e-19	44.9	6.931e-12	45.65	1.404e-11	72.92	5.262e-28
response to wounding	48.98	1.138e-18	34.69	1.155e-10	36.96	3.591e-11	60.42	7.993e-26
response to stress	65.31	1.356e-16			47.83	2.889e-08	72.92	1.774e-20
response to stimulus	81.63	1.53e-16	61.22	9.534e-08	65.22	1.146e-08	83.33	3.714e-17
inflammatory response	34.69	2.06e-13			30.43	2.101e-10
organ development	57.14	1.318e-12
response to chemical stimulus	51.02	3.147e-12
positive regulation of biological process	55.1	6.363e-12			47.83	1.876e-08	62.5	3.784e-15
defense response	38.78	8.667e-12			39.13	2.564e-11
tissue development	32.65	3.454e-11
system development	57.14	4.574e-10
regulation of developmental process	42.86	1.225e-09					52.08	1.292e-13
blood coagulation			20.41	1.225e-11
coagulation			20.41	1.225e-11
hemostasis			20.41	2.104e-11
wound healing			24.49	6.178e-11			33.33	1.573e-16
regulation of body fluid levels			20.41	3.173e-10
negative regulation of biological process			42.86	2.066e-07
Wnt receptor signaling pathway			14.29	2.419e-07
cell surface receptor linked signal transduction			42.86	9.155e-07
embryonic limb morphogenesis			12.24	9.792e-07
regulation of binding					19.57	6.828e-10
regulation of transcription factor activity					17.39	7.758e-10
regulation of DNA binding					17.39	2.713e-09
immune system process					39.13	7.667e-09
positive regulation of NF-kappaB transcription factor activity					13.04	8.13e-09
regulation of programmed cell death							47.92	5.211e-16
regulation of apoptosis							45.83	5.726e-15
organ development							62.5	6.922e-15
positive regulation of cellular process							58.33	2.914e-14	13.95	2.011e-06
regulation of protein metabolic process							35.42	3.331e-13
actin cytoskeleton organization									25.58	1.343e-09
actin filament-based process									25.58	2.59e-09
cellular component organization									55.81	1.231e-08
anatomical structure organization									55.81	1.267e-08
anatomical structure morphogenesis									58.14	5.528e-07
localization of cell									25.58	5.864e-07
cell motion									25.58	5.864e-07
sarcomere organization									9.3	1.589e-06
myofibril assembly									9.3	6.184e-06
striated muscle cell development									9.3	6.184e-06
muscle cell development									9.3	7.983e-06
