# Supplementary material for: Integrated Proteomic Analysis of Human Cancer Cells and Plasma from Tumor Bearing Mice for Ovarian Cancer Biomarker Discovery
Source: PLoS One. 2009 Nov 19;4(11):e7916. doi: 10.1371/journal.pone.0007916 (PMC2775948; doi:10.1371/journal.pone.0007916)
Supplement: Table S7 — Clinical characteristics and protein level measurements for individual human samples. (0.11 MB XLS) [file pone.0007916.s012.xls]

## Sheet: 20080829 2006 ODS with early st
Table S7.
Shading indicates cancer patients with two collections.
Sample Number	Sample Status	Stage	Ovary Histology	ELISA Sample Set	Surgical Collection	TNFRSF21	AXL	THBS1	DKK3	ADAM17	LGMN	HGFR	ICAM2	VWF	ALCAM	CD14	LYVE1	VCAM1	NRCAM	CDH1	PI3	IGF1R	GRN	NOV	NAP2	TIMP1	LCN2	TGFB1	IGFBP2	RARRES2
1	Cancer	IA	other	SET 2	YES	-0.243963	-0.341681	-0.994934	1.27043	-0.262029	-0.300351	-1.93704	-0.82875	3.74786	-2.65409	-0.873081	0.107197	-0.754449	-0.0152402	0.129456	-0.256331	-0.292784	0.582024	-0.425947	-1.17769	1.43092	0.0709687	-1.1217	1.20351	-0.888894
2	Cancer	IA	clear cell	SET 2	YES	-0.185747	0.0464159	-1.41956	0.362764	-0.162021	0.319581	-2.06787	-0.417861	1.76439	-0.703221	0.970034	0.493105	-0.312883	4.31661	0.86401	0.295148	-0.556839	-0.152615	0.0501575	-0.688025	0.709861	2.88543	-0.808477	3.91074	-0.0291531
3	Cancer	IA	clear cell	SET 1	NO	-0.168186	0.386001	-0.956318	0.972387	-0.208887	0.963299	0.848909	-0.25426	0.829574	-0.703221	0.99906	0.509184	0.771664	8.41099	0.866762	0.304189	-0.908913	0.550711	0.846015	-0.509317	1.06567	1.33959	-1.05817	4.11324	1.60335
4	Cancer	IA	clear cell	SET 1	NO	2.11347	0.762056	-0.181599	-0.141835	0.522369	2.13131	-0.356039	0.49956	0.999044	0.869265	0.349482	1.3175	0.272269	0.780499	0.0417208	-0.527034	NA	1.11312	2.94609	-0.28691	0.910242	-0.518352	-0.594701	-1.82017	-0.391391
5	Cancer	IA	mucinous	SET 2	YES	-0.231831	-0.648925	-0.159688	-0.829389	0.733875	-0.138915	0.340975	-0.544973	0.0686749	-3.47073	-0.346995	-0.954051	-1.88548	-0.948758	0.982309	-0.244384	-0.446816	0.254447	-0.354237	-0.870516	-0.452803	0.745308	0.50138	0.619718	-0.190122
6	Cancer	IA	other	SET 2	YES	-0.209055	-0.708217	1.68213	-1.47965	-0.262029	-0.433953	0.117791	-0.754678	0.684994	-3.65221	0.077502	-0.857574	-1.62983	-1.32544	0.459593	-0.204024	-0.864904	-0.863167	-0.463565	1.0523	-0.0111954	-2.93313	-0.0218079	2.90249	-0.7951
7	Cancer	IA	other	SET 2	YES	-0.306754	-0.498139	0.865543	-0.726108	-0.208321	-0.300754	-2.49157	-2.23609	0.207464	-0.490894	-1.27104	-1.12871	-2.43104	2.81394	-0.201651	0.267003	NA	-0.126251	-0.25965	-0.466696	-0.543145	-0.539459	-0.613625	-0.734334	-0.812473
8	Cancer	IA	endometrioid	SET 2	YES	-0.23811	-0.422535	-0.643189	-0.0842936	-0.262029	-0.391443	-1.17513	-0.618488	-0.0348641	-0.914943	-0.931132	-1.01837	-0.58402	-0.580264	-1.24336	-0.167862	-0.710872	-0.704196	-0.355413	0.731213	-1.01564	0.271634	-0.873262	1.22923	-0.310987
9	Cancer	IA	serous	SET 2	YES	-0.330948	-0.862252	-0.553093	-0.582157	-0.237791	-0.353339	0.113078	-0.791463	0.606426	1.11657	0.192645	-1.0075	-1.09334	-1.27729	0.139069	-0.105407	NA	0.444577	-0.247353	-0.913457	-0.958063	-0.457707	-0.710948	-0.219256	0.0108607
10	Cancer	IA	serous	SET 2	YES	-0.284036	-1.6318	-0.333806	-0.243447	-0.253509	-0.342822	0.00105026	-2.52228	0.103675	-1.87578	1.21719	-1.06627	-2.38764	-0.863298	-0.542371	-0.0184564	NA	-1.13934	-0.255197	-0.507125	-0.229026	-0.677736	-0.250196	9.95701	-0.774403
11	Cancer	IA	clear cell	SET 2	YES	0.234056	1.05645	-0.607541	-0.599092	-0.0756142	0.393369	1.94754	-0.570425	1.04156	0.263376	1.05582	2.04476	0.842692	0.597855	0.445022	2.27506	NA	1.46281	-0.177386	0.987012	1.74946	1.05988	-0.01518	8.37002	0.876381
12	Cancer	IA	endometrioid	SET 2	YES	-0.299083	0.555467	-0.606781	-1.11562	-0.2444	-0.290894	-0.220205	-0.463058	1.5794	-1.70267	4.02514	1.72153	0.473777	-0.351894	-1.0013	-0.305557	NA	-0.131393	-0.210885	-1.06478	2.84184	1.2877	-0.536352	12.2261	0.316888
13	Cancer	IA	other	SET 2	YES	-0.305869	-0.350944	0.311163	0.239213	-0.264226	-0.359255	-1.25926	-0.0148526	0.771355	-0.478528	1.04221	0.443331	0.213366	0.281272	0.750975	-0.128375	NA	-0.213675	-0.248413	0.390897	0.317167	-1.01636	-0.0813832	1.36774	0.435109
14	Cancer	IA	serous	SET 1	NO	-0.328292	-1.38131	-0.20532	-0.751511	-0.244757	-0.39212	-1.4021	-2.82792	1.47777	-1.51719	-0.0707656	-0.570417	-1.96137	-0.571067	-0.632766	-0.312119	NA	-0.763933	-0.259014	-0.807329	-1.40814	-0.919464	-0.935174	0.783058	-1.01288
15	Cancer	IA	serous	SET 2	YES	-0.31531	-1.78157	0.148674	-0.167238	-0.239756	-0.407896	-0.573093	0.0242056	0.487115	0.0160746	0.308289	-1.22421	0.0971114	-0.88765	-0.139069	0.0225579	NA	1.57081	-0.228271	-0.356725	0.277316	0.216527	-0.594436	4.47213	0.122668
16	Cancer	IA	other	SET 2	YES	-0.320916	-0.335449	-0.284558	-1.19183	-0.253866	-0.253427	-0.907776	0.494655	0.187894	-0.72583	-1.19621	-0.776105	0.180815	4.59167	-0.326813	-0.325244	NA	0.871413	-0.267495	0.411909	0.0147683	-0.0573633	0.714029	4.08234	-0.648931
17	Cancer	IB	endometrioid	SET 2	YES	-0.233853	-0.427925	-0.481046	-0.504257	-0.262029	-0.138915	1.87247	-0.397029	-0.240694	-0.355391	0.685222	0.428787	0.0667083	0.0830249	0.327538	-0.0416157	0.367355	-0.00327844	-0.0203765	-0.593723	-0.0788929	0.587921	-0.876347	0.570647	0.545759
18	Cancer	IC	serous	SET 2	YES	0.16834	-0.476437	-0.521483	-0.531351	-0.262029	1.16168	-1.11357	-0.484596	-0.723044	-1.20228	-0.68623	-0.889733	-1.50589	-0.645774	0.0166597	0.529882	-0.0947421	-0.472966	1.25159	-0.173974	-0.850329	-0.731519	-0.721271	-0.670814	-1.61745
19	Cancer	IC	mucinous	SET 2	YES	-0.228531	-0.697437	-0.716862	-0.219766	-0.262029	-0.320087	5.02783	-0.483815	0.395131	-1.26277	-0.644506	-0.937971	-0.622754	-0.907814	-0.0741279	-0.111681	-0.22677	-0.0249563	-0.0744525	0.233734	0.452453	0.2881	-0.596383	2.06871	1.45971
20	Cancer	IC	clear cell	SET 2	YES	0.325224	0.116465	0.186334	1.07752	-0.12884	0.786442	0.0416604	-0.245173	-0.241975	0.213916	0.415996	0.520464	1.03025	0.0133939	-0.764882	-0.527034	NA	-0.126251	-0.169754	-0.45491	-0.322793	0.347279	-0.798302	6.22618	-1.24342
21	Cancer	IC	serous	SET 2	YES	-0.317671	-1.05593	0.738078	-0.455141	-0.204927	-0.292209	-0.437259	-1.40606	-0.269104	-0.0581159	1.28257	0.164183	-0.882528	-0.510186	0.285092	-0.162827	NA	0.645139	-0.263678	0.0906501	-0.575963	0.932399	0.144353	-0.316703	0.00506778
22	Cancer	IIA	serous	SET 2	YES	-0.223316	3.39914	0.0087068	-0.856484	-0.0134717	-0.343367	0.233231	0.460926	-0.354922	-0.0226845	1.02809	0.895093	-0.715715	-1.39914	-1.37817	-0.20015	-0.996932	-0.728283	-0.569365	-0.0184535	-0.280411	1.11475	-0.690213	3.78922	-0.694626
23	Cancer	IIA	endometrioid	SET 2	YES	-0.227361	-0.697437	1.86271	-1.47965	0.814636	-0.142458	0.317887	-0.466195	2.18861	-3.28926	-0.376021	-1.83842	-1.07981	-0.0316177	1.44725	-0.148812	0.719429	-0.827037	-0.330726	1.97534	1.13494	1.77999	1.46119	0.0825369	0.185163
24	Cancer	IIA	serous	SET 2	YES	-0.298788	0.694915	0.534843	-3.60514	-0.12366	-0.236337	-0.56049	-0.0906921	1.79818	0.88163	2.1824	2.25412	0.80394	0.0499227	0.00695347	0.19974	NA	1.24168	-0.237176	-0.642557	2.24408	0.427218	-0.000751191	0.908347	2.16914
25	Cancer	IIA	clear cell	SET 2	YES	-0.333308	0.408272	-0.368807	-1.34425	-0.242792	-0.177179	0.591997	-2.22593	1.69385	0.213916	2.00175	0.2707	-0.606617	0.74397	-0.354627	-0.28587	NA	0.819987	-0.285728	2.01277	1.25484	0.953424	0.682786	1.03364	1.16542
26	Cancer	IIA	clear cell	SET 2	YES	-0.328292	0.416019	0.540945	-0.311189	-0.204391	-0.27972	-0.997398	-1.42883	0.619653	-1.34408	0.396344	-0.346364	0.157564	12.1288	1.44632	-0.146421	NA	-0.198247	-0.230391	2.50098	2.76214	0.645929	3.81974	5.40484	0.486265
27	Cancer	IIB	endometrioid	SET 2	YES	-0.21725	-0.212315	-1.12004	0.823368	-0.262029	-0.415734	1.17984	0.0701778	-0.687308	-1.36863	0.0140088	-1.08269	-1.13404	-0.383734	0.619159	-0.182391	1.26954	0.0400773	-0.213169	0.676969	-0.56537	0.718225	-0.899552	0.653526	-0.347369
28	Cancer	IIB	serous	SET 2	YES	-0.329177	-0.986206	-0.498598	0.21381	-0.236005	-0.395407	-0.72433	-0.213997	-0.106873	-0.997862	-0.913528	-0.614493	-1.23129	0.110804	-0.716207	-0.212044	NA	0.156592	-0.274491	-0.967722	-1.36361	-0.527429	-0.786554	7.75749	-0.305495
29	Cancer	IIB	serous	SET 2	YES	-0.325932	-0.301879	-0.336181	-1.25111	-0.242792	-0.373715	-1.3923	-2.12014	0.049823	-0.602179	0.32265	-0.0819079	-1.71956	-0.108369	-0.403301	-0.218606	NA	0.830272	-0.249473	-0.712831	-1.02604	-0.938635	-0.64562	0.685611	0.0578419
30	Cancer	IIC	clear cell	SET 2	YES	-0.227573	-0.697437	11.0349	-0.802295	0.810033	-0.287193	0.0716154	-0.579032	-0.412817	-3.65221	0.208116	-1.42036	-0.82417	-0.481999	0.723702	-0.181746	-0.402807	-0.68011	-0.468267	6.10998	0.0801174	0.550801	1.20384	-0.067669	-0.591654
31	Cancer	IIC	serous	SET 2	YES	-0.199157	-0.735168	-1.31803	0.376311	-0.262029	-0.377779	-0.00534443	-0.402048	0.574979	1.29302	0.723318	-1.37212	1.03505	-0.965136	-0.541822	-0.116847	-0.358798	-0.829446	-0.289581	-0.0921611	1.20421	0.532302	-0.328857	-0.504341	0.519368
32	Cancer	IIC	serous	SET 2	YES	-0.285511	-0.464568	-0.214225	-0.0994959	0.00243802	-0.250141	0.873468	-0.736466	0.0550867	1.71009	0.287503	-0.577763	-1.31655	2.75306	0.771835	0.293252	NA	-0.655938	-0.252653	-0.23231	0.183549	0.356919	-0.151875	3.49766	0.0541335
33	Cancer	IIC	serous	SET 2	YES	-0.24332	-0.454238	-0.269053	0.730342	-0.231719	-0.164033	-0.596899	-2.84018	0.883243	0.275741	2.59282	-0.31698	-0.476412	0.366506	-0.285092	0.703396	NA	0.336583	-0.217246	0.144876	8.87808	-0.383562	-0.381673	27.066	0.75617
34	Cancer	IIC	other	SET 2	YES	-0.328587	-2.08629	-0.654699	0.112197	-0.247793	-0.375687	-0.988996	-2.75436	0.150373	-0.416703	0.663534	1.14487	-1.86372	0.0742753	-1.06388	-0.205482	NA	-0.861642	-0.27852	-0.265125	0.110879	-0.822262	-0.77931	0.421111	-1.35057
35	Cancer	IIIB	serous	SET 2	YES	-0.224913	-0.298559	7.59643	0.0376311	-0.0423446	-0.378285	2.22649	-0.139058	0.160666	-1.2779	1.31471	0.284071	-0.196682	0.738125	0.924536	-0.1811	-1.327	0.00635617	-0.316619	9.96719	2.2732	42.2931	2.20122	5.22491	3.20677
36	Cancer	IIIB	serous	SET 2	YES	-0.191281	-0.298559	-0.383159	-0.721012	-0.262029	-0.420795	-1.10587	0.0545202	-0.0915882	-0.975435	-0.368764	-2.03138	-0.715715	-0.506565	0.140461	-0.124919	-0.754881	-0.725874	0.0184172	-0.291238	1.07039	-0.5202	-0.804549	2.38402	-0.0585202
37	Cancer	IIIC	serous	SET 2	YES	-0.166271	0.224294	2.1005	-0.748106	0.278605	-0.223935	1.52616	-0.238334	1.41421	-1.0813	4.24991	-2.562	1.92593	1.59794	2.82282	1.26928	-1.01894	0.806029	0.365209	0.749412	6.58694	8.18476	0.0934971	10.69	2.65547
38	Cancer	IIIC	serous	SET 2	YES	-0.240771	-1.51675	9.56961	1.08076	-0.262029	-0.39954	0.818125	-1.10106	0.959095	-1.77696	2.073	0.412707	-1.46715	-0.531132	0.104696	-0.209513	-1.01894	-0.506687	-0.146162	3.00703	1.73005	0.00443753	1.2434	3.31231	0.38456
39	Cancer	IIIC	serous	SET 2	YES	-0.243857	-0.875314	5.80732	-1.15452	-0.262029	-0.439519	-2.48345	-0.753384	-0.799976	0.143669	-0.521148	-0.889733	-1.89322	-0.981513	-0.20068	-0.160436	-1.19497	-0.677701	-0.597579	4.06508	0.14624	2.69032	0.518525	1.86177	0.170168
40	Cancer	IIIC	serous	SET 1	NO	-0.200754	-0.190754	-0.170766	-0.368785	-0.262029	-0.00632584	0.487198	-0.171466	-0.509802	-1.35351	-0.312527	0.0911172	0.221644	0.631671	1.29044	0.626746	0.939475	0.478452	-0.0192009	-0.221757	-0.176503	-0.612842	-0.731699	1.68293	0.546151
41	Cancer	IIIC	serous	SET 2	YES	-0.220762	-0.487217	0.171166	-0.531351	-0.262029	-0.13183	-0.251616	0.048855	-0.324337	-1.58036	-0.254477	-0.198314	-1.13404	0.148535	0.225746	0.328405	0.697424	-0.222466	0.0501575	0.248424	-0.277262	0.701524	-0.685923	1.21666	-0.675335
42	Cancer	IIIC	serous	SET 1	NO	-0.173934	0.429123	3.69091	0.173103	2.19216	0.0635114	-0.83651	-0.682947	1.14846	-1.51986	2.74059	1.4418	-0.870651	-0.4083	0.599901	0.845013	-1.45903	2.30662	0.11834	1.03551	4.3734	0.777982	0.633008	3.4558	1.06445
43	Cancer	IIIC	serous	SET 2	YES	-0.220975	-0.163803	8.01766	-1.19516	-0.262029	-0.207741	0.248623	-0.713103	3.05562	-1.30814	1.28024	0.509184	-0.266403	-0.0316177	0.709947	-0.184006	-0.820895	0.292986	-0.382451	3.97585	1.8922	7.13512	-0.120329	5.22429	1.26455
44	Cancer	IIIC	serous	SET 1	NO	-0.225977	0.245855	4.94525	0.579519	-0.262029	-0.32616	-0.00534443	-0.0864203	-0.450347	0.793959	2.2018	0.959411	1.46887	-0.14626	-0.841696	-0.0658317	-0.0507329	0.697639	-0.373046	2.93796	2.25588	-0.147148	4.09345	4.20856	2.7163
45	Cancer	IIIC	serous	SET 2	YES	-0.151158	-0.584242	31.4201	-1.92671	-0.262029	-0.148531	2.64207	-0.620406	-0.188105	17.1419	2.15464	0.830775	-0.715715	4.52133	-0.294219	-0.048719	-1.63507	0.743404	-0.186131	15.4687	6.0863	-0.309128	5.99112	7.4925	2.80394
46	Cancer	IIIC	serous	SET 2	YES	0.00763328	-0.54112	1.87339	-0.951314	0.817147	0.724941	0.0716154	-0.88605	3.10494	-2.95655	2.15645	-0.278712	-1.10305	-0.744039	0.778725	1.62541	-0.490825	1.37929	0.608551	3.43554	3.15956	14.0329	-0.192987	5.7897	4.08194
47	Cancer	IIIC	serous	SET 2	YES	-0.238748	-0.282388	0.4035	-0.815842	-0.262029	-0.277072	0.664206	-0.464589	1.79607	0.189038	-0.176471	-0.568143	-0.405845	0.386009	1.21065	-0.106192	1.77565	-0.17911	-0.0744525	-0.366096	-0.250498	-0.387754	0.0078197	0.251796	-0.855049
48	Cancer	IIIC	serous	SET 1	NO	-0.169038	-0.142242	-0.594364	-1.27645	-0.262029	-0.233044	1.049	-0.267419	-0.627307	-0.0831766	-0.0948366	-0.230473	0.407566	-0.613019	0.875015	-0.167862	-0.182761	-0.0803553	-0.476496	-0.896507	0.173792	-0.927048	-1.11143	0.270503	-0.179376
49	Cancer	IIIC	serous	SET 2	YES	-0.209694	-0.568071	-0.276409	-0.693917	0.302456	-0.198631	-1.10587	-0.646569	1.03244	-3.65221	-0.706185	-0.905812	-1.12629	0.582539	0.775974	-0.13622	1.75365	-0.990826	0.0689665	-0.788606	-0.358342	-1.12839	-0.996758	2.6651	-1.63581
50	Cancer	IIIC	serous	SET 2	YES	-0.207565	-0.5519	-0.228771	-1.61513	0.0308837	-0.264926	0.310191	-0.624666	-0.655474	-1.44425	0.335103	-1.14701	-1.30447	-0.760417	0.426579	-0.144292	-0.776886	-0.217648	-0.476496	-0.570868	0.780707	-1.47333	-0.561084	1.43646	0.436261
51	Cancer	IIIC	clear cell	SET 2	YES	-0.219272	-0.276998	2.07494	-0.328143	0.436359	-0.225959	2.70364	-0.706188	3.3419	-0.476375	4.81591	2.24577	-0.0185062	-1.02246	-1.03152	-0.215648	-0.952923	0.343567	-0.15204	0.416088	2.66915	0.734199	0.0862971	3.94755	1.16323
52	Cancer	IIIC	serous	SET 2	YES	-0.229702	-0.735168	1.80716	0.0105367	-0.262029	-0.364621	0.271711	-0.648353	1.36233	-1.65597	0.436692	-0.696779	-0.498806	0.222234	-1.02877	-0.17884	-0.0947421	1.58884	-0.328375	-0.308995	1.26561	-0.220995	0.237011	7.99472	1.92659
53	Cancer	IIIC	clear cell	SET 2	YES	-0.236301	-0.444096	2.66116	-1.20871	-0.262029	-0.107539	1.03361	-0.408471	0.256325	-1.45937	1.32378	-0.0857574	-0.483312	-0.53932	-0.772917	-0.200473	-0.380802	0.223135	-0.428298	1.54013	0.0722456	0.48443	0.98585	3.9664	0.217649
54	Cancer	IIIC	serous	SET 2	YES	-0.235556	-0.0613888	12.0221	0.132461	-0.262029	-0.299339	1.13366	-0.761971	0.727361	-1.30814	-0.279874	-0.166155	-0.165695	1.50787	1.58206	-0.107806	-1.327	-0.366985	-0.440053	3.98483	1.43879	1.49528	1.61061	2.06521	-0.100384
55	Cancer	IIIC	serous	SET 1	NO	-0.209055	0.197343	27.6625	0.728538	-0.262029	-0.293772	0.779646	-0.631291	-0.248496	-0.158792	-0.61548	0.734298	0.0667083	1.39323	1.63158	-0.00513021	-1.45903	0.902375	0.120691	7.55341	2.82108	0.000274716	2.85479	3.41549	1.02859
56	Cancer	IIIC	serous	SET 1	NO	-0.226935	-0.54112	6.10035	-0.124935	-0.262029	-0.283145	0.748862	-0.183466	-0.510816	-1.77696	1.73558	-0.616381	-1.3432	-0.0807502	0.544878	-0.201118	-0.710872	0.492904	-0.260192	3.69922	0.546128	2.85358	3.41064	4.06923	1.9637
57	Cancer	IIIC	serous	SET 2	YES	-0.244602	-0.449486	10.0981	-0.599087	-0.262029	-0.373224	2.15723	-0.246074	-0.659063	-1.05105	-0.203682	-2.33689	-1.04883	-0.4083	-1.37817	-0.191755	-1.41502	-0.359759	-0.298985	2.92235	1.094	0.393907	0.972178	6.76047	0.463676
58	Cancer	IIIC	serous	SET 2	YES	-0.199902	-0.066779	0.638287	-0.653276	-0.262029	-0.324642	1.35684	-0.516914	-0.629024	2.9868	0.182719	-1.62939	-0.53754	-0.301847	-0.291468	-0.129116	1.66563	0.774716	-0.246085	0.345521	1.3396	0.690194	-0.0351396	1.9219	1.1936
59	Cancer	IIIC	serous	SET 1	NO	-0.246092	0.0679769	1.54278	-1.22226	-0.262029	-0.3545	-0.0669123	-0.124003	-0.0912761	2.5936	0.115598	-1.62939	-0.498806	0.173101	-1.37817	-0.169153	1.00549	1.00354	-0.164971	0.586358	1.5427	1.7522	-0.156856	1.62951	2.2675
60	Cancer	IVA	serous	SET 1	NO	-0.224487	-0.557291	0.153757	-0.436521	-0.262029	-0.301869	2.94222	-0.309574	-0.494587	-0.536867	0.984547	1.47396	-0.723462	0.426952	0.178977	-0.097151	-1.34901	0.150875	0.201805	-0.0331296	0.760241	0.0523961	0.556465	-0.0969138	2.39735
61	Cancer	IVA	serous	SET 1	NO	-0.189259	0.450684	4.187	-1.12743	0.571518	-0.304905	-1.25979	-0.572987	-0.385898	4.99816	2.52108	1.40964	0.639969	0.435141	0.630164	-0.241156	-1.70108	1.11434	0.00078371	3.05012	3.84913	1.72334	0.629748	5.07948	2.04524
62	Cancer	IVA	serous	SET 2	YES	-0.244176	-0.659705	18.3734	-0.0571993	0.503729	-0.331221	1.04131	-0.794312	-0.520803	2.44237	0.893843	-1.21132	-1.67631	0.00932608	-0.954492	-0.14752	-0.930918	0.0954763	-0.242558	1.83488	3.00055	11.1827	1.67327	9.19366	2.92116
63	Cancer	IVA	serous	SET 2	YES	-0.210439	-0.260828	10.3024	-1.08679	-0.262029	-0.25025	0.240927	-0.69517	-0.0695852	1.94331	1.22038	0.171515	-0.181188	-0.555698	0.426579	-0.164633	-0.446816	0.989086	-0.163795	3.12659	3.86094	0.149914	2.07593	2.07049	-0.151483
64	Cancer	IVA	serous	SET 2	YES	-0.203095	-0.54651	5.14941	-1.37128	-0.262029	-0.239117	-0.844206	-0.133594	-0.287119	-1.47449	-0.865825	-2.35297	-1.2425	-1.12891	-1.37817	-0.151395	-1.23898	-0.147798	-0.16262	2.80158	1.99769	0.562883	1.68005	3.68545	1.03223
65	Cancer	IVA	serous	SET 2	YES	-0.225126	-0.573461	1.68878	-0.477162	-0.262029	-0.329197	-2.98369	-0.824579	1.24412	-3.65221	0.313334	-1.74195	-0.56078	-0.875059	-0.401513	0.0801102	-1.19497	0.473635	-0.45416	-0.118698	0.535894	0.869466	-0.322024	1.62165	-1.32252
66	Cancer	IVA	serous	SET 1	NO	-0.219485	-0.692046	-0.948088	-1.5203	-0.262029	-0.43294	-0.651807	-0.419266	-0.806921	-1.414	0.267981	-2.0153	0.0279744	0.746314	0.0909404	-0.22372	-1.59106	-0.227283	-0.515289	-0.75534	0.533533	-0.315902	-0.969071	1.65295	-0.703668
67	Cancer	IVA	serous	SET 2	YES	-0.21725	-0.77829	-1.01709	-3.07822	-0.262029	-0.466341	-2.3834	-0.636733	-0.619583	-2.29114	-1.18329	-2.562	-1.27348	0.173101	-0.627107	-0.275704	-2.31721	-1.42679	-0.673991	-1.22562	-0.530734	0.893285	-1.15344	1.1005	-1.45553
68	Cancer	NA	other	SET 2	YES	-0.230979	-0.492608	0.064812	-1.04614	-0.262029	-0.380815	-0.87499	-0.553672	1.85779	-1.414	-0.528404	0.895093	-0.491059	-0.170826	0.946545	-0.195307	-0.402807	-0.569312	-0.264894	-0.365621	-0.349683	0.522031	-0.776477	3.81871	-0.596199
69	Benign Disease		other	SET 2	YES	-0.248008	-0.411754	4.16856	-1.01905	0.0237701	-0.26695	-0.267008	-1.079	-0.596409	-1.12667	-0.81503	-1.72587	-0.816423	0.336876	0.575141	-0.283453	-0.0287283	0.182188	-0.267245	1.64683	-0.554349	-0.241144	0.383204	1.5985	-1.10495
70	Benign Disease		serous	SET 2	YES	-0.220656	-0.379413	-1.16016	-0.693917	-0.262029	-0.358549	0.895085	-0.60263	-0.520569	-1.20228	-0.0966507	0.267992	-0.204429	-1.01427	-0.197929	-0.0509792	-0.820895	-0.347716	-0.281352	-0.356733	1.05622	1.51113	-0.752992	0.988851	0.729081
71	Benign Disease		other	SET 2	YES	-0.236407	-0.519559	-0.405474	0.362764	-0.262029	-0.38284	-0.451711	-0.527576	-0.559816	-0.854451	-0.985555	-0.777176	-0.754449	-0.219959	0.0414199	-0.143323	0.191318	-0.552451	-0.391855	-0.990999	-0.873944	-0.948207	-1.21579	1.4986	-2.00192
72	Benign Disease		serous	SET 2	YES	-0.22023	0.14344	8.16271	-0.0842936	-0.262029	0.0296049	-0.35936	-0.341782	3.15932	2.82044	-0.488494	1.00765	1.92593	3.93174	0.9603	-0.218554	0.653415	-0.441653	0.0419285	3.37471	0.0391841	1.14729	1.23848	-0.0402642	-0.750728
73	Benign Disease		mucinous	SET 2	YES	-0.238536	-0.400974	7.74623	-0.544898	1.3105	-0.344379	0.140879	-0.315463	-0.412505	-1.44425	-1.1071	-2.14393	-1.52138	1.34409	-1.25162	-0.193046	-2.03115	-0.978782	-0.402435	3.21195	-0.0552775	0.167034	0.97694	1.32574	-0.477966
74	Benign Disease		serous	SET 2	YES	-0.0279138	-0.260828	-1.11324	-0.34169	-0.0971612	0.427374	0.210143	-0.493138	-0.0173085	0.536867	-0.232707	-1.24348	-1.14953	0.590728	1.28218	-0.283776	0.807448	-0.511504	0.339347	-0.832866	-2.12556	-0.607004	-1.0248	0.918181	-0.93939
75	Benign Disease		serous	SET 2	YES	-0.241622	-0.31473	-0.748594	-1.08679	-0.262029	-0.363103	-1.6292	-0.422233	-0.200901	-1.414	-1.1851	-1.21132	-0.58402	-0.555698	-0.0631234	-0.108129	-0.424812	-0.00327844	0.158309	-0.793739	-0.332365	1.32521	-1.00144	-0.28302	-0.633633
76	Benign Disease		mucinous	SET 2	YES	-0.230766	-0.54112	0.672789	-0.802295	-0.262029	-0.352476	1.03361	-0.43198	1.33127	2.66921	0.436692	0.203674	-0.165695	-0.547509	-0.142906	-0.213711	-0.292784	-0.598215	-0.349535	-0.518165	-1.2943	-0.594047	-0.839815	2.13623	-1.41009
77	Benign Disease		serous	SET 2	YES	-0.0968794	-0.476437	-0.317241	-0.721012	-0.262029	0.205716	0.448718	-0.0902343	-0.549673	-0.703221	-0.963786	-1.01837	-0.669235	-0.719473	-1.37817	-0.283776	-0.974927	-0.66084	0.43927	-0.611281	-0.404785	-0.114535	-1.00749	1.8148	-0.643671
78	Benign Disease		serous	SET 2	YES	-0.251413	0.0410257	-1.21049	-2.25184	-0.262029	-0.485065	-2.16791	-0.891893	-0.680832	-2.9868	-2.13932	-2.562	-2.3038	-1.39095	-1.37817	-0.214034	-1.37101	-2.0964	-0.476496	-1.26032	-0.798375	-0.660455	-1.25641	-2.01184	-2.24665
79	Benign Disease		serous	SET 2	YES	-0.103372	-0.363242	0.489992	-1.91316	-0.262029	0.333751	-0.674895	-0.595648	0.959407	-0.869574	0.0702456	-1.99922	-0.576274	0.18129	2.36338	1.35323	2.65584	-0.270639	0.837786	-0.282955	-0.0190672	1.00004	-0.543363	0.526956	-0.879785
80	Benign Disease		non-neo.	SET 2	YES	-0.201818	-0.487217	10.3529	-0.544898	-0.16746	-0.0589568	-1.45988	-0.337878	0.709806	-0.793959	-1.15064	-1.16308	-0.0185062	0.394197	-1.37817	0.746535	-0.600849	-1.39307	-0.100315	3.08498	1.73477	0.301919	1.60142	1.52139	-0.255287
81	Benign Disease		non-neo.	SET 2	YES	-0.228212	0.569269	0.675321	-0.734559	-0.262029	-0.356524	2.54202	-0.824914	-1.01259	-1.2174	0.955522	-1.13093	0.802651	-0.449244	0.313783	-0.143646	-1.61306	0.786759	-0.510587	0.453661	-0.398488	-0.195402	0.43904	2.00815	-0.4166
82	Benign Disease		other	SET 2	YES	-0.2396	-0.336291	0.555514	-0.0978408	0.191568	-0.380309	0.602638	-0.153065	-0.0201174	-0.0226845	1.50156	-0.117916	0.663209	-0.572075	1.95071	0.0248976	-0.424812	1.94773	0.201805	-0.216776	-0.866073	4.40781	-0.80022	2.72173	3.51408
83	Benign Disease		other	SET 2	YES	1.98763	-0.158413	0.250932	0.538877	-0.262029	1.23556	-0.636415	-0.0534546	-0.489047	-0.945189	-0.976484	-0.825415	-0.785436	0.492463	0.806237	-0.283776	0.147309	-0.258596	0.362858	-0.42382	0.982225	-0.237745	-0.819979	-1.42637	-0.705812
84	Benign Disease		serous	SET 2	YES	-0.228957	-0.53573	2.12606	-2.04864	-0.262029	-0.392961	-0.428623	-0.627633	0.407771	-0.355391	0.0357779	0.0107197	-0.53754	-0.940569	-0.896718	-0.172059	0.34535	0.206274	-0.370695	-0.261513	-1.4171	-0.193604	-0.924035	1.15029	-0.305811
85	Benign Disease		other	SET 2	YES	-0.240132	-0.616583	0.0155914	-2.26539	-0.262029	-0.251262	-0.451711	-0.135044	0.782213	-1.06617	-0.140189	-1.17916	-0.917131	0.304121	0.434833	-0.195952	0.719429	-0.256187	-0.413015	-0.361345	-0.839308	0.817566	-0.558749	0.278259	-1.00084
86	Benign Disease		non-neo.	SET 2	YES	-0.238748	-0.600412	19.7011	-1.60158	-0.168297	-0.199643	-1.58302	-0.445006	0.0737465	-0.688098	0.262539	-0.214393	0.0357212	-0.269092	-0.118146	-0.0887562	-1.61306	0.32189	-0.343657	8.6102	-1.14473	2.02264	4.36229	-0.857678	-0.79687
87	Benign Disease		other	SET 2	YES	-0.220656	-0.595022	0.551162	-1.11388	-0.262029	-0.22191	-1.96782	-0.714552	-0.367796	-1.85257	-1.20869	-1.3078	-1.17277	0.0175148	-0.329984	-0.0923078	-1.52504	-0.757186	-0.328375	-0.0526067	-0.752719	-0.0436935	-0.890604	-0.985642	-0.535025
88	Benign Disease		serous	SET 2	YES	-0.245028	-0.659705	-0.897759	-0.707465	-0.262029	-0.412698	-0.0900002	-0.788669	-0.375677	-1.79208	-1.5842	-1.25956	-1.76928	-0.506565	0.200986	-0.204347	-0.182761	-1.02936	-0.650479	-0.406637	-0.0332365	-0.953552	-1.04715	0.772151	-1.602
89	Benign Disease		mucinous	SET 2	YES	-0.191388	-0.665095	-0.285588	0.471141	-0.262029	-0.127276	0.156271	-0.598436	-0.514249	-0.24953	0.723318	1.85986	-0.126961	-0.891437	0.0414199	0.145009	-0.446816	-0.0394082	-0.342481	-0.872034	2.78172	-0.83384	-0.751962	-0.494428	-1.15322
90	Benign Disease		serous	SET 2	YES	-0.222997	-0.621973	4.32801	-0.368785	-0.262029	-0.421807	-1.15205	-0.544193	-0.363895	-0.597359	-0.457655	-2.562	-0.529793	0.942844	1.63158	-0.15979	0.125304	-0.316403	-0.404786	3.60728	-1.1715	0.396801	-0.366803	-0.164692	0.25737
91	Benign Disease		serous	SET 2	YES	-0.223529	-0.190754	22.7941	-0.517804	0.455608	-0.259865	0.0716154	-0.384896	0.395287	2.36675	1.17684	1.42572	1.25971	-0.187204	-0.962746	-0.185297	0.565397	-0.656023	-0.368344	4.3232	-0.494524	1.82529	1.86191	0.669003	-0.0679074
92	Benign Disease		non-neo.	SET 2	YES	-0.229808	-0.735168	0.035612	-1.77769	-0.262029	-0.460268	-1.00582	-0.645699	-0.495133	-0.189038	-0.114792	-0.166155	-0.630501	-1.04702	0.715449	-0.245676	-0.974927	-0.937835	-0.654006	0.476329	-0.510267	-0.294226	-0.570404	-1.79506	-0.360545
93	Benign Disease		other	SET 2	YES	-0.207778	-0.384803	-0.762047	0.18665	-0.262029	-0.419277	-0.444015	-0.512788	-0.439345	-0.415883	0.80858	-1.03445	-0.607261	-0.940569	-1.00126	-0.151072	-0.842899	0.121971	-0.136757	0.119044	1.01371	1.14862	2.24556	1.29793	-0.718357
94	Benign Disease		other	SET 2	YES	-0.249711	-0.341681	-0.043046	0.227292	-0.262029	-0.319581	1.20292	-0.462091	1.04508	-1.42913	-1.41912	-2.35297	-1.01009	-0.768605	-0.423523	-0.198535	-0.358798	-0.839081	-0.220223	0.113332	0.393415	0.29879	0.746533	-0.76737	-0.512328
95	Benign Disease		serous	SET 2	YES	-0.241728	-0.497998	-0.42866	-0.870031	-0.262029	-0.34033	0.310191	-0.673713	-0.269797	-2.69946	-0.75698	-1.19524	-1.00235	-1.21899	0.905278	-0.166247	-0.270779	-0.306769	-0.608159	-0.725055	2.78329	-0.813593	-1.06991	1.1434	-1.73987
96	Benign Disease		serous	SET 2	YES	-0.228106	-0.0290474	-1.5639	-1.38482	-0.262029	-0.363609	-0.590239	-0.0781677	-0.553808	-0.809082	-0.613666	-0.407348	0.740677	-0.73585	-1.29288	-0.137188	0.543392	-0.91134	-0.519992	-1.01611	0.549276	0.819389	-1.07562	-0.018255	-0.619806
97	Healthy Control			SET 1	NO	-0.142121	-0.0849599	3.22919	-0.489012	-0.230826	0.53009	0.384746	1.25235	1.80655	-0.639274	2.75873	0.244989	-0.268703	2.41212	1.68969	-0.103766	NA	-0.0182562	-0.198164	1.74264	1.32516	-0.222351	3.42716	-0.94315	-0.129646
98	Healthy Control			SET 1	NO	-0.214163	-0.390193	-1.09377	-0.368785	-0.262029	-0.41118	0.0639194	-0.569129	-1.01259	0.370514	1.60859	1.84378	0.128682	-0.825927	0.503611	-0.22598	0.0812949	-0.191153	-0.259016	-0.408414	0.242276	-0.819714	-0.0532877	-1.14472	0.85209
99	Healthy Control			SET 1	NO	-0.312065	1.77176	-0.65223	3.0505	-0.23279	-0.351367	0.313328	0.0338388	0.865832	2.62511	-0.0257931	1.40933	2.31835	1.20667	-0.194697	-0.272745	NA	-0.22396	-0.2376	0.652496	2.83715	-0.226306	0.471656	-0.233177	0.844393
100	Healthy Control			SET 1	NO	-0.224381	-0.239267	-0.46427	0.200197	0.416274	-0.416746	-0.120784	-0.261419	1.29647	0.975435	-0.441328	-0.761097	-0.312883	-0.850493	0.974056	-0.226626	0.829452	-0.485009	-0.321321	0.422305	1.07196	0.483038	0.0362364	-0.605203	1.38859
101	Healthy Control			SET 1	NO	-0.158182	0.0787573	-0.296983	0.240839	-0.262029	-0.390431	-0.220832	-0.515353	1.49271	-1.24765	-1.3266	-0.32695	-0.53754	-1.02246	-1.37817	-0.254071	-0.974927	-0.220057	-0.416542	-0.921219	-1.62334	-0.11807	1.30607	0.116384	1.08676
102	Healthy Control			SET 1	NO	-0.214802	-0.368632	-0.937405	0.281481	0.17483	-0.363609	0.610334	-0.701527	-0.441296	0.158792	-0.909363	1.00765	-1.05657	-1.1371	0.25876	-0.182714	0.235327	0.165327	-0.376573	-0.833355	-0.0411083	-1.10845	-0.809223	1.15195	0.0673497
103	Healthy Control			SET 1	NO	-0.191707	-0.643534	-0.369231	0.76918	-0.262029	-0.287699	0.148575	0.00669995	-0.658517	-1.09642	-0.419559	-0.439507	-0.506553	-0.899626	-0.283214	-0.242447	-0.292784	0.179779	-0.301337	-0.551023	0.0596507	-0.812065	-0.684608	0.775622	-0.657565
104	Healthy Control			SET 1	NO	-0.19639	-0.347071	0.336791	0.0918199	-0.262029	-0.0397263	-0.621023	-0.215807	0.126413	0.40076	-0.55743	-2.562	1.86396	-0.219959	0.123954	-0.0561453	-1.08495	2.71127	-0.0956126	0.94383	0.675225	0.603193	0.50944	0.124443	-0.571655
105	Healthy Control			SET 1	NO	-0.318851	-0.263143	-0.435602	0.408568	-0.231719	-0.327046	-0.80135	0.228254	0.353633	-0.861846	-0.869312	-0.0157939	1.1031	1.68154	-0.820509	-0.0988445	NA	-0.722792	-0.265374	-0.549086	0.146042	-0.241742	-0.47752	-0.121809	0.175023
106	Healthy Control			SET 1	NO	-0.232682	3.77107	1.1627	0.159556	-0.0415077	-0.413204	0.73347	-0.353201	-0.669909	-0.763713	-0.515706	-0.423427	-0.886144	0.77088	0.577892	-0.186589	-1.17297	-0.152615	-0.460038	0.899963	0.0706712	-0.555634	-0.596558	1.37549	-0.749638
107	Healthy Control			SET 1	NO	0.386093	-0.201535	-0.737595	0.687896	-0.262029	4.4749	-0.259312	4.25849	-0.487643	0.521744	-0.992811	0.6539	-0.568527	0.230422	-1.37817	-0.283776	0.455374	-0.952287	0.273515	-1.05506	-0.984149	-0.771275	-1.02282	0.532237	-1.01557
108	Healthy Control			SET 1	NO	-0.231937	-0.196145	-1.57229	2.42194	-0.262029	-0.43294	0.802733	-0.160247	-0.368265	-0.234407	-0.943831	0.686059	-1.08756	-0.563887	-1.37817	-0.236312	-2.09716	0.292986	-0.311917	-0.897624	0.159623	-0.190956	-0.779891	-0.48379	-0.387807
109	Healthy Control			SET 1	NO	-0.205224	-0.471047	1.0664	1.83941	-0.262029	-0.424337	1.6416	-0.650561	-0.4285	-0.914943	-0.829543	0.107197	-0.669235	-0.645774	0.123954	-0.270861	0.543392	0.680779	-0.474145	0.78779	-0.357554	-0.95955	0.0863245	-1.56361	-0.682349
110	Healthy Control			SET 1	NO	0.822343	-0.465657	-0.0811089	-0.287502	-0.223532	1.41016	-0.674895	0.277362	-0.680364	-1.2174	0.104713	-0.600302	-0.80093	0.287744	-1.18009	-0.283776	-0.996932	-0.925792	-0.103842	-1.06925	-1.72725	0.00164179	-0.946347	-0.333827	-0.101179
111	Healthy Control			SET 1	NO	-0.214908	-0.131462	-0.650865	-0.978408	-0.0921398	-0.378285	-0.628719	-0.410545	2.73159	0.718344	-0.751537	0.139356	1.01956	0.189479	0.635666	-0.189172	0.1033	-0.91134	-0.59993	-0.781919	-0.44257	0.00911762	-1.00275	-0.619341	-0.546317
112	Healthy Control			SET 1	NO	-0.200966	-0.239267	0.403817	-0.0842936	-0.246965	-0.382334	-0.413231	-0.489815	0.400203	-0.0529306	-0.88578	-1.11485	0.0512147	-0.449244	0.522869	-0.201764	0.521387	-0.191153	-0.261367	-0.596085	-1.06759	-0.66734	1.49893	0.519859	-0.605567
113	Healthy Control			SET 1	NO	-0.315606	-0.28122	0.508201	0.179939	-0.231004	-0.300754	-0.512878	0.754576	-0.175841	1.16603	-0.96228	1.80969	0.80239	-0.388423	0.611905	-0.262902	NA	-0.0645396	-0.240144	0.649326	0.624253	1.07499	0.792605	-0.984913	0.349827
114	Healthy Control			SET 1	NO	-0.211716	-0.374023	-0.480413	-0.571993	-0.0800048	-0.376767	-0.482495	-0.530921	0.0614966	-0.279776	0.184533	-0.680699	-0.196682	-0.60483	0.11295	-0.167862	0.147309	-0.468148	0.0301728	0.214888	-0.108806	0.250783	0.148703	-0.921355	0.359576
115	Healthy Control			SET 1	NO	-0.20086	0.520757	1.52766	0.0918199	-0.262029	-0.123227	0.641118	1.3452	-0.498566	1.414	-0.19824	0.348389	1.39915	0.959221	1.50227	0.559587	0.477378	0.772307	0.319362	-0.1498	4.41826	3.13914	-0.508623	1.29673	0.396627
116	Healthy Control			SET 1	NO	-0.231511	-0.104511	1.07684	-0.111388	-0.200099	-0.3879	-0.674895	0.0719622	-0.364753	-0.264653	-0.250848	0.573503	-0.142454	4.38212	-0.451034	-0.229855	-0.0287283	-0.66084	-0.229627	-0.337636	-0.083616	0.270784	0.037661	-0.76248	-0.165492
117	Healthy Control			SET 1	NO	-0.309115	-1.18505	-0.540817	-0.209576	-0.233505	-0.406581	-1.38249	-1.16085	0.104215	-1.35645	0.819993	-0.50063	-0.837577	-1.05812	-0.597998	-0.382664	NA	-0.0388266	-0.261982	-0.710495	-0.165733	-0.591576	-0.678461	-0.497677	-0.942534
118	Healthy Control			SET 1	NO	4.02917	1.74594	-0.442631	0.442439	4.24798	3.92906	1.43501	0.17641	-2.13758	2.09341	0.040343	-0.342691	-1.14294	1.30408	-0.368534	-0.527034	NA	-0.666223	4.23474	-0.500889	-1.14091	-0.0635294	-0.864481	1.04756	-0.189459
119	Healthy Control			SET 1	NO	-0.331243	-1.48202	-0.537208	-0.878527	-0.214394	-0.417098	-0.578694	1.58215	-0.396782	-0.157036	-1.60437	-0.350037	-1.22819	-0.534538	-0.451975	-0.412194	NA	-1.25248	-0.300358	0.124591	-1.2464	-0.412498	-0.379873	-0.636887	-0.16934
120	Healthy Control			SET 1	NO	-0.229063	-0.250047	-0.820684	1.8936	-0.262029	-0.426868	0.787342	2.7594	-0.426315	0.279776	0.297007	-0.150075	-0.82417	-0.14626	-1.37817	-0.160758	-0.0727375	0.109928	-0.534099	-0.999455	0.394989	0.160814	0.632411	0.75223	-0.945256
121	Healthy Control			SET 1	NO	-0.234917	-0.260828	-1.66163	-0.748106	-0.101764	-0.325148	-0.32088	-0.577203	-0.698466	-0.219284	-0.423187	-0.34303	-0.948118	-0.613019	1.95896	0.0420103	1.02749	-0.104442	-0.477671	-0.392813	-0.543329	-1.44194	-0.810521	1.16583	-1.27737
122	Healthy Control			SET 1	NO	-0.238216	-0.163803	1.33141	-1.56094	-0.262029	-0.409661	-0.582543	-1.1119	-0.452922	-0.854451	-0.718884	-0.101837	-0.0339997	1.86817	0.712698	-0.283776	2.03971	0.630197	-0.570541	0.712934	-0.198544	-0.594565	-0.08634	0.486062	-0.660369
123	Healthy Control			SET 1	NO	-0.175424	-0.465657	1.03427	-0.870031	-0.141935	0.835264	2.43428	-0.397475	-0.57862	-1.09642	-0.668089	-1.54899	-0.227669	0.2468	-0.550075	0.110784	-0.402807	-0.34049	0.328766	0.685959	0.113179	-1.22979	-0.0756878	0.523033	0.35105
124	Healthy Control			SET 1	NO	-0.0914516	0.0410257	-0.468147	1.08076	-0.0917214	0.91421	-1.32905	0.485728	-0.500361	0.294899	0.173649	-0.150075	0.0822018	0.910089	0.654924	5.76571	0.851457	-0.752369	0.823679	-0.625006	0.0769687	1.37354	-0.851322	-0.238391	0.0775311
125	Healthy Control			SET 1	NO	-0.251413	-0.255437	-1.09907	-1.0055	-0.262029	-0.316545	-0.397839	0.07078	-0.746763	-1.2779	-0.865825	-0.34303	-0.769943	-0.228148	-1.16633	-0.239218	-0.534835	-0.810177	-0.334252	-1.12569	-1.0975	-0.71568	-1.03601	-1.91548	-1.44874
126	Healthy Control			SET 1	NO	-0.295838	1.10809	2.25656	-0.0571572	-0.21993	-0.336249	-0.720129	0.237887	0.239991	0.671424	0.161278	-0.221482	1.05815	-0.485833	0.00695347	-0.0447056	NA	2.76389	-0.210673	0.226963	0.598467	0.802238	-0.0557369	-1.26333	3.50389
127	Healthy Control			SET 1	NO	-0.320326	-0.446491	-0.514935	-0.124899	-0.232433	-0.335591	-0.102576	0.0749987	1.11863	-0.0581159	0.268229	-0.761413	0.425725	0.683089	-0.431115	-0.111969	NA	0.434292	-0.253925	-0.696665	-0.723646	-0.99402	-0.217227	0.922268	-0.0744566
128	Healthy Control			SET 1	NO	-0.221081	-0.201535	-0.264301	-1.41192	-0.262029	-0.355006	0.910477	-0.130293	3.06561	-0.461252	-0.85494	1.92418	-0.754449	-0.449244	1.14738	-0.186912	0.433369	-1.06549	-0.083857	-0.110457	0.60123	-0.281762	-0.395767	-0.758434	1.35456
129	Healthy Control			SET 1	NO	-0.245453	-0.589632	-1.51246	-1.01905	-8.14e-05	-0.386382	-0.667199	0.577711	-0.433727	-1.65597	-0.760608	-1.87058	-0.522046	0.0994024	-1.25162	-0.201118	-0.22677	-0.581355	-0.584648	-0.915728	-0.68817	0.442962	-1.05229	-0.584185	-0.779024
130	Healthy Control			SET 1	NO	-0.225871	-0.174584	-1.14639	-1.42547	-0.262029	-0.380309	-1.13665	-0.0211357	-0.726243	-0.506621	-0.60641	-0.359109	0.0976954	0.991976	-1.37817	-0.214357	-1.04094	-0.860759	-0.341306	-0.888207	-0.600006	0.337968	-0.761376	0.70652	-1.00979
131	Healthy Control			SET 1	NO	-0.227999	-0.352462	0.984335	-1.27645	-0.262029	-0.392961	0.887389	-0.572653	0.365482	1.67109	1.58138	1.63475	1.30619	0.0338923	-0.599595	-0.162373	1.13752	1.1601	0.213561	1.23166	0.314697	1.12635	1.55318	-1.50559	2.92163
132	Healthy Control			SET 1	NO	-0.132001	-0.147633	-0.338924	0.836915	-0.262029	0.327678	-0.0746083	-0.687676	-0.487565	1.82232	2.29432	1.29708	1.73226	-0.760417	-0.016354	0.00229604	-1.41502	-0.453696	0.400476	-0.971118	-0.669278	-0.269643	-0.881859	0.669847	-0.916922
133	Healthy Control			SET 1	NO	-0.320326	-0.769287	-0.583867	1.60252	-0.236184	-0.391463	1.61985	-0.669734	-0.512854	-0.466163	-0.0870162	-1.28298	-0.454711	0.281272	-0.187744	-0.37118	NA	-1.04678	-0.263042	2.06046	0.598467	0.986699	0.789477	1.95242	-0.93716
134	Healthy Control			SET 1	NO	-0.182341	-0.169194	-0.77542	-0.829389	-0.262029	-0.372718	-0.259312	-0.173251	-1.01259	-1.05105	0.578191	-1.01837	-0.429085	-0.236337	0.679684	-0.197244	-2.00914	-0.181519	0.0442796	-0.856407	-0.103295	-0.755104	-0.933328	-1.00242	0.269972
135	Healthy Control			SET 1	NO	-0.333898	-1.89778	-0.134631	-0.675302	-0.224396	-0.371086	0.363741	0.80572	0.678903	-0.379608	-1.78577	-2.19756	-0.739923	-0.705006	-1.11256	-0.261261	NA	-0.187962	-0.284668	-0.263183	-1.09168	-0.827439	-0.433506	-0.0661249	0.0983511
136	Healthy Control			SET 1	NO	-0.190508	0.0648174	-0.111076	0.560987	-0.19296	-0.231736	0.0318579	-1.06469	-0.28206	-0.330148	-0.0178567	-0.148022	0.428825	-0.461481	-0.584091	0.810033	NA	0.274872	-0.155548	-0.888682	-0.47282	-0.394686	-0.489643	-0.233177	-0.684267
137	Healthy Control			SET 1	NO	-0.320916	0.994469	-0.178132	-1.1749	-0.233683	-0.336249	1.36779	-1.76004	0.122435	-0.72583	-0.638402	-0.114965	-0.185	-1.10682	1.00825	-0.295713	NA	-0.218817	-0.25647	-0.796649	-0.163389	-0.208275	-0.801022	0.0870064	0.0712347
138	Healthy Control			SET 1	NO	-0.232256	-0.30934	-0.343909	1.54137	-0.172063	-0.319075	0.148575	-0.158954	-0.632925	1.35351	1.14056	0.139356	2.15059	-0.326413	0.140461	-0.180454	0.543392	0.0641638	-0.177902	-0.669236	0.0226533	-0.470789	1.37244	0.618484	0.1759
139	Healthy Control			SET 1	NO	-0.0184991	0.527061	-0.115136	-1.09869	-0.210643	0.107438	2.24021	-0.124846	0.247549	-0.181767	0.431113	0.439658	0.233517	-0.485833	-0.764882	4.08462	NA	-0.717649	-0.197528	2.06304	0.305446	-0.171773	1.1299	-1.05452	-0.480629
140	Healthy Control			SET 1	NO	-0.322982	-0.397426	-0.220612	-1.15796	-0.233683	-0.407238	-1.20185	-2.02609	0.967057	-0.886576	-0.586627	-1.08096	-1.81877	-0.899827	0.0347673	-0.236653	NA	-1.14448	-0.267919	0.480494	0.945405	-0.585286	-0.138149	-0.27494	-1.46657
141	Healthy Control			SET 1	NO	-0.21278	0.0733671	0.542378	-0.206218	-0.148212	-0.347415	-0.32088	-0.648755	0.760288	0.325145	-0.156516	0.589582	-1.10305	-0.588453	0.858508	-0.222429	1.13752	0.191822	0.106585	1.66732	-0.0159185	0.19509	2.20744	0.373095	-0.0658883
142	Healthy Control			SET 1	NO	-0.251413	-0.460266	0.274276	0.213745	-0.262029	-0.426868	-0.605631	-0.0893867	-0.345559	-0.612482	-0.0385998	0.380548	-0.84741	0.31231	-1.37817	-0.235344	-0.336793	-1.18352	-0.440053	1.51677	0.202917	0.0348827	0.832835	1.43119	-0.422246
143	Healthy Control			SET 1	NO	5.71677	-0.115291	2.45241	0.18665	5.74144	2.70974	2.08027	0.605011	0.943958	0.264653	1.08251	0.846854	0.485034	0.156724	-1.37817	-0.283776	-1.21698	3.77108	5.48597	0.974304	0.703564	-0.350436	-0.0646193	-1.44619	1.81386
144	Healthy Control			SET 1	NO	-0.318261	0.284319	-0.360092	-0.116431	-0.247079	-0.415783	-0.269217	1.32959	-0.703157	0.535408	0.0633962	0.329468	1.12635	-0.656301	3.01085	-0.215325	NA	2.17249	-0.243112	-0.509484	-0.205584	0.126864	-0.700094	1.53479	0.0837004
145	Healthy Control			SET 1	NO	-0.15169	-0.260828	0.720111	1.47363	-0.262029	-0.310472	0.0254395	-0.468693	-0.533911	2.45749	1.53603	1.23276	2.04988	0.44333	1.36472	-0.207576	1.24754	0.974634	0.210034	0.186074	1.28608	0.7132	-0.390847	0.738126	0.969788
146	Healthy Control			SET 1	NO	-0.236301	0.0841476	0.772576	-0.192671	-0.262029	-0.358042	-3.07604	-0.36587	0.968536	1.17203	1.84987	-0.64854	0.864625	-0.0807502	1.30144	-0.163987	0.719429	0.341159	-0.331901	1.14425	0.111605	0.98095	1.45111	-0.484817	2.01508
147	Healthy Control			SET 1	NO	-0.216186	4.15917	0.0625962	-0.34169	0.448076	-0.331221	1.18753	0.428607	-0.681847	-0.89982	-0.448584	-0.66462	-1.3432	-0.555698	-0.00534944	-0.135897	1.90768	0.155693	-0.463565	3.05287	0.0250148	-0.879878	2.58942	-1.13432	-0.572019
148	Healthy Control			SET 1	NO	-0.31059	-0.296714	-0.26447	-0.895463	-0.225289	-0.30404	-0.395248	-0.668683	0.0473936	-0.602179	0.490446	1.26241	-0.910429	0.695265	-0.292046	-0.348212	NA	-0.08511	-0.258378	-1.22641	-0.815069	-0.958246	-0.962094	0.518558	0.592344
149	Healthy Control			SET 1	NO	-0.239919	-0.379413	1.36631	-0.721012	-0.262029	-0.384864	-0.236224	-0.625179	1.65547	0.506621	2.13287	0.702139	1.33718	-0.678529	0.996065	-0.167216	-0.534835	-0.709013	0.31466	0.714583	-0.198544	2.86919	-0.51813	2.14703	-0.519619
150	Healthy Control			SET 1	NO	-0.316786	0.181024	-0.56157	0.179939	-0.222788	-0.358597	0.0472618	0.106175	-1.32778	-0.565084	-0.0847487	-0.214136	-0.353957	-0.157074	-0.382441	-0.17267	NA	-0.373095	-0.210249	-0.575332	-1.22295	-0.617586	-0.202125	0.852663	0.280111
151	Healthy Control			SET 1	NO	-0.322687	-0.712475	-0.683574	0.29002	-0.1751	-0.380946	-0.904975	1.0751	-1.95605	-0.169402	1.38385	1.71419	0.55283	-0.485833	0.820509	-0.249777	NA	0.639996	-0.216398	-1.06713	-0.168077	0.0632671	-0.496847	-1.76449	-0.0920066
152	Healthy Control			SET 1	NO	1.09145	1.13908	0.342625	0.163004	-0.219573	1.10524	-0.934383	-0.18212	0.939929	0.288106	0.244798	0.0209361	-0.109047	-0.838945	-0.994346	-0.527034	NA	0.475433	0.0867903	-0.216005	0.0358658	3.46126	0.285975	1.15893	-0.832805
153	Surgical Control				YES	-0.236407	-0.54651	5.76878	-2.11637	-0.262029	-0.39954	0.0870073	-0.494833	0.549777	0.158792	-0.47761	-0.937971	-0.769943	-0.924192	-0.140155	-0.256331	0.0592902	-0.846307	-0.606984	2.15001	-1.01013	-1.29532	1.05816	-0.890846	-1.1863
154	Surgical Control				YES	-0.232363	-0.519559	-1.66804	-1.15452	-0.0490397	-0.426868	-0.0361284	-0.485019	-0.746139	-1.20228	-1.14882	-1.01837	-1.01009	-0.310035	0.140461	-0.258268	-0.600849	-0.653614	-0.672815	1.26763	-0.582688	-0.508155	-0.588415	0.0536889	-1.52932
155	Surgical Control				YES	-0.145198	-0.519559	-1.39661	-1.43901	-0.262029	-0.308954	-0.343968	-0.549367	0.91072	-0.733467	-0.100279	1.55435	0.70969	-1.25993	-0.294219	0.888279	-1.26099	0.353202	-0.457687	-0.61042	-0.83616	-1.77932	-1.06358	-0.830368	-0.666302
156	Surgical Control				YES	-0.238216	-0.368632	2.28916	-1.19516	-0.262029	-0.208247	2.88065	-0.556527	1.23452	-2.89606	-0.60641	0.0267992	-1.06432	-0.293658	2.23683	-0.155269	1.00549	-0.0394082	-0.500007	1.05031	-0.696042	-0.546434	0.943422	2.01119	-0.303571
157	Surgical Control				YES	-0.230873	-0.735168	-0.952915	-1.05969	-0.262029	-0.333751	-0.959646	-0.573634	0.252502	-0.189038	2.53015	-1.21132	-0.893891	0.31231	1.90669	-0.141709	0.763438	-1.26541	-0.0979638	0.162415	-0.681873	1.40797	-0.126532	-0.147602	0.98639
158	Surgical Control				YES	-0.235556	-0.627364	2.27918	-0.517804	-0.262029	-0.252781	0.240927	-0.542007	-0.368655	-0.491498	0.228071	-0.262632	-1.05657	-0.596642	0.0469222	-0.158821	0.34535	-0.846307	-0.351886	1.40133	-0.326067	-0.778541	-0.549138	0.470975	-1.0776
159	Surgical Control				YES	-0.229596	0.0787573	7.33015	-0.0842936	-0.262029	-0.310472	2.03409	-0.408047	-0.216116	1.414	-0.659019	0.0911172	0.198403	-0.981513	0.993314	-0.173997	1.73164	-0.472966	-0.508236	2.73546	0.890912	0.655142	0.464914	2.94524	-0.0224166
160	Surgical Control				YES	-0.230447	-0.632754	2.27032	-0.422973	-0.262029	-0.384358	0.871997	-0.718233	2.57959	-2.27602	0.750529	-0.98621	-1.80026	0.271366	0.745712	-0.217585	-0.710872	-0.880028	-0.511763	1.13456	-0.581114	0.0611159	-0.233837	-0.25072	0.261638
161	Surgical Control				YES	-0.185215	-0.444096	0.750972	-0.34169	-0.262029	-0.410167	2.87295	-0.507725	-0.731002	-0.733467	-0.216381	0.573503	-0.390351	-0.506565	0.423828	-0.189818	-0.292784	-0.463331	-0.505885	-0.100162	-0.758229	-0.589786	-0.427998	-0.0338072	-1.71267
162	Surgical Control				YES	-0.161588	-0.557291	1.6193	-1.56094	-0.262029	-0.103997	-0.944254	-0.482432	-0.67186	-0.703221	1.6485	-0.455586	-0.940372	-0.686718	-1.37817	1.9357	-1.50304	-0.656023	-0.0121475	0.648672	-0.393765	1.6133	-0.63058	-0.205348	0.448644
163	Surgical Control				YES	-0.237897	-0.686656	9.18922	0.593066	-0.262029	-0.395998	0.248623	-0.411549	0.0367627	-0.763713	-1.19418	-0.793256	-1.51363	-0.727662	0.586145	-0.222429	0.169313	-0.480192	-0.127353	2.54801	0.531959	-0.855615	0.569046	-0.301463	-0.927582
